# Supplementary material for: Design, Synthesis, In Silico and In Vitro Studies of New Immunomodulatory Anticancer Nicotinamide Derivatives Targeting VEGFR-2
Source: MDPI journal article supplement (doi:10.3390/molecules27134079), 2022-06-24
Supplement: s1 [file s1]

**Design, Synthesis, In Silico and In Vitro Studies of New Immunomodulatory  
Anticancer Nicotinamide Derivatives Targeting VEGFR-2**

Reda G. Yousef<sup>1</sup>, Wagdy M. Eldehna<sup>2</sup>, Alaa Elwan<sup>1</sup>, Abdelaziz S. Abdelaziz<sup>1</sup>, Ahmed  
B. M. Mehany<sup>3</sup>, Ibraheem M. M. Gobaara<sup>3</sup>, Bshra A. Alsouk<sup>4</sup>,  
Eslam B. Elkaeed<sup>5</sup>, Ahmed M. Metwaly<sup>6,7,\*</sup>, Ibrahim. H. Eissa<sup>1,\*</sup>

<sup>1</sup> Pharmaceutical Medicinal Chemistry & Drug Design Department, Faculty of  
Pharmacy (Boys), Al-Azhar University, Cairo 11884, Egypt

<sup>2</sup> Department of Pharmaceutical Chemistry, Faculty of Pharmacy, Kafrelsheikh  
University, P.O. Box 33516, Kafrelsheikh, Egypt

<sup>3</sup> Zoology Department, Faculty of Science (Boys), Al-Azhar University,  
Cairo 11884, Egypt

<sup>4</sup> Department of Pharmaceutical Sciences, College of Pharmacy, Princess Nourah bint  
Abdulrahman University, P.O. Box 84428, Riyadh 11671, Saudi Arabia

<sup>5</sup> Department of Pharmaceutical Sciences, College of Pharmacy, AlMaarefa University,  
Riyadh 13713, Saudi Arabia

<sup>6</sup> Pharmacognosy and Medicinal Plants Department, Faculty of Pharmacy (Boys),  
Al-Azhar University, Cairo 11884, Egypt

<sup>7</sup> Biopharmaceutical Products Research Department, Genetic Engineering and  
Biotechnology Research Institute, City of Scientific Research and Technological  
Applications (SRTA-City), Alexandria, Egypt

**\* Corresponding authors:**

**Ibrahim H. Eissa**

Medicinal Chemistry Department, Faculty of Pharmacy (Boys),  
Al-Azhar University, Cairo 11884, Egypt.   **Email:** Ibrahimeissa@azhar.edu.eg

**Ahmed M. Metwaly**

Pharmacognosy and Medicinal Plants Department, Faculty of Pharmacy (Boys), Al-  
Azhar University, Cairo 11884, Egypt.   **Email:** ametwaly@azhar.edu.eg



## Content

|   |                                                                                                                                                                                                                                                                                                             |
|---|-------------------------------------------------------------------------------------------------------------------------------------------------------------------------------------------------------------------------------------------------------------------------------------------------------------|
| 1 | <b>4.2. Chemistry and materials</b>                                                                                                                                                                                                                                                                         |
| 2 | <b>Spectral data of final target compounds 6,7,8,11, and 12</b>                                                                                                                                                                                                                                             |
| 3 | <b>4.3. Experimental of Biological testing</b><br>4.3.1. In vitro anti-proliferative activity<br>4.3.2. In vitro VEGFR-2 kinase assay<br>4.3.3. Flow cytometry analysis for cell cycle<br>4.3.4. Flow cytometry analysis for apoptosis<br>4.3.5. Quantitative Real Time Reverse-Transcriptase PCR technique |
| 4 | <b>4.4. Experimental of <i>in silico</i> studies</b><br>4.4.1. Docking studies<br>4.4.2. ADMET studies<br>4.4.3. Toxicity studies                                                                                                                                                                           |
| 5 | <b><i>In silico</i> toxicity data of final target compounds 6,7,8,11, and 12</b>                                                                                                                                                                                                                            |



All melting points were carried out by open capillary method on a Gallen kamp Melting point apparatus. The infrared spectra were recorded on pye Unicam SP 1000 IR spectrophotometer using potassium bromide disc technique. Proton magnetic resonance  $^1\text{H}$ NMR spectra were recorded on a Bruker 400 Megahertz-nuclear magnetic resonance (400 MHz-NMR) spectrophotometer. Carbon-13 ( $^{13}\text{C}$ ) nuclear magnetic resonance ( $^{13}\text{C}$ NMR) spectra were recorded on a Bruker 100 Megahertz-nuclear magnetic resonance (100 MHz-NMR) spectrophotometer. Tetramethylsilane (TMS) was used as internal standard and chemical shifts were measured in  $\delta$  scale one part per million (ppm). All compounds were within  $\pm 0.4$  of the theoretical values. The reactions were monitored by thin-layer chromatography (TLC) using TLC sheets precoated with UV fluorescent silica gel Merck 60 F254 plates and were visualized using ultraviolet (UV) lamp and different solvents as mobile phases.



# IR of compound 6

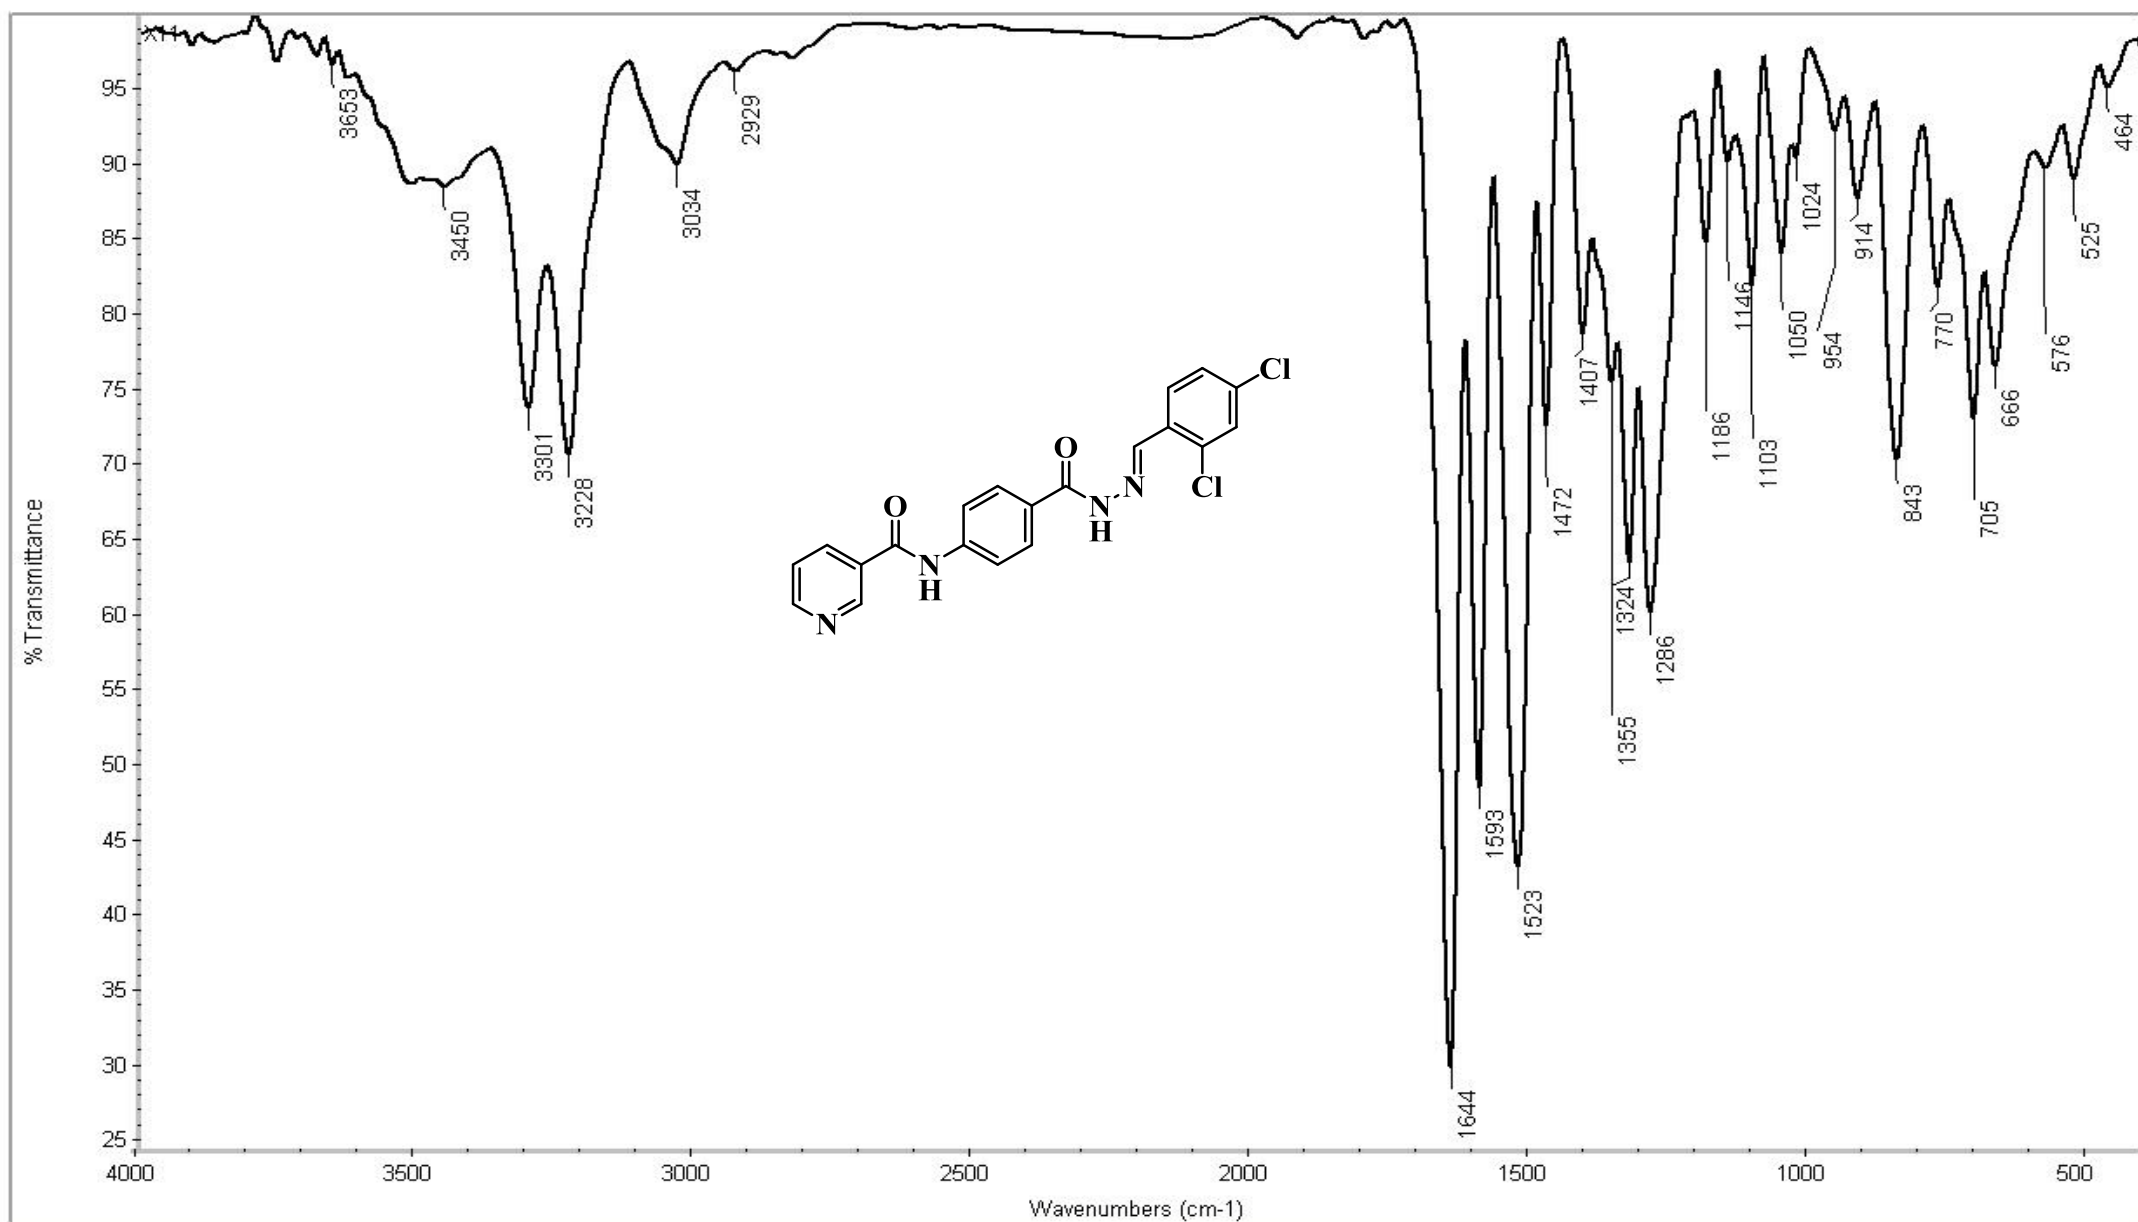



# 1H NMR of compound 6

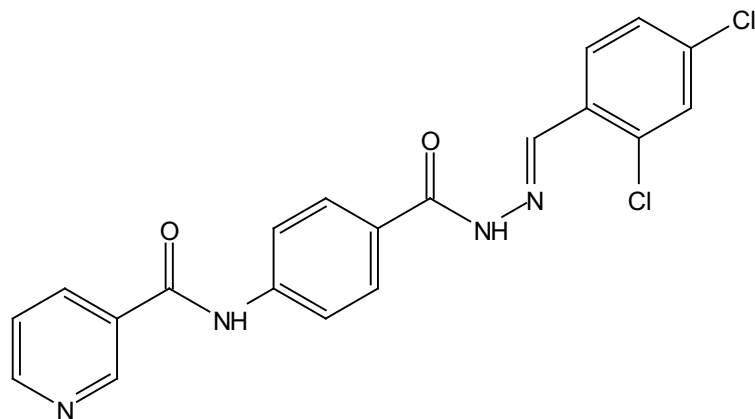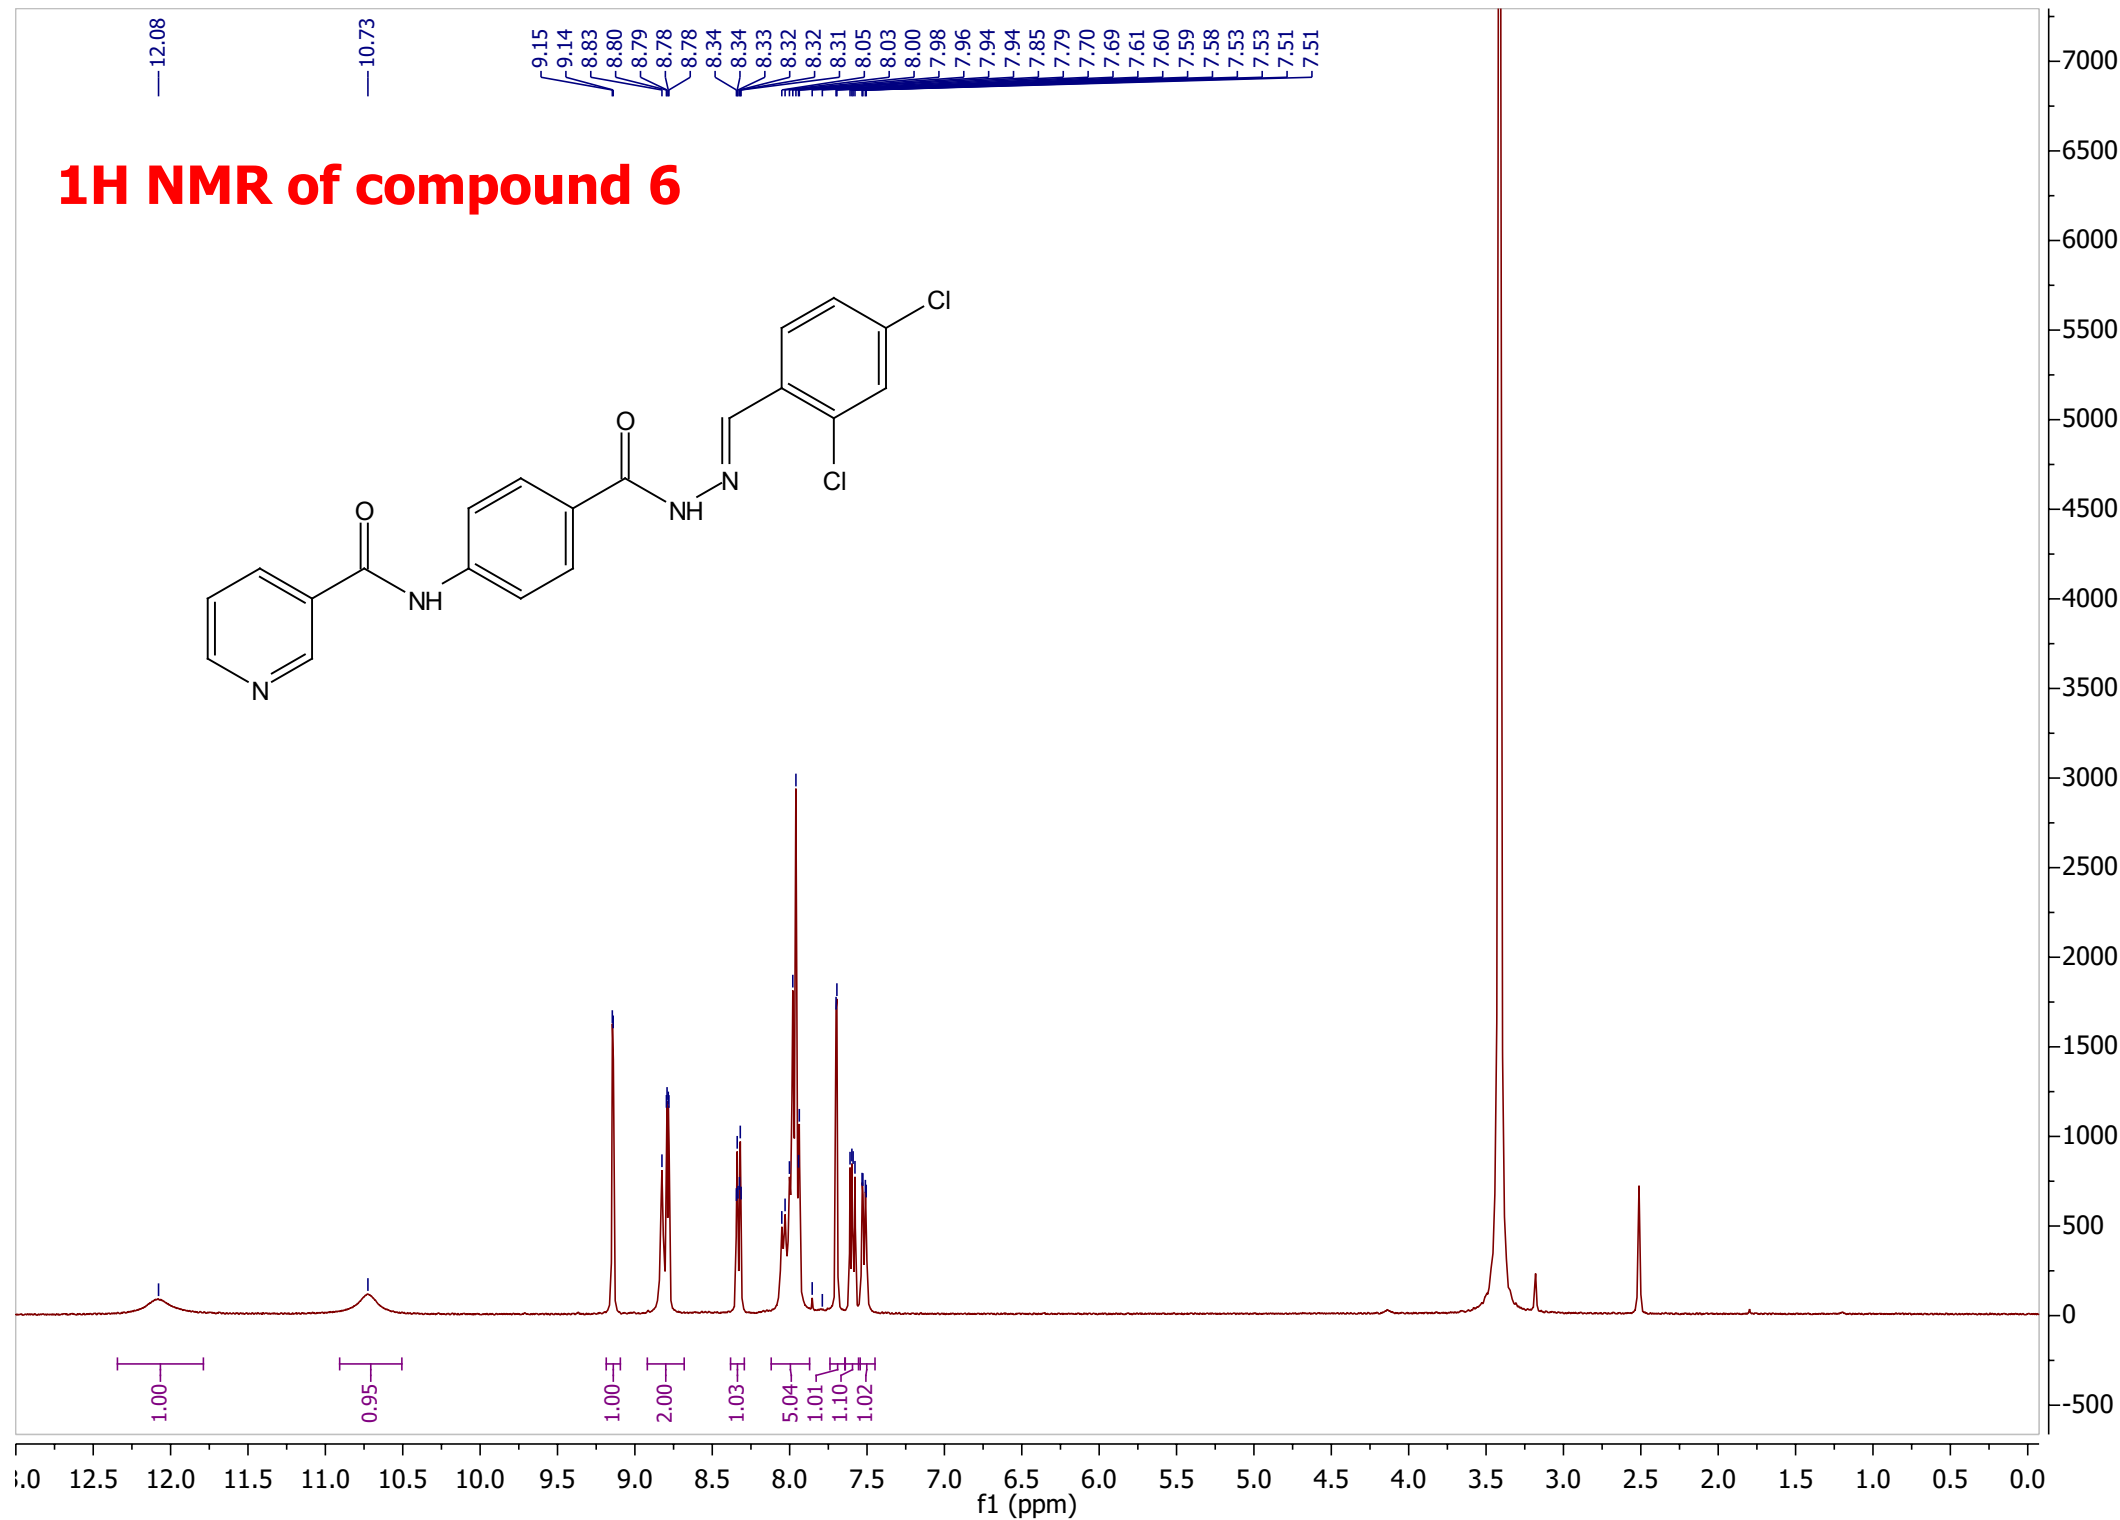



# 1H NMR of compound 6

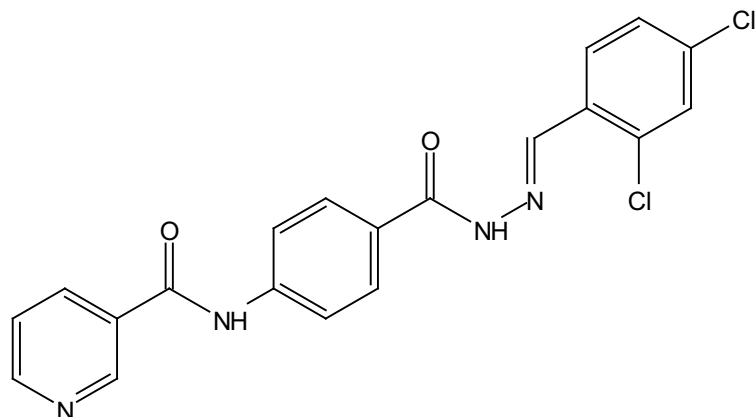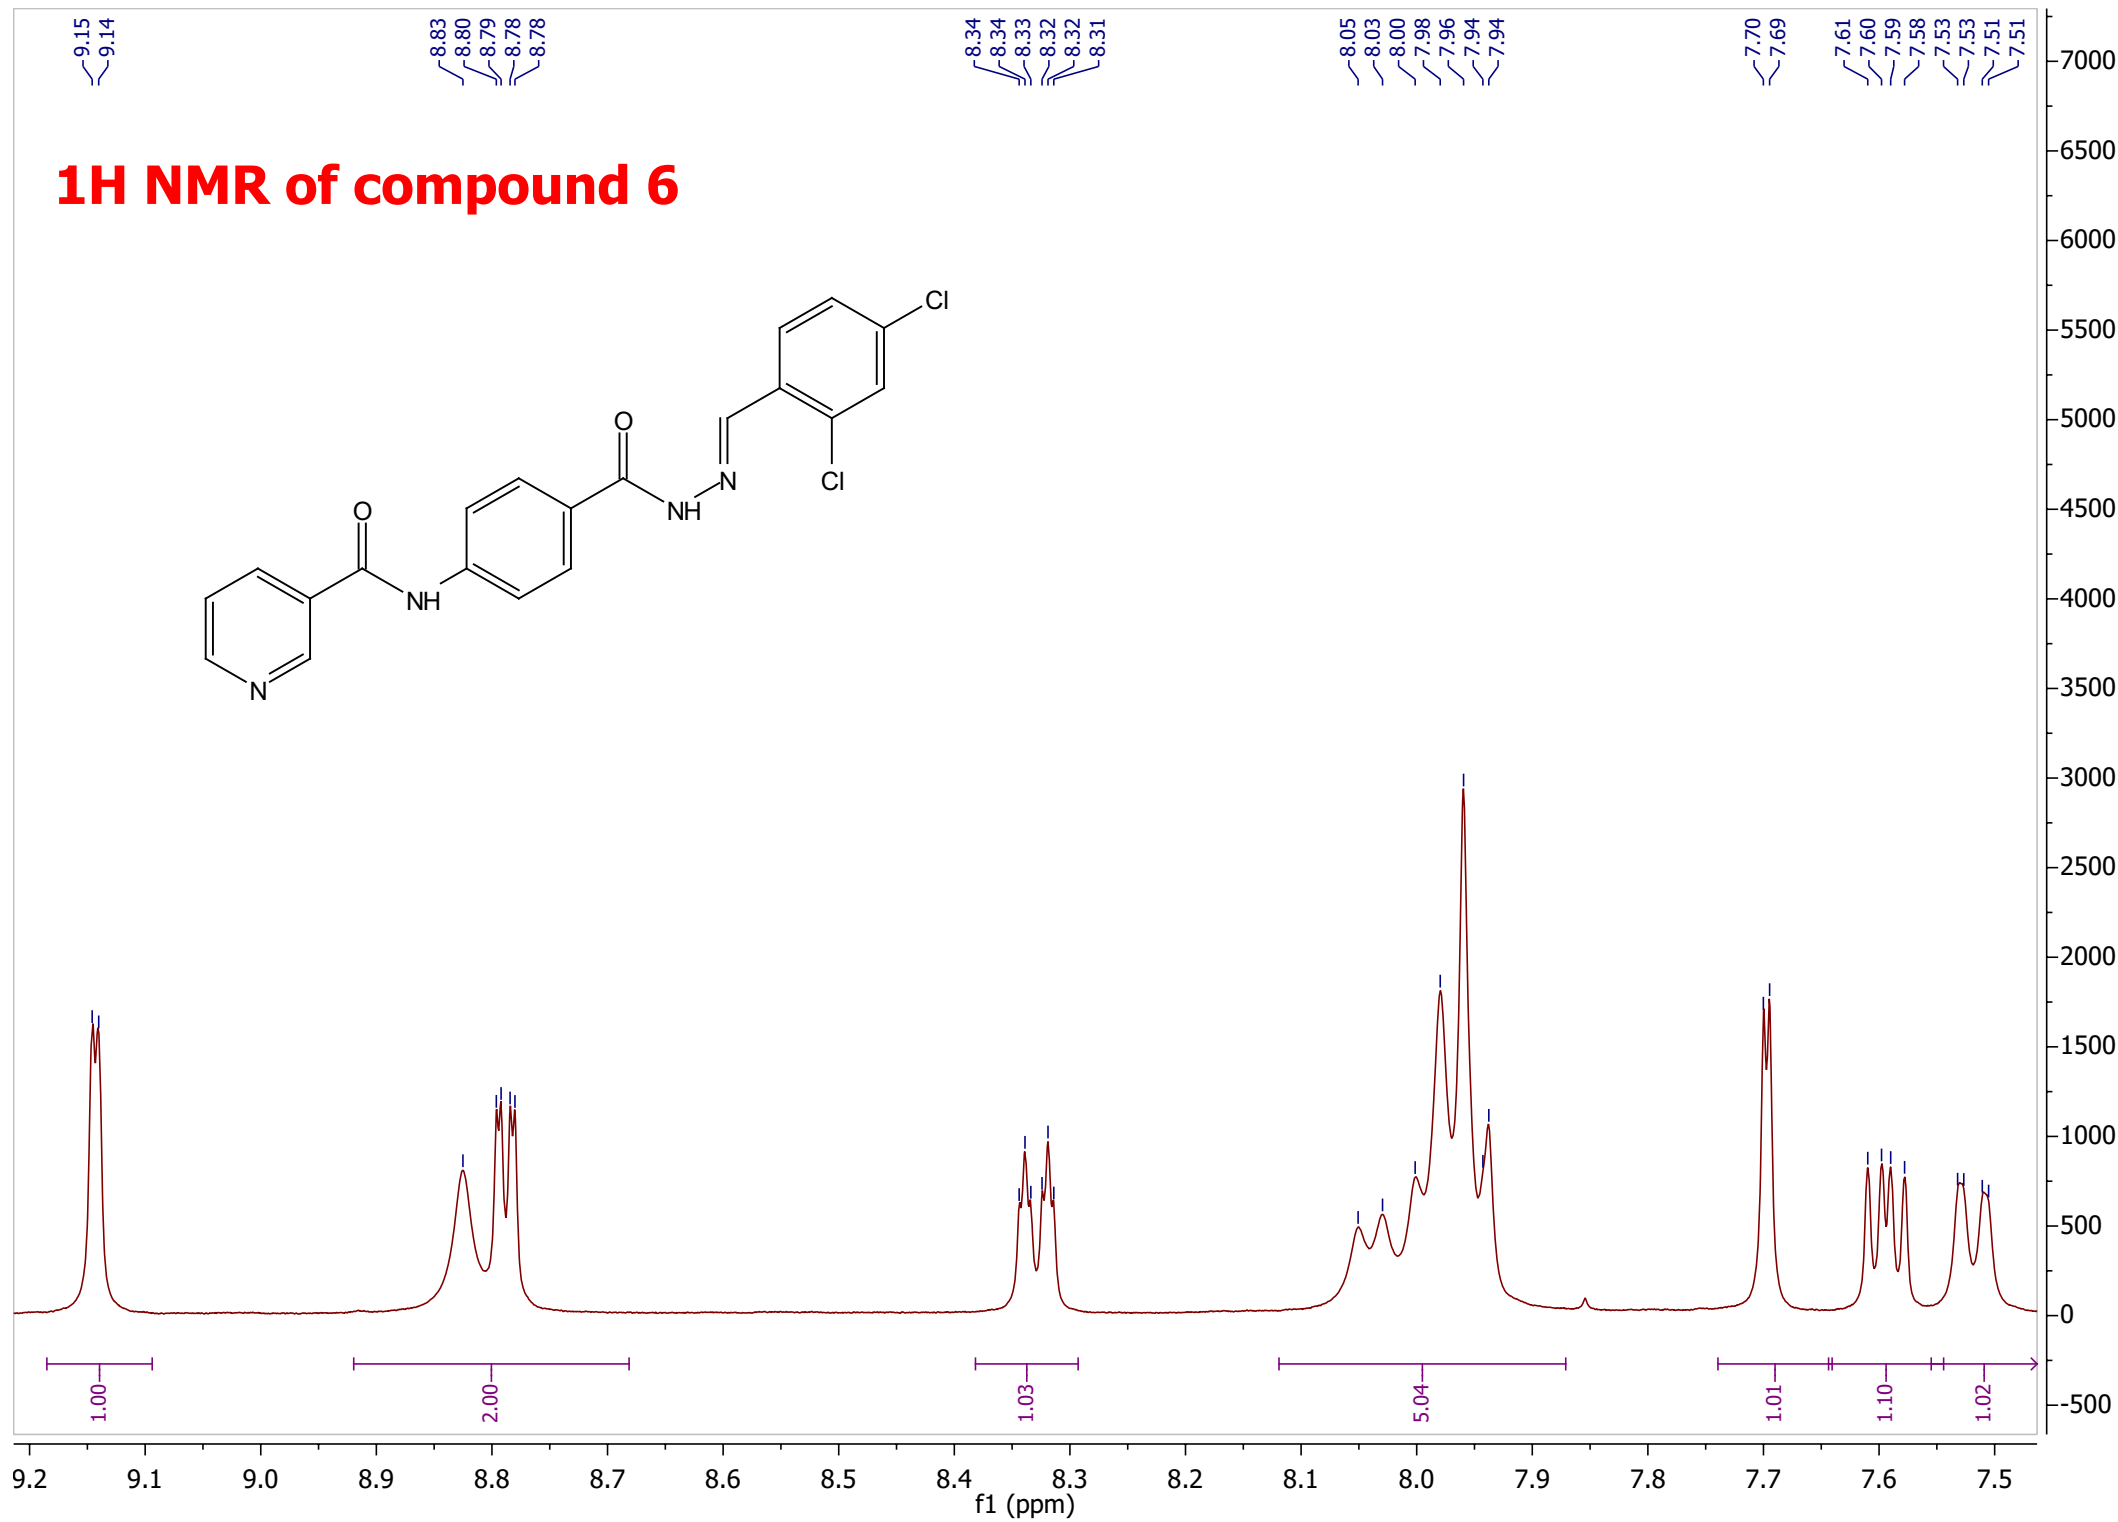



# **<sup>13</sup>C NMR of compound 6**

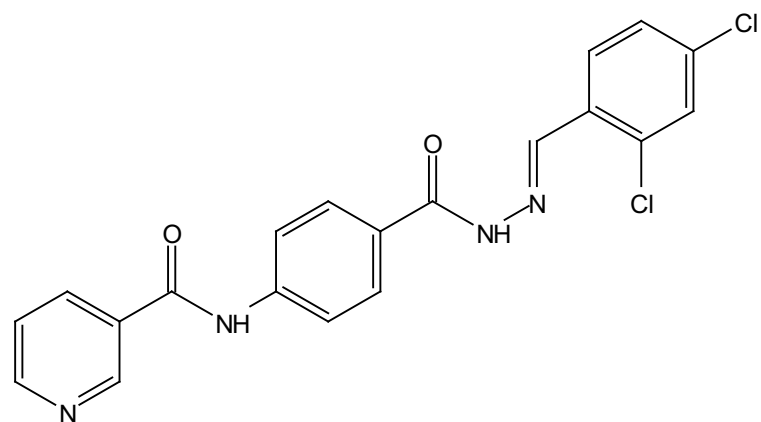

164.92  
163.13  
152.78  
149.18  
142.84  
142.66  
136.06  
135.50  
134.29  
131.22  
130.77  
129.81  
129.07  
128.54  
128.46  
124.03  
122.38  
120.10

40.52 DMSO  
40.31 DMSO  
40.10 DMSO  
39.99 DMSO  
39.68 DMSO  
39.47 DMSO  
39.26 DMSO

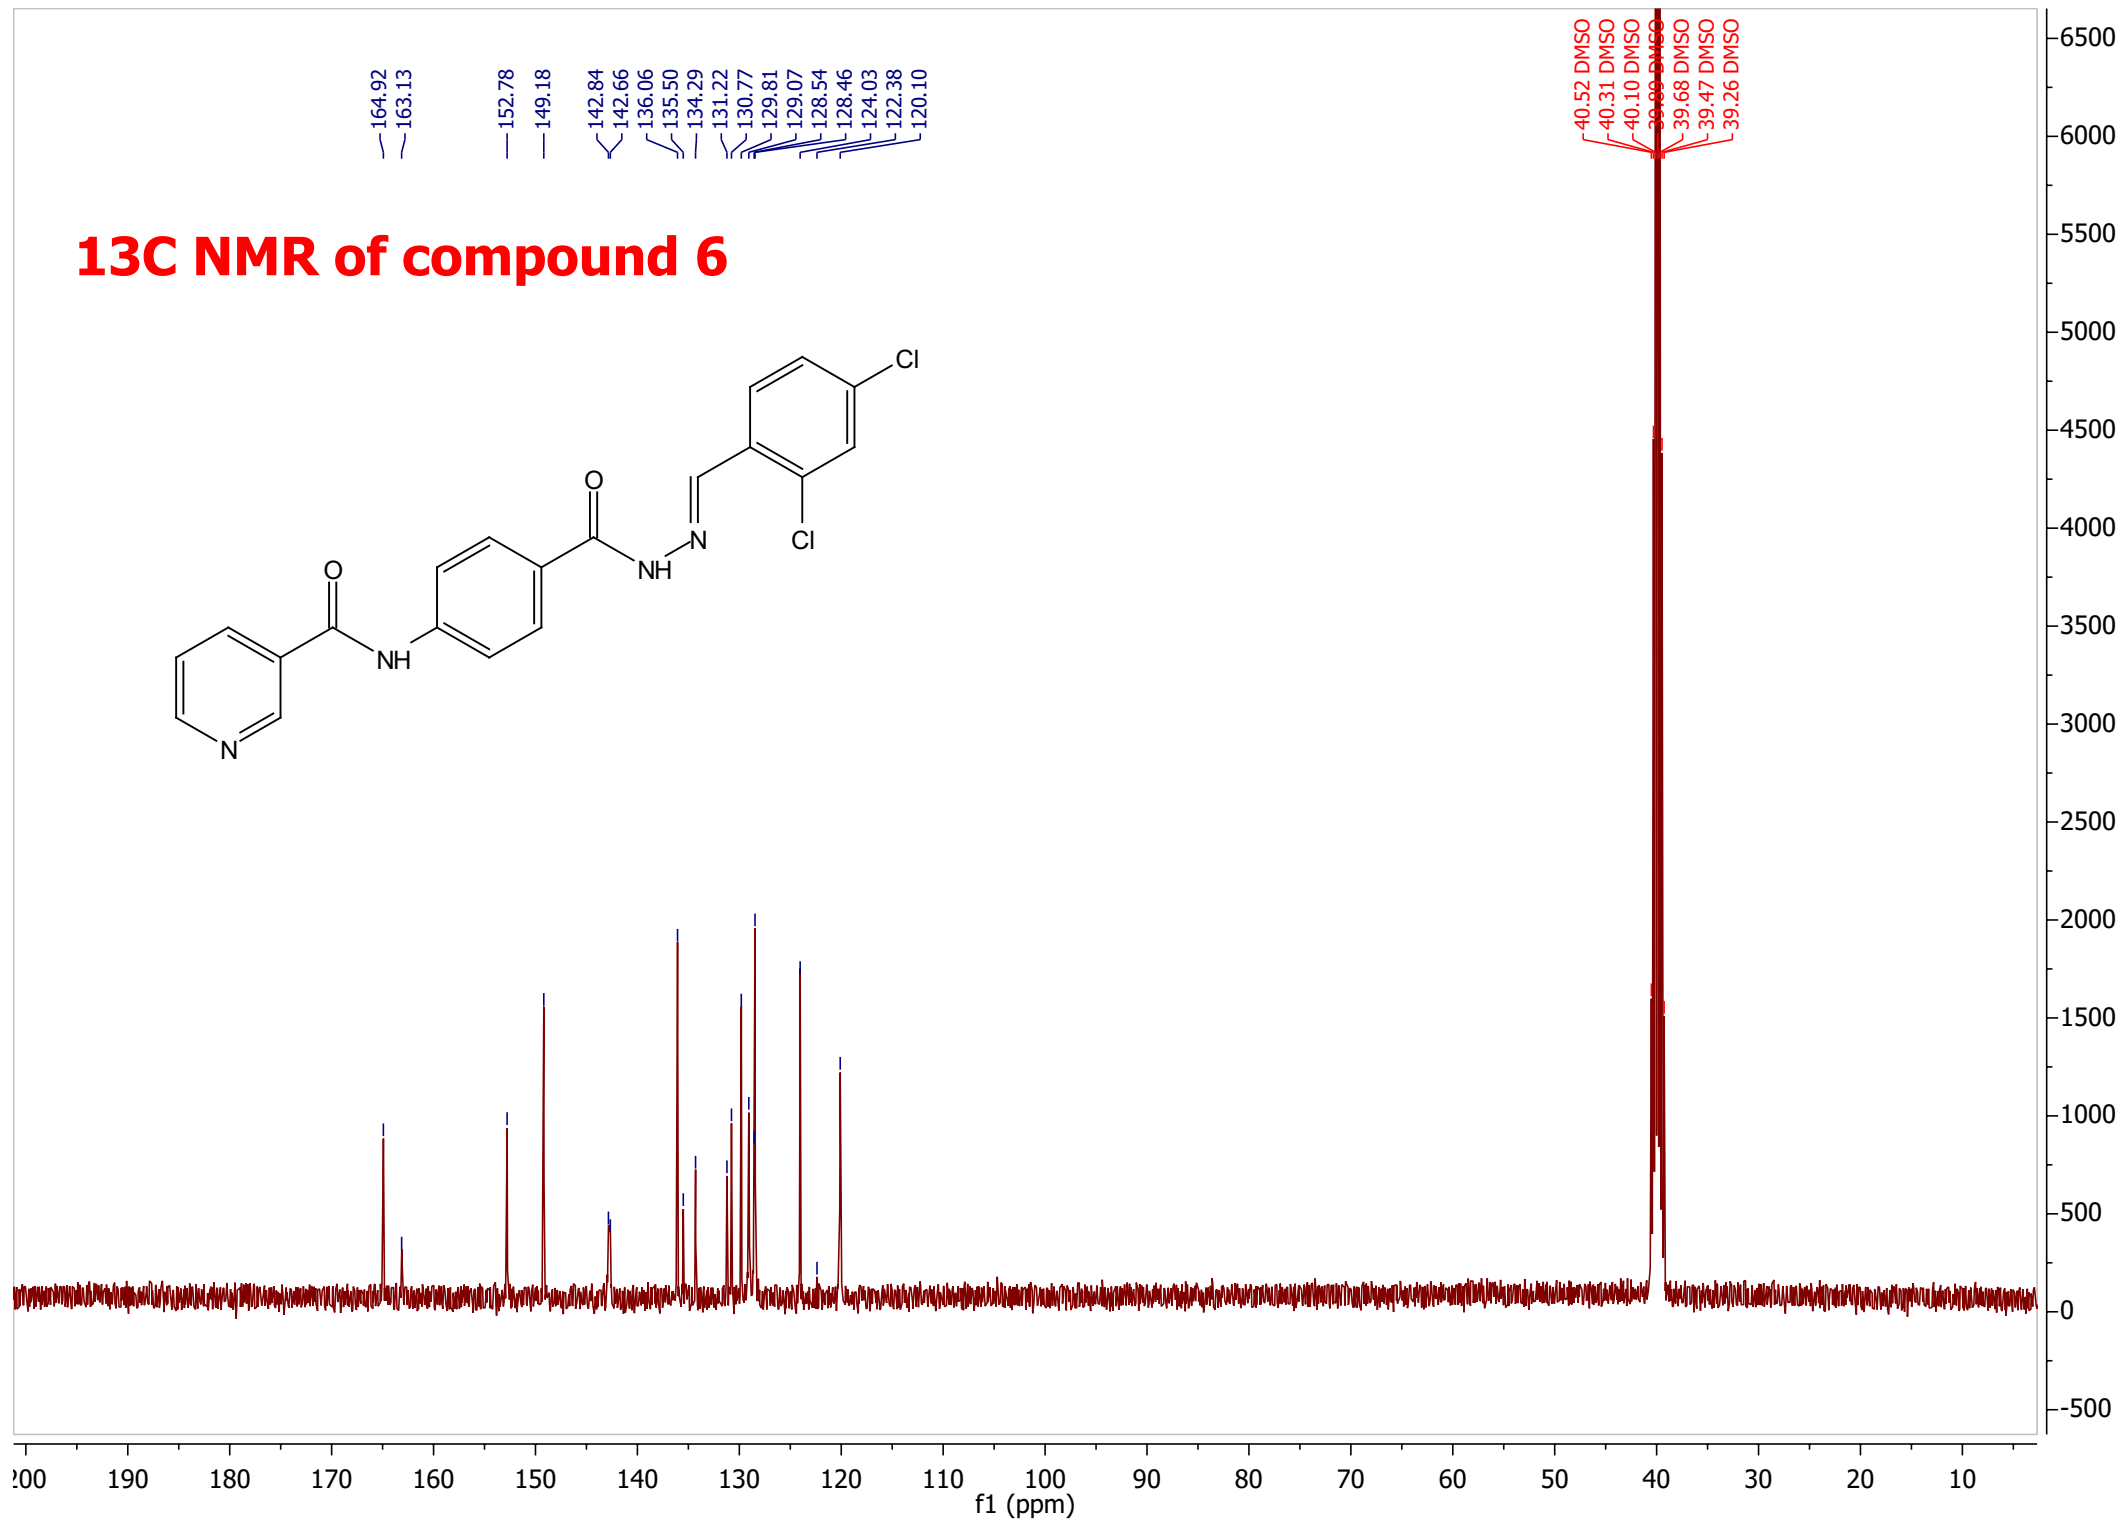



# IR of compound 7

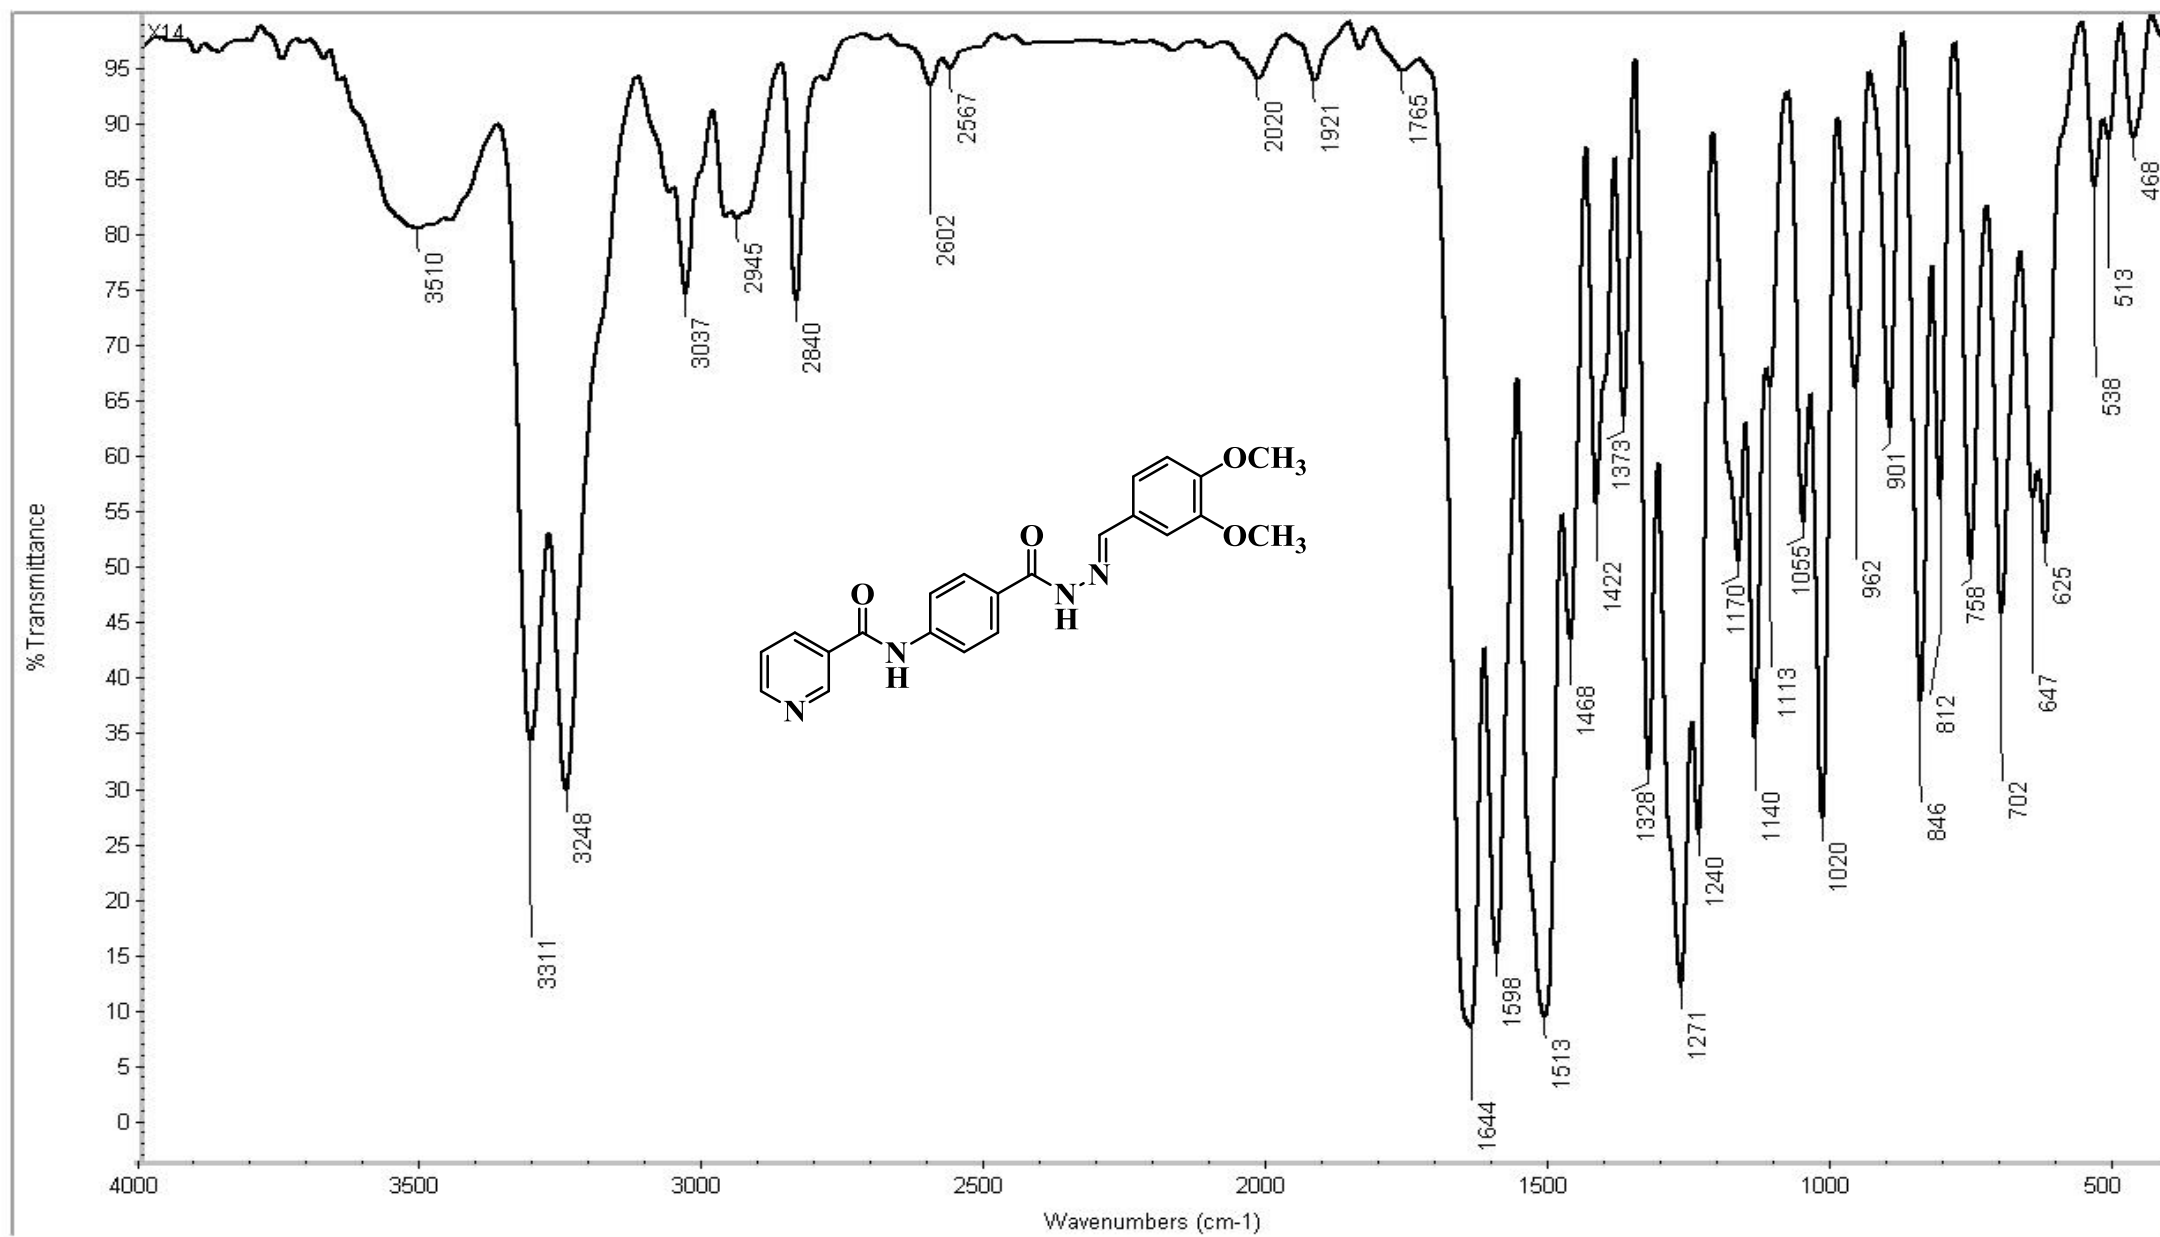



# 1H NMR of compound 7

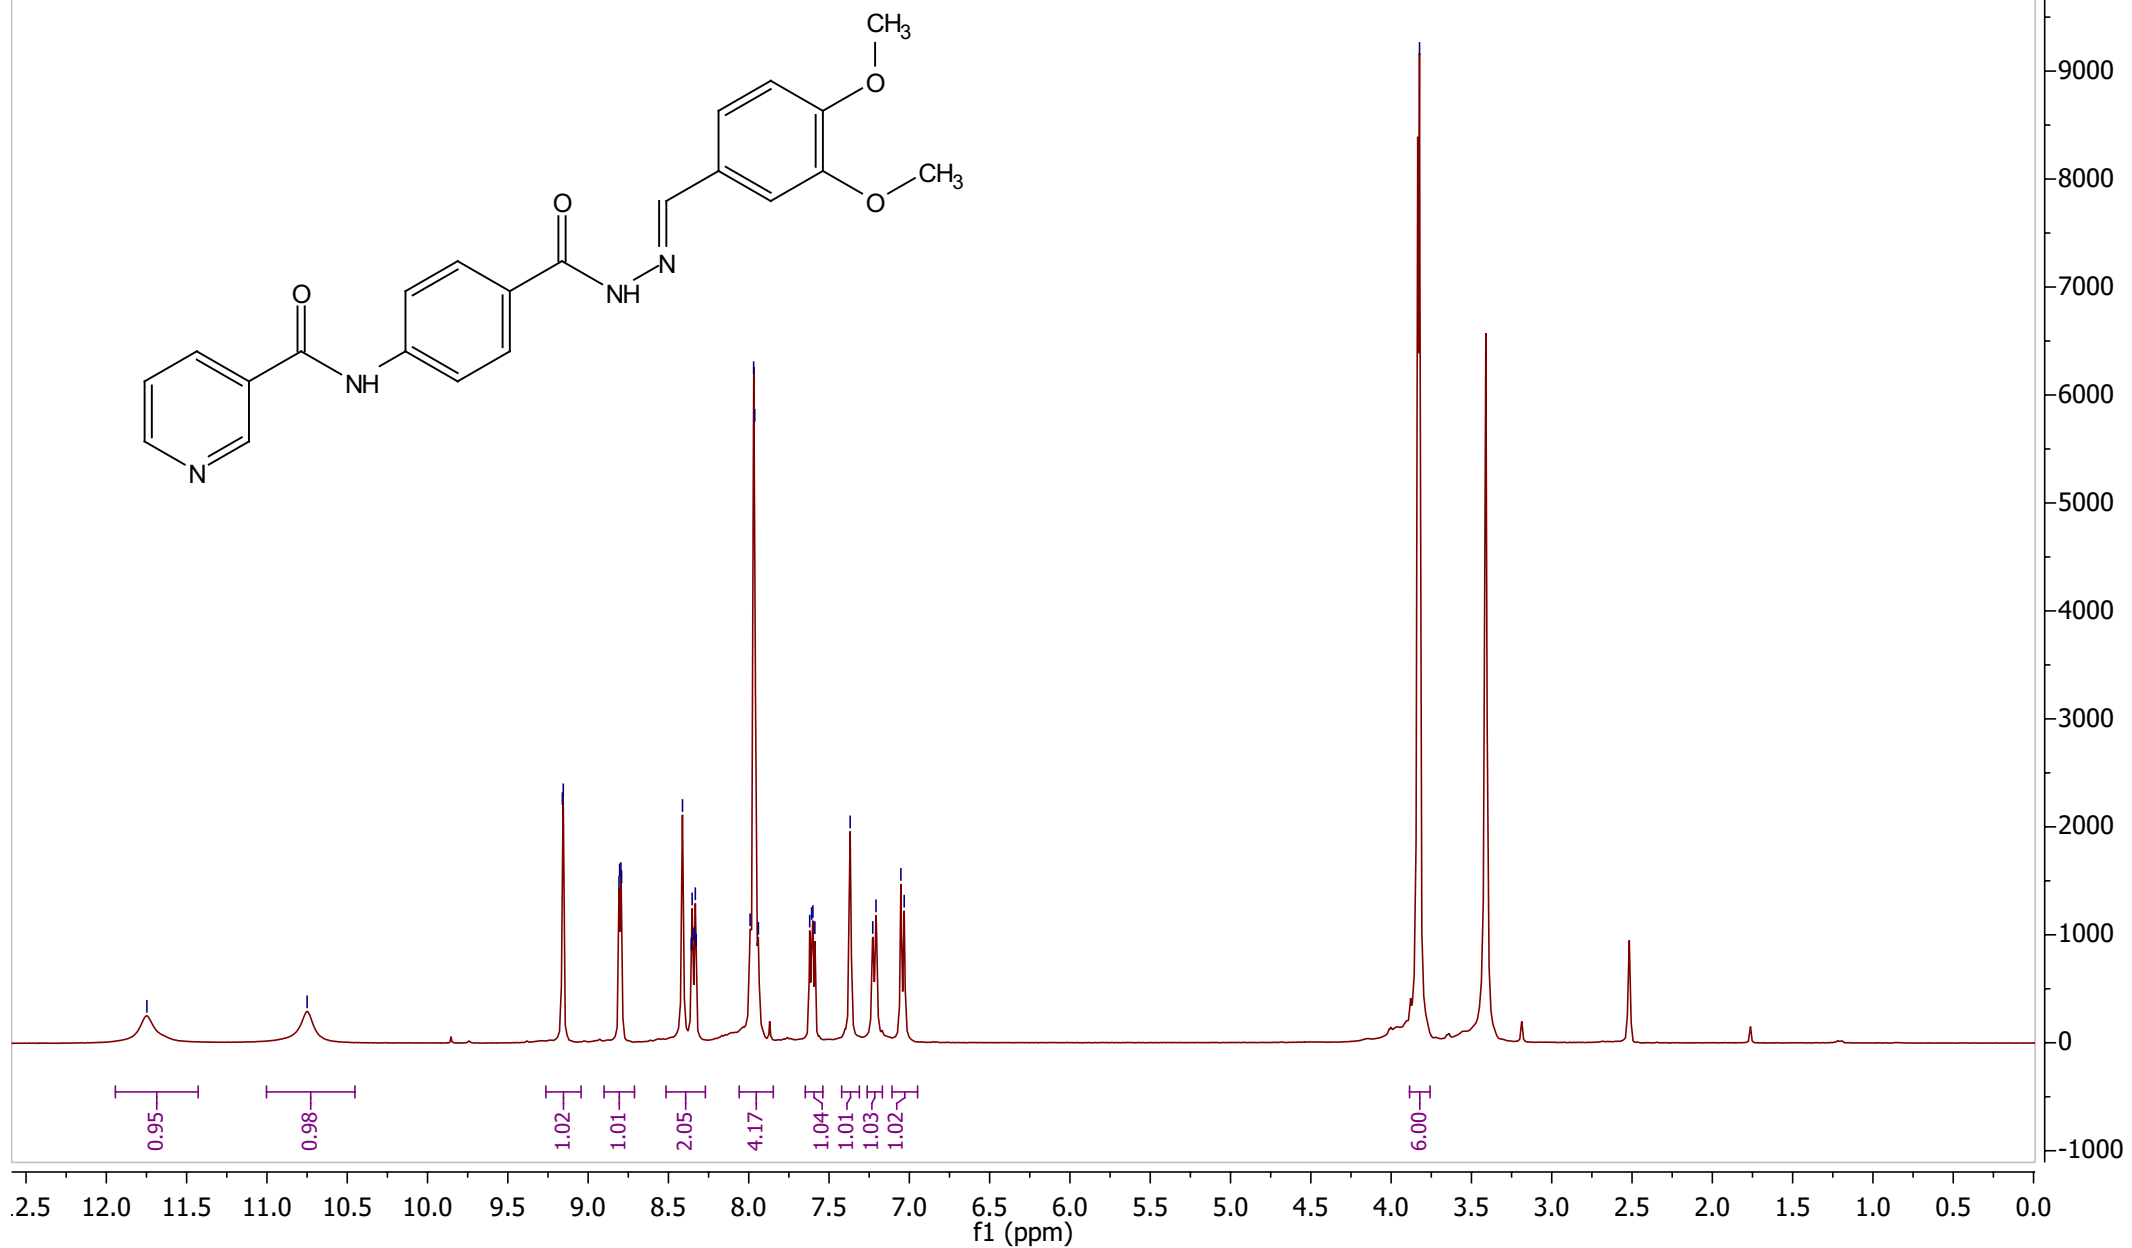



# 1H NMR of compound 7

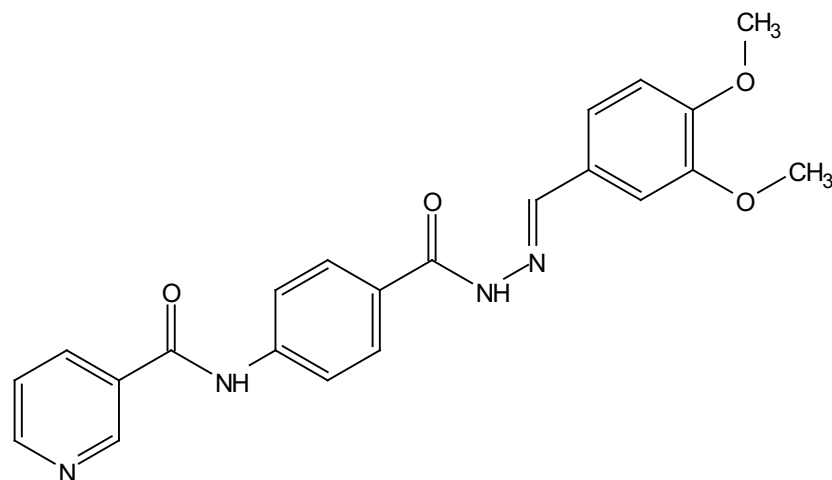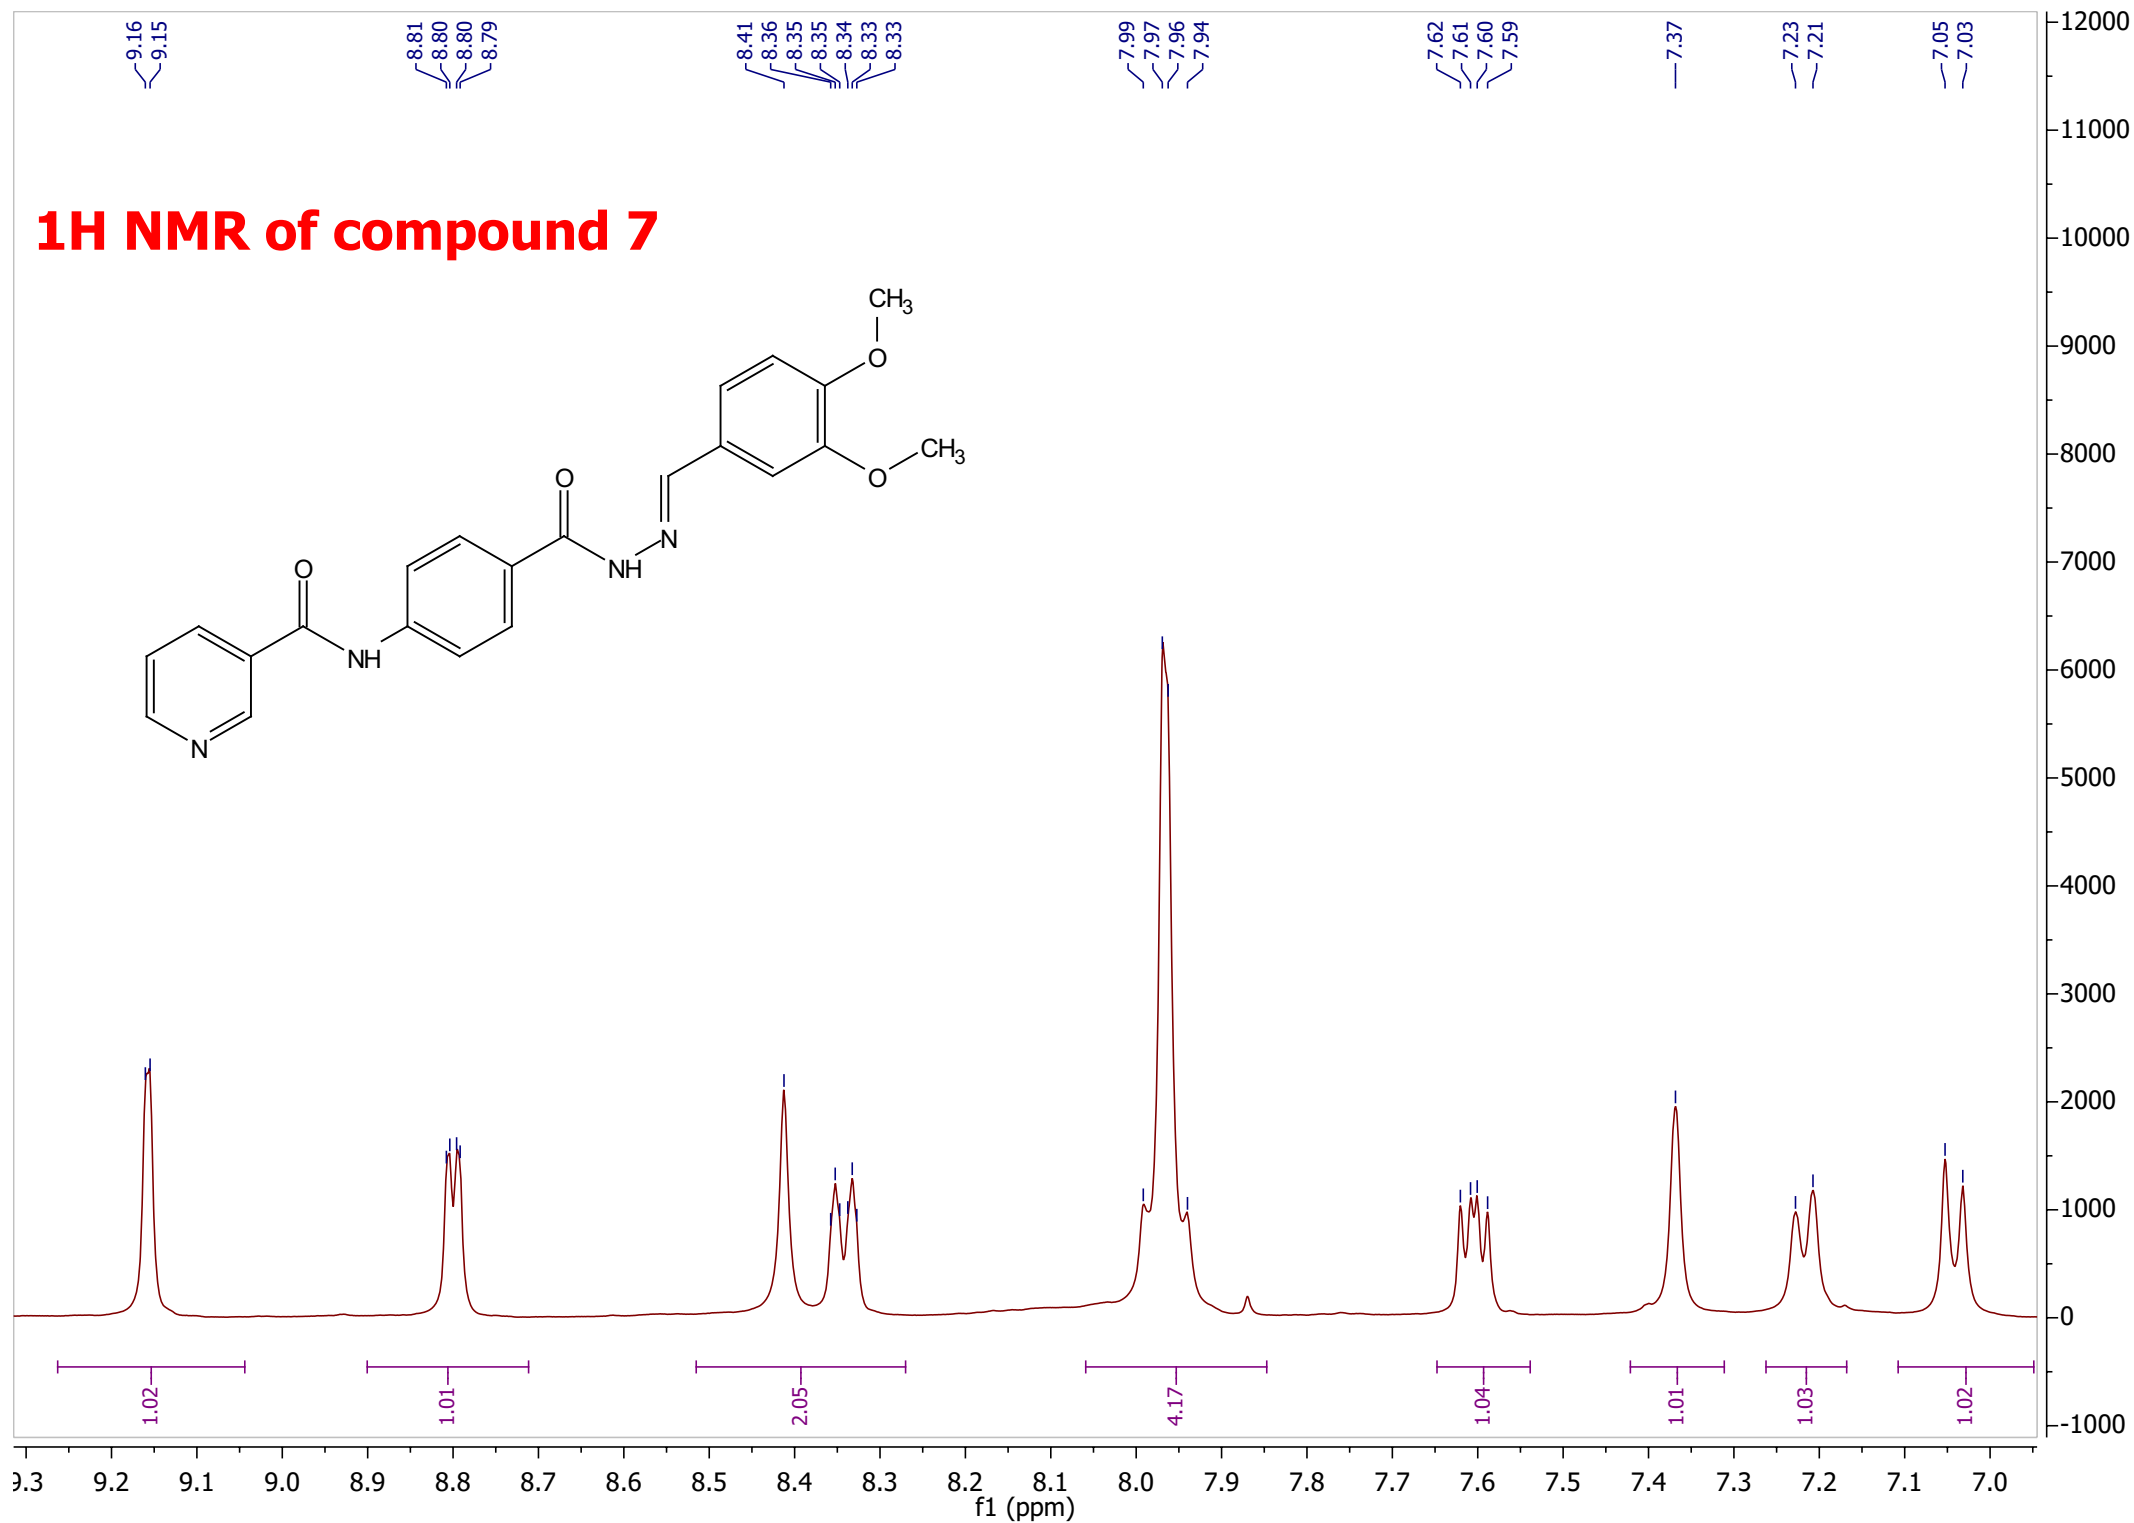



# 13C NMR of compound 7

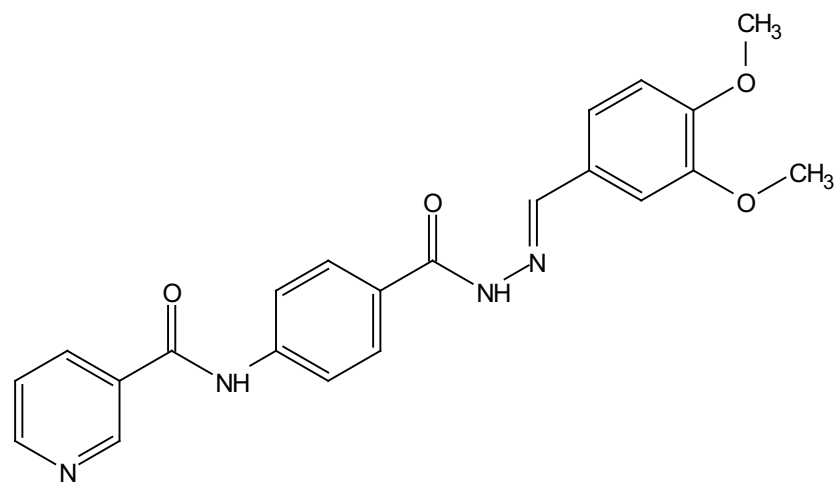

164.89  
162.91  
152.80  
151.20  
149.55  
149.24  
148.26  
142.39  
136.06  
130.82  
129.04  
128.93  
127.57  
124.02  
122.38  
120.08  
111.95  
108.65

56.04  
55.92

40.58 DMSO  
40.38 DMSO  
40.17 DMSO  
39.96 DMSO  
39.75 DMSO  
39.54 DMSO  
39.33 DMSO

f1 (ppm)



# IR of compound 8

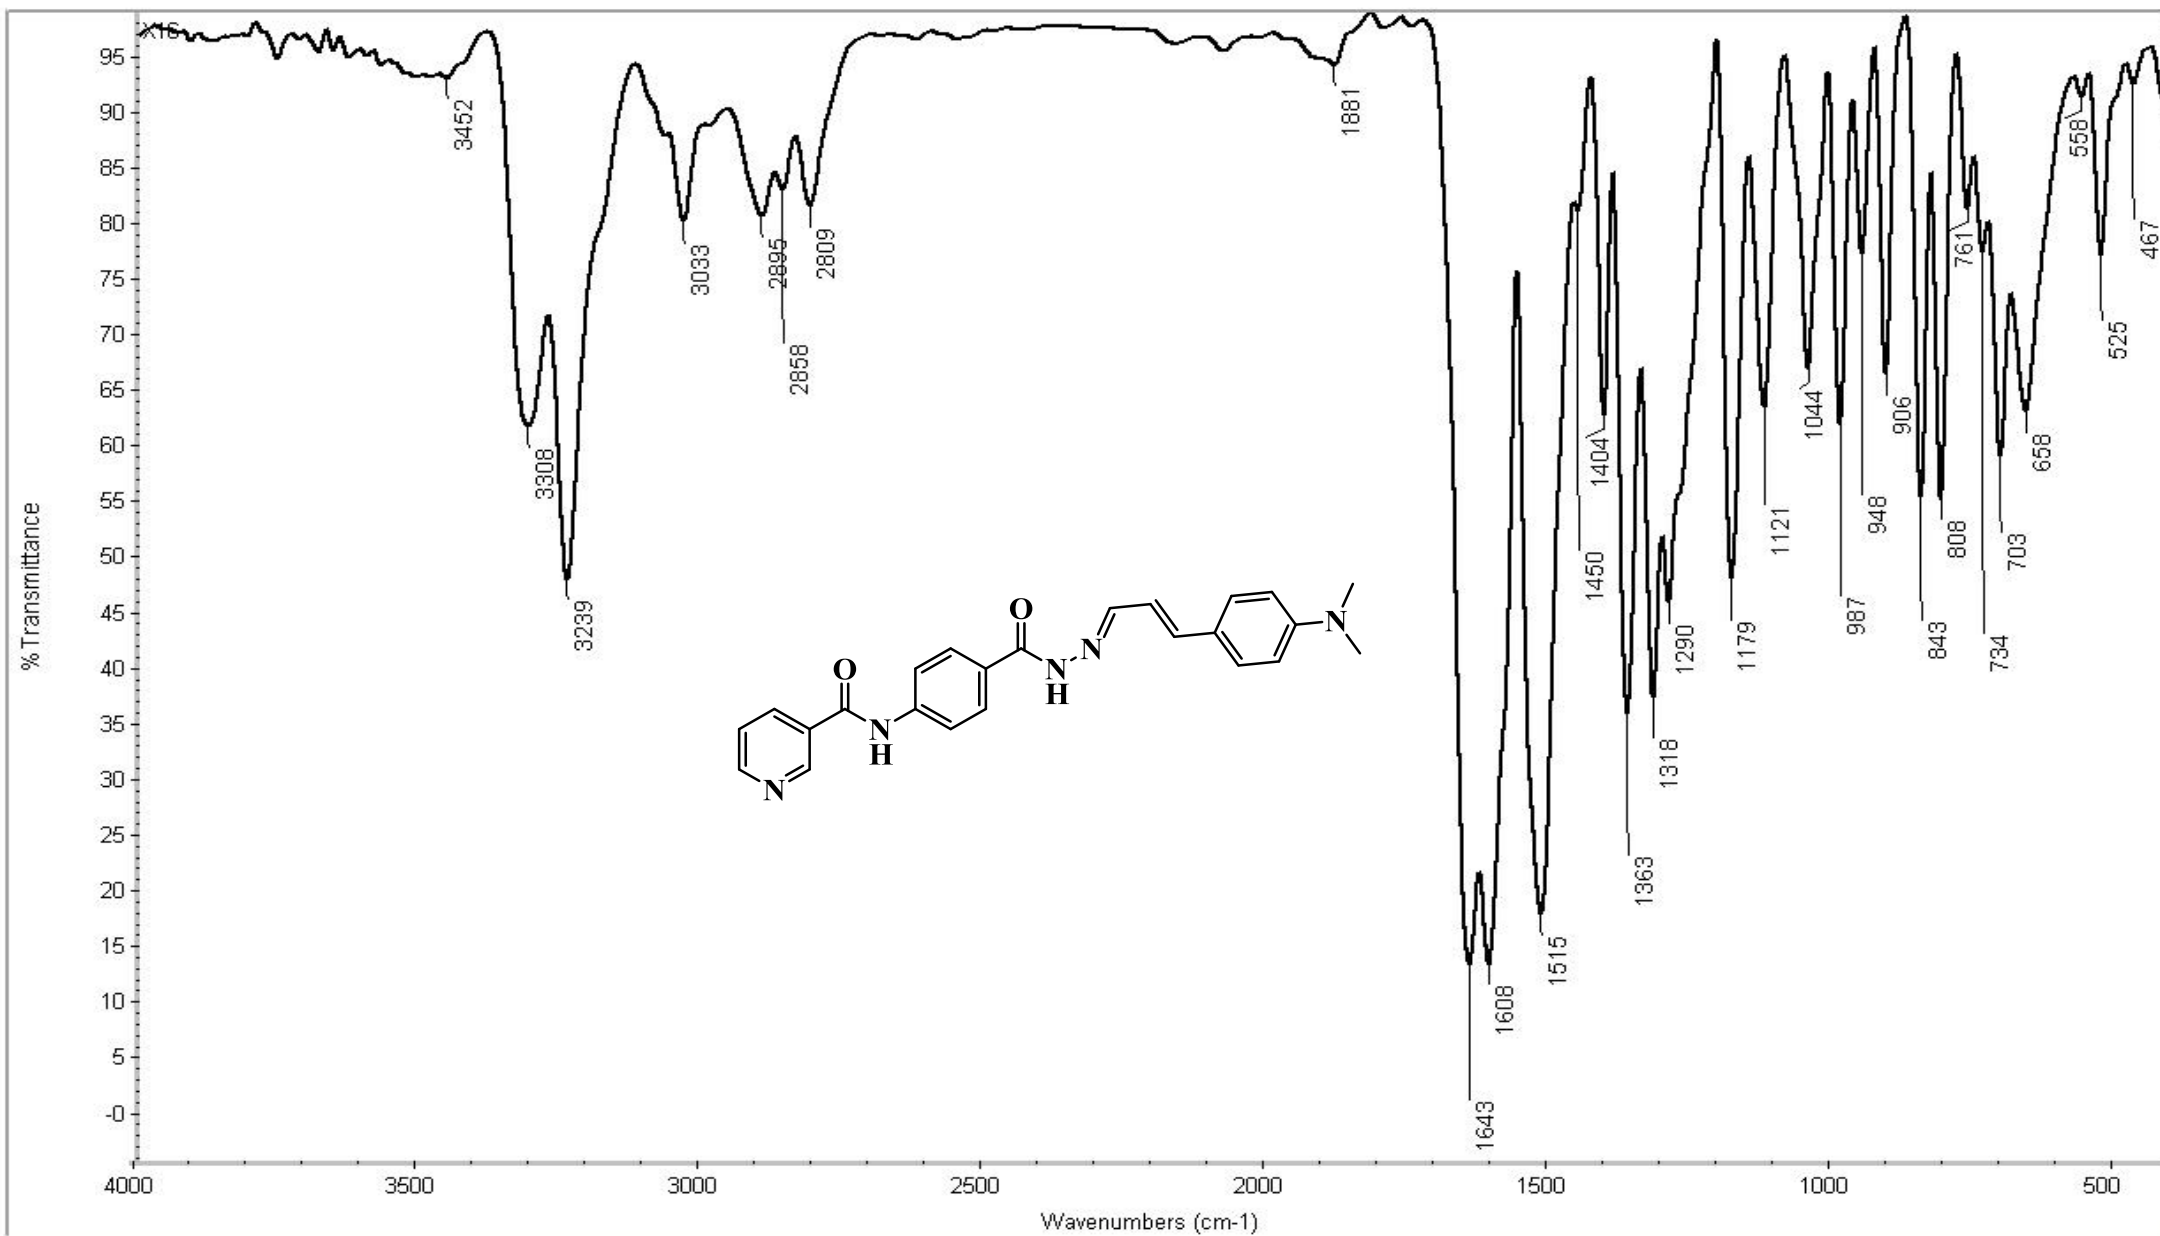



# **1H NMR of compound 8**

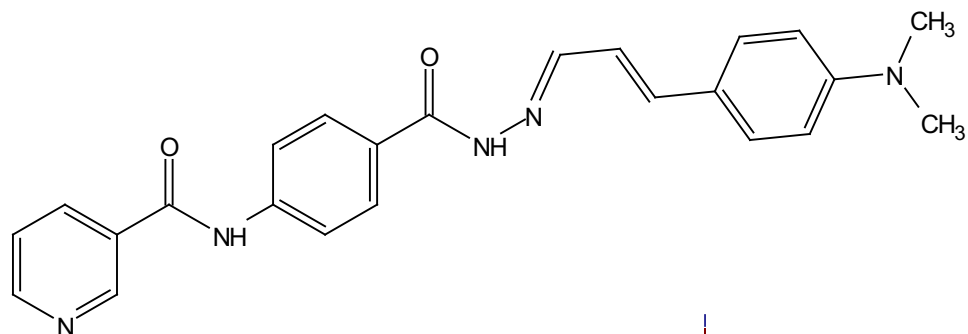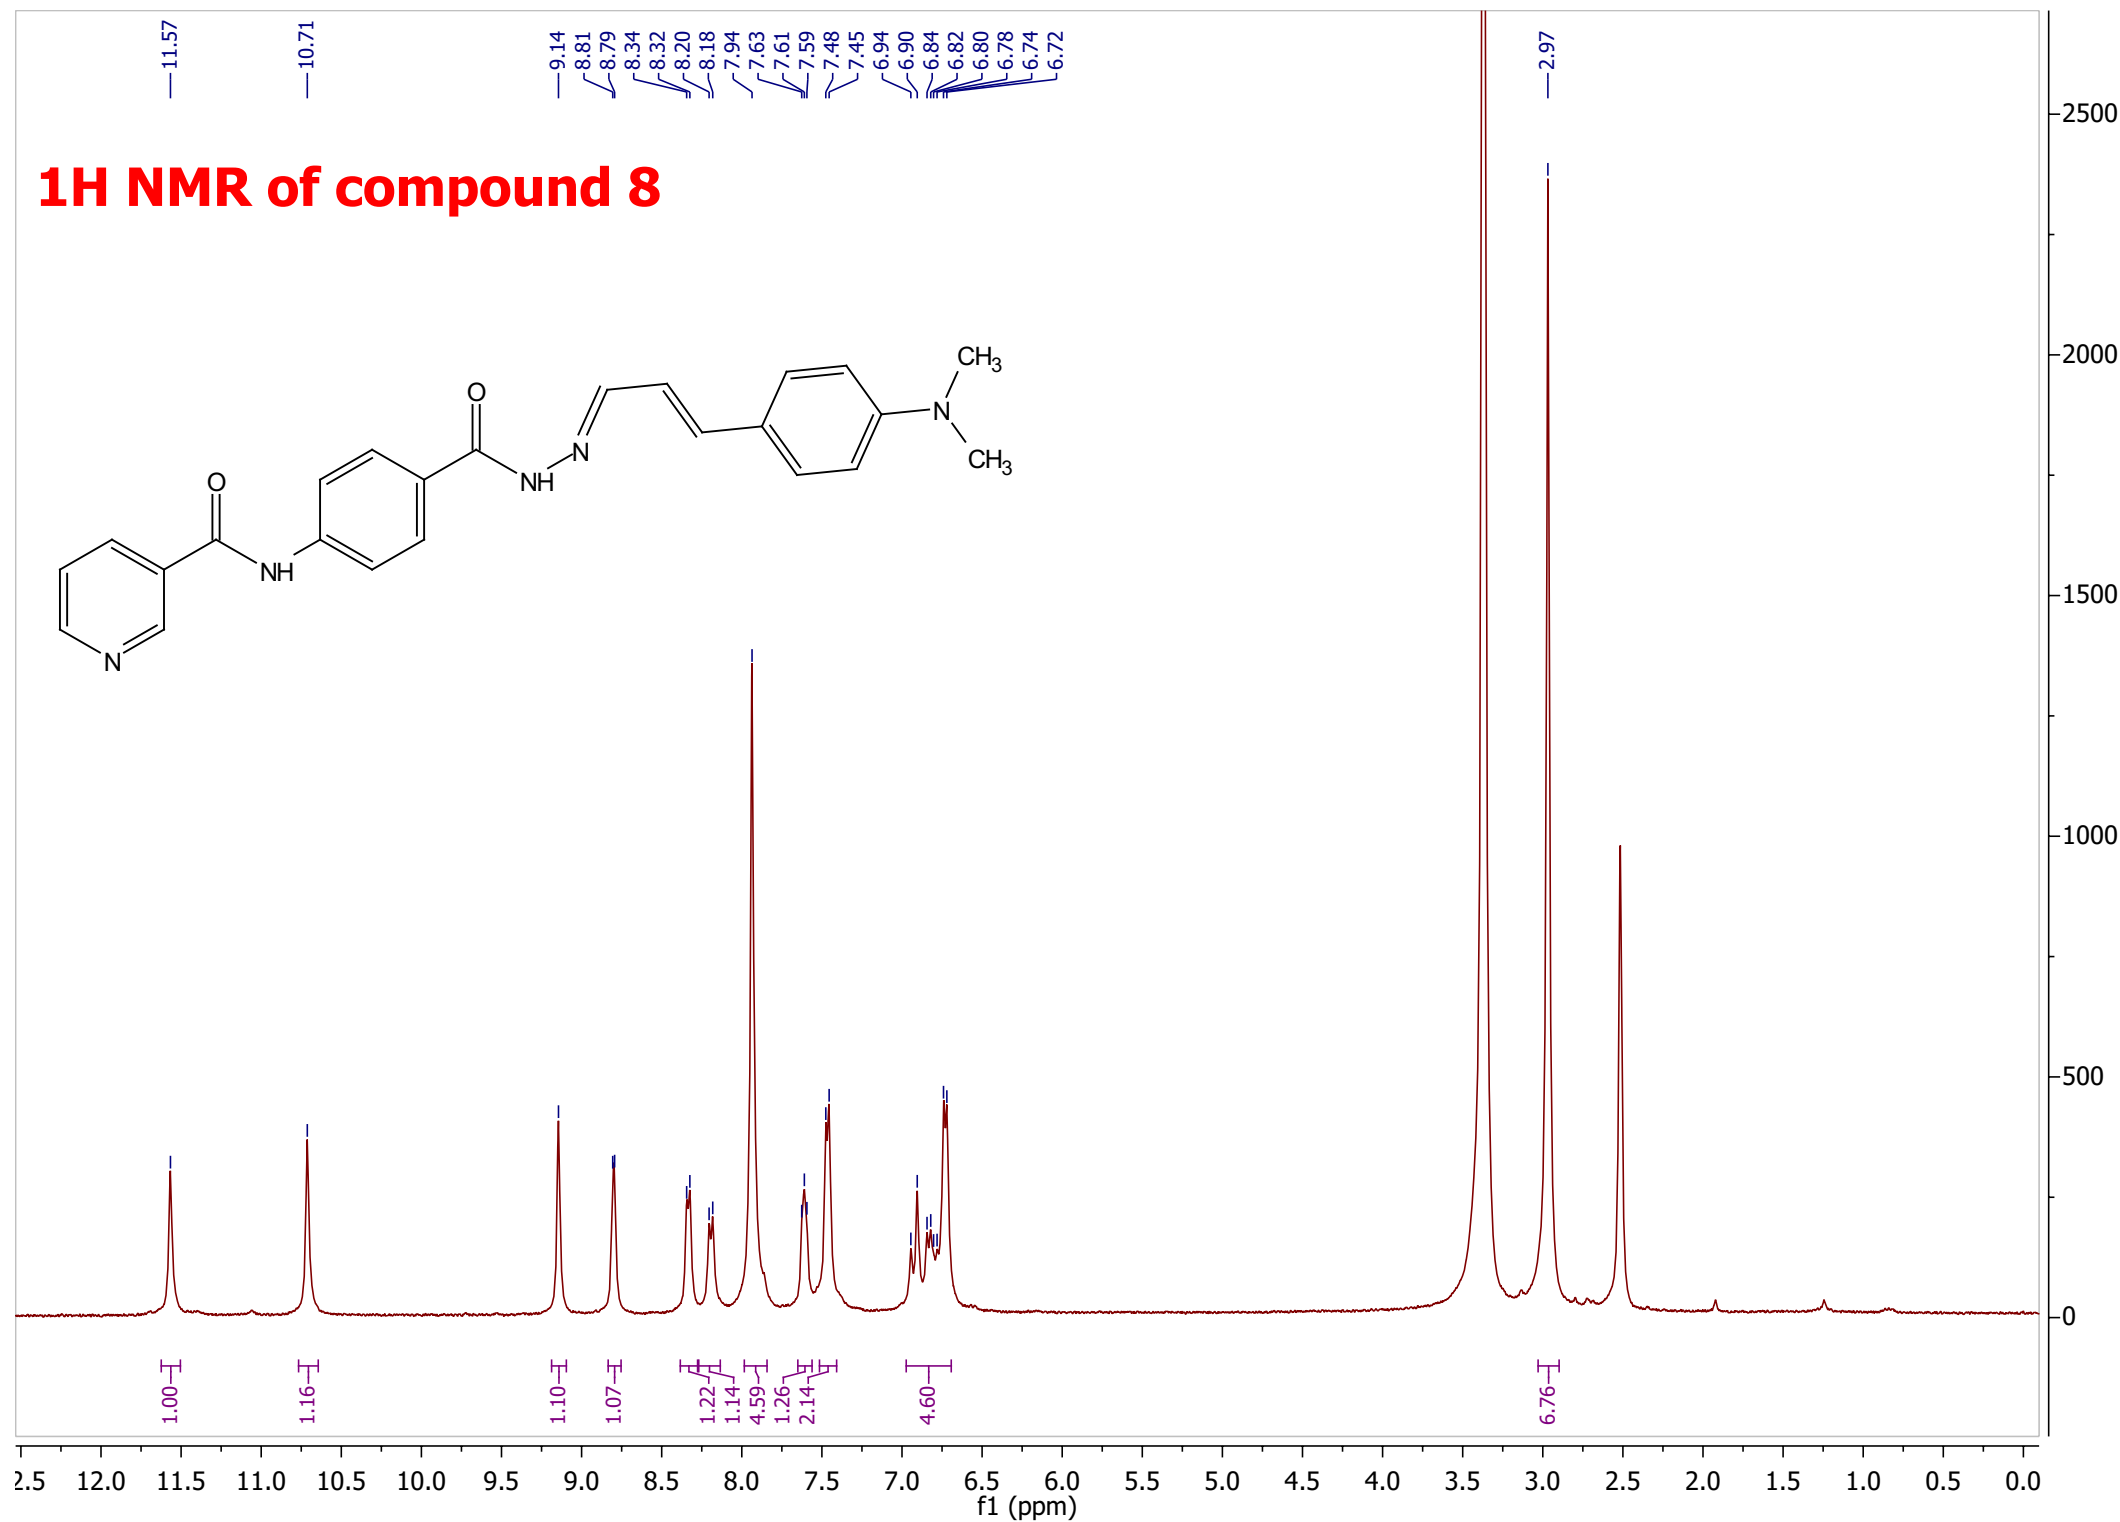



# **1H NMR of compound 8**

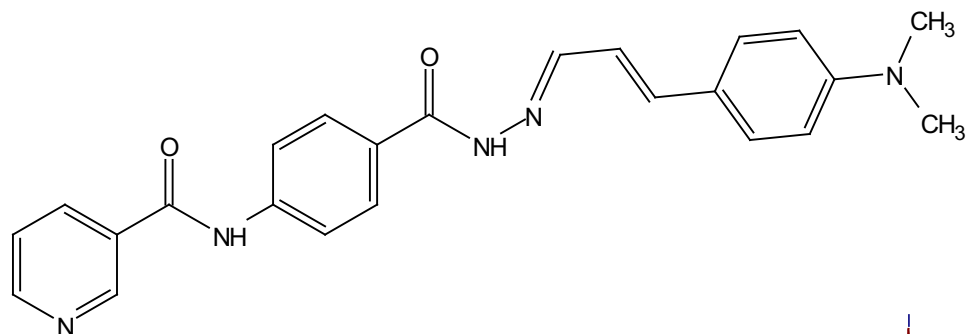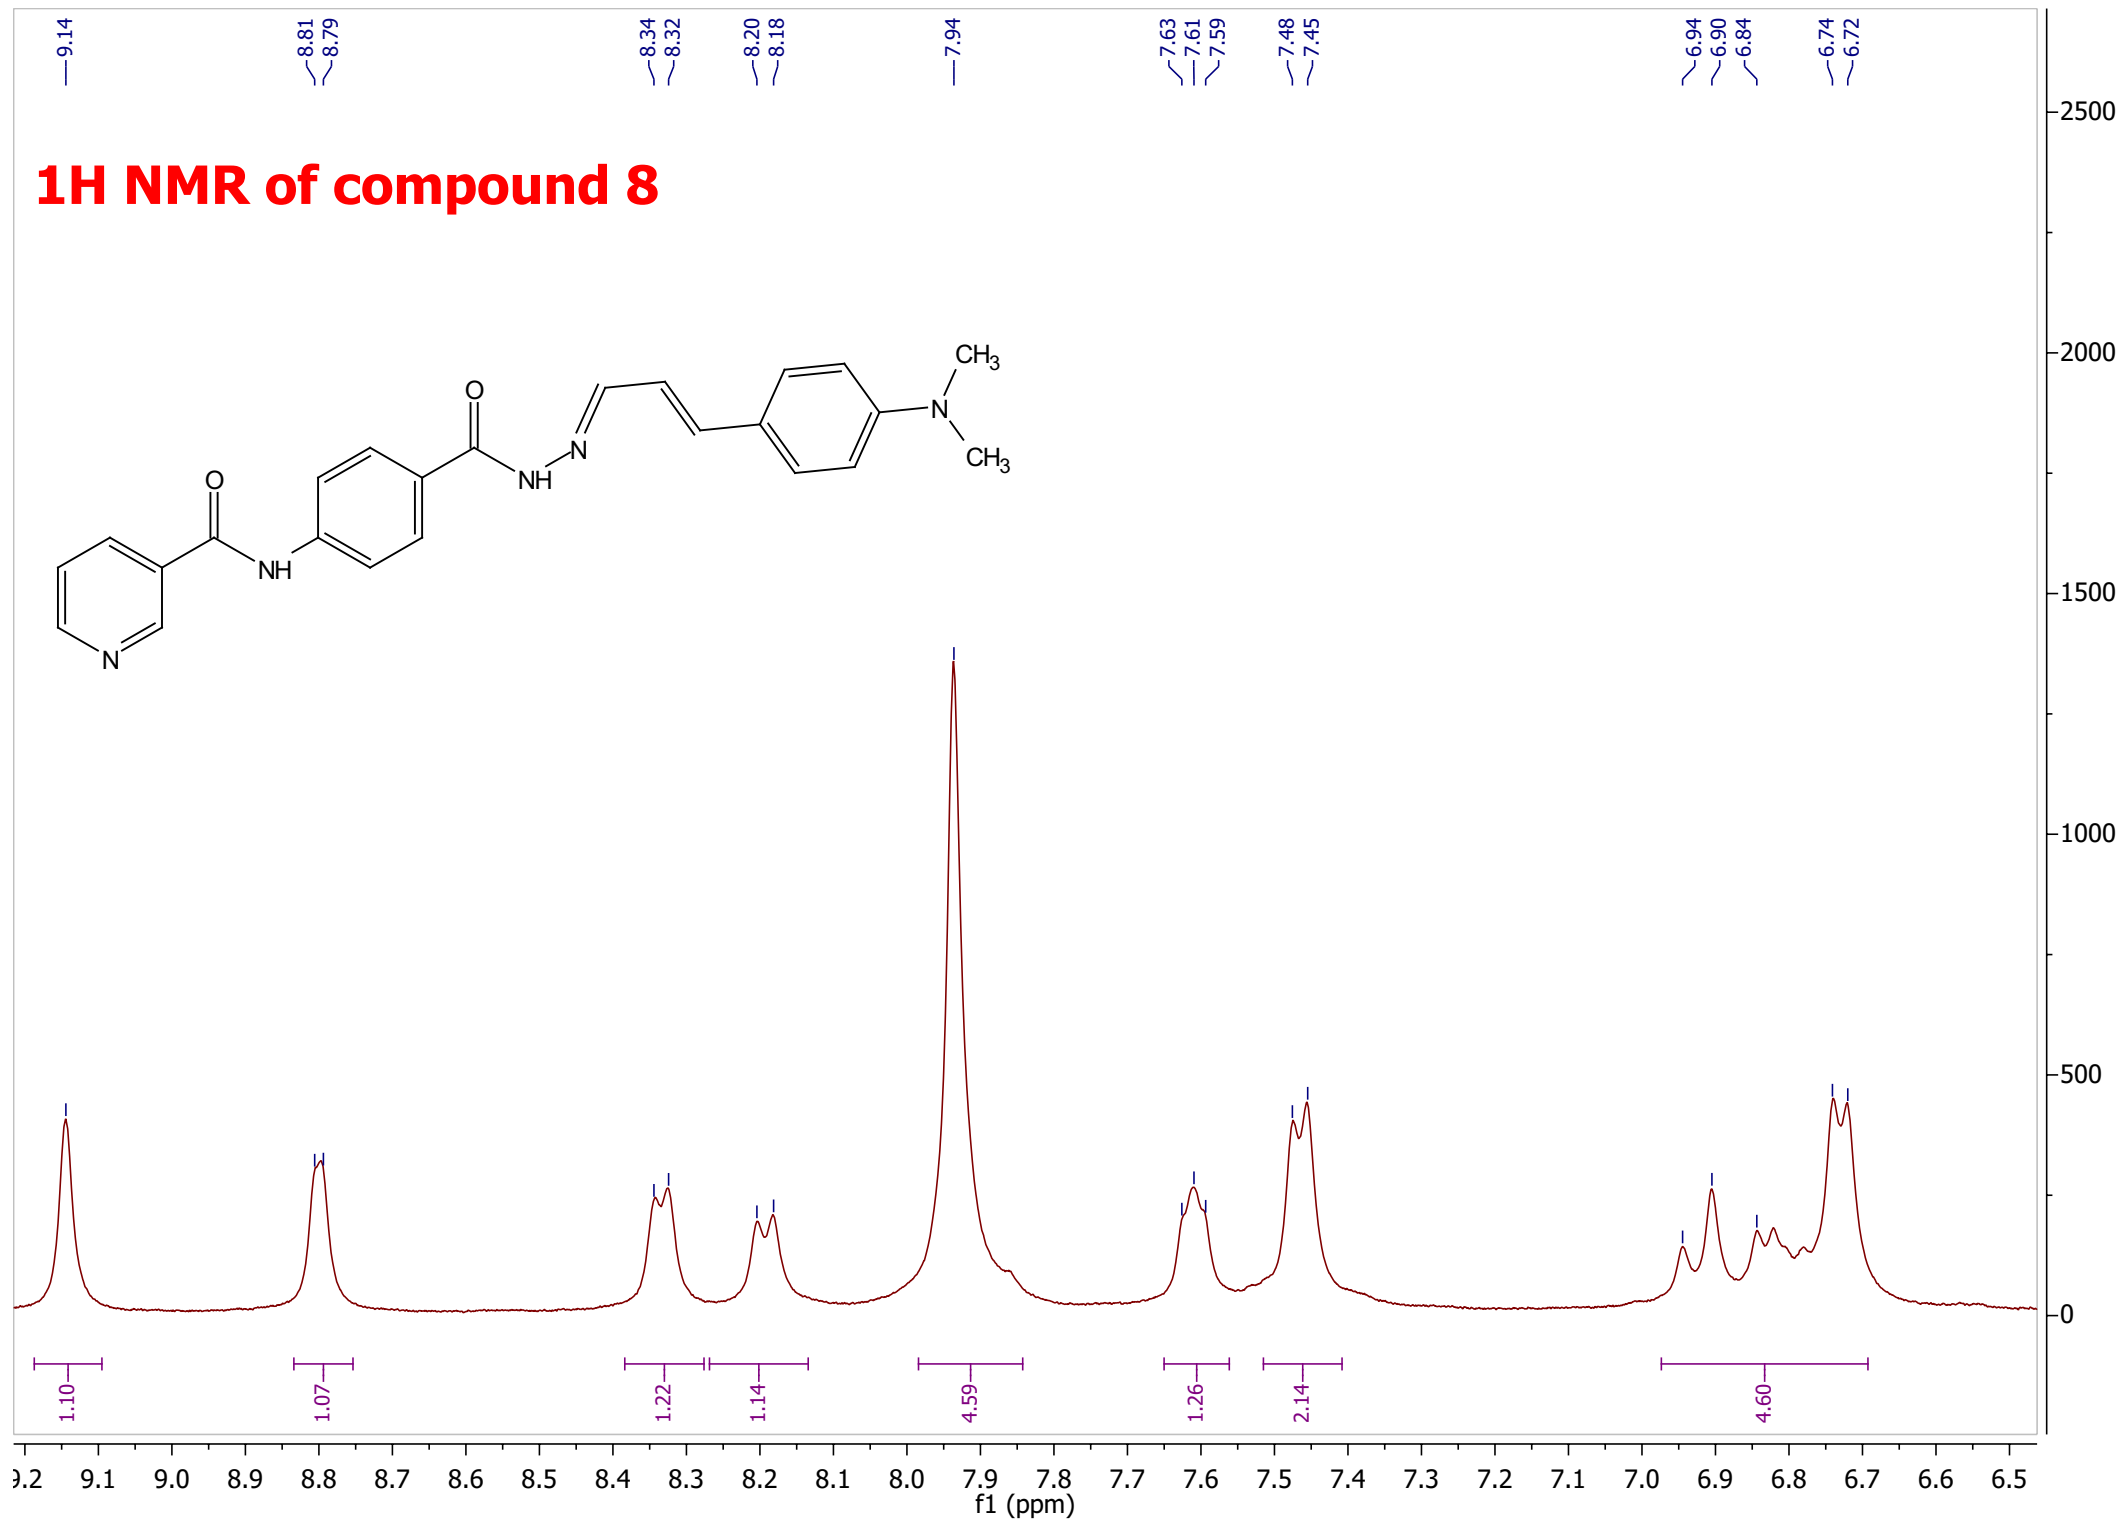



<sup>13</sup>C NMR of compound 8

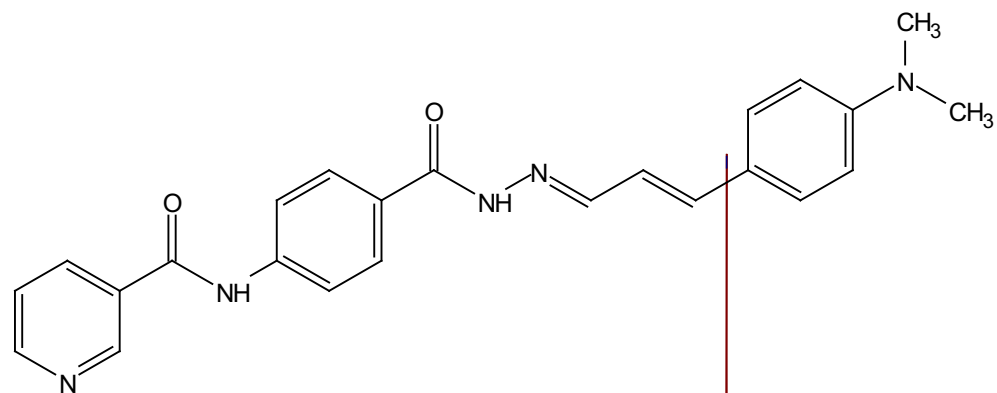

164.89  
162.58  
152.82  
152.14  
151.16  
150.89  
149.23  
144.29  
142.29  
140.19  
138.74  
136.08  
133.38  
130.85  
129.09  
128.89  
124.13  
124.05  
121.05  
120.01  
112.49

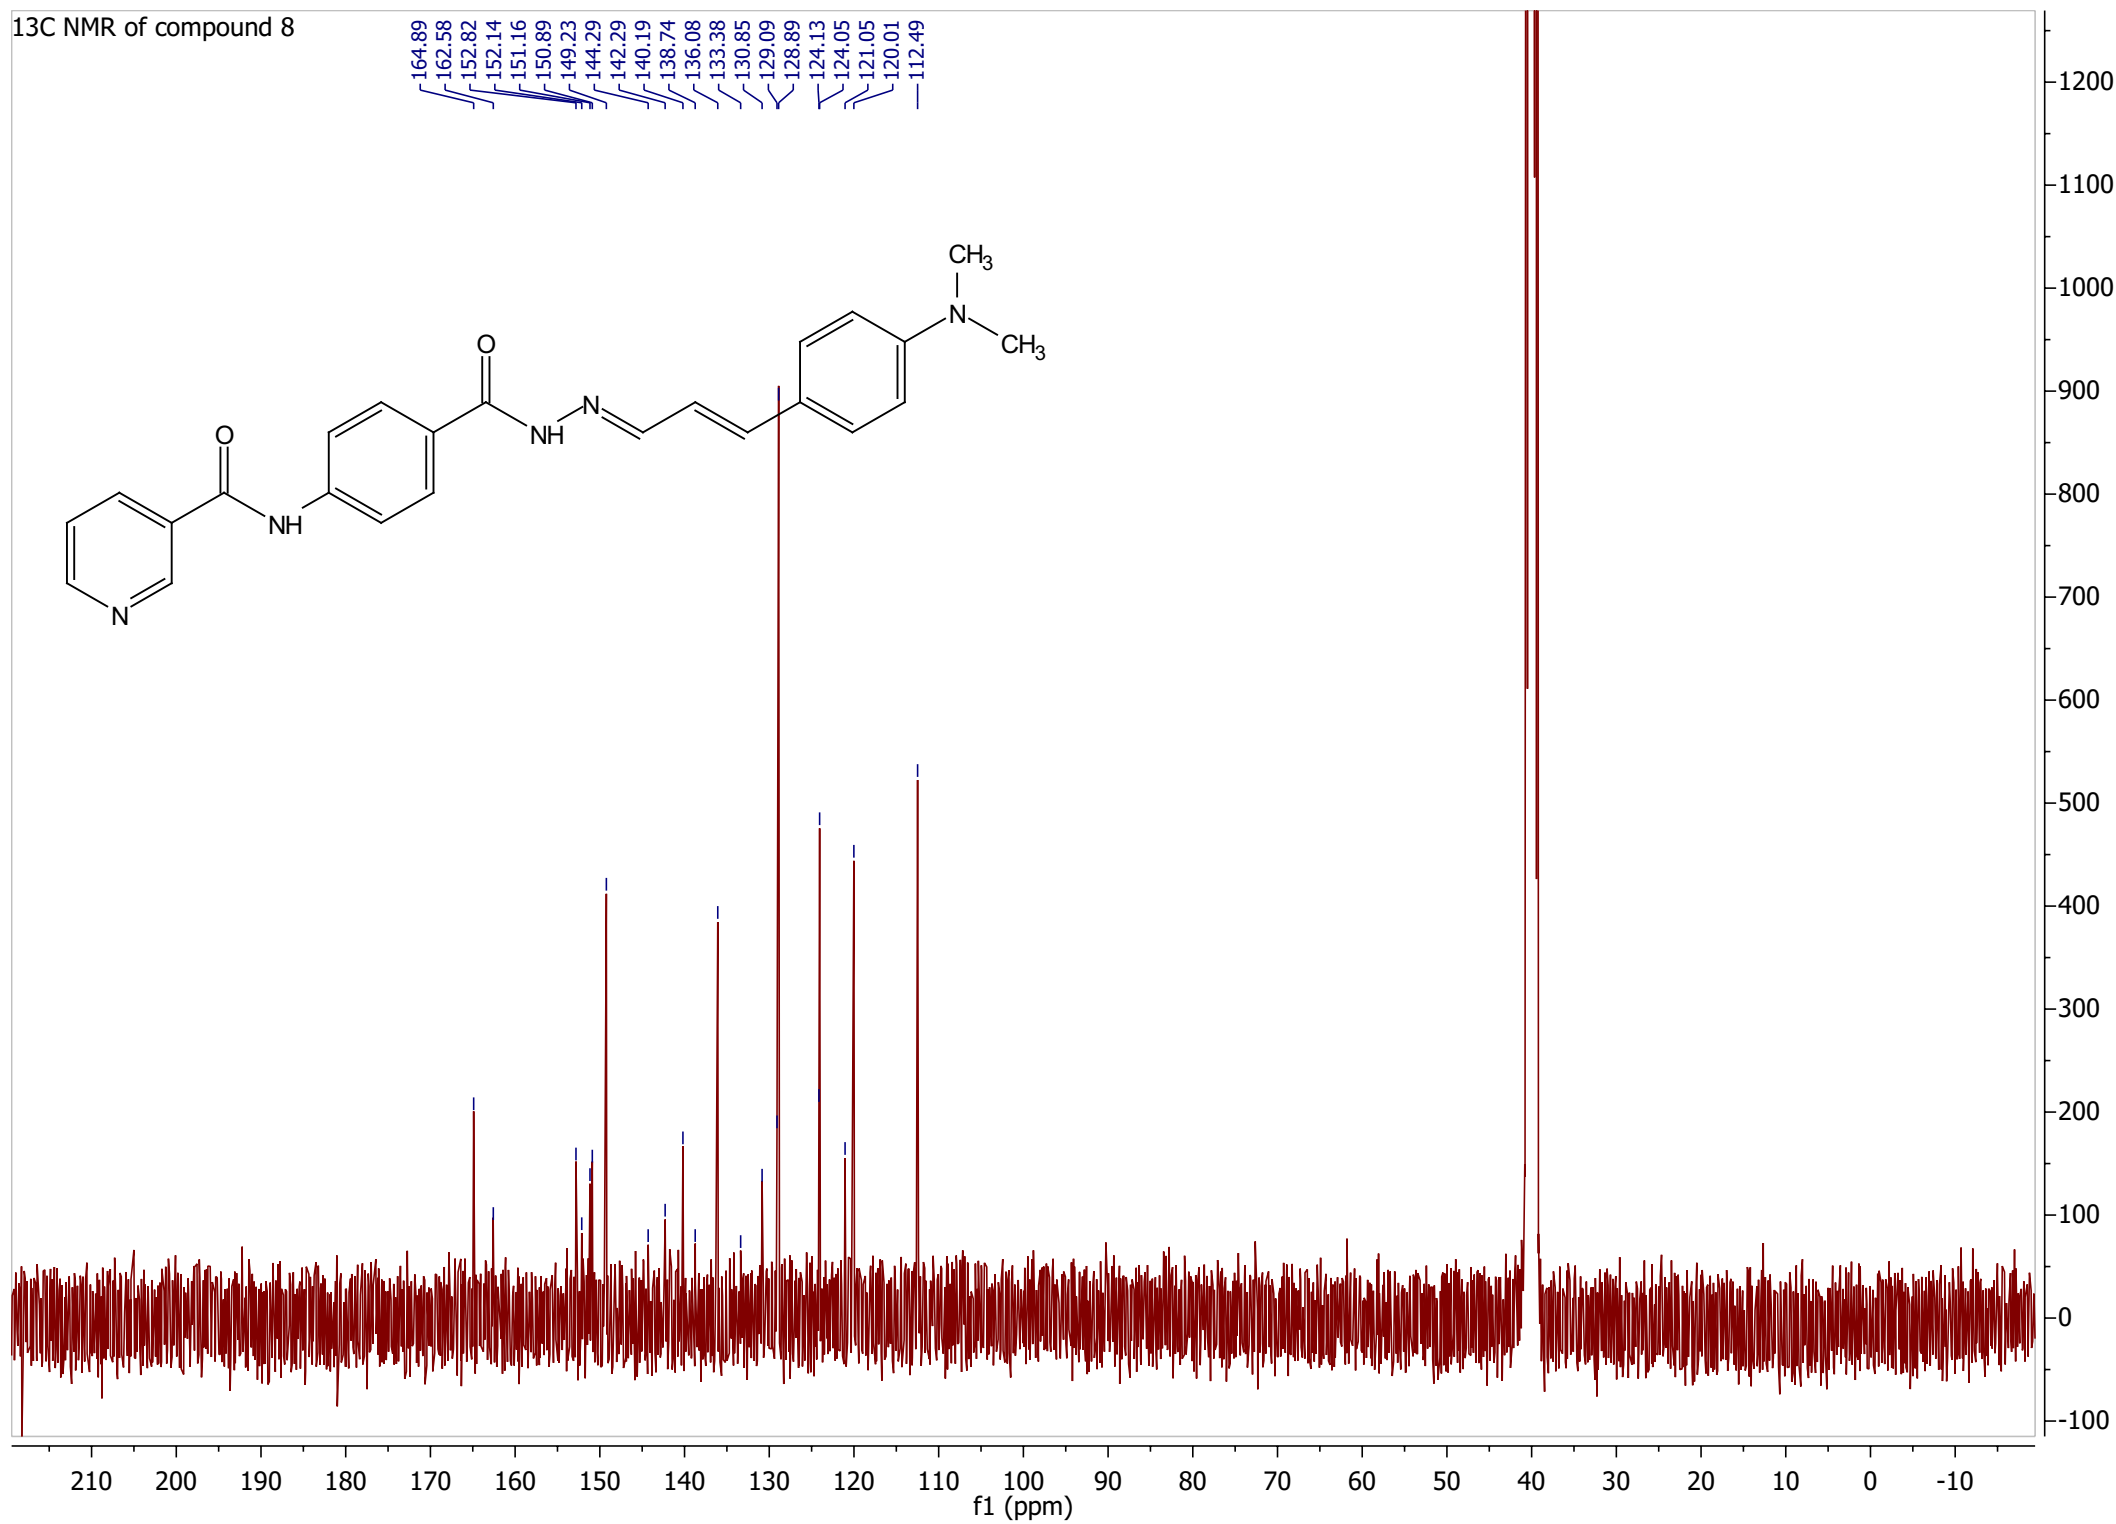



<sup>13</sup>C NMR of compound 8

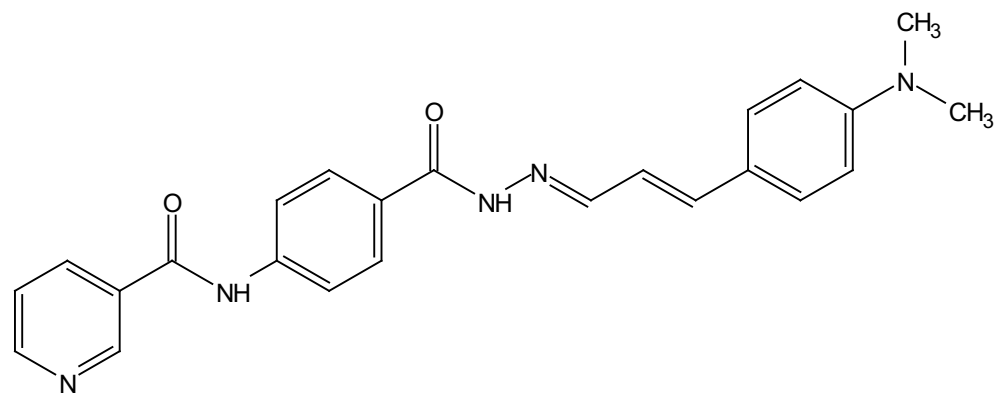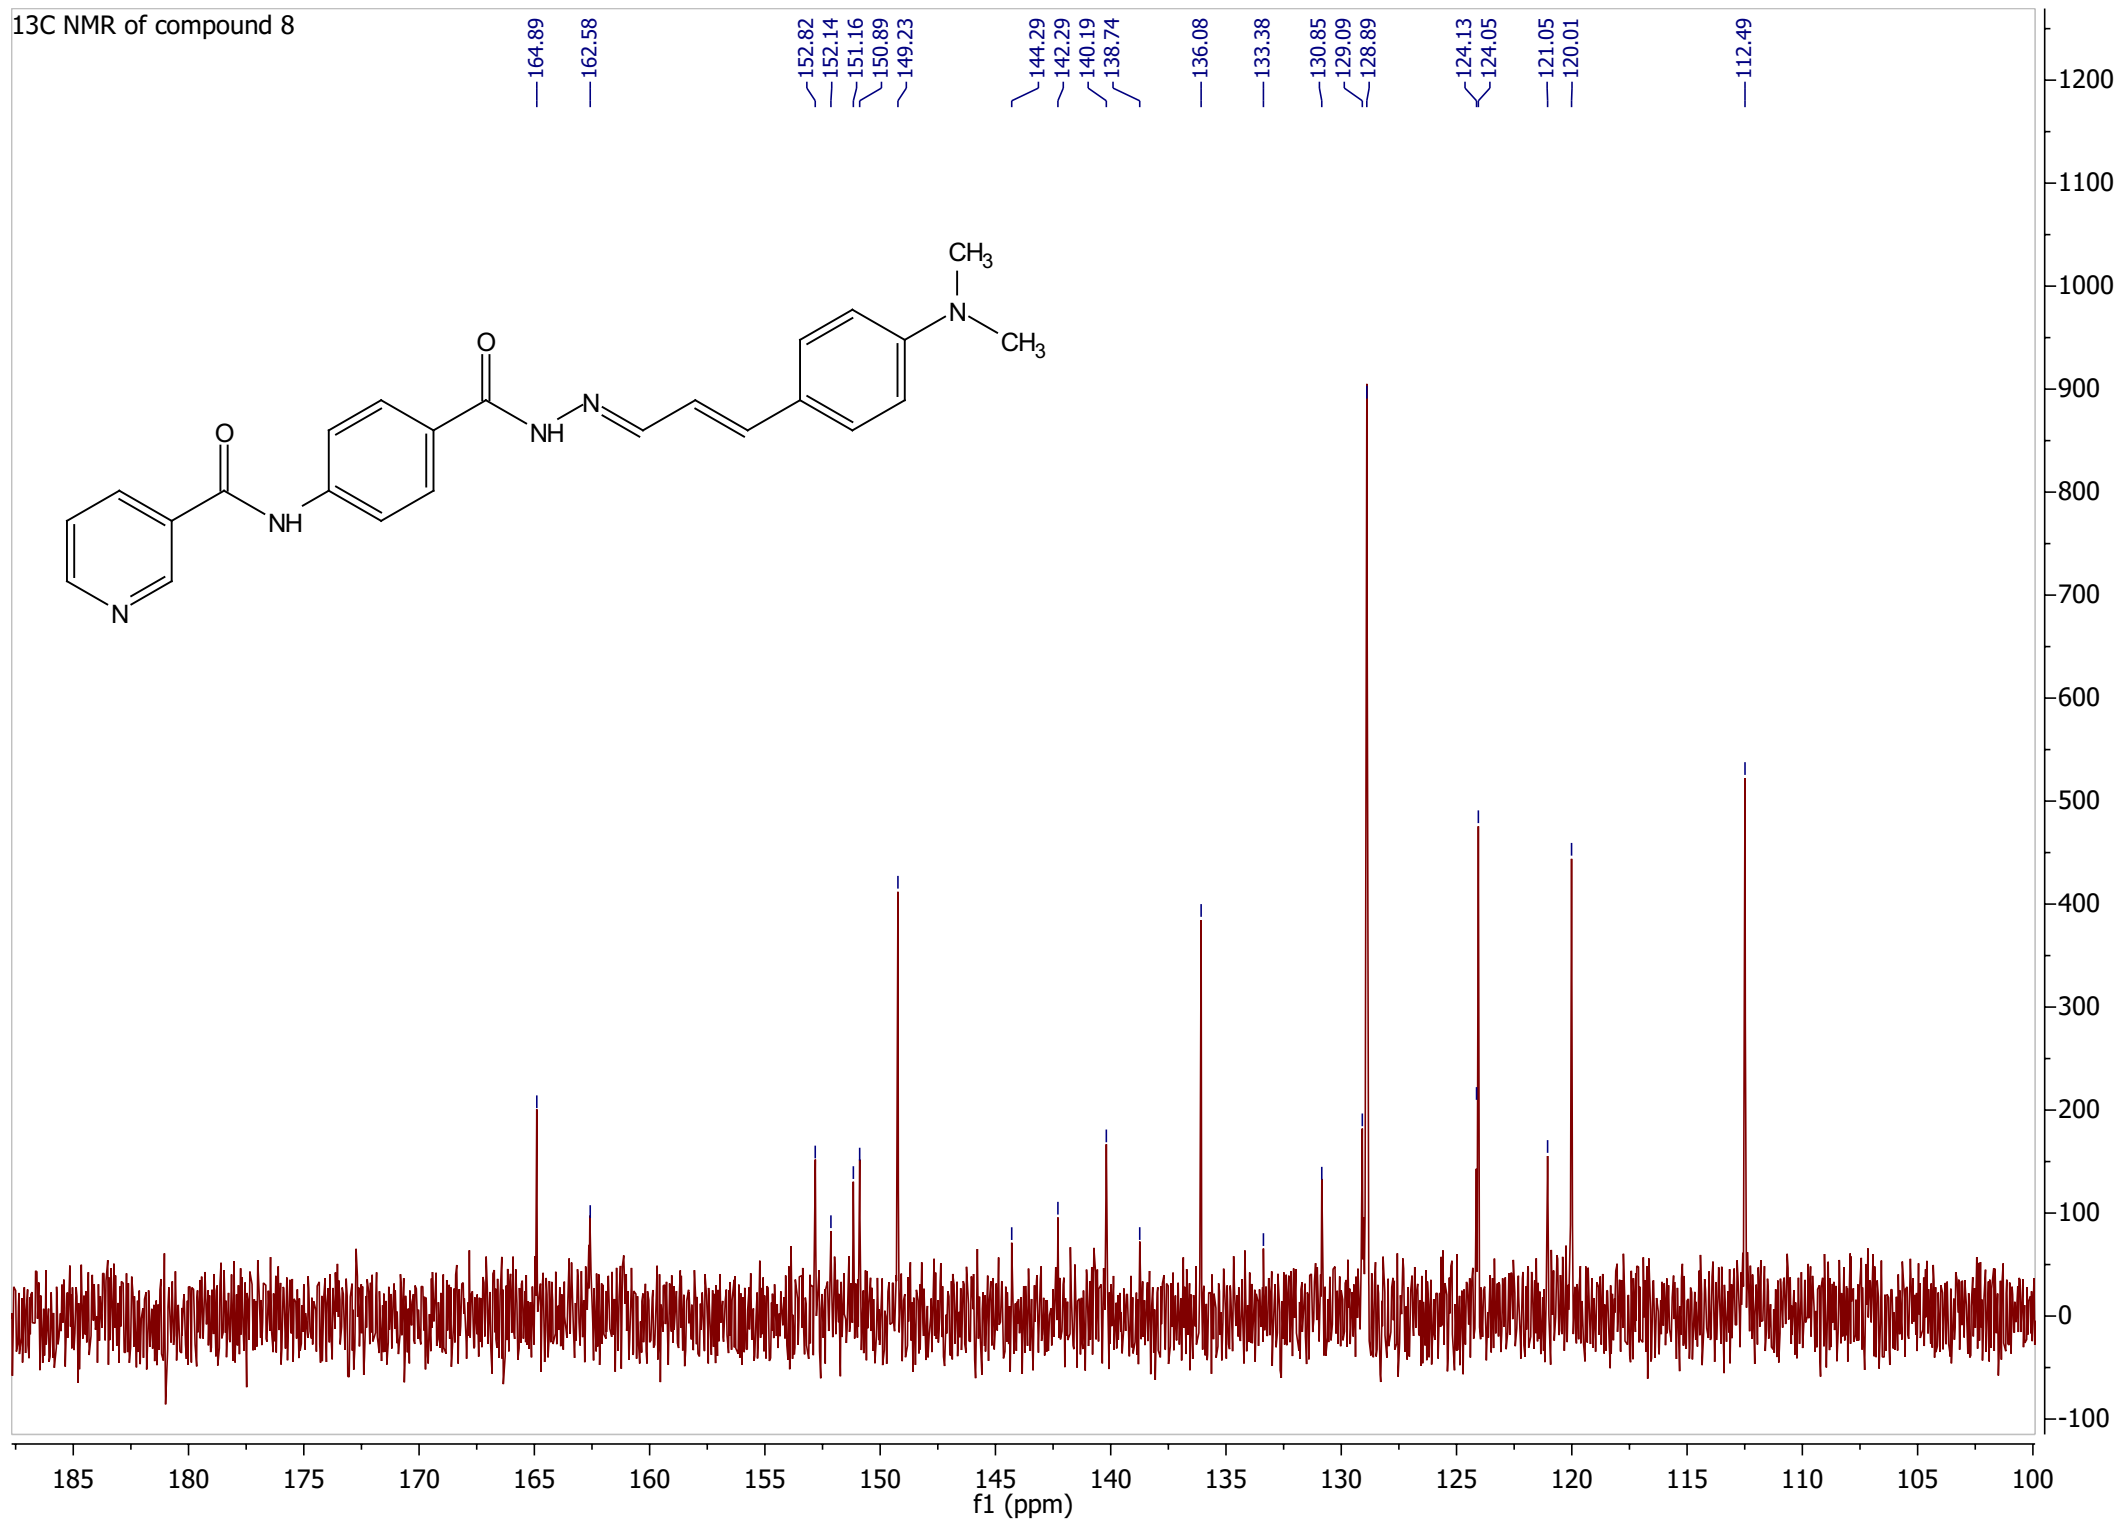



# IR of compound 11

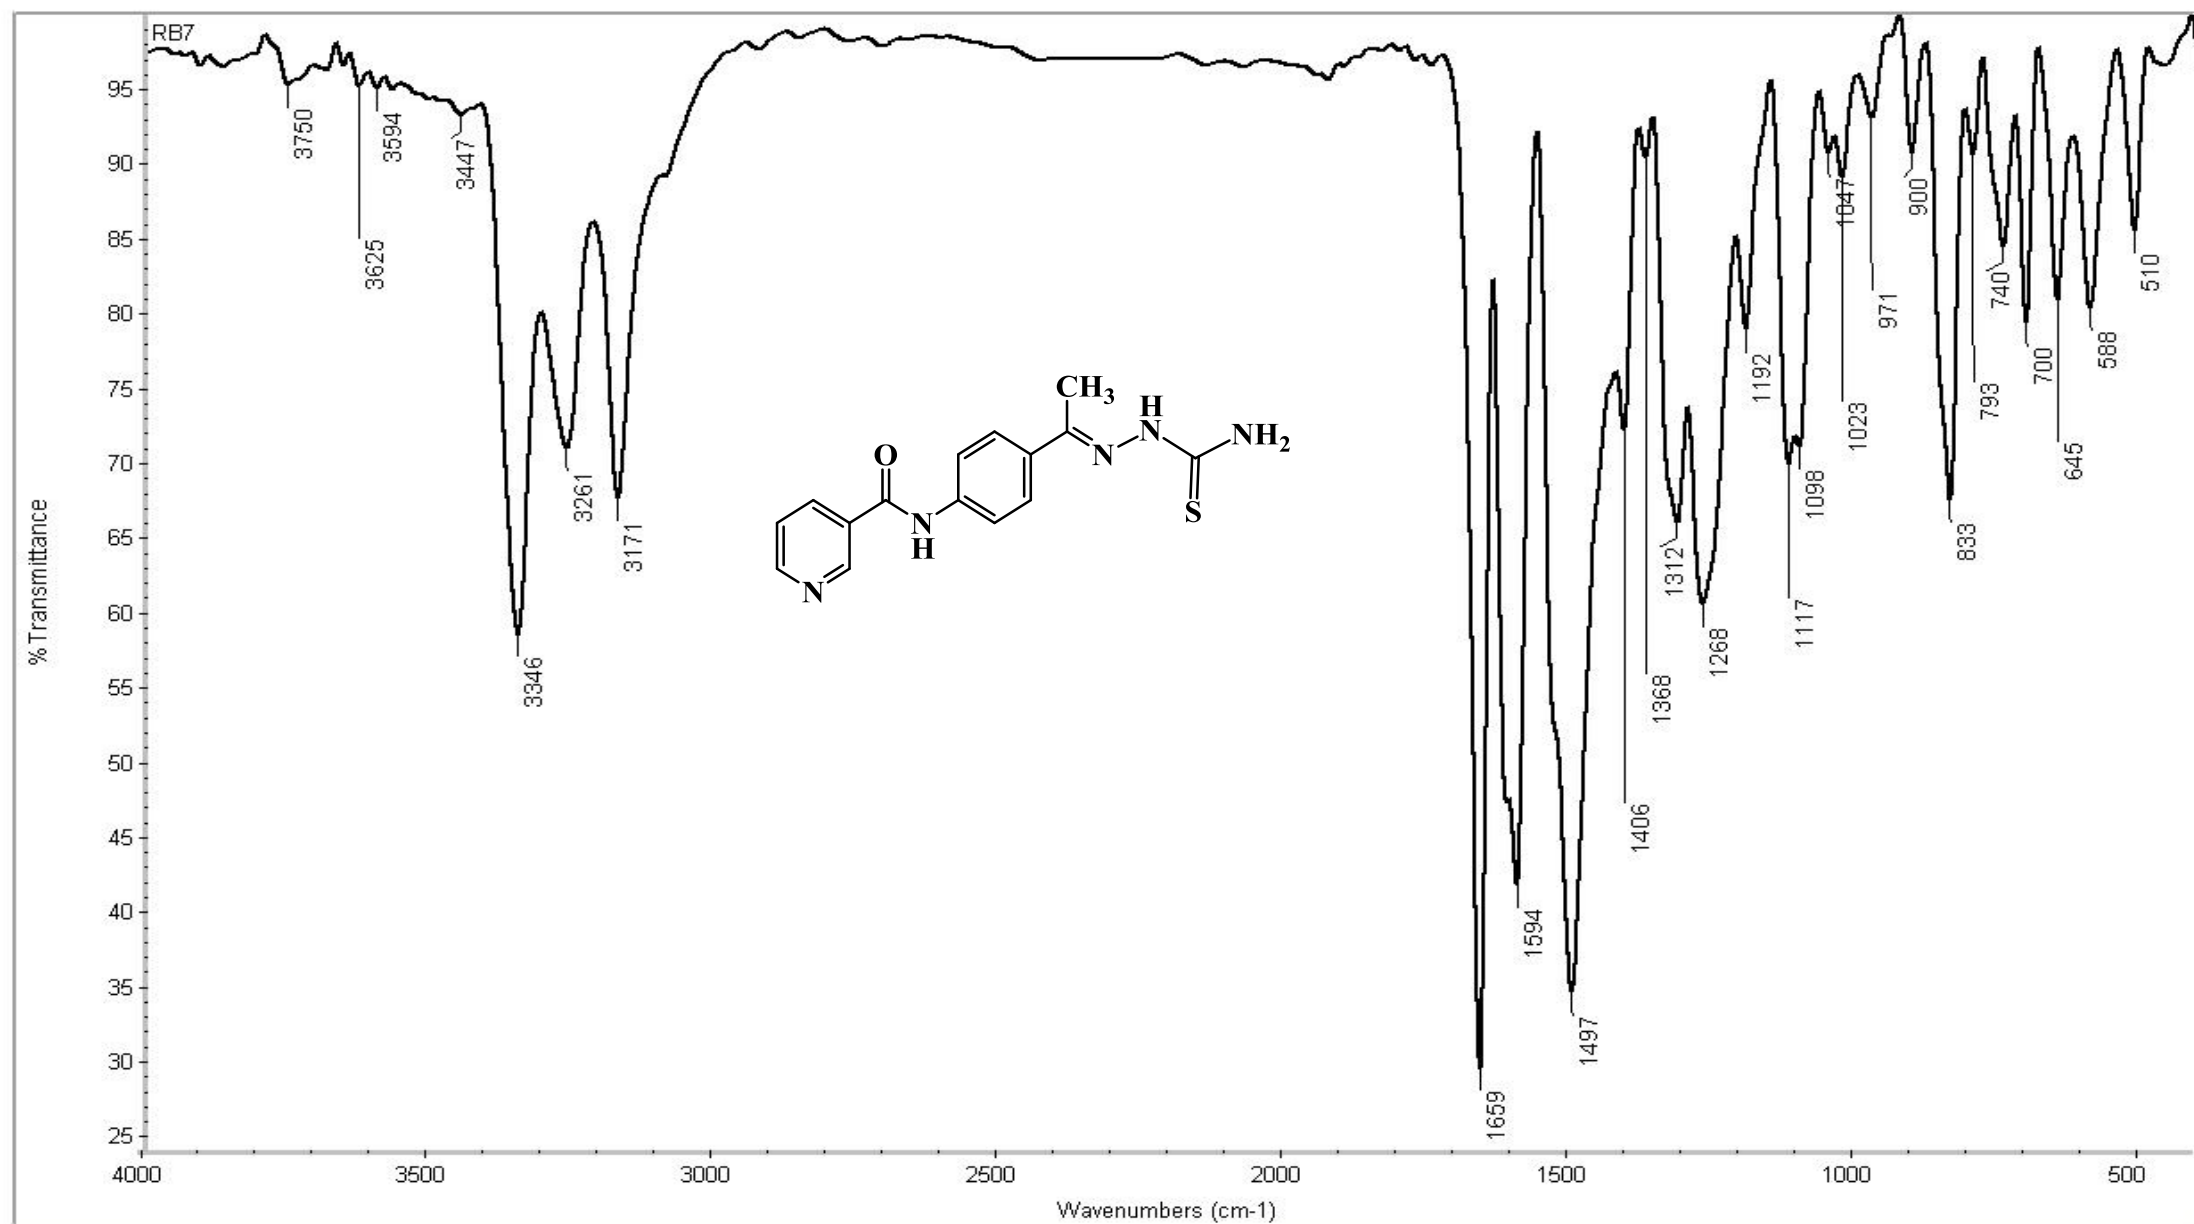



# **1H NMR of compound 11**

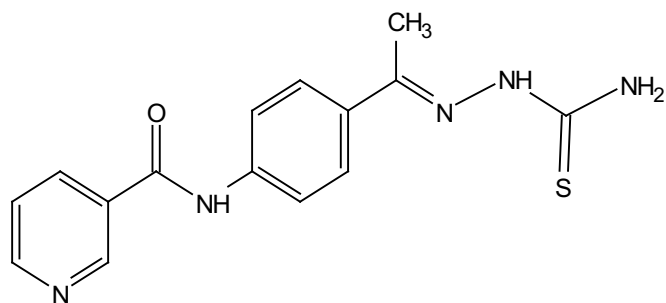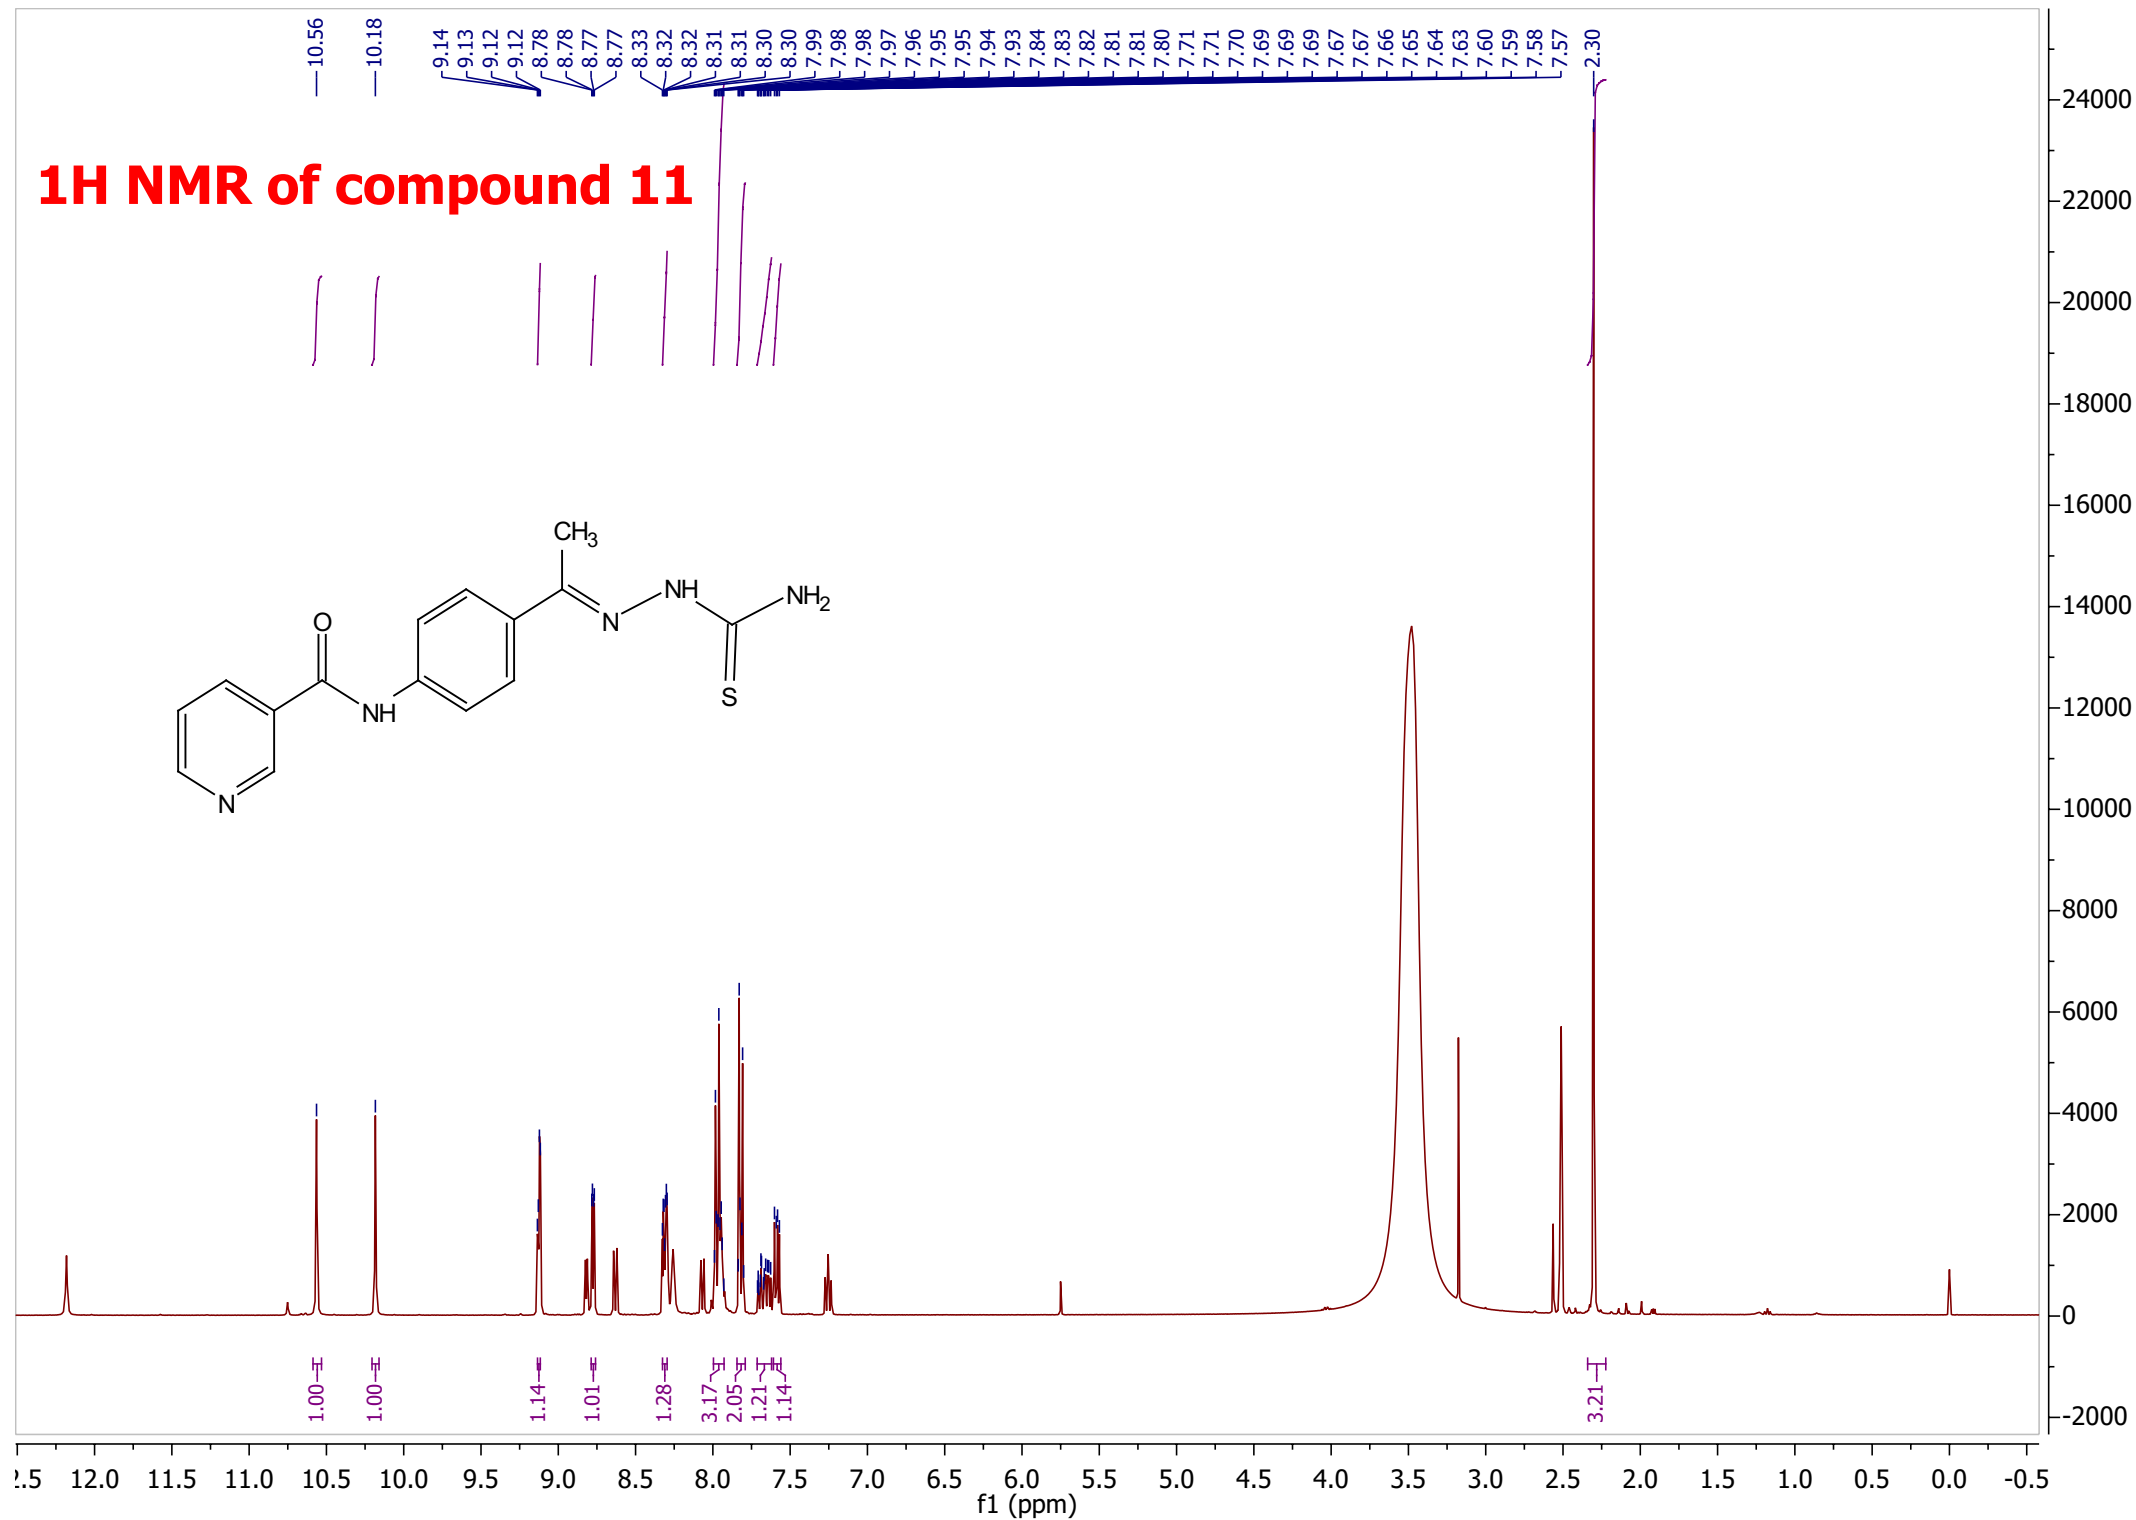



<sup>13</sup>C NMR of compound 11

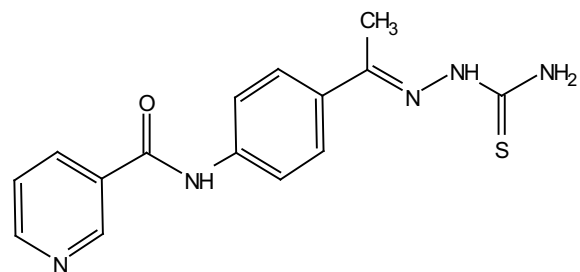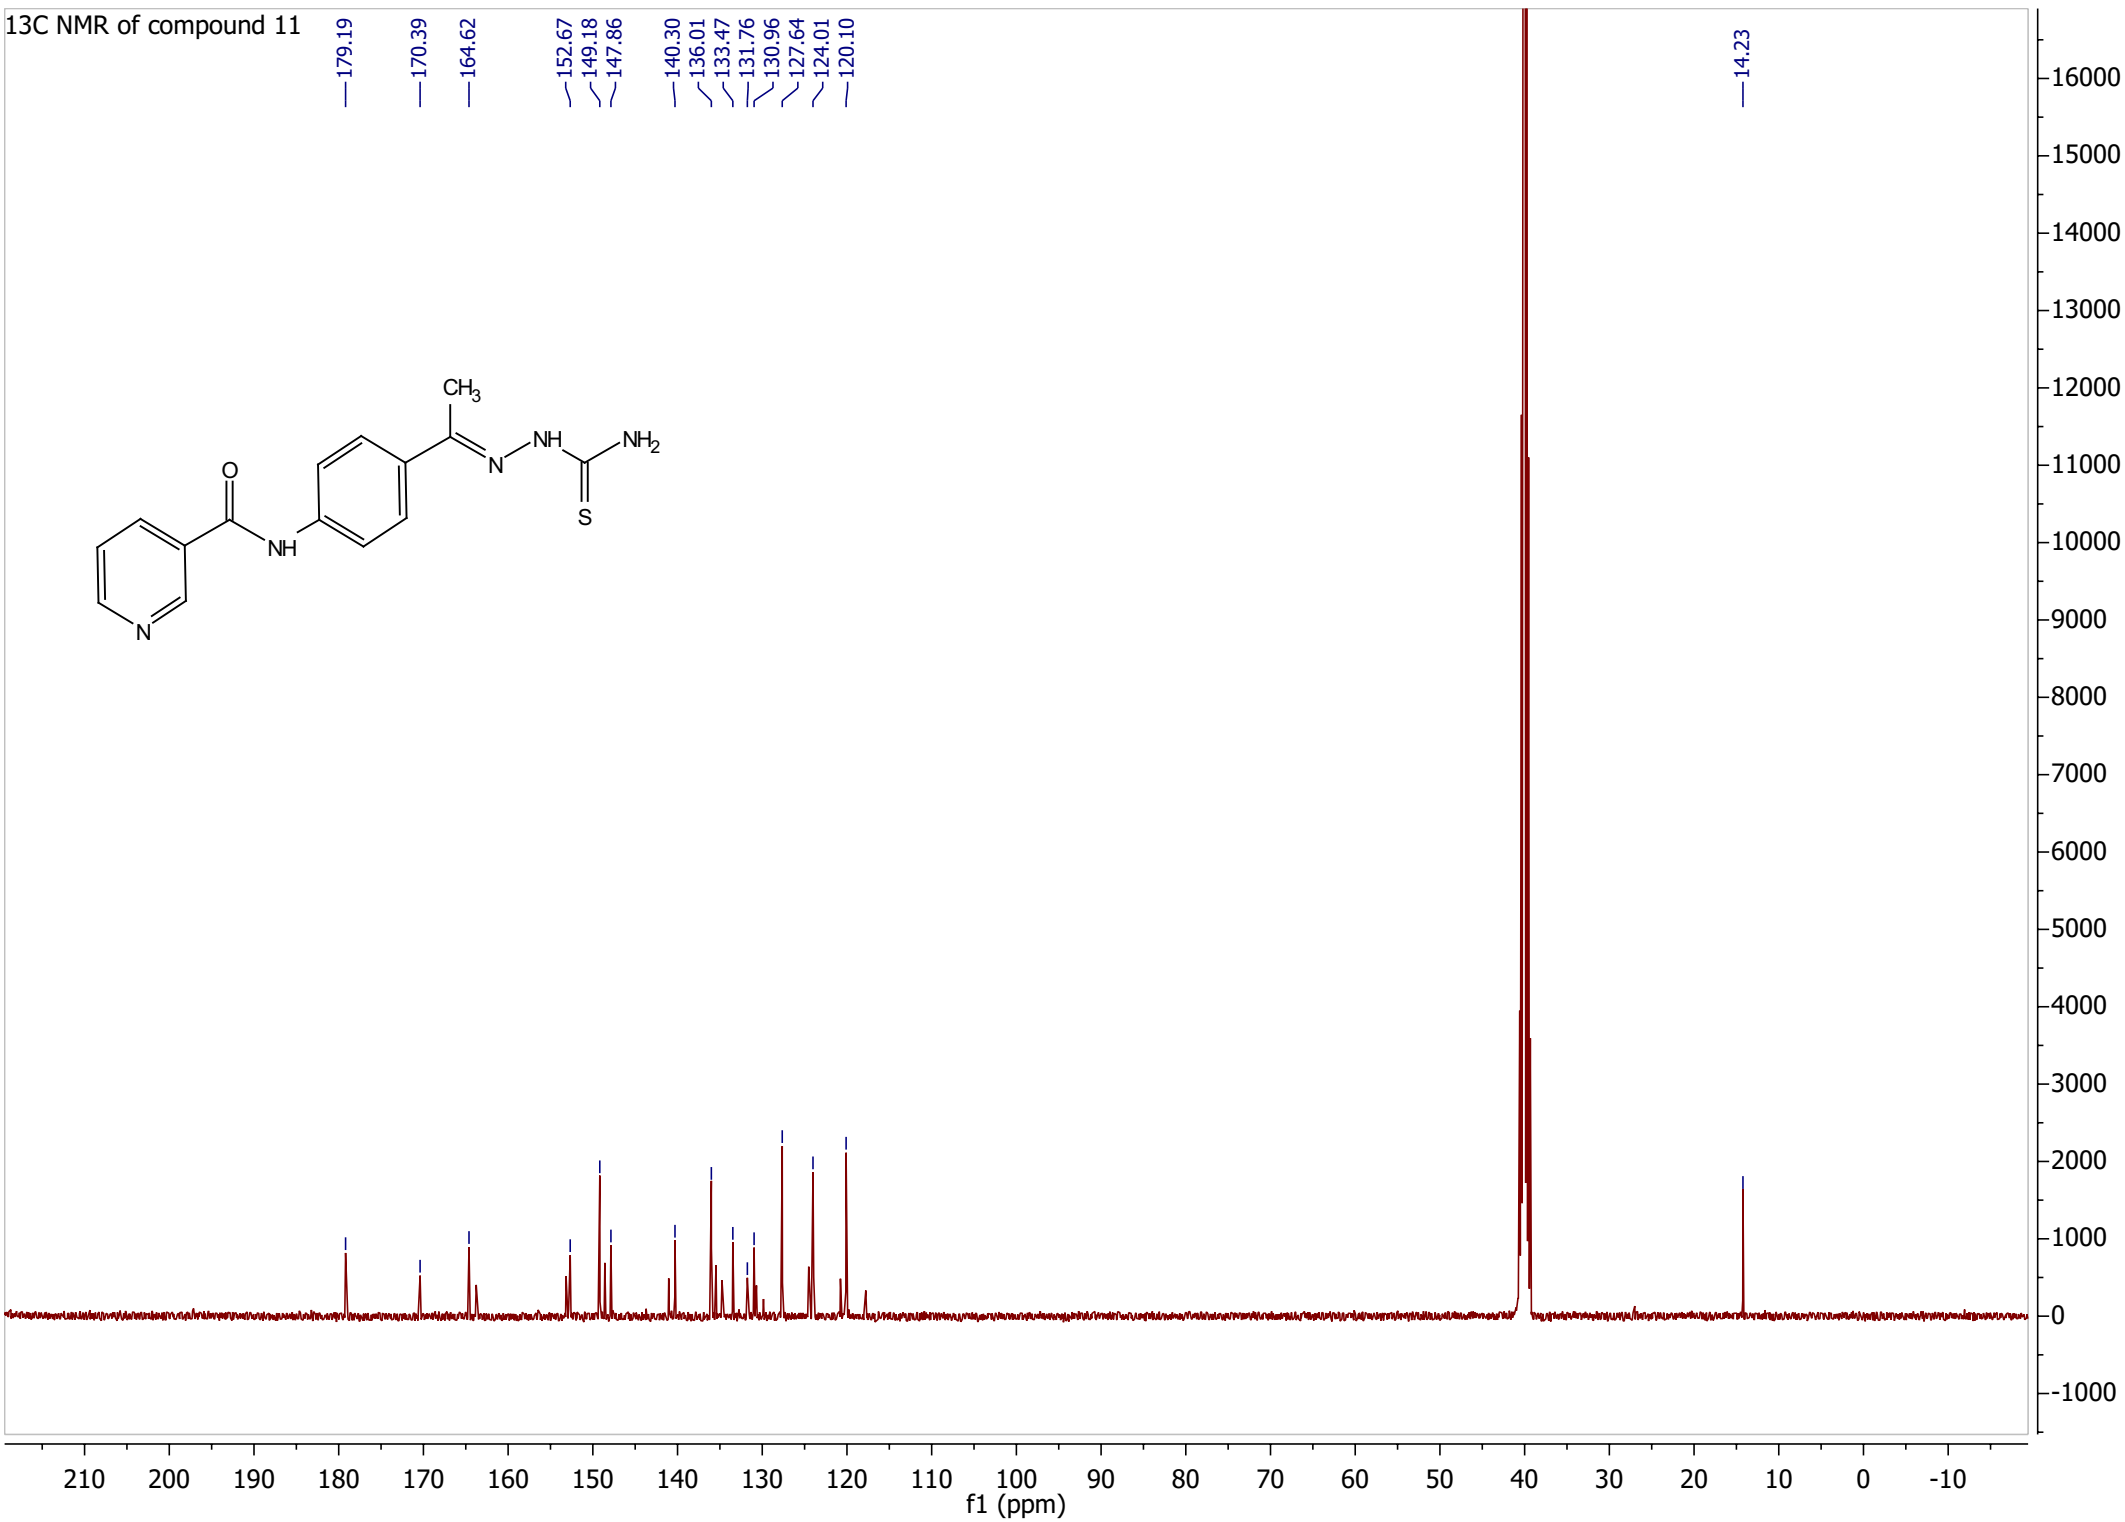



# IR of compound 12

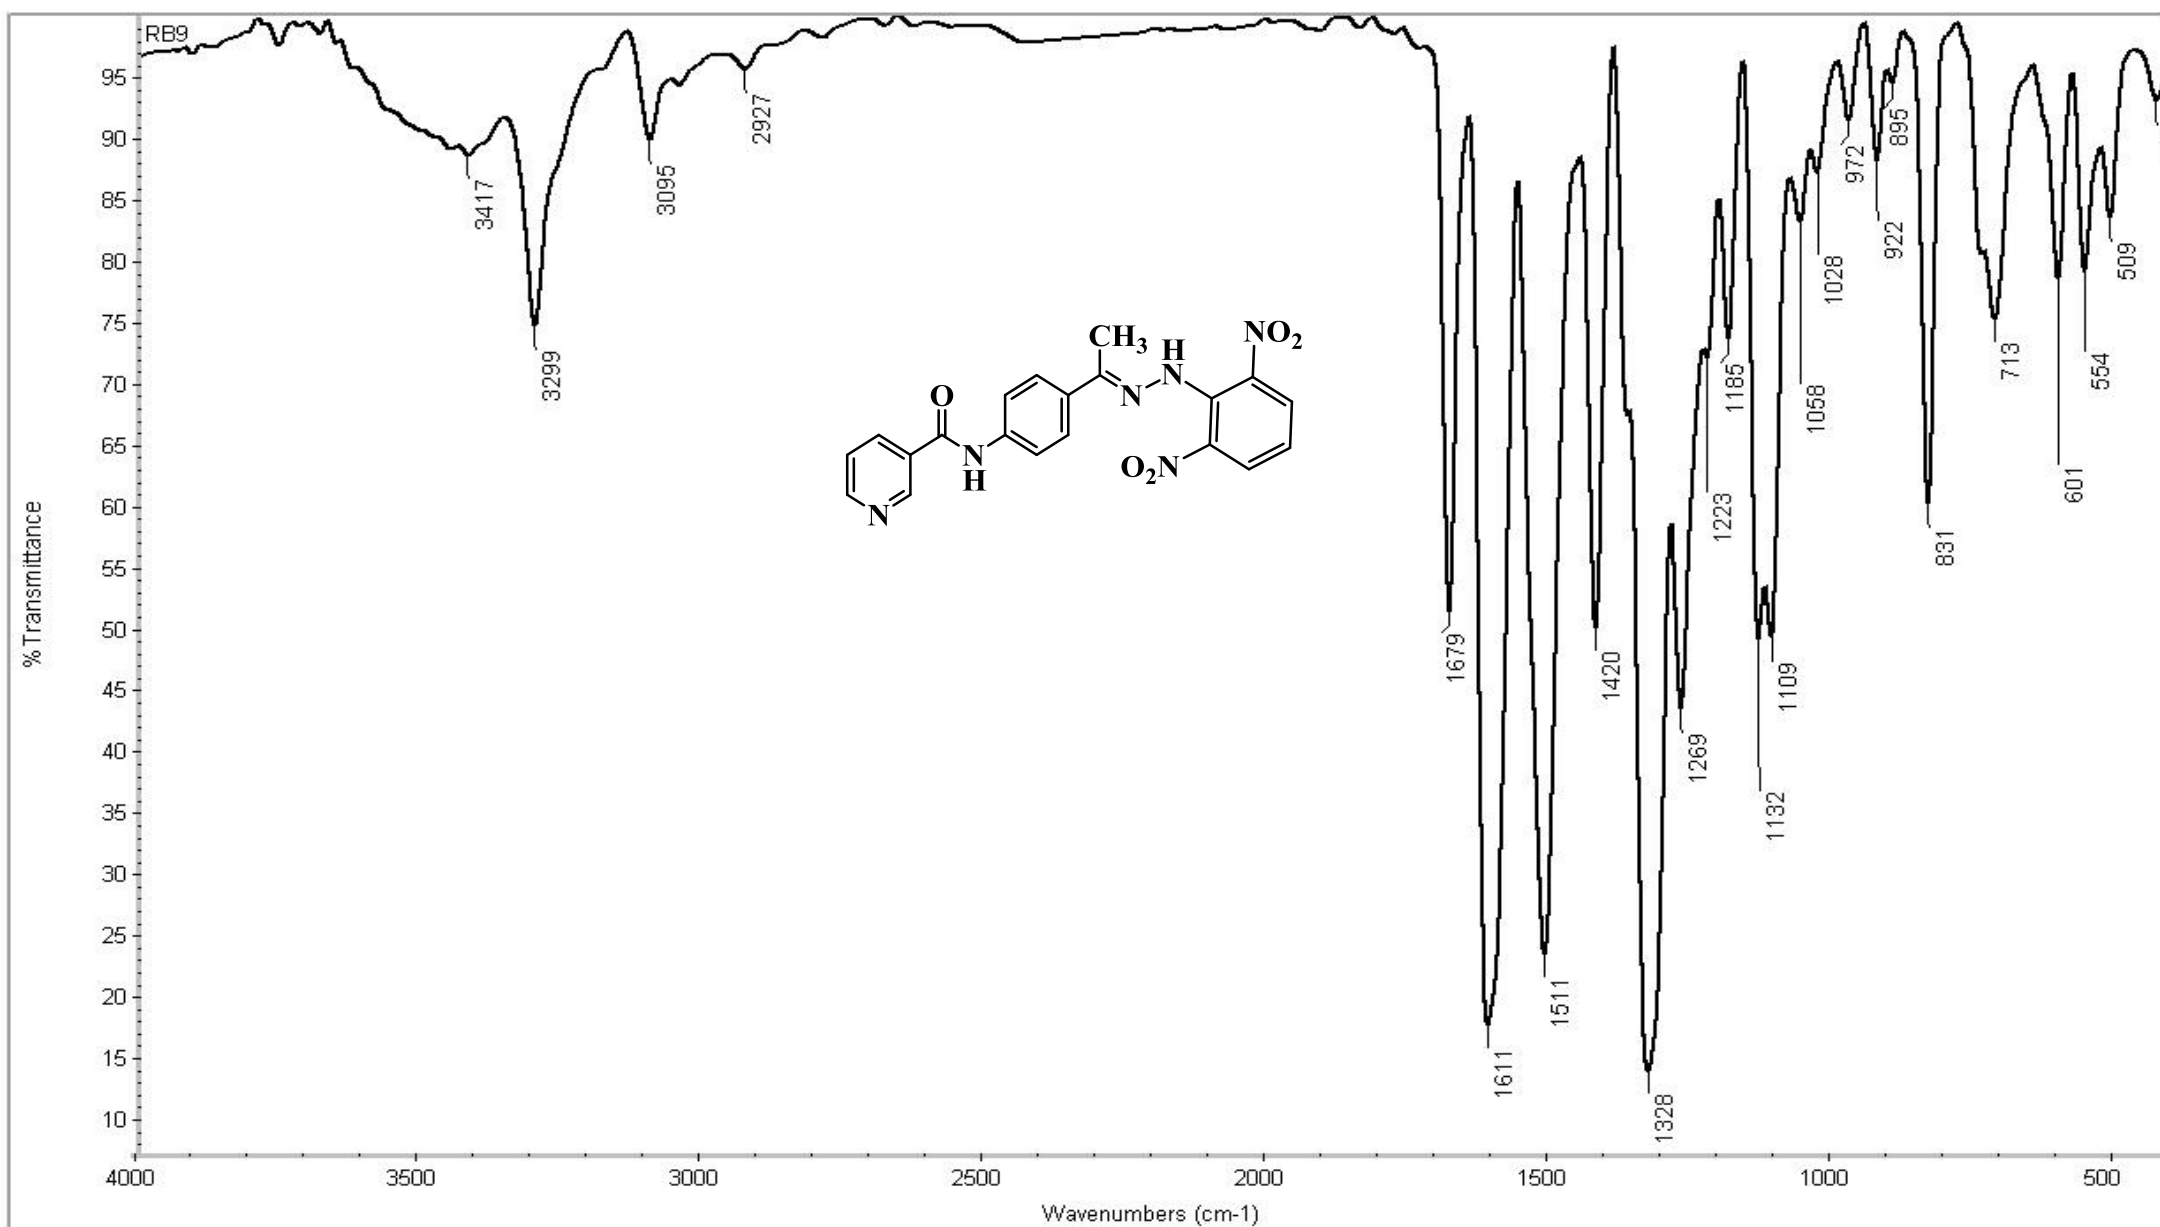



<sup>1</sup>H NMR of compound 12

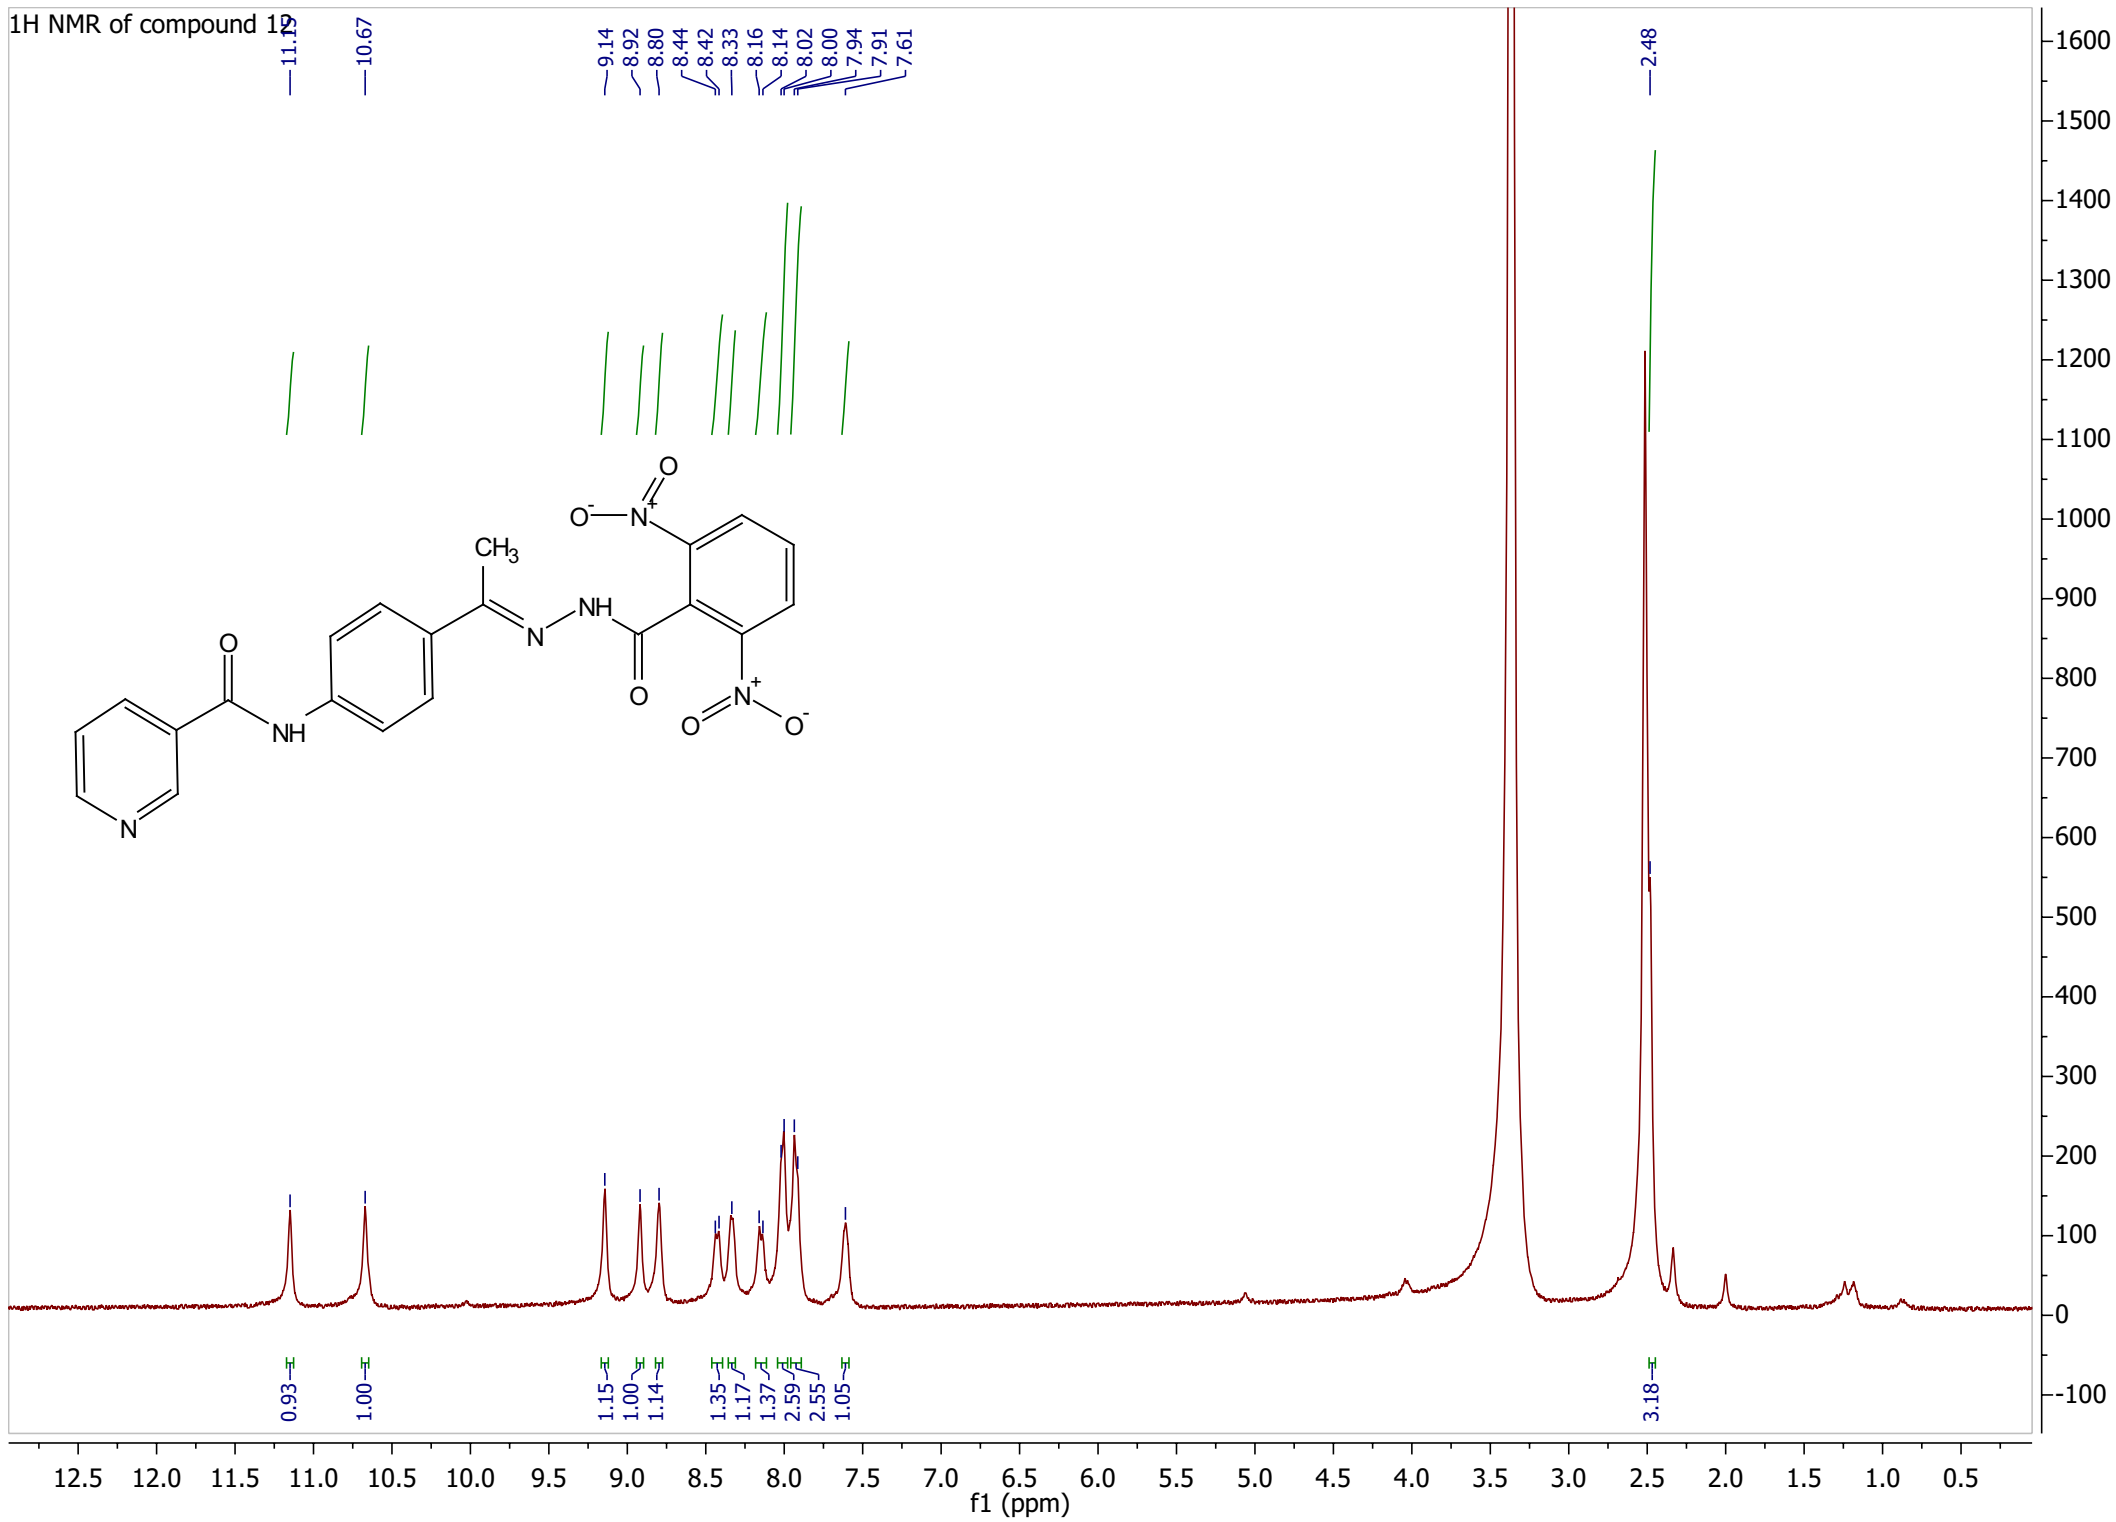



<sup>1</sup>H NMR of compound 12

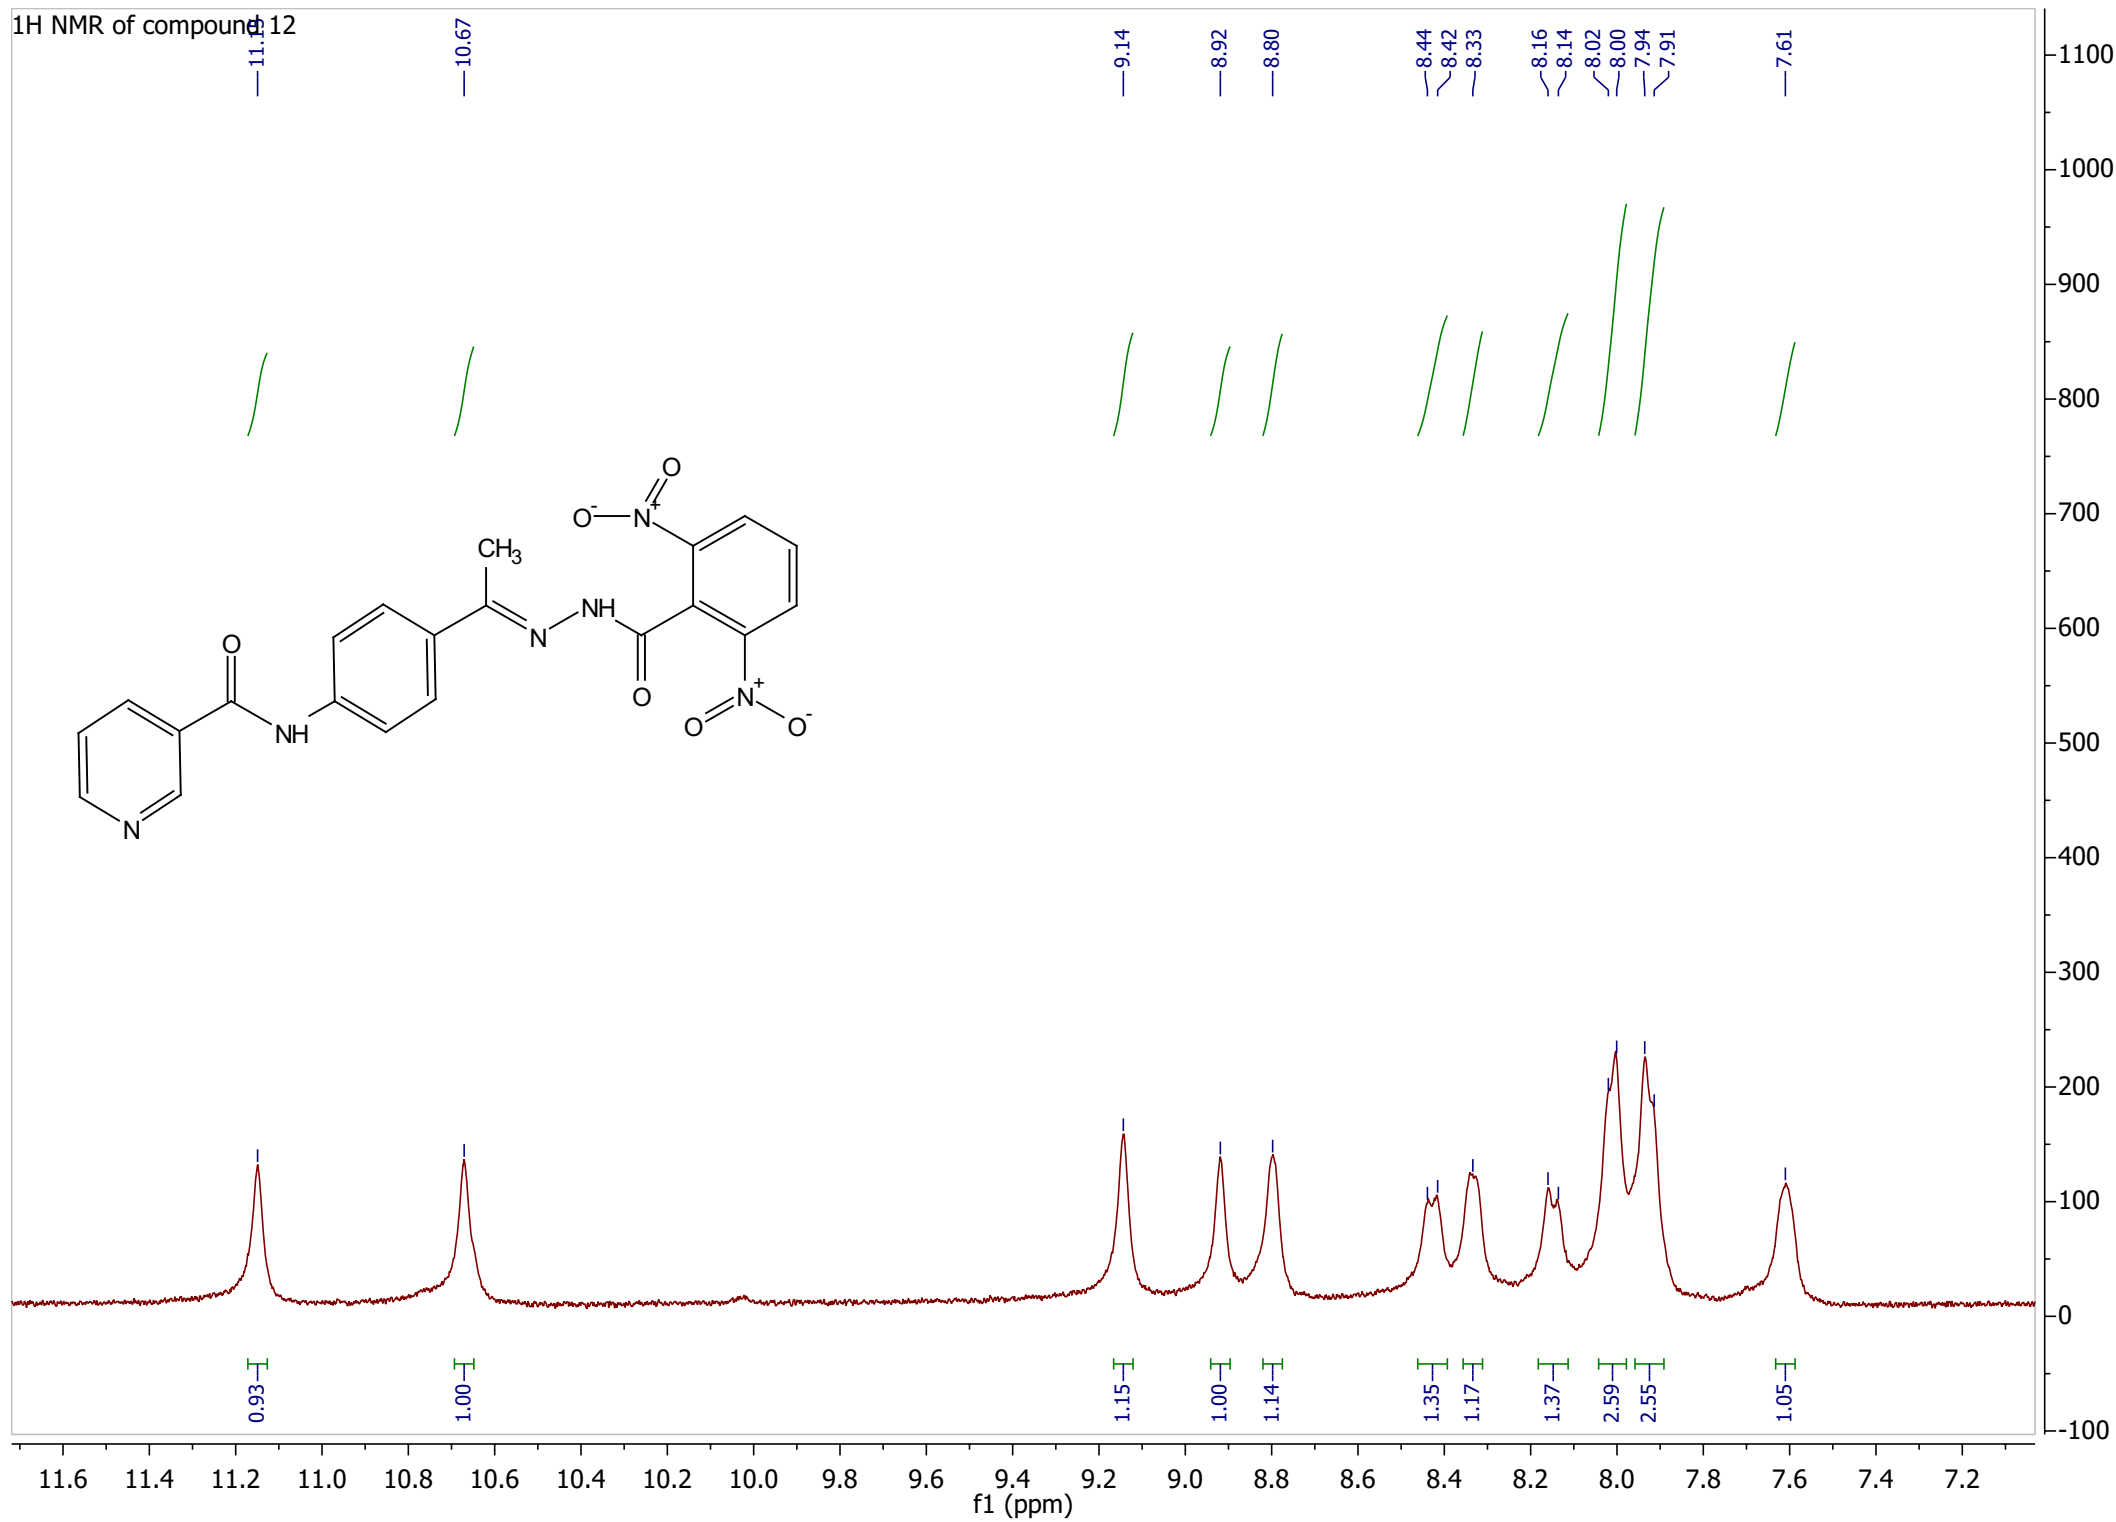



<sup>1</sup>H NMR of compound 12

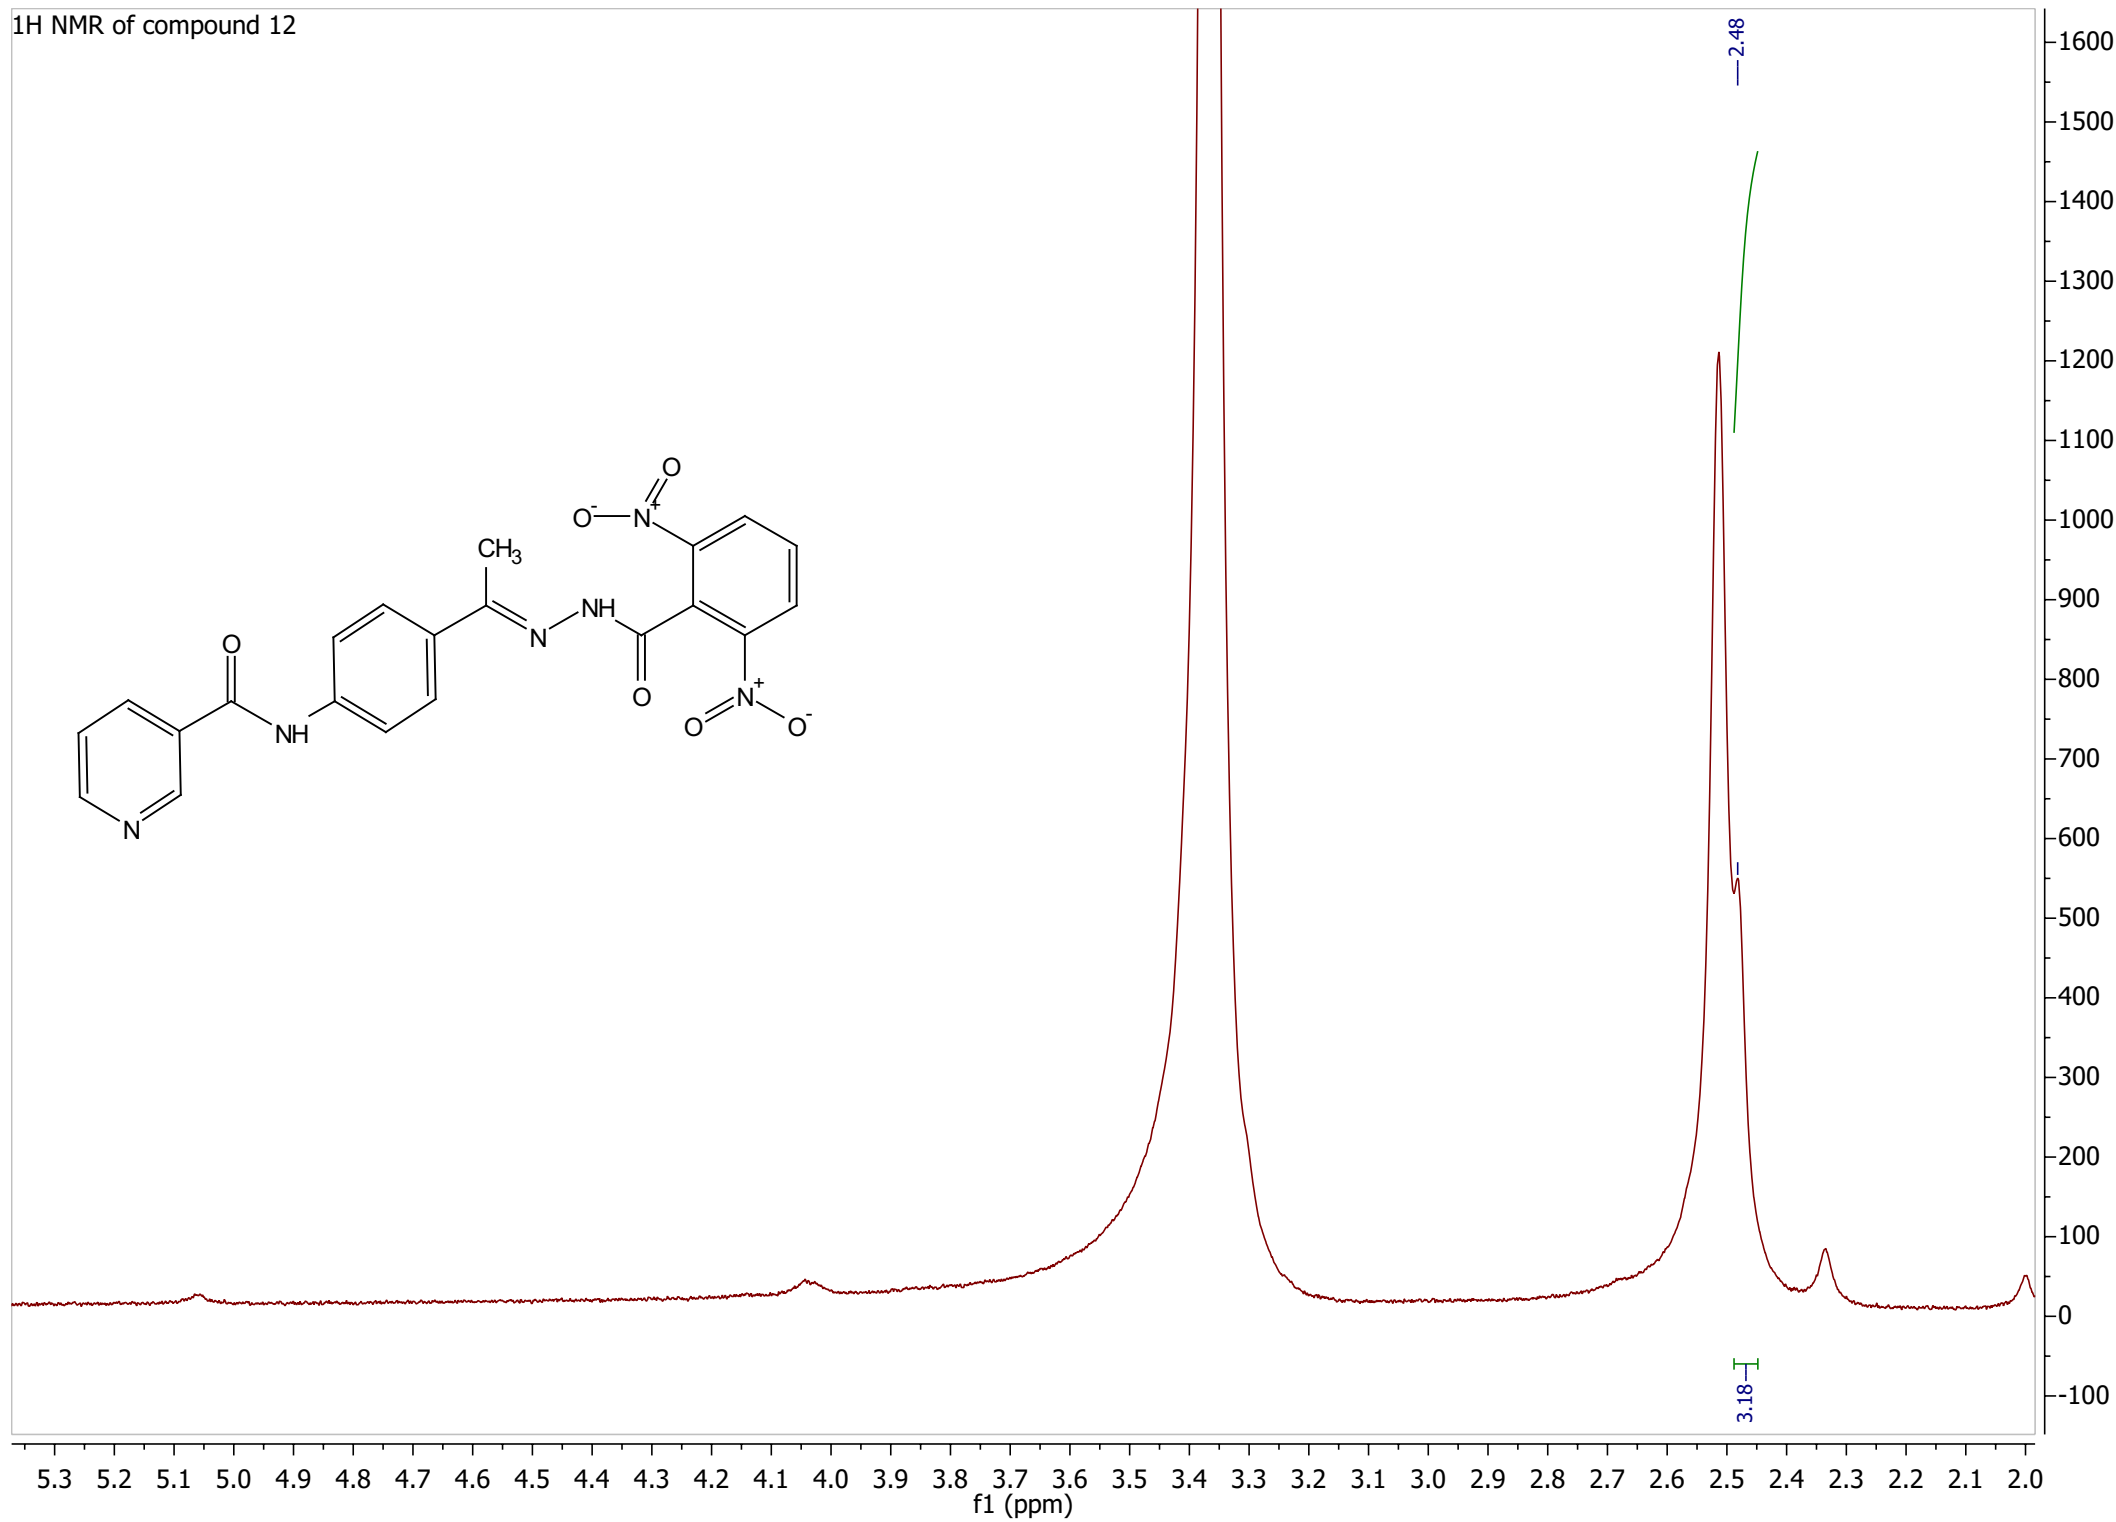



<sup>13</sup>C NMR of compound 12

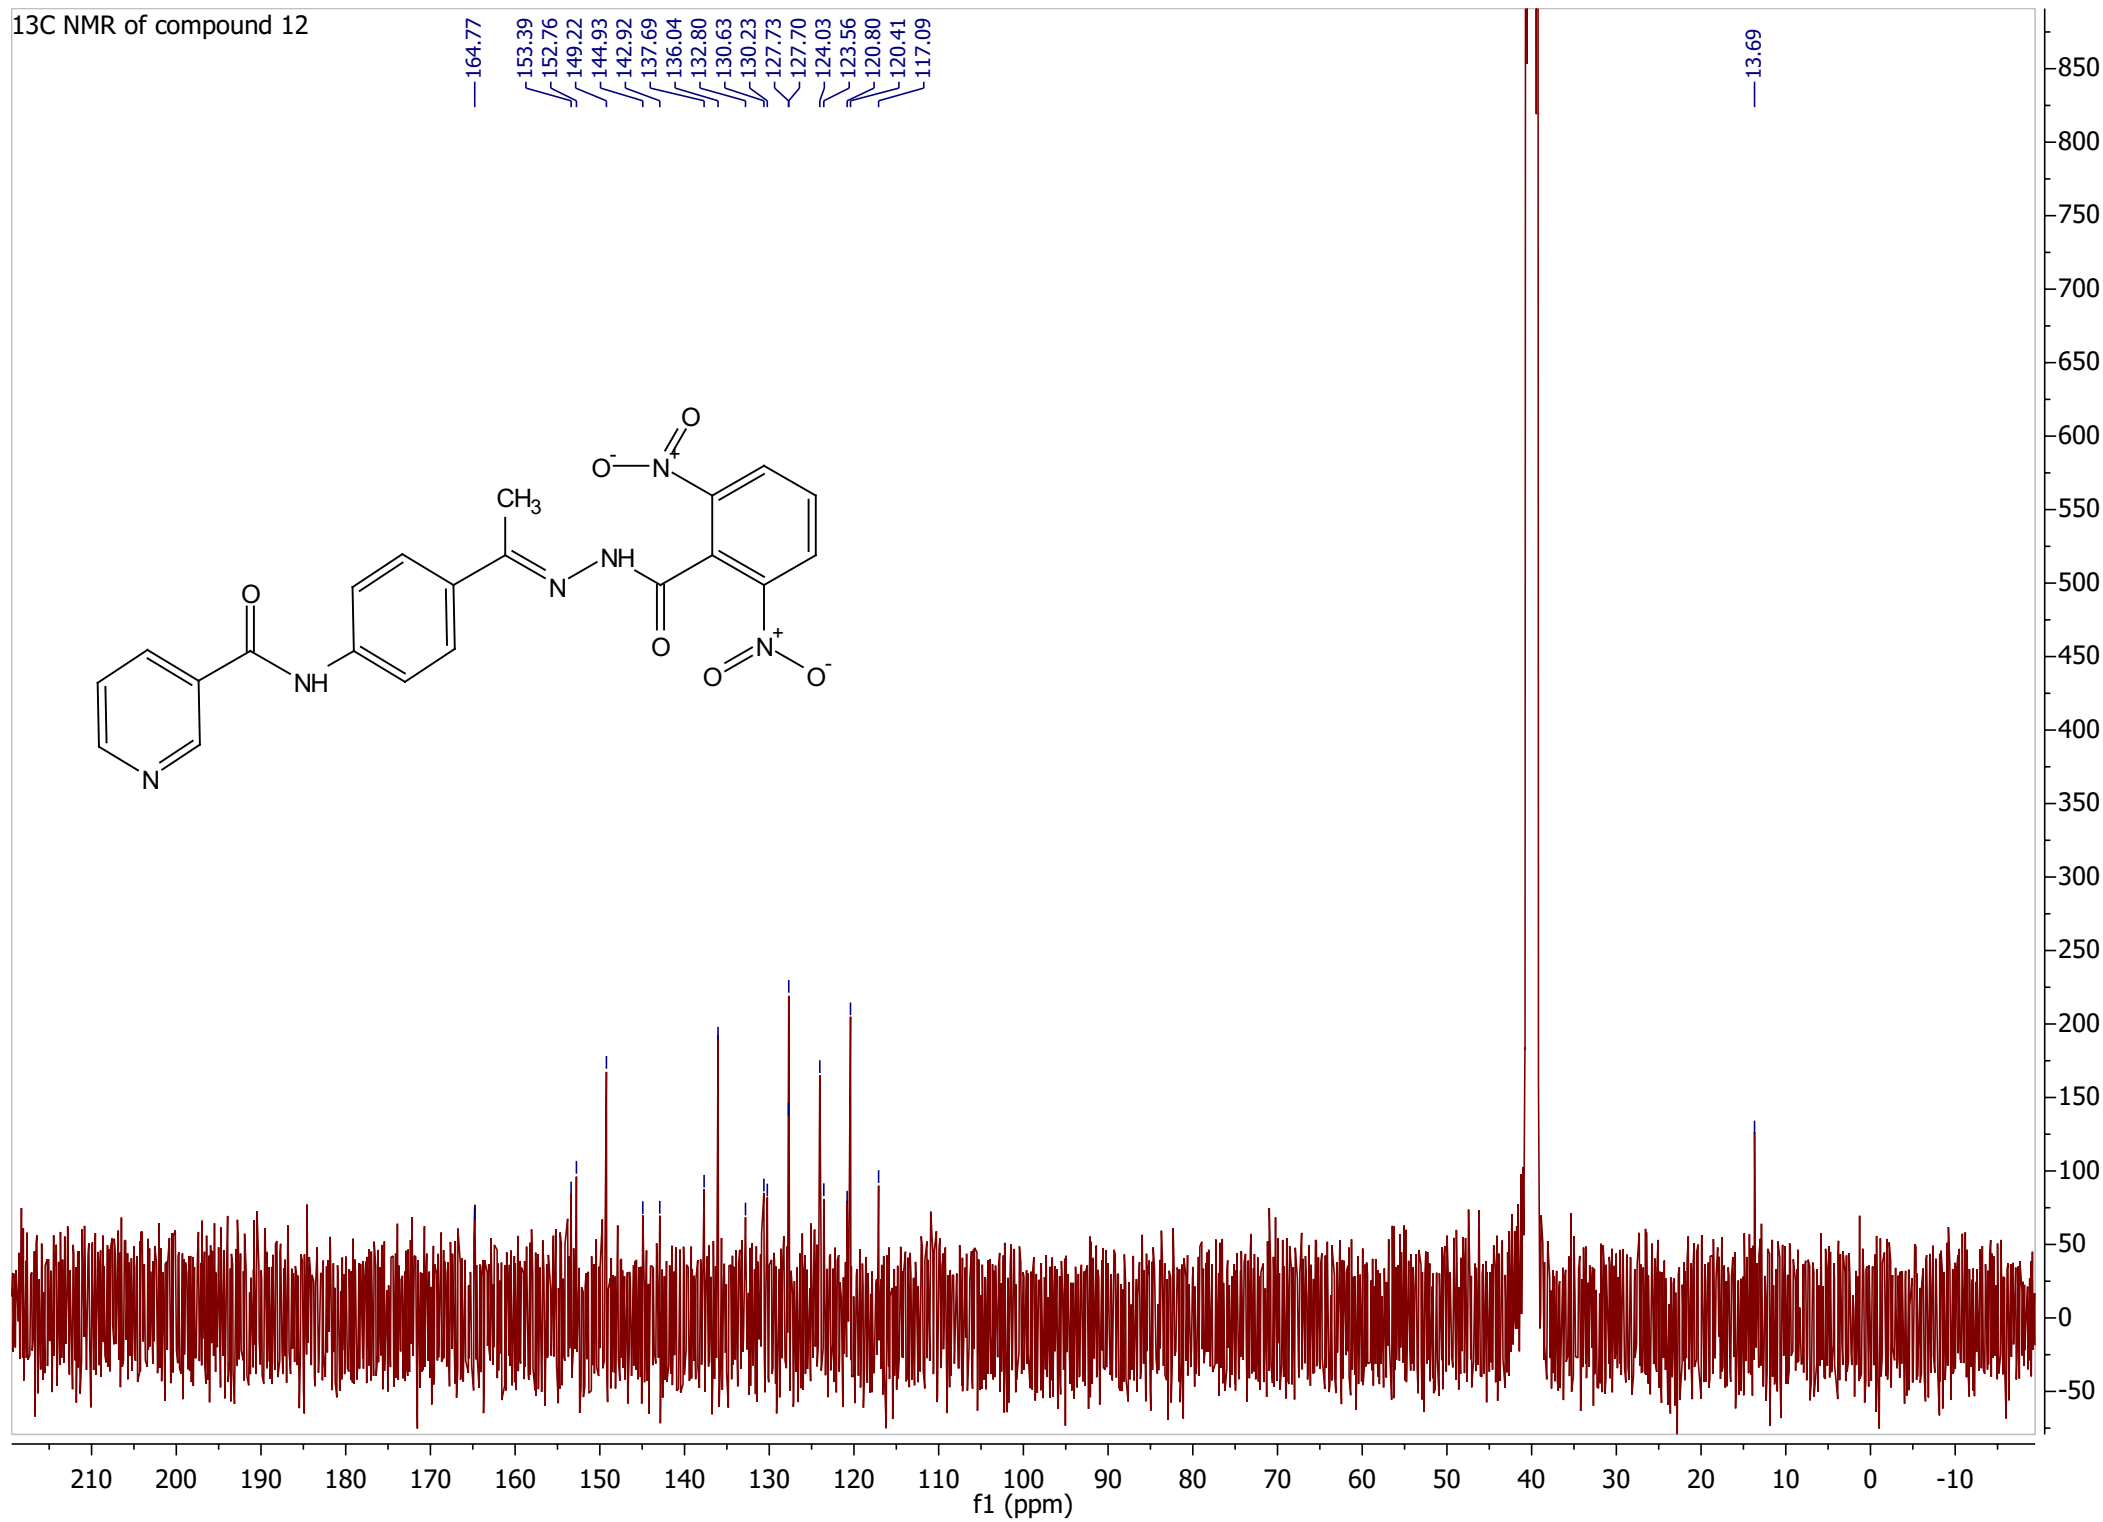



<sup>13</sup>C NMR of compound 12

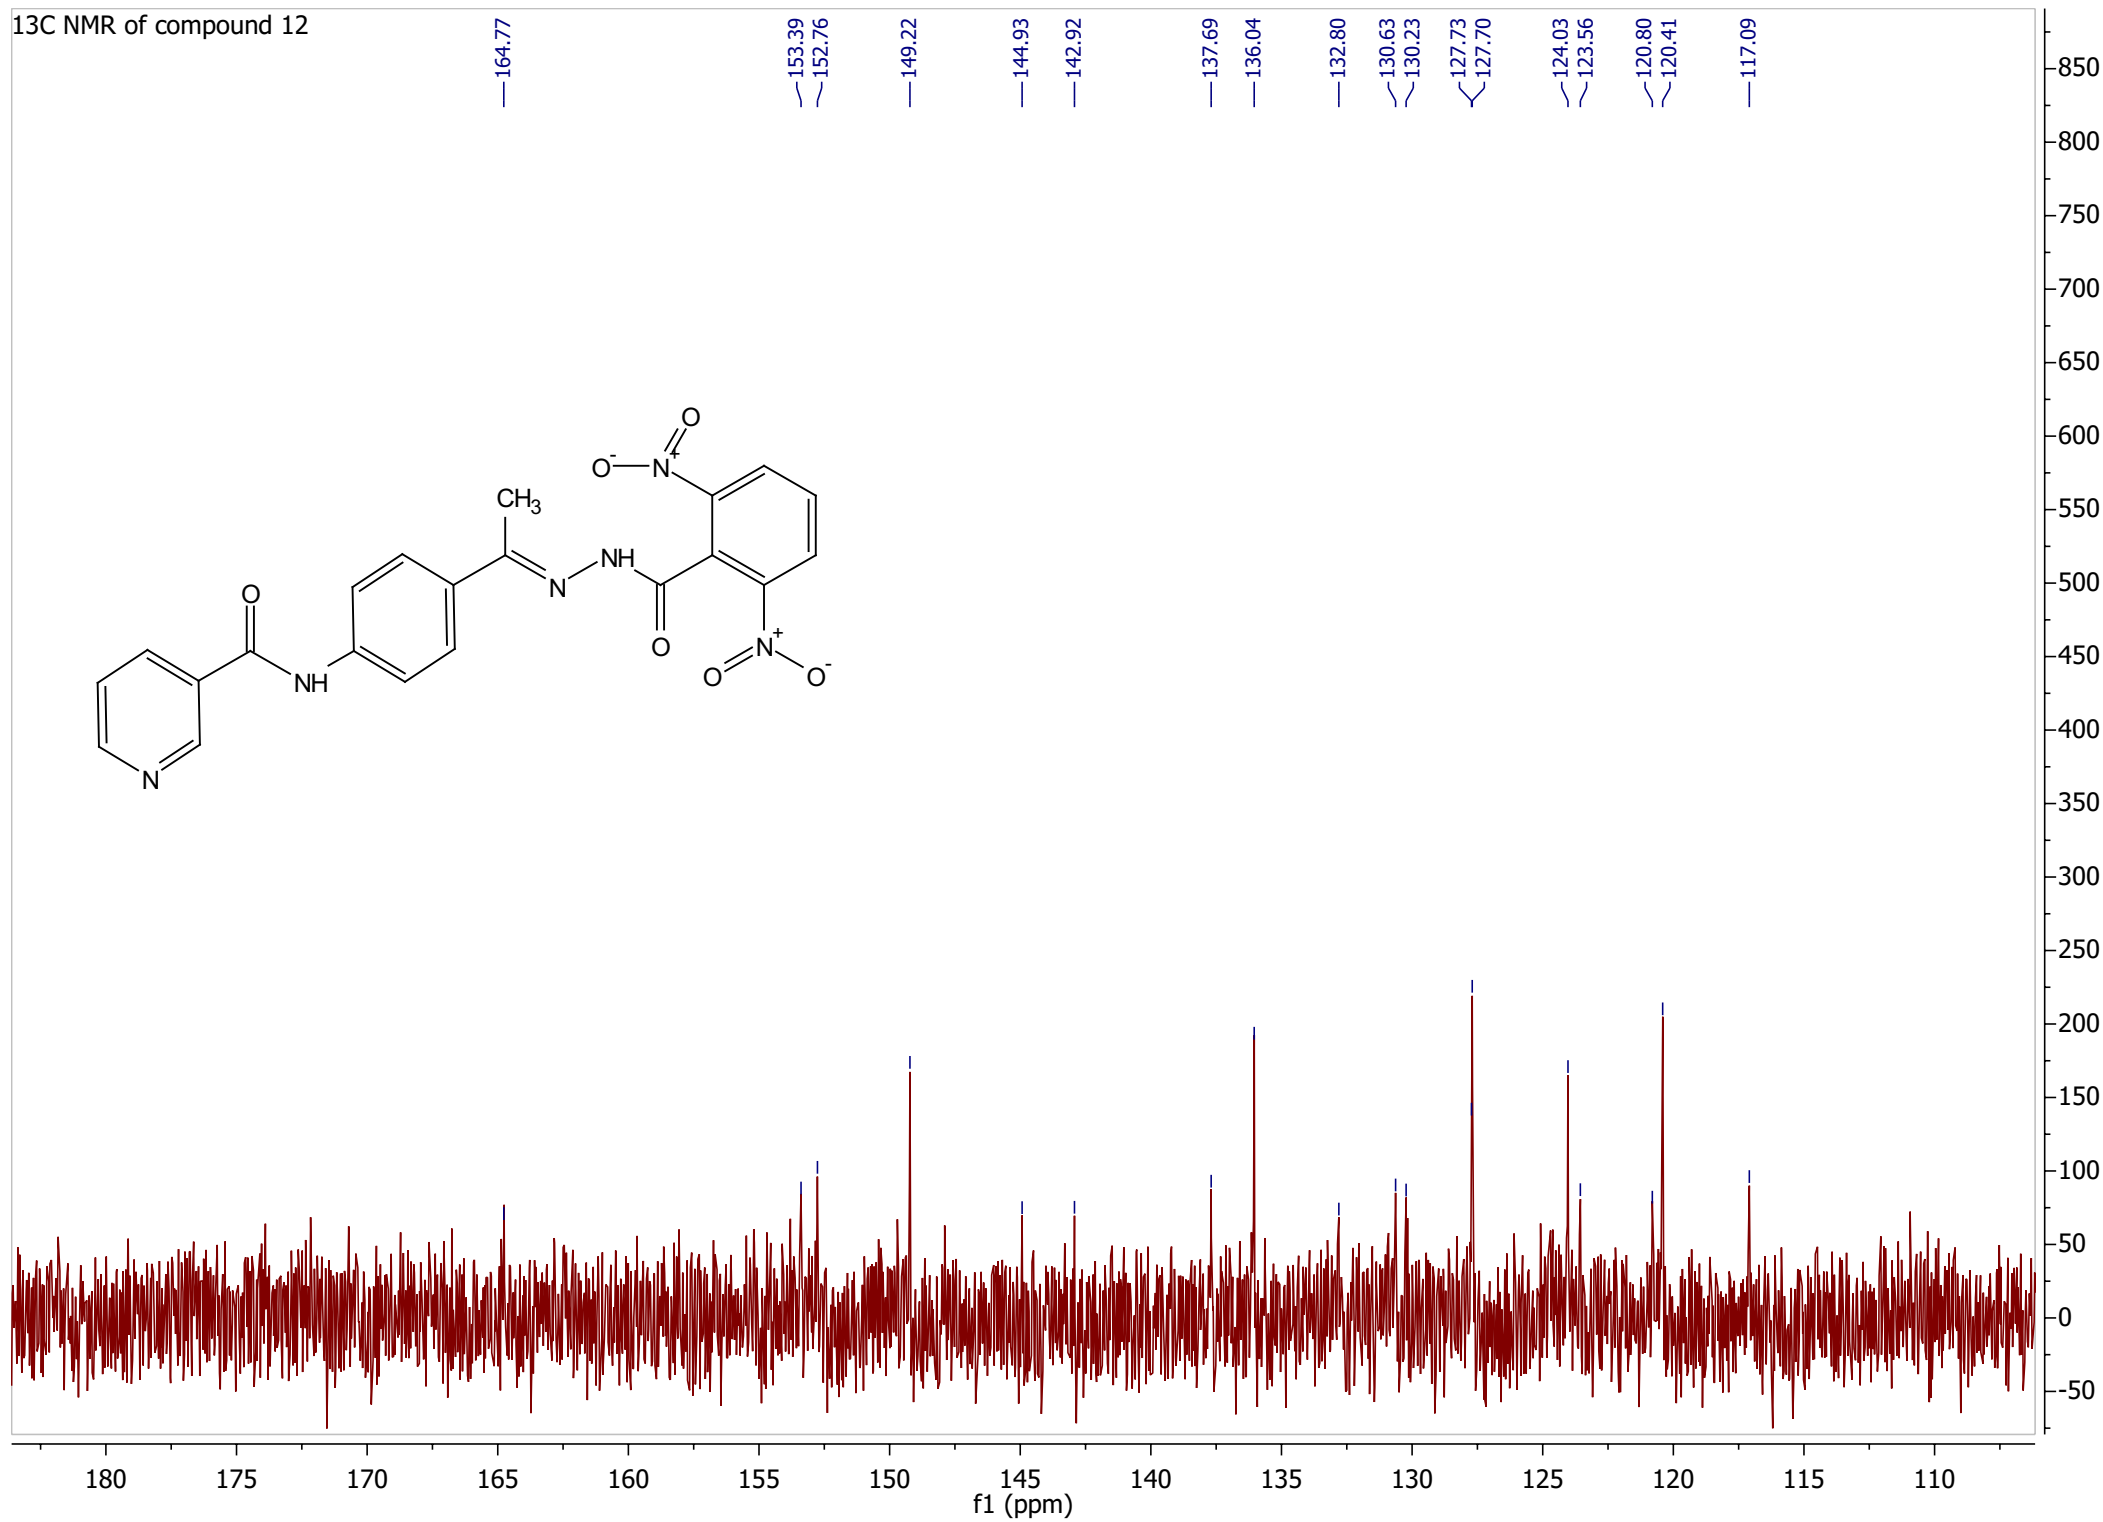



#### 4.3.1. In vitro anti-proliferative activity

The in vitro antiproliferative activities of the synthesized compounds were evaluated against two human tumor cell lines: hepatocellular carcinoma (HepG2) and breast cancer (MCF-7) using MTT assay protocol. The commercially available sorafenib were used in this test as a positive control. The tested cell lines were purchased and dropped on the appropriate growth medium. The growth medium was supplemented with 100 mg/mL of streptomycin, 100 units/mL of penicillin and 10% of heat-inactivated fetal bovine serum in a humidified 5% (v/v) CO<sub>2</sub> atmosphere at 37 °C. Then the cells from the two cancer cell lines were seeded at the appropriate densities into 96-well microtiter plates. After incubation for 24 h, the growth medium of each cell was treated with graded concentrations (1, 5, 10, 25, 50 µM) of the test compounds and incubated for three days. The viability of treated cells was determined using 3-[4,5-dimethylthiazole-2-yl]- 2,5-diphenyltetrazolium bromide (MTT) technique as cells were stained with 5% MTT solution and allowed to break down the dye into colored-insoluble formazan crystals for 4 h. The formazan crystals were dissolved in acidified isopropanol for 30 min with continuous shaking at room temperature. The colorimetric assay was measured and recorded at absorbance of 570 nm. The cell viability was expressed as percentage of control and the concentration that induces 50% of maximum inhibition of cell proliferation considering control group as 100% viability and group treated with a mixture of toxic compounds as 0% viability. (IC<sub>50</sub>) were determined for each compound using Graph Pad Prism version 5 software by plotting of log C against % viability.

#### 4.3.2. In vitro VEGFR-2 kinase assay

The synthesized compounds were estimated for their in vitro inhibition on human VEGFR-2 in HepG2 cell line; using ELISA kit. Firstly, a plate was used for the assay had been coated by an antibody specific for human VEGFR-2 enzyme, Sorafenib was nominated as a standard VEGFR-2 inhibitor. Both standard and samples were added to the wells and incubated overnight at 4 °C, then washed. The biotinylated antibody was



supplemented and further incubated for 1 h at room temperature. The unreacted, liberated antibody was then washed; followed by addition of HRP-conjugated streptavidin and incubated for 45 min at room temperature. Wells were washed and a TMB substrate solution was added and kept at room temperature for 30 min. Finally, the stop solution was added, and the intensity of the color produced was measured at 450 nm. Concentration-inhibition response curve was established by GraphPad Prism 5.0. The IC<sub>50</sub> value was calculated as the concentration at which 50% of the cells could survive in comparison to sorafenib.

#### **4.3.3. Flow cytometry analysis for cell cycle**

Cell cycle analysis for the most potent candidate **27a** was carried out through Flow cytometric analysis. In this test HepG2 cells were supplemented with the test compound at its cytotoxic concentration, seeded and subjected for incubation for 24 h at 37 °C and 5% CO<sub>2</sub>. Cells were washed twice with phosphate buffer saline, then the centrifugation of cell pellets had been completed, followed by preservation with ice-cold 70% ethanol for 15 min. Pellets were collected again and incubated with propidium iodide (PI) staining solution. After incubation for one hour at room temperature, it was analyzed by flowcytometry on an FC500 cytometer (Beckman Coulter) and the cell cycle distributions were calculated.

#### **4.3.4. Flow cytometry analysis for apoptosis**

Flow cytometry cell apoptosis analysis was used to investigate the apoptotic effect of the most active compound **27a** in HepG2 cells, the examination depends on that AnnexinV-fluorescein isothiocyanate (Annexin V-FITC) is a protein that has high affinity to phosphatidyl serine PS, which can be detected by staining with Annexin V-FITC and counter staining with propidium iodide (PI). In such procedure, HepG2 cells were incubated together with the tested compound (100 μL) for 24 h. Then, the cells were centrifuged, collected by trypsin, washed with PBS two successive times, and suspended in 500 μL of binding buffer. The double staining Annexin V-FITC (5 μL) and PI (5 μL) were added to the cells and incubated in the dark for 5 min at room temperature. The stained cells were analyzed for flow cytometry using FACS caliber flow cytometer and apoptosis detection kit (BD Biosciences, San Jose, CA)



#### 4.3.5. Quantitative Real Time Reverse-Transcriptase PCR technique

The quantity of BAX, Bcl-2, and caspase3 mRNA in control and Ay17 (at the IC<sub>50</sub> concentration)-treated HepG2 cells was assessed by qRT-PCR (reference). Total RNA from vehicle-treated control (0.01% DMSO) and 10k-treated HepG2 cells were extracted as-per the manufacturer instructions (RNeasy mini kit, Qiagen, Germany). After RNA extraction, cDNA was prepared using the Revert Aid First Strand cDNA Synthesis kit (Thermo Scientific, USA). Amplification of target cDNA for apoptosis markers and GAPDH [as a normalization (housekeeping) gene] was done using one-step RT-PCR SYBR<sup>®</sup> Green kit Master Mix (Bio-Rad Laboratories, USA) on Rotor-Gene Q real-time PCR thermal cycler instrument. cDNA (2 µl aliquots) was mixed with 1 µl of forward primer, 1 µl reverse primer, 10 µl master mixture, and the reaction volume was completed to 20 µl with nuclease-free water. All experiments were performed in triplicates

The sequences for primers used in quantitative Real Time Reverse-Transcriptase PCR (qRT-PCR)

| Gene             | Primer sequence                     |
|------------------|-------------------------------------|
| <b>BAX</b>       | F: 5'- CCCGAGAGGTCTTTTCCGAG -3'     |
|                  | R: 5'- CCAGCCCATGATGGTTCTGAT -3'    |
| <b>Bcl-2</b>     | F: 5'- TTGTGGCCTTCTTTGAGTTCGGTG -3' |
|                  | R: 5'- GGTGCCGGTTCAGGTACTCAGTCA -3' |
| <b>Caspase-3</b> | F: 5'- ACATGGAAGCGAATCAATGGACTC -3' |
|                  | R: 5'- AAGGACTCAAATTCTGTTGCCACC -3' |
| <b>GABDH</b>     | F: 5'- GACCCCTTCAT GACCTCAAC -3'    |
|                  | R: 5'- CTTCTCCATGGTGGTGAAGA -3'     |



#### 4.4.1. Docking studies

The docking studies were performed utilizing MOE.14 software to explore the binding mode of the synthesized compounds towards VEGFR-2. The 3D crystal structures of the target macromolecules VEGFR-2 were downloaded from the protein databank, <http://www.pdb.org> (PDB ID; 2OH4 and 4ASD). Sorafenib was used as reference ligand. To prepare the target protein, water molecules were removed, and the valances of atoms were corrected through protonation of the whole molecule. Then energy minimization was carried out by applying CHARMM and MMFF94 force fields. After that, the active binding site was defined and prepared for docking. The validation process was performed by redocking the co-crystallized ligand. The designed compounds together with sorafenib were drawn using ChemBioDraw Ultra 14.0 and saved as MDL-SD format. The sketched compounds were constructed from fragment libraries in MOE program, protonated, followed by energy minimization then prepared for docking. Docking process was carried through Triangle matcher placement inserted in compute window, and the scoring function was London dG. Ten conformers (poses) for each molecule were generated using genetic algorithm searches. The free energies and binding modes of the designed molecules against VEGFR-2 were determined. The most ideal pose was selected according to its binding free energy as well as its binding mode with target molecule.

#### 4.4.2. ADMET studies

ADMET descriptors (absorption, distribution, metabolism, excretion and toxicity) of the synthesized compounds were determined using Discovery studio 4.0. At first, the CHARMM force field was applied then the compounds were prepared and minimized according to the preparation of small molecule protocol. Then ADMET descriptors protocol was applied to carry out these studies.

#### 4.4.3. Toxicity studies

The toxicity parameters of the synthesized compounds were calculated using Discovery studio 4.0. Sorafenib was used as a reference drug. At first, the CHARMM force field was applied then the compounds were prepared and minimized according to the preparation of small molecule protocol. Then different parameters were calculated from toxicity prediction (extensible) protocol.



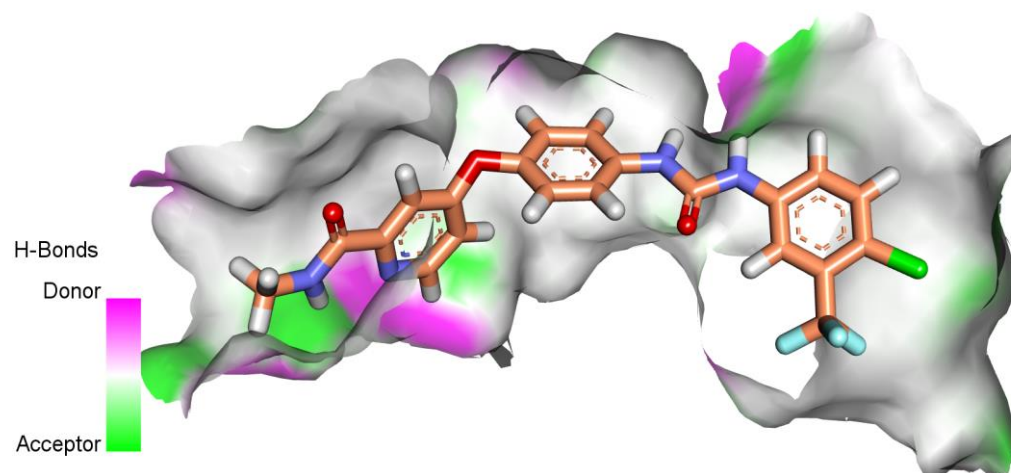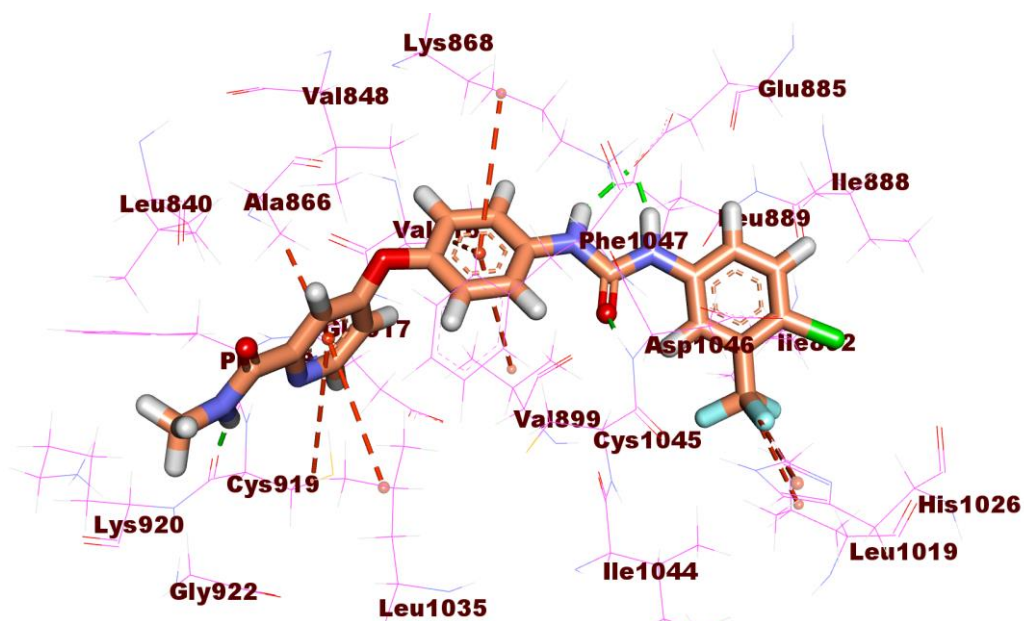

Binding mode of sorafenib into VEGFR-2 active site



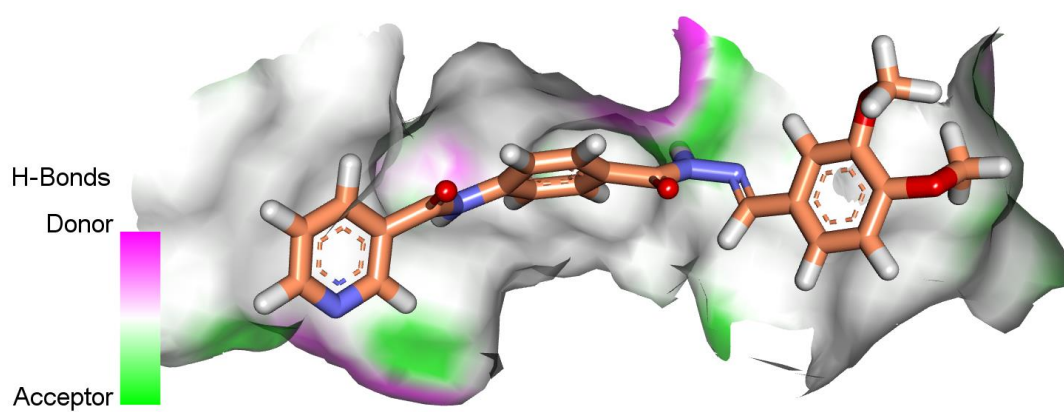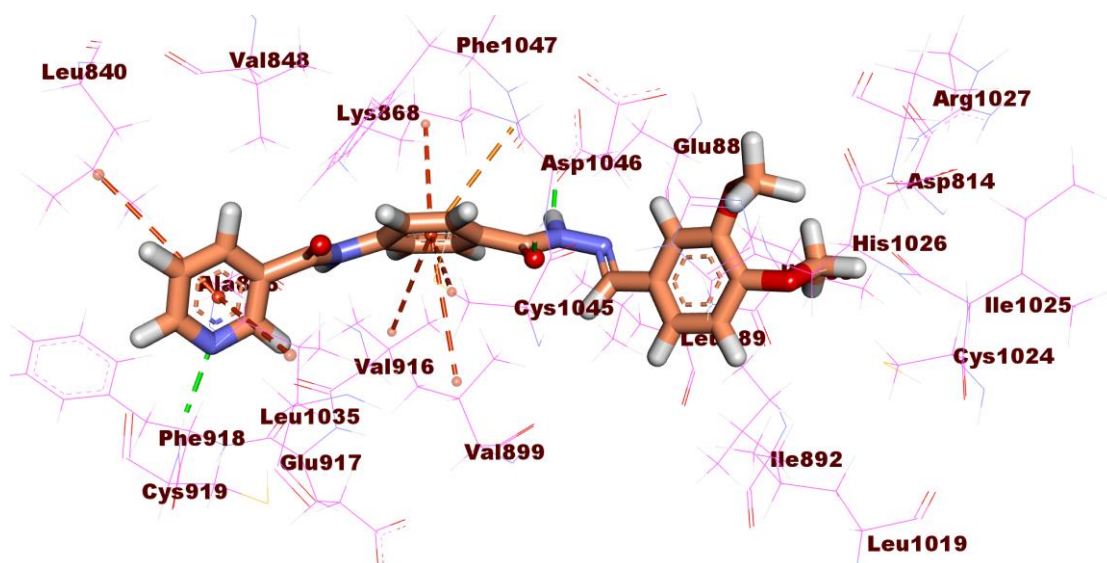

Binding mode of compound 7 into VEGFR-2 active site



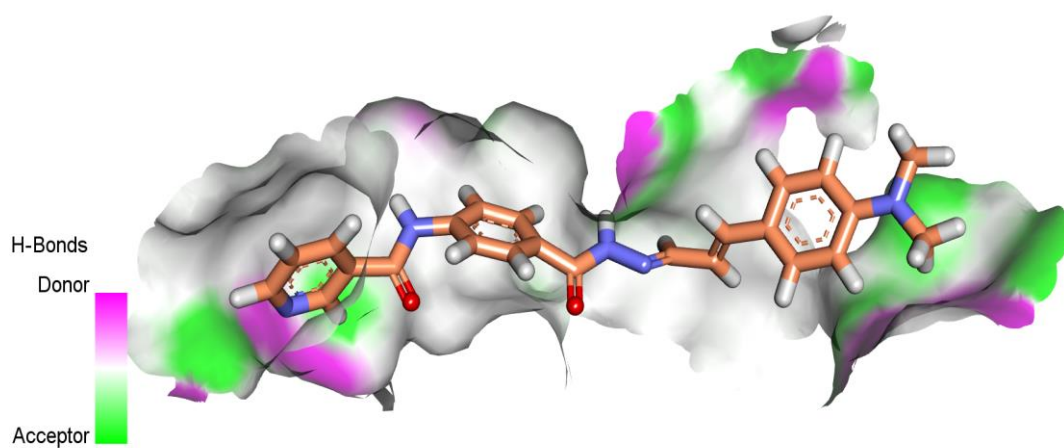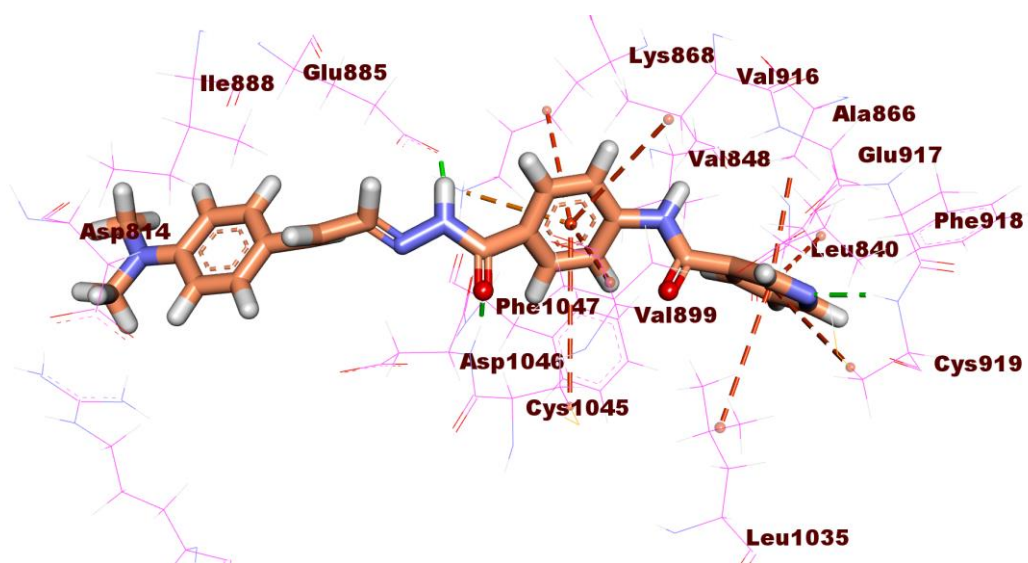

Binding mode of compound **8** into VEGFR-2 active site



## 1- Molecular Dynamics (MD) Simulations

The system was prepared using the web-based CHARMM-GUI[1-3] interface with the CHARMM36 force field[4]. All the simulations were done using the NAMD 2.13[5] package. The TIP3P explicit solvation model was used[6], and the periodic boundary conditions were set with a dimension of 82.65 Å, 82.36 Å, and 82.64 Å in x, y, and z, respectively. The parameters for the top docking results were generated using the CHARMM general force field[7]. Afterward, the system was neutralized using required number of Cl<sup>-</sup>/Na<sup>+</sup> ions. The MD protocols involved minimization, equilibration, and production. a 2 fs time step of integration was chosen for all MD simulations, the equilibration was carried in the canonical (*NVT*) ensemble, while the isothermal–isobaric (*NPT*) ensemble was for the production. Through the 100 ns of MD production, the pressure was set at 1 atm using the Nose–Hoover Langevin piston barostat [8, 9] with a Langevin piston decay of 0.05 ps and a period of 0.1 ps. The temperature was set at 298.15 K using the Langevin thermostat[10]. A distance cutoff of 12.0 Å was applied to short-range nonbonded interactions with a pair list distance of 16 Å, and Lennard Jones interactions were smoothly truncated at 8.0 Å. Long-range electrostatic interactions were treated using the particle-mesh Ewald (PME) method[11, 12], where a grid spacing of 1.0 Å was used for all simulation cells. All covalent bonds involving hydrogen atoms were constrained using the SHAKE algorithm[13]. For consistency, we have applied the same protocol for all MD simulations.

## 2- Molecular Mechanics Poisson–Boltzmann Surface Area (MM-PBSA)

The Molecular Mechanics Poisson–Boltzmann surface area (MM-PBSA) [14, 15] approach implemented in the MOLAICAL code[16] was used for the relative binding energy calculations, in which the ligand (*L*) binds to the protein receptor (*R*) to form the complex (*RL*),

$$\Delta G_{bind} = \Delta G_{RL} - \Delta G_R - \Delta G_L$$

which can be represented by contributions of different interactions,

$$\Delta G_{bind} = \Delta H - T\Delta S = \Delta E_{MM} + \Delta G_{Sol} - T\Delta S$$



where the changes in the gas phase molecular mechanics ( $\Delta E_{MM}$ ), solvation Gibbs energy ( $\Delta G_{Sol}$ ), and conformational entropy ( $-T\Delta S$ ) are determined as follows:  $\Delta E_{MM}$  is the sum of the changes in the electrostatic energies  $\Delta E_{ele}$ , the van der Waals energies  $\Delta E_{vdW}$ , and the internal energies  $\Delta E_{int}$  (bonded interactions);  $\Delta G_{Sol}$  is the total of both the polar solvation (calculated using the generalized Born model) and the nonpolar solvation (calculated using the solvent-accessible surface area) and  $-T\Delta S$  is calculated by the normal mode analysis. The solvent dielectric constant of 78.5 and the surface tension constant of  $0.03012 \text{ kJ mol}^{-1} \text{ \AA}^2$  were used for MM/GBSA calculations.

- [1] S. Jo, T. Kim, V.G. Iyer, W. Im, CHARMM-GUI: A web-based graphical user interface for CHARMM, *Journal of computational chemistry* 29(11) (2008) 1859-1865.
- [2] B.R. Brooks, C.L. Brooks III, A.D. Mackerell Jr., L. Nilsson, R.J. Petrella, B. Roux, Y. Won, G. Archontis, C. Bartels, S. Boresch, A. Caflisch, L. Caves, Q. Cui, A.R. Dinner, M. Feig, S. Fischer, J. Gao, M. Hodoscek, W. Im, K. Kuczera, T. Lazaridis, J. Ma, V. Ovchinnikov, E. Paci, R.W. Pastor, C.B. Post, J.Z. Pu, M. Schaefer, B. Tidor, R.M. Venable, H.L. Woodcock, X. Wu, W. Yang, D.M. York, M. Karplus, CHARMM: The biomolecular simulation program, *Journal of computational chemistry* 30(10) (2009) 1545-1614.
- [3] J. Lee, X. Cheng, J.M. Swails, M.S. Yeom, P.K. Eastman, J.A. Lemkul, S. Wei, J. Buckner, J.C. Jeong, Y. Qi, S. Jo, V.S. Pande, D.A. Case, C.L. Brooks, A.D. MacKerell, J.B. Klauda, W. Im, CHARMM-GUI Input Generator for NAMD, GROMACS, AMBER, OpenMM, and CHARMM/OpenMM Simulations Using the CHARMM36 Additive Force Field, *Journal of chemical theory and computation* 12(1) (2016) 405-413.
- [4] R.B. Best, X. Zhu, J. Shim, P.E. Lopes, J. Mittal, M. Feig, A.D. Mackerell, Jr., Optimization of the additive CHARMM all-atom protein force field targeting improved sampling of the backbone phi, psi and side-chain chi(1) and chi(2) dihedral angles, *Journal of chemical theory and computation* 8(9) (2012) 3257-3273.
- [5] J.C. Phillips, R. Braun, W. Wang, J. Gumbart, E. Tajkhorshid, E. Villa, C. Chipot, R.D. Skeel, L. Kale, K. Schulten, Scalable molecular dynamics with NAMD, *Journal of computational chemistry* 26(16) (2005) 1781-802.
- [6] W.L. Jorgensen, J. Chandrasekhar, J.D. Madura, R.W. Impey, M.L. Klein, Comparison of simple potential functions for simulating liquid water, *The Journal of Chemical Physics* 79(2) (1983) 926-935.
- [7] W. Yu, X. He, K. Vanommeslaeghe, A.D. MacKerell, Jr., Extension of the CHARMM General Force Field to sulfonyl-containing compounds and its utility in biomolecular simulations, *Journal of computational chemistry* 33(31) (2012) 2451-68.
- [8] S. Nosé, M.L. Klein, Constant pressure molecular dynamics for molecular systems, *Molecular Physics* 50(5) (1983) 1055-1076.
- [9] S. Nosé, A molecular dynamics method for simulations in the canonical ensemble, *Molecular Physics* 52(2) (1984) 255-268.



- [10] G.S. Grest, K. Kremer, Molecular dynamics simulation for polymers in the presence of a heat bath, *Physical review. A, General physics* 33(5) (1986) 3628-3631.
- [11] T. Darden, D. York, L. Pedersen, Particle mesh Ewald: AnN·log(N) method for Ewald sums in large systems, *The Journal of Chemical Physics* 98(12) (1993) 10089-10092.
- [12] U. Essmann, L. Perera, M.L. Berkowitz, T. Darden, H. Lee, L.G. Pedersen, A smooth particle mesh Ewald method, *The Journal of Chemical Physics* 103(19) (1995) 8577-8593.
- [13] J.-P. Ryckaert, G. Ciccotti, H.J.C. Berendsen, Numerical integration of the cartesian equations of motion of a system with constraints: molecular dynamics of n-alkanes, *Journal of Computational Physics* 23(3) (1977) 327-341.
- [14] S. Genheden, U. Ryde, Comparison of end-point continuum-solvation methods for the calculation of protein-ligand binding free energies, *Proteins* 80(5) (2012) 1326-42.
- [15] E. Wang, H. Sun, J. Wang, Z. Wang, H. Liu, J.Z.H. Zhang, T. Hou, End-Point Binding Free Energy Calculation with MM/PBSA and MM/GBSA: Strategies and Applications in Drug Design, *Chemical reviews* 119(16) (2019) 9478-9508.
- [16] Q. Bai, S. Tan, T. Xu, H. Liu, J. Huang, X. Yao, MolAICal: a soft tool for 3D drug design of protein targets by artificial intelligence and classical algorithm, *Briefings in bioinformatics* 22(3) (2021) bbaa161.



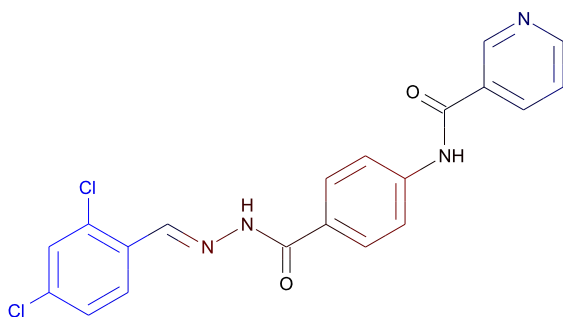

$C_{20}H_{14}Cl_2N_4O_2$

Molecular Weight: 413.25676

ALogP: 3.646

Rotatable Bonds: 5

Acceptors: 4

Donors: 2

## Model Prediction

Prediction: Non-Mutagen

Probability: 0.587

Enrichment: 1.05

Bayesian Score: -5.39

Mahalanobis Distance: 7.53

Mahalanobis Distance p-value: 0.999

Prediction: Positive if the Bayesian score is above the estimated best cutoff value from minimizing the false positive and false negative rate.

Probability: The estimated probability that the sample is in the positive category. This assumes that the Bayesian score follows a normal distribution and is different from the prediction using a cutoff.

Enrichment: An estimate of enrichment, that is, the increased likelihood (versus random) of this sample being in the category.

Bayesian Score: The standard Laplacian-modified Bayesian score.

Mahalanobis Distance: The Mahalanobis distance (MD) is the distance to the center of the training data. The larger the MD, the less trustworthy the prediction.

Mahalanobis Distance p-value: The p-value gives the fraction of training data with an MD greater than or equal to the one for the given sample, assuming normally distributed data. The smaller the p-value, the less trustworthy the prediction. For highly non-normal X properties (e.g., fingerprints), the MD p-value is wildly inaccurate.

## Structural Similar Compounds

| Name               | N/A                         | N/A                         | 4651-67-6                                        |
|--------------------|-----------------------------|-----------------------------|--------------------------------------------------|
| Structure          |                             |                             |                                                  |
| Actual Endpoint    | Mutagen                     | Mutagen                     | Non-Mutagen                                      |
| Predicted Endpoint | Mutagen                     | Mutagen                     | Non-Mutagen                                      |
| Distance           | 0.550                       | 0.562                       | 0.568                                            |
| Reference          | Mut. Res. 280:233-244; 1992 | Mut. Res. 280:233-244; 1992 | Kazius et. al., J. Med. Chem. (2005) 48, 312-320 |

## Model Applicability

Unknown features are fingerprint features in the query molecule, but not found or appearing too infrequently in the training set.

1. All properties and OPS components are within expected ranges.

## Feature Contribution

### Top features for positive contribution

| Fingerprint | Bit/Smiles | Feature Structure                                               | Score | Mutagen in training set |
|-------------|------------|-----------------------------------------------------------------|-------|-------------------------|
| SCFP_12     | 555539852  | <br>[*]:[cH]:[c](:[cH]:[*])C(=O)N[c]1:[cH]:[cH]:[*]:[cH]:[cH]:1 | 0.447 | 22 out of 24            |



| SCFP_12                                | 818445224  | 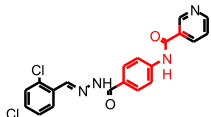<br><chem>[*][c]1:[cH]:[cH]:[c](NC(=O)[c](:[*]):[*])[cH]:1</chem> | 0.434  | 12 out of 13            |
|----------------------------------------|------------|------------------------------------------------------------------------------------------------------------------------------------------------------|--------|-------------------------|
| SCFP_12                                | 124026986  | <br><chem>[*]:[cH]:[c](:[cH]:[*])C(=O)N[c](:[*]):[*]</chem>       | 0.429  | 33 out of 37            |
| Top Features for negative contribution |            |                                                                                                                                                      |        |                         |
| Fingerprint                            | Bit/Smiles | Feature Structure                                                                                                                                    | Score  | Mutagen in training set |
| SCFP_12                                | 1809645840 | <br><chem>[*][c]1:[*]:[cH]:[c](Cl):[cH]:[c]:1Cl</chem>            | -1.33  | 12 out of 84            |
| SCFP_12                                | -274643719 | <br><chem>[*]=C[c]1:[cH]:[cH]:[c](Cl):[cH]:[c]:1Cl</chem>       | -0.916 | 1 out of 7              |
| SCFP_12                                | 1908972582 | <br><chem>[*][c]1:[cH]:[cH]:[c](Cl):[cH]:[c]:1Cl</chem>         | -0.821 | 10 out of 42            |



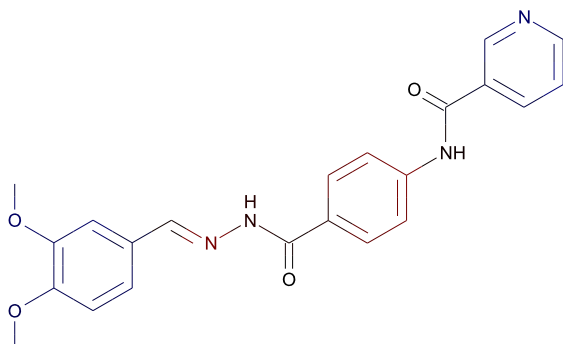

$C_{22}H_{20}N_4O_4$

Molecular Weight: 404.4186

ALogP: 2.284

Rotatable Bonds: 7

Acceptors: 6

Donors: 2

## Model Prediction

Prediction: Non-Mutagen

Probability: 0.714

Enrichment: 1.28

Bayesian Score: -1.19

Mahalanobis Distance: 7.64

Mahalanobis Distance p-value: 0.998

Prediction: Positive if the Bayesian score is above the estimated best cutoff value from minimizing the false positive and false negative rate.

Probability: The estimated probability that the sample is in the positive category. This assumes that the Bayesian score follows a normal distribution and is different from the prediction using a cutoff.

Enrichment: An estimate of enrichment, that is, the increased likelihood (versus random) of this sample being in the category.

Bayesian Score: The standard Laplacian-modified Bayesian score.

Mahalanobis Distance: The Mahalanobis distance (MD) is the distance to the center of the training data. The larger the MD, the less trustworthy the prediction.

Mahalanobis Distance p-value: The p-value gives the fraction of training data with an MD greater than or equal to the one for the given sample, assuming normally distributed data. The smaller the p-value, the less trustworthy the prediction. For highly non-normal X properties (e.g., fingerprints), the MD p-value is wildly inaccurate.

## Structural Similar Compounds

| Name               | HYCANTHONE N-OXIDE | Delavirdine                                                                                                          | 458-37-7                                         |
|--------------------|--------------------|----------------------------------------------------------------------------------------------------------------------|--------------------------------------------------|
| Structure          |                    |                                                                                                                      |                                                  |
| Actual Endpoint    | Mutagen            | Non-Mutagen                                                                                                          | Non-Mutagen                                      |
| Predicted Endpoint | Mutagen            | Non-Mutagen                                                                                                          | Non-Mutagen                                      |
| Distance           | 0.564              | 0.573                                                                                                                | 0.578                                            |
| Reference          | EMIC               | Contrera, J.F., Matthews, E.J., Kruhlak, N.L., and Benz, R.D., Regulatory Toxicology and Pharmacology 2005, 313-323. | Kazius et. al., J. Med. Chem. (2005) 48, 312-320 |

## Model Applicability

Unknown features are fingerprint features in the query molecule, but not found or appearing too infrequently in the training set.

1. All properties and OPS components are within expected ranges.

## Feature Contribution

### Top features for positive contribution

| Fingerprint | Bit/Smiles | Feature Structure                                               | Score | Mutagen in training set |
|-------------|------------|-----------------------------------------------------------------|-------|-------------------------|
| SCFP_12     | 555539852  | <br>[*]:[cH]:[c](:[cH]:[*])C(=O)N[c]1:[cH]:[cH]:[*]:[cH]:[cH]:1 | 0.447 | 22 out of 24            |



|                                        |            |                                                                                                                                                              |        |                         |
|----------------------------------------|------------|--------------------------------------------------------------------------------------------------------------------------------------------------------------|--------|-------------------------|
| SCFP_12                                | 2037424534 | 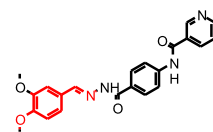<br><chem>[*]O[c]1:[cH]:[cH]:[c] (\C=N\[*]):[cH]:[c] :1[*]</chem>         | 0.442  | 13 out of 14            |
| SCFP_12                                | 818445224  | <br><chem>[*][c]1:[cH]:[cH]:[c] (NC(=O)[c](:[*]):[*] ):[cH]:[cH]:1</chem> | 0.434  | 12 out of 13            |
| Top Features for negative contribution |            |                                                                                                                                                              |        |                         |
| Fingerprint                            | Bit/Smiles | Feature Structure                                                                                                                                            | Score  | Mutagen in training set |
| SCFP_12                                | 1538617933 | <br><chem>[*][c](:[*]):[c](\C=N \NC(=O)[c](:[*]):[*] ):[cH]:[*]</chem>    | -0.762 | 0 out of 2              |
| SCFP_12                                | 1165971455 | <br><chem>[*]NC(=O)[c]1:[cH]:[c H]:[cH]:n:[cH]:1</chem>                 | -0.762 | 0 out of 2              |
| SCFP_12                                | 903335088  | <br><chem>[*]NC(=O)[c]1:[cH]:[c H]:[*]:n:[cH]:1</chem>                  | -0.762 | 0 out of 2              |



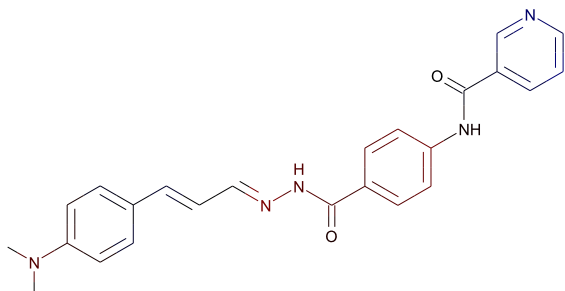

$C_{24}H_{23}N_5O_2$

Molecular Weight: 413.47172

ALogP: 2.839

Rotatable Bonds: 7

Acceptors: 5

Donors: 2

## Model Prediction

**Prediction: Mutagen**

Probability: 0.765

Enrichment: 1.37

Bayesian Score: 1.46

Mahalanobis Distance: 9.67

Mahalanobis Distance p-value: 0.493

Prediction: Positive if the Bayesian score is above the estimated best cutoff value from minimizing the false positive and false negative rate.

Probability: The estimated probability that the sample is in the positive category. This assumes that the Bayesian score follows a normal distribution and is different from the prediction using a cutoff.

Enrichment: An estimate of enrichment, that is, the increased likelihood (versus random) of this sample being in the category.

Bayesian Score: The standard Laplacian-modified Bayesian score.

Mahalanobis Distance: The Mahalanobis distance (MD) is the distance to the center of the training data. The larger the MD, the less trustworthy the prediction.

Mahalanobis Distance p-value: The p-value gives the fraction of training data with an MD greater than or equal to the one for the given sample, assuming normally distributed data. The smaller the p-value, the less trustworthy the prediction. For highly non-normal X properties (e.g., fingerprints), the MD p-value is wildly inaccurate.

## Structural Similar Compounds

| Name               | HYCANTHONE N-OXIDE | 54484-90-1                                       | HYCANTHONE |
|--------------------|--------------------|--------------------------------------------------|------------|
| Structure          |                    |                                                  |            |
| Actual Endpoint    | Mutagen            | Mutagen                                          | Mutagen    |
| Predicted Endpoint | Mutagen            | Mutagen                                          | Mutagen    |
| Distance           | 0.541              | 0.546                                            | 0.572      |
| Reference          | EMIC               | Kazius et. al., J. Med. Chem. (2005) 48, 312-320 | EMIC       |

## Model Applicability

Unknown features are fingerprint features in the query molecule, but not found or appearing too infrequently in the training set.

1. All properties and OPS components are within expected ranges.

## Feature Contribution

### Top features for positive contribution

| Fingerprint | Bit/Smiles | Feature Structure                                                      | Score | Mutagen in training set |
|-------------|------------|------------------------------------------------------------------------|-------|-------------------------|
| SCFP_12     | 2016450626 | <br><chem>[*]C=C([c]1:[cH]:[cH]:[c]([c]1:[cH]:[cH]:1)N([*])[*])</chem> | 0.474 | 41 out of 44            |



|                                        |            |                                                                                                                                                                         |        |                         |
|----------------------------------------|------------|-------------------------------------------------------------------------------------------------------------------------------------------------------------------------|--------|-------------------------|
| SCFP_12                                | 555539852  | 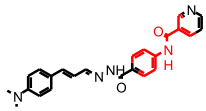<br><chem>[*]:[cH]:[c](:[cH]):[*]<br/> )]C(=O)N[c]1:[cH]:[cH]:[*]:[cH]:[cH]:1</chem> | 0.447  | 22 out of 24            |
| SCFP_12                                | 818445224  | <br><chem>[*][c]1:[cH]:[cH]:[c]<br/> (NC(=O)[c](:[*]):[*]<br/> ):[cH]:[cH]:1</chem>  | 0.434  | 12 out of 13            |
| Top Features for negative contribution |            |                                                                                                                                                                         |        |                         |
| Fingerprint                            | Bit/Smiles | Feature Structure                                                                                                                                                       | Score  | Mutagen in training set |
| SCFP_12                                | 903335088  | <br><chem>[*]NC(=O)[c]1:[cH]:[cH]:[cH]:[*]:n:[cH]:1</chem>                           | -0.762 | 0 out of 2              |
| SCFP_12                                | 1165971455 | <br><chem>[*]NC(=O)[c]1:[cH]:[cH]:[cH]:[cH]:n:[cH]:1</chem>                        | -0.762 | 0 out of 2              |
| SCFP_12                                | -105808146 | <br><chem>[*][c]1:[cH]:[cH]:[cH]:[cH]:n:[cH]:1</chem>                              | -0.411 | 8 out of 22             |



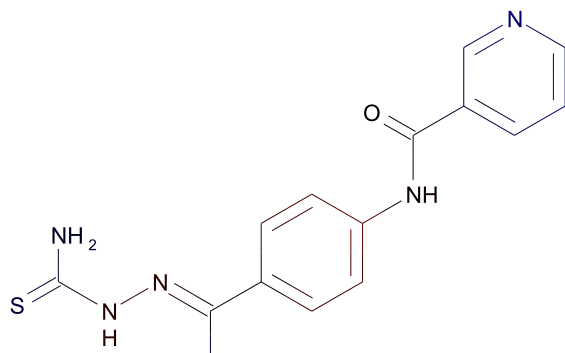

$C_{15}H_{15}N_5OS$

Molecular Weight: 313.3775

ALogP: 1.414

Rotatable Bonds: 5

Acceptors: 4

Donors: 3

## Model Prediction

Prediction: Non-Mutagen

Probability: 0.7

Enrichment: 1.25

Bayesian Score: -1.77

Mahalanobis Distance: 13.8

Mahalanobis Distance p-value: 1.99e-008

Prediction: Positive if the Bayesian score is above the estimated best cutoff value from minimizing the false positive and false negative rate.

Probability: The estimated probability that the sample is in the positive category. This assumes that the Bayesian score follows a normal distribution and is different from the prediction using a cutoff.

Enrichment: An estimate of enrichment, that is, the increased likelihood (versus random) of this sample being in the category.

Bayesian Score: The standard Laplacian-modified Bayesian score.

Mahalanobis Distance: The Mahalanobis distance (MD) is the distance to the center of the training data. The larger the MD, the less trustworthy the prediction.

Mahalanobis Distance p-value: The p-value gives the fraction of training data with an MD greater than or equal to the one for the given sample, assuming normally distributed data. The smaller the p-value, the less trustworthy the prediction. For highly non-normal X properties (e.g., fingerprints), the MD p-value is wildly inaccurate.

## Structural Similar Compounds

| Name               | Furosemide                                | CHLORAMPHENICOL | 134-90-7                                         |
|--------------------|-------------------------------------------|-----------------|--------------------------------------------------|
| Structure          |                                           |                 |                                                  |
| Actual Endpoint    | Non-Mutagen                               | Non-Mutagen     | Mutagen                                          |
| Predicted Endpoint | Non-Mutagen                               | Non-Mutagen     | Non-Mutagen                                      |
| Distance           | 0.557                                     | 0.557           | 0.557                                            |
| Reference          | Environ. Mol. Mut. 16(Suppl 18):1-14;1990 | EMIC            | Kazius et. al., J. Med. Chem. (2005) 48, 312-320 |

## Model Applicability

Unknown features are fingerprint features in the query molecule, but not found or appearing too infrequently in the training set.

1. All properties and OPS components are within expected ranges.

## Feature Contribution

### Top features for positive contribution

| Fingerprint | Bit/Smiles | Feature Structure                                                     | Score | Mutagen in training set |
|-------------|------------|-----------------------------------------------------------------------|-------|-------------------------|
| SCFP_12     | 555539852  | <br>[*]:[cH]:[c](:[cH]):[*]<br>])C(=O)N[c]1:[cH]:[cH]:[*]:[cH]:[cH]:1 | 0.447 | 22 out of 24            |



|                                        |            |                                                                                                                                                           |        |                         |
|----------------------------------------|------------|-----------------------------------------------------------------------------------------------------------------------------------------------------------|--------|-------------------------|
| SCFP_12                                | 827404948  | 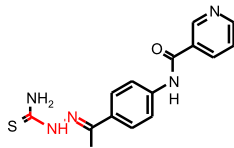<br><chem>[*]C(=[*])NN=[*]</chem>                                      | 0.442  | 5 out of 5              |
| SCFP_12                                | 818445224  | <br><chem>[*][c]1:[cH]:[cH]:[c](NC(=O)[c](:[*]):[*])[cH]:[cH]:1</chem> | 0.434  | 12 out of 13            |
| Top Features for negative contribution |            |                                                                                                                                                           |        |                         |
| Fingerprint                            | Bit/Smiles | Feature Structure                                                                                                                                         | Score  | Mutagen in training set |
| SCFP_12                                | 382734644  | <br><chem>[*]NC(=S)N</chem>                                            | -0.811 | 3 out of 14             |
| SCFP_12                                | 1165971455 | <br><chem>[*]NC(=O)[c]1:[cH]:[cH]:[cH]:[cH]:n:[cH]:1</chem>           | -0.762 | 0 out of 2              |
| SCFP_12                                | -331724199 | <br><chem>[*]N=C(/C)[c](:[*]):[*]</chem>                             | -0.762 | 0 out of 2              |



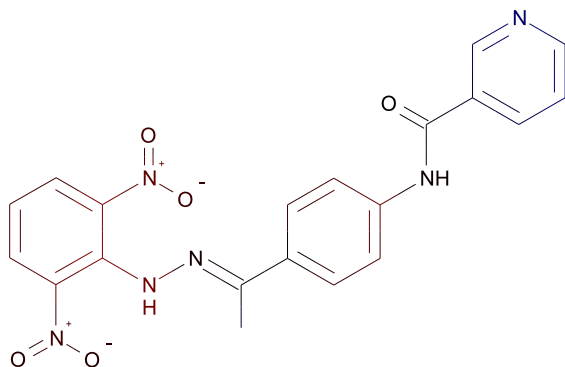

$C_{20}H_{16}N_6O_5$

Molecular Weight: 420.37824

ALogP: 2.852

Rotatable Bonds: 7

Acceptors: 8

Donors: 2

## Model Prediction

**Prediction: Mutagen**

Probability: 0.782

Enrichment: 1.4

Bayesian Score: 2.71

Mahalanobis Distance: 8.16

Mahalanobis Distance p-value: 0.985

Prediction: Positive if the Bayesian score is above the estimated best cutoff value from minimizing the false positive and false negative rate.

Probability: The estimated probability that the sample is in the positive category. This assumes that the Bayesian score follows a normal distribution and is different from the prediction using a cutoff.

Enrichment: An estimate of enrichment, that is, the increased likelihood (versus random) of this sample being in the category.

Bayesian Score: The standard Laplacian-modified Bayesian score.

Mahalanobis Distance: The Mahalanobis distance (MD) is the distance to the center of the training data. The larger the MD, the less trustworthy the prediction.

Mahalanobis Distance p-value: The p-value gives the fraction of training data with an MD greater than or equal to the one for the given sample, assuming normally distributed data. The smaller the p-value, the less trustworthy the prediction. For highly non-normal X properties (e.g., fingerprints), the MD p-value is wildly inaccurate.

## Structural Similar Compounds

| Name               | 33372-39-3                                       | 6358-31-2                                        | C.I. Pigment Yellow 74 |
|--------------------|--------------------------------------------------|--------------------------------------------------|------------------------|
| Structure          |                                                  |                                                  |                        |
| Actual Endpoint    | Mutagen                                          | Non-Mutagen                                      | Non-Mutagen            |
| Predicted Endpoint | Mutagen                                          | Non-Mutagen                                      | Non-Mutagen            |
| Distance           | 0.573                                            | 0.575                                            | 0.585                  |
| Reference          | Kazius et. al., J. Med. Chem. (2005) 48, 312-320 | Kazius et. al., J. Med. Chem. (2005) 48, 312-320 | EMIC                   |

## Model Applicability

Unknown features are fingerprint features in the query molecule, but not found or appearing too infrequently in the training set.

1. All properties and OPS components are within expected ranges.

## Feature Contribution

### Top features for positive contribution

| Fingerprint | Bit/Smiles | Feature Structure                                             | Score | Mutagen in training set |
|-------------|------------|---------------------------------------------------------------|-------|-------------------------|
| SCFP_12     | -990000384 | <br>[*]N[c]1:[c]([*]):[*]<br>:[cH]:[cH]:[c]:1[N+]<br>(=O)[O-] | 0.507 | 50 out of 52            |



| SCFP_12                                | 555539852  | 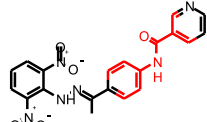<br><chem>[*]:[cH]:[c](:[cH]:[*])C(=O)N[c]1:[cH]:[cH]:[*]:[cH]:[cH]:1</chem> | 0.447  | 22 out of 24            |
|----------------------------------------|------------|-----------------------------------------------------------------------------------------------------------------------------------------------------------------|--------|-------------------------|
| SCFP_12                                | 818445224  | <br><chem>[*][c]1:[cH]:[cH]:[c](NC(=O)[c](:[*]):[*])[cH]:[cH]:1</chem>       | 0.434  | 12 out of 13            |
| Top Features for negative contribution |            |                                                                                                                                                                 |        |                         |
| Fingerprint                            | Bit/Smiles | Feature Structure                                                                                                                                               | Score  | Mutagen in training set |
| SCFP_12                                | 1165971455 | <br><chem>[*]NC(=O)[c]1:[cH]:[cH]:[cH]:[cH]:n:[cH]:1</chem>                  | -0.762 | 0 out of 2              |
| SCFP_12                                | -331724199 | <br><chem>[*]N=C(/C)\[c](:[*]):[*]</chem>                                  | -0.762 | 0 out of 2              |
| SCFP_12                                | 903335088  | <br><chem>[*]NC(=O)[c]1:[cH]:[cH]:[cH]:[cH]:n:[cH]:1</chem>                | -0.762 | 0 out of 2              |



# Sorafenib

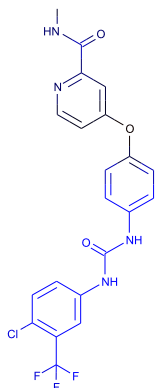

$C_{21}H_{16}ClF_3N_4O_3$

Molecular Weight: 464.82494

ALogP: 4.175

Rotatable Bonds: 6

Acceptors: 4

Donors: 3

## Model Prediction

Prediction: Non-Mutagen

Probability: 0.0531

Enrichment: 0.0951

Bayesian Score: -19.7

Mahalanobis Distance: 13.1

Mahalanobis Distance p-value: 2.73e-006

Prediction: Positive if the Bayesian score is above the estimated best cutoff value from minimizing the false positive and false negative rate.

Probability: The estimated probability that the sample is in the positive category. This assumes that the Bayesian score follows a normal distribution and is different from the prediction using a cutoff.

Enrichment: An estimate of enrichment, that is, the increased likelihood (versus random) of this sample being in the category.

Bayesian Score: The standard Laplacian-modified Bayesian score.

Mahalanobis Distance: The Mahalanobis distance (MD) is the distance to the center of the training data. The larger the MD, the less trustworthy the prediction.

Mahalanobis Distance p-value: The p-value gives the fraction of training data with an MD greater than or equal to the one for the given sample, assuming normally distributed data. The smaller the p-value, the less trustworthy the prediction. For highly non-normal X properties (e.g., fingerprints), the MD p-value is wildly inaccurate.

# TOPKAT\_Ames\_Mutagenicity

## Structural Similar Compounds

| Name               | GLYBURIDE   | 38914-96-4                                       | 93957-54-1                                                                                                                                                          |
|--------------------|-------------|--------------------------------------------------|---------------------------------------------------------------------------------------------------------------------------------------------------------------------|
| Structure          |             |                                                  |                                                                                                                                                                     |
| Actual Endpoint    | Non-Mutagen | Mutagen                                          | Non-Mutagen                                                                                                                                                         |
| Predicted Endpoint | Non-Mutagen | Mutagen                                          | Non-Mutagen                                                                                                                                                         |
| Distance           | 0.590       | 0.592                                            | 0.600                                                                                                                                                               |
| Reference          | PDR 1994    | Kazius et. al., J. Med. Chem. (2005) 48, 312-320 | US Environmental Protection Agency at <a href="http://www.epa.gov/NCCT/dsstox/sdf_isscan_external.html">http://www.epa.gov/NCCT/dsstox/sdf_isscan_external.html</a> |

## Model Applicability

Unknown features are fingerprint features in the query molecule, but not found or appearing too infrequently in the training set.

- All properties and OPS components are within expected ranges.

## Feature Contribution

| Top features for positive contribution |            |                                                                                                                                       |       |                         |
|----------------------------------------|------------|---------------------------------------------------------------------------------------------------------------------------------------|-------|-------------------------|
| Fingerprint                            | Bit/Smiles | Feature Structure                                                                                                                     | Score | Mutagen in training set |
| SCFP_12                                | -347281112 | <br>[ <sup>*</sup> ]N[c]1:[cH]:[ <sup>*</sup> ]:[c]([ <sup>*</sup> ):[c]:[cH]:1)C([ <sup>*</sup> ])([ <sup>*</sup> ])[ <sup>*</sup> ] | 0.337 | 18 out of 22            |



| SCFP_12                                | 1208843554  | 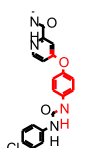<br><chem>[*]N(c1:[cH]1c2ccccc2N1):[cH]1ccccc1O1c2ccccc2N1</chem>       | 0.337 | 6 out of 7              |
|----------------------------------------|-------------|------------------------------------------------------------------------------------------------------------------------------------------------------------|-------|-------------------------|
| SCFP_12                                | -1943080297 | <br><chem>[*]N(c1:[cH]1c2ccccc2N1):[cH]1ccccc1O1c2ccccc2N1</chem>       | 0.304 | 5 out of 6              |
| Top Features for negative contribution |             |                                                                                                                                                            |       |                         |
| Fingerprint                            | Bit/Smiles  | Feature Structure                                                                                                                                          | Score | Mutagen in training set |
| SCFP_12                                | 816802409   | <br><chem>[*]NC(=O)N(c1:[cH]1c2ccccc2N1):[cH]1ccccc1O1c2ccccc2N1</chem> | -1.82 | 0 out of 9              |
| SCFP_12                                | -1903175541 | <br><chem>[*][c]([*]):[c]1ccccc1O1c2ccccc2N1</chem>                    | -1.51 | 3 out of 30             |
| SCFP_12                                | -300280774  | <br><chem>[*]:[c]([*])C(F)(F)F</chem>                                 | -1.51 | 3 out of 30             |



7a

## TOPKAT\_Mouse\_Female\_FDA\_None\_vs\_Carcinogen

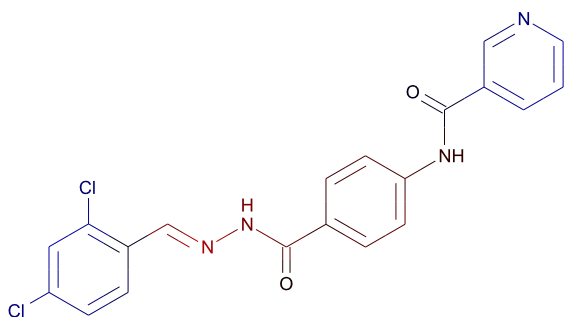C<sub>20</sub>H<sub>14</sub>Cl<sub>2</sub>N<sub>4</sub>O<sub>2</sub>

Molecular Weight: 413.25676

ALogP: 3.646

Rotatable Bonds: 5

Acceptors: 4

Donors: 2

**Model Prediction**

Prediction: Non-Carcinogen

Probability: 0.221

Enrichment: 0.691

Bayesian Score: -2.83

Mahalanobis Distance: 13.2

Mahalanobis Distance p-value: 0.000234

Prediction: Positive if the Bayesian score is above the estimated best cutoff value from minimizing the false positive and false negative rate.

Probability: The estimated probability that the sample is in the positive category. This assumes that the Bayesian score follows a normal distribution and is different from the prediction using a cutoff.

Enrichment: An estimate of enrichment, that is, the increased likelihood (versus random) of this sample being in the category.

Bayesian Score: The standard Laplacian-modified Bayesian score.

Mahalanobis Distance: The Mahalanobis distance (MD) is the distance to the center of the training data. The larger the MD, the less trustworthy the prediction.

Mahalanobis Distance p-value: The p-value gives the fraction of training data with an MD greater than or equal to the one for the given sample, assuming normally distributed data. The smaller the p-value, the less trustworthy the prediction. For highly non-normal X properties (e.g., fingerprints), the MD p-value is wildly inaccurate.

**Structural Similar Compounds**

| Name               | Bicalutamide                                                        | Indomethacin                                                        | Indapamide                                                          |
|--------------------|---------------------------------------------------------------------|---------------------------------------------------------------------|---------------------------------------------------------------------|
| Structure          |                                                                     |                                                                     |                                                                     |
| Actual Endpoint    | Non-Carcinogen                                                      | Non-Carcinogen                                                      | Non-Carcinogen                                                      |
| Predicted Endpoint | Non-Carcinogen                                                      | Non-Carcinogen                                                      | Non-Carcinogen                                                      |
| Distance           | 0.610                                                               | 0.634                                                               | 0.642                                                               |
| Reference          | US FDA (Centre for Drug Eval.& Res./Off. Testing & Res.) Sept. 1997 | US FDA (Centre for Drug Eval.& Res./Off. Testing & Res.) Sept. 1997 | US FDA (Centre for Drug Eval.& Res./Off. Testing & Res.) Sept. 1997 |

**Model Applicability**

Unknown features are fingerprint features in the query molecule, but not found or appearing too infrequently in the training set.

1. All properties and OPS components are within expected ranges.
2. Unknown ECFP\_2 feature: 1335702447: [\*][c](:[\*]):[c](C=[\*]):c:[\*]

**Feature Contribution****Top features for positive contribution**

| Fingerprint | Bit/Smiles  | Feature Structure       | Score | Carcinogen in training set |
|-------------|-------------|-------------------------|-------|----------------------------|
| ECFP_6      | -1832102709 | <br>[*]N=C[c](:[*]):[*] | 0.742 | 5 out of 6                 |



|                                        |             |                                                                                                                                               |        |                            |
|----------------------------------------|-------------|-----------------------------------------------------------------------------------------------------------------------------------------------|--------|----------------------------|
| ECFP_6                                 | -1087070950 | 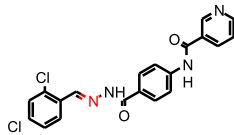<br><chem>[*]N=[*]</chem>                                  | 0.724  | 10 out of 14               |
| ECFP_6                                 | 738938915   | <br><chem>[*]C(=[*])N[c]1:[cH]:[cH]:[*]:[cH]:[cH]:1</chem> | 0.617  | 2 out of 2                 |
| Top Features for negative contribution |             |                                                                                                                                               |        |                            |
| Fingerprint                            | Bit/Smiles  | Feature Structure                                                                                                                             | Score  | Carcinogen in training set |
| ECFP_6                                 | 2013347047  | <br><chem>[*][c]1:[*]:n:[cH]:[cH]:[cH]:1</chem>            | -0.805 | 0 out of 4                 |
| ECFP_6                                 | 1335691903  | <br><chem>[*][c](:[*]):[c](Cl):[cH]:[*]</chem>            | -0.669 | 3 out of 22                |
| ECFP_6                                 | 577592657   | <br><chem>[*][c]1:[*]:[cH]:[cH]:[c](Cl):[cH]:1</chem>    | -0.586 | 3 out of 20                |



7b

## TOPKAT\_Mouse\_Female\_FDA\_None\_vs\_Carcinogen

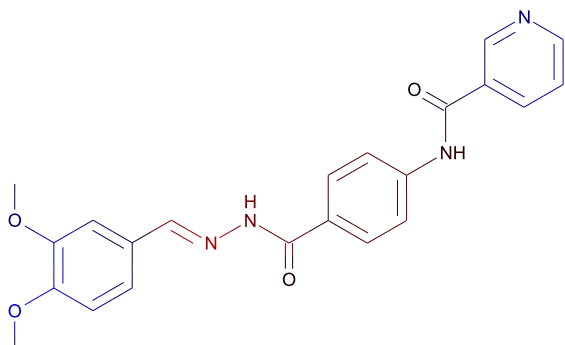C<sub>22</sub>H<sub>20</sub>N<sub>4</sub>O<sub>4</sub>

Molecular Weight: 404.4186

ALogP: 2.284

Rotatable Bonds: 7

Acceptors: 6

Donors: 2

**Model Prediction**

Prediction: Non-Carcinogen

Probability: 0.223

Enrichment: 0.695

Bayesian Score: -2.68

Mahalanobis Distance: 12

Mahalanobis Distance p-value: 0.00953

Prediction: Positive if the Bayesian score is above the estimated best cutoff value from minimizing the false positive and false negative rate.

Probability: The estimated probability that the sample is in the positive category. This assumes that the Bayesian score follows a normal distribution and is different from the prediction using a cutoff.

Enrichment: An estimate of enrichment, that is, the increased likelihood (versus random) of this sample being in the category.

Bayesian Score: The standard Laplacian-modified Bayesian score.

Mahalanobis Distance: The Mahalanobis distance (MD) is the distance to the center of the training data. The larger the MD, the less trustworthy the prediction.

Mahalanobis Distance p-value: The p-value gives the fraction of training data with an MD greater than or equal to the one for the given sample, assuming normally distributed data. The smaller the p-value, the less trustworthy the prediction. For highly non-normal X properties (e.g., fingerprints), the MD p-value is wildly inaccurate.

**Structural Similar Compounds**

| Name               | Bicalutamide                                                        | Moricizine                                                          | Alizapride                                                          |
|--------------------|---------------------------------------------------------------------|---------------------------------------------------------------------|---------------------------------------------------------------------|
| Structure          |                                                                     |                                                                     |                                                                     |
| Actual Endpoint    | Non-Carcinogen                                                      | Carcinogen                                                          | Carcinogen                                                          |
| Predicted Endpoint | Non-Carcinogen                                                      | Carcinogen                                                          | Carcinogen                                                          |
| Distance           | 0.589                                                               | 0.624                                                               | 0.627                                                               |
| Reference          | US FDA (Centre for Drug Eval.& Res./Off. Testing & Res.) Sept. 1997 | US FDA (Centre for Drug Eval.& Res./Off. Testing & Res.) Sept. 1997 | US FDA (Centre for Drug Eval.& Res./Off. Testing & Res.) Sept. 1997 |

**Model Applicability**

Unknown features are fingerprint features in the query molecule, but not found or appearing too infrequently in the training set.

1. All properties and OPS components are within expected ranges.
2. Unknown ECFP\_2 feature: -176483725: [\*]=C[c](:c:[\*]):c:[\*]

**Feature Contribution****Top features for positive contribution**

| Fingerprint | Bit/Smiles  | Feature Structure            | Score | Carcinogen in training set |
|-------------|-------------|------------------------------|-------|----------------------------|
| ECFP_6      | -1832102709 | <br>[*]\N=C[c](:c:[*]):c:[*] | 0.742 | 5 out of 6                 |



| ECFP_6                                 | -1087070950 | 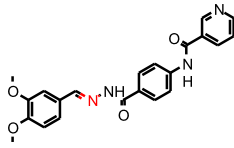<br><chem>[*]N=[*]</chem>                                   | 0.724  | 10 out of 14               |
|----------------------------------------|-------------|------------------------------------------------------------------------------------------------------------------------------------------------|--------|----------------------------|
| ECFP_6                                 | 544048674   | <br><chem>[*]C(=[*])NN=[*]</chem>                           | 0.617  | 2 out of 2                 |
| Top Features for negative contribution |             |                                                                                                                                                |        |                            |
| Fingerprint                            | Bit/Smiles  | Feature Structure                                                                                                                              | Score  | Carcinogen in training set |
| ECFP_6                                 | 2077607946  | <br><chem>[*]O[c]1:[cH]:[cH]:[c]([(*)]:[*]:[c]:1[*])</chem> | -1.15  | 0 out of 7                 |
| ECFP_6                                 | -468366781  | <br><chem>[*]O[c]1:[cH]:[*]:[c]([(*)]:[cH]:[c]:1OC</chem>  | -0.805 | 0 out of 4                 |
| ECFP_6                                 | 2013347047  | <br><chem>[*][c]1:[*]:n:[cH]:[cH]:[cH]:1</chem>           | -0.805 | 0 out of 4                 |



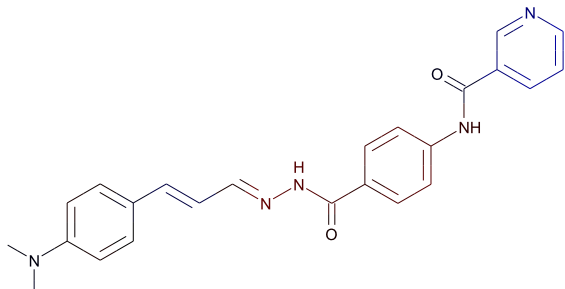

$C_{24}H_{23}N_5O_2$

Molecular Weight: 413.47172

ALogP: 2.839

Rotatable Bonds: 7

Acceptors: 5

Donors: 2

## Model Prediction

Prediction: Non-Carcinogen

Probability: 0.245

Enrichment: 0.765

Bayesian Score: -0.99

Mahalanobis Distance: 12.3

Mahalanobis Distance p-value: 0.00439

Prediction: Positive if the Bayesian score is above the estimated best cutoff value from minimizing the false positive and false negative rate.

Probability: The estimated probability that the sample is in the positive category. This assumes that the Bayesian score follows a normal distribution and is different from the prediction using a cutoff.

Enrichment: An estimate of enrichment, that is, the increased likelihood (versus random) of this sample being in the category.

Bayesian Score: The standard Laplacian-modified Bayesian score.

Mahalanobis Distance: The Mahalanobis distance (MD) is the distance to the center of the training data. The larger the MD, the less trustworthy the prediction.

Mahalanobis Distance p-value: The p-value gives the fraction of training data with an MD greater than or equal to the one for the given sample, assuming normally distributed data. The smaller the p-value, the less trustworthy the prediction. For highly non-normal X properties (e.g., fingerprints), the MD p-value is wildly inaccurate.

## Structural Similar Compounds

| Name               | Bicalutamide                                                        | Moricizine                                                          | Flecainide                                                          |
|--------------------|---------------------------------------------------------------------|---------------------------------------------------------------------|---------------------------------------------------------------------|
| Structure          |                                                                     |                                                                     |                                                                     |
| Actual Endpoint    | Non-Carcinogen                                                      | Carcinogen                                                          | Non-Carcinogen                                                      |
| Predicted Endpoint | Non-Carcinogen                                                      | Carcinogen                                                          | Non-Carcinogen                                                      |
| Distance           | 0.587                                                               | 0.638                                                               | 0.642                                                               |
| Reference          | US FDA (Centre for Drug Eval.& Res./Off. Testing & Res.) Sept. 1997 | US FDA (Centre for Drug Eval.& Res./Off. Testing & Res.) Sept. 1997 | US FDA (Centre for Drug Eval.& Res./Off. Testing & Res.) Sept. 1997 |

## Model Applicability

Unknown features are fingerprint features in the query molecule, but not found or appearing too infrequently in the training set.

1. All properties and OPS components are within expected ranges.
2. Unknown ECFP\_2 feature: -984423246: [\*]\N=C\[\*]
3. Unknown ECFP\_2 feature: -176483725: [\*]=C[c](:c:[\*]):c:[\*]

## Feature Contribution

### Top features for positive contribution

| Fingerprint | Bit/Smiles  | Feature Structure | Score | Carcinogen in training set |
|-------------|-------------|-------------------|-------|----------------------------|
| ECFP_6      | -1087070950 |                   | 0.724 | 10 out of 14               |



| ECFP_6                                 | 1814278164  | 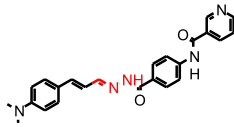<br><chem>[*]N\N=C\[*]</chem>                                   | 0.617  | 2 out of 2                 |
|----------------------------------------|-------------|----------------------------------------------------------------------------------------------------------------------------------------------------|--------|----------------------------|
| ECFP_6                                 | 738938915   | <br><chem>[*]C(=[*])N[c]1:[cH]:[cH]:[*]:[cH]:[cH]:[cH]:1</chem> | 0.617  | 2 out of 2                 |
| Top Features for negative contribution |             |                                                                                                                                                    |        |                            |
| Fingerprint                            | Bit/Smiles  | Feature Structure                                                                                                                                  | Score  | Carcinogen in training set |
| ECFP_6                                 | -1831055759 | <br><chem>[*]C=C\[c](-[*]):[*]</chem>                           | -0.805 | 0 out of 4                 |
| ECFP_6                                 | 2013347047  | <br><chem>[*][c]1:[*]:n:[cH]:[cH]:[cH]:1</chem>               | -0.805 | 0 out of 4                 |
| ECFP_6                                 | -471753896  | <br><chem>[*]\C=C\C=[*]</chem>                                | -0.482 | 0 out of 2                 |



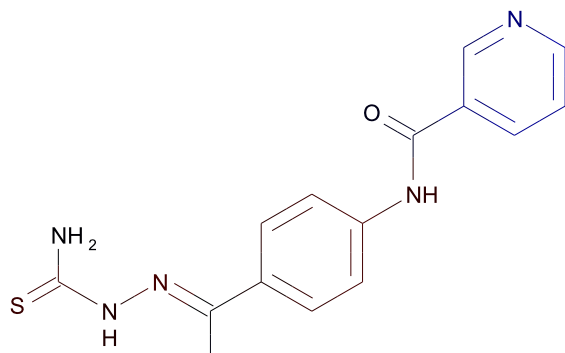C<sub>15</sub>H<sub>15</sub>N<sub>5</sub>OS

Molecular Weight: 313.3775

ALogP: 1.414

Rotatable Bonds: 5

Acceptors: 4

Donors: 3

## Model Prediction

Prediction: Carcinogen

Probability: 0.248

Enrichment: 0.774

Bayesian Score: -0.815

Mahalanobis Distance: 12.4

Mahalanobis Distance p-value: 0.00324

Prediction: Positive if the Bayesian score is above the estimated best cutoff value from minimizing the false positive and false negative rate.

Probability: The estimated probability that the sample is in the positive category. This assumes that the Bayesian score follows a normal distribution and is different from the prediction using a cutoff.

Enrichment: An estimate of enrichment, that is, the increased likelihood (versus random) of this sample being in the category.

Bayesian Score: The standard Laplacian-modified Bayesian score.

Mahalanobis Distance: The Mahalanobis distance (MD) is the distance to the center of the training data. The larger the MD, the less trustworthy the prediction.

Mahalanobis Distance p-value: The p-value gives the fraction of training data with an MD greater than or equal to the one for the given sample, assuming normally distributed data. The smaller the p-value, the less trustworthy the prediction. For highly non-normal X properties (e.g., fingerprints), the MD p-value is wildly inaccurate.

## Structural Similar Compounds

| Name               | Furosemide                                                          | Tolbutamide                                                         | Sotalol                                                             |
|--------------------|---------------------------------------------------------------------|---------------------------------------------------------------------|---------------------------------------------------------------------|
| Structure          |                                                                     |                                                                     |                                                                     |
| Actual Endpoint    | Carcinogen                                                          | Non-Carcinogen                                                      | Non-Carcinogen                                                      |
| Predicted Endpoint | Carcinogen                                                          | Non-Carcinogen                                                      | Non-Carcinogen                                                      |
| Distance           | 0.568                                                               | 0.573                                                               | 0.621                                                               |
| Reference          | US FDA (Centre for Drug Eval.& Res./Off. Testing & Res.) Sept. 1997 | US FDA (Centre for Drug Eval.& Res./Off. Testing & Res.) Sept. 1997 | US FDA (Centre for Drug Eval.& Res./Off. Testing & Res.) Sept. 1997 |

## Model Applicability

Unknown features are fingerprint features in the query molecule, but not found or appearing too infrequently in the training set.

1. All properties and OPS components are within expected ranges.
2. Unknown ECFP\_2 feature: 128986386: [\*]N=C(/C)[c](:[\*]):[\*]
3. Unknown ECFP\_2 feature: 560380707: [\*]NN=C([\*])[\*]
4. Unknown ECFP\_2 feature: -571028867: [\*]NC(=S)N

## Feature Contribution

### Top features for positive contribution

| Fingerprint | Bit/Smiles  | Feature Structure | Score | Carcinogen in training set |
|-------------|-------------|-------------------|-------|----------------------------|
| ECFP_6      | -1087070950 | <br>[*]N=[*]      | 0.724 | 10 out of 14               |



|                                        |             |                                                                                                                                  |        |                            |
|----------------------------------------|-------------|----------------------------------------------------------------------------------------------------------------------------------|--------|----------------------------|
| ECFP_6                                 | -845108448  | 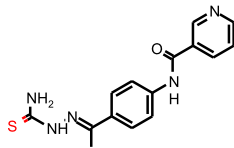 <p>[*]=S</p>                                 | 0.675  | 4 out of 5                 |
| ECFP_6                                 | 738938915   |  <p>[*]C(=[*])N[c]1:[cH]:[cH]:[cH]:[cH]:1</p> | 0.617  | 2 out of 2                 |
| Top Features for negative contribution |             |                                                                                                                                  |        |                            |
| Fingerprint                            | Bit/Smiles  | Feature Structure                                                                                                                | Score  | Carcinogen in training set |
| ECFP_6                                 | 2013347047  |  <p>[*][c]1:[*]:n:[cH]:[cH]:[cH]:1</p>        | -0.805 | 0 out of 4                 |
| ECFP_6                                 | 764951226   |  <p>[*]1:[cH]:[cH]:[cH]:n:[cH]:1</p>        | -0.482 | 0 out of 2                 |
| ECFP_6                                 | -1818873508 |  <p>[*][c]1:[cH]:[cH]:[cH]:n:[cH]:1</p>     | -0.482 | 0 out of 2                 |



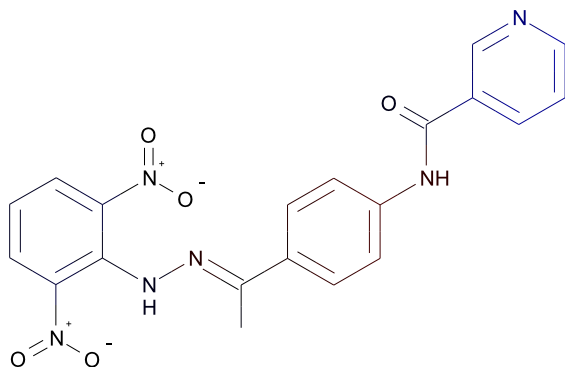

$C_{20}H_{16}N_6O_5$

Molecular Weight: 420.37824

ALogP: 2.852

Rotatable Bonds: 7

Acceptors: 8

Donors: 2

## Model Prediction

Prediction: Non-Carcinogen

Probability: 0.217

Enrichment: 0.676

Bayesian Score: -3.36

Mahalanobis Distance: 12

Mahalanobis Distance p-value: 0.011

Prediction: Positive if the Bayesian score is above the estimated best cutoff value from minimizing the false positive and false negative rate.

Probability: The estimated probability that the sample is in the positive category. This assumes that the Bayesian score follows a normal distribution and is different from the prediction using a cutoff.

Enrichment: An estimate of enrichment, that is, the increased likelihood (versus random) of this sample being in the category.

Bayesian Score: The standard Laplacian-modified Bayesian score.

Mahalanobis Distance: The Mahalanobis distance (MD) is the distance to the center of the training data. The larger the MD, the less trustworthy the prediction.

Mahalanobis Distance p-value: The p-value gives the fraction of training data with an MD greater than or equal to the one for the given sample, assuming normally distributed data. The smaller the p-value, the less trustworthy the prediction. For highly non-normal X properties (e.g., fingerprints), the MD p-value is wildly inaccurate.

## Structural Similar Compounds

| Name               | Sulfasalazine                                                       | Nedocromil                                                          | Nisoldipine                                                         |
|--------------------|---------------------------------------------------------------------|---------------------------------------------------------------------|---------------------------------------------------------------------|
| Structure          |                                                                     |                                                                     |                                                                     |
| Actual Endpoint    | Carcinogen                                                          | Non-Carcinogen                                                      | Non-Carcinogen                                                      |
| Predicted Endpoint | Carcinogen                                                          | Non-Carcinogen                                                      | Non-Carcinogen                                                      |
| Distance           | 0.624                                                               | 0.635                                                               | 0.691                                                               |
| Reference          | US FDA (Centre for Drug Eval.& Res./Off. Testing & Res.) Sept. 1997 | US FDA (Centre for Drug Eval.& Res./Off. Testing & Res.) Sept. 1997 | US FDA (Centre for Drug Eval.& Res./Off. Testing & Res.) Sept. 1997 |

## Model Applicability

Unknown features are fingerprint features in the query molecule, but not found or appearing too infrequently in the training set.

1. All properties and OPS components are within expected ranges.
2. Unknown ECFP\_2 feature: 1043790491: [\*][N+](=[\*])[\*]
3. Unknown ECFP\_2 feature: 781519895: [\*][O-]
4. Unknown ECFP\_2 feature: 128986386: [\*]N=C(/C)\[c](:[\*]):[\*]
5. Unknown ECFP\_2 feature: 560380707: [\*]NN=C([\*])[\*]
6. Unknown ECFP\_2 feature: -1236714312: [\*]=NN[c](:[\*]):[\*]
7. Unknown ECFP\_2 feature: -1956535100: [\*][c](:[\*]):[c]([N+](=[\*])[\*]):c:[\*]
8. Unknown ECFP\_2 feature: -215026467: [\*]:[c](:[\*])[N+](=O)[O-]
9. Unknown ECFP\_2 feature: 2104376220: [\*][N+](=O)[\*]
10. Unknown ECFP\_2 feature: -659271057: [\*][N+](=[\*])[O-]

## Feature Contribution

### Top features for positive contribution

| Fingerprint | Bit/Smiles | Feature Structure | Score | Carcinogen in training set |
|-------------|------------|-------------------|-------|----------------------------|
|-------------|------------|-------------------|-------|----------------------------|



|                                        |             |                                                                                                                                                    |        |                            |
|----------------------------------------|-------------|----------------------------------------------------------------------------------------------------------------------------------------------------|--------|----------------------------|
| ECFP_6                                 | -1087070950 | 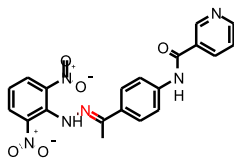<br><chem>[*]N=[*]</chem>                                       | 0.724  | 10 out of 14               |
| ECFP_6                                 | 738938915   | <br><chem>[*]C(=[*])N[c]1:[cH]:[cH]:[*]:[cH]:[cH]:[cH]:1</chem> | 0.617  | 2 out of 2                 |
| ECFP_6                                 | -177077903  | <br><chem>[*]N[c](:[cH]:[*]):[cH]:[*]</chem>                    | 0.279  | 4 out of 9                 |
| Top Features for negative contribution |             |                                                                                                                                                    |        |                            |
| Fingerprint                            | Bit/Smiles  | Feature Structure                                                                                                                                  | Score  | Carcinogen in training set |
| ECFP_6                                 | 2013347047  | <br><chem>[*][c]1:[*]:n:[cH]:[cH]:[cH]:1</chem>                | -0.805 | 0 out of 4                 |
| ECFP_6                                 | 2007300961  | <br><chem>[*][c]1:[*]:[c]([*]):[cH]:[cH]:[cH]:1</chem>        | -0.652 | 5 out of 34                |



|        |           |                                                                                                                                                                                                                                                                                      |        |            |
|--------|-----------|--------------------------------------------------------------------------------------------------------------------------------------------------------------------------------------------------------------------------------------------------------------------------------------|--------|------------|
| ECFP_6 | 764951226 | 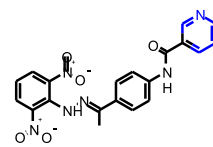 <p>Chemical structure showing a benzene ring with a nitro group (NO<sub>2</sub>) and an amine group (NH) connected to a pyridine ring via a linker.</p> <p>[*]1:[cH]:[cH]:[cH]:n<br/>:[cH]:1</p> | -0.482 | 0 out of 2 |
|--------|-----------|--------------------------------------------------------------------------------------------------------------------------------------------------------------------------------------------------------------------------------------------------------------------------------------|--------|------------|



# Sorafenib

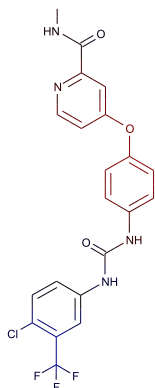

$C_{21}H_{16}ClF_3N_4O_3$

Molecular Weight: 464.82494

ALogP: 4.175

Rotatable Bonds: 6

Acceptors: 4

Donors: 3

## Model Prediction

Prediction: Carcinogen

Probability: 0.257

Enrichment: 0.801

Bayesian Score: -0.321

Mahalanobis Distance: 14.9

Mahalanobis Distance p-value: 4.21e-007

Prediction: Positive if the Bayesian score is above the estimated best cutoff value from minimizing the false positive and false negative rate.

Probability: The estimated probability that the sample is in the positive category. This assumes that the Bayesian score follows a normal distribution and is different from the prediction using a cutoff.

Enrichment: An estimate of enrichment, that is, the increased likelihood (versus random) of this sample being in the category.

Bayesian Score: The standard Laplacian-modified Bayesian score.

Mahalanobis Distance: The Mahalanobis distance (MD) is the distance to the center of the training data. The larger the MD, the less trustworthy the prediction.

Mahalanobis Distance p-value: The p-value gives the fraction of training data with an MD greater than or equal to the one for the given sample, assuming normally distributed data. The smaller the p-value, the less trustworthy the prediction. For highly non-normal X properties (e.g., fingerprints), the MD p-value is wildly inaccurate.

# TOPKAT\_Mouse\_Female\_FDA\_None\_vs\_Carcinogen

## Structural Similar Compounds

| Name               | Glimepiride                                                         | Glyburide                                                           | Fluvastatin                                                         |
|--------------------|---------------------------------------------------------------------|---------------------------------------------------------------------|---------------------------------------------------------------------|
| Structure          |                                                                     |                                                                     |                                                                     |
| Actual Endpoint    | Carcinogen                                                          | Non-Carcinogen                                                      | Non-Carcinogen                                                      |
| Predicted Endpoint | Carcinogen                                                          | Non-Carcinogen                                                      | Non-Carcinogen                                                      |
| Distance           | 0.605                                                               | 0.615                                                               | 0.625                                                               |
| Reference          | US FDA (Centre for Drug Eval.& Res./Off. Testing & Res.) Sept. 1997 | US FDA (Centre for Drug Eval.& Res./Off. Testing & Res.) Sept. 1997 | US FDA (Centre for Drug Eval.& Res./Off. Testing & Res.) Sept. 1997 |

## Model Applicability

Unknown features are fingerprint features in the query molecule, but not found or appearing too infrequently in the training set.

- OPS PC20 out of range. Value: -3.3309. Training min, max, SD, explained variance: -3.1862, 4.4571, 1.28, 0.0167.

## Feature Contribution

| Top features for positive contribution |            |                                                   |       |                            |
|----------------------------------------|------------|---------------------------------------------------|-------|----------------------------|
| Fingerprint                            | Bit/Smiles | Feature Structure                                 | Score | Carcinogen in training set |
| ECFP_6                                 | 738938915  | <br>[*]C(=[*])N[*]F.[cH]:<br>[cH]:[*]:[cH]:[cH]:1 | 0.617 | 2 out of 2                 |







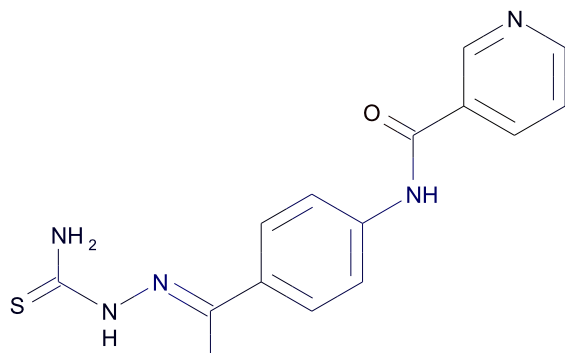

$C_{15}H_{15}N_5OS$

Molecular Weight: 313.3775

ALogP: 1.414

Rotatable Bonds: 5

Acceptors: 4

Donors: 3

## Model Prediction

Prediction: Single-Carcinogen

Probability: 0.221

Enrichment: 0.538

Bayesian Score: -8.6

Mahalanobis Distance: 11.8

Mahalanobis Distance p-value: 0.000561

Prediction: Positive if the Bayesian score is above the estimated best cutoff value from minimizing the false positive and false negative rate.

Probability: The estimated probability that the sample is in the positive category. This assumes that the Bayesian score follows a normal distribution and is different from the prediction using a cutoff.

Enrichment: An estimate of enrichment, that is, the increased likelihood (versus random) of this sample being in the category.

Bayesian Score: The standard Laplacian-modified Bayesian score.

Mahalanobis Distance: The Mahalanobis distance (MD) is the distance to the center of the training data. The larger the MD, the less trustworthy the prediction.

Mahalanobis Distance p-value: The p-value gives the fraction of training data with an MD greater than or equal to the one for the given sample, assuming normally distributed data. The smaller the p-value, the less trustworthy the prediction. For highly non-normal X properties (e.g., fingerprints), the MD p-value is wildly inaccurate.

## Structural Similar Compounds

| Name               | Furosemide                                                          | Sulfamethazine                                                      | Guanabenz                                                           |
|--------------------|---------------------------------------------------------------------|---------------------------------------------------------------------|---------------------------------------------------------------------|
| Structure          |                                                                     |                                                                     |                                                                     |
| Actual Endpoint    | Single-Carcinogen                                                   | Single-Carcinogen                                                   | Single-Carcinogen                                                   |
| Predicted Endpoint | Single-Carcinogen                                                   | Single-Carcinogen                                                   | Single-Carcinogen                                                   |
| Distance           | 0.564                                                               | 0.683                                                               | 0.697                                                               |
| Reference          | US FDA (Centre for Drug Eval.& Res./Off. Testing & Res.) Sept. 1997 | US FDA (Centre for Drug Eval.& Res./Off. Testing & Res.) Sept. 1997 | US FDA (Centre for Drug Eval.& Res./Off. Testing & Res.) Sept. 1997 |

## Model Applicability

Unknown features are fingerprint features in the query molecule, but not found or appearing too infrequently in the training set.

1. All properties and OPS components are within expected ranges.
2. Unknown ECFP\_2 feature: 128986386: [\*]N=C(/C)[c](:[\*]):[\*]
3. Unknown ECFP\_2 feature: 560380707: [\*]NN=C([\*])[\*]
4. Unknown ECFP\_2 feature: -571028867: [\*]NC(=S)N

## Feature Contribution

### Top features for positive contribution

| Fingerprint | Bit/Smiles | Feature Structure                     | Score | Multiple-Carcinogen in training set |
|-------------|------------|---------------------------------------|-------|-------------------------------------|
| ECFP_4      | -175146122 | <br>[*]C(=[*])[c](:[cH]:[*]):[cH]:[*] | 0.403 | 6 out of 9                          |



|                                        |             |                                                                                                                                                  |       |                                     |
|----------------------------------------|-------------|--------------------------------------------------------------------------------------------------------------------------------------------------|-------|-------------------------------------|
| ECFP_4                                 | 1430169877  | 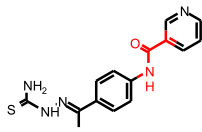<br><chem>[*]NC(=O)[c]([*]);[*]</chem>                        | 0.299 | 2 out of 3                          |
| ECFP_4                                 | 1444581947  | <br><chem>[*]C(=[*])[c]1:[cH]:[*]:[c]([*]):[cH]:[cH]:1</chem> | 0.259 | 4 out of 7                          |
| Top Features for negative contribution |             |                                                                                                                                                  |       |                                     |
| Fingerprint                            | Bit/Smiles  | Feature Structure                                                                                                                                | Score | Multiple-Carcinogen in training set |
| ECFP_4                                 | -1087070950 | <br><chem>[*]N=[*]</chem>                                     | -1.63 | 0 out of 10                         |
| ECFP_4                                 | 866218936   | <br><chem>[*]C(=[*])C</chem>                                | -1.24 | 0 out of 6                          |
| ECFP_4                                 | 888054369   | <br><chem>[*]N[c]1:[cH]:[*]:[c]([*]):[cH]:[cH]:1</chem>     | -0.8  | 0 out of 3                          |







# Sorafenib

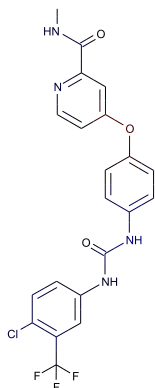
$$\text{C}_{21}\text{H}_{16}\text{ClF}_3\text{N}_4\text{O}_3$$

Molecular Weight: 464.82494

|ALogP: 4.175

Rotatable Bonds: 6

Acceptors: 4

Donors: 3

## Model Prediction

Prediction: Single-Carcinogen

Probability: 0.283

Enrichment: 0.691

Bayesian Score: -3.89

Mahalanobis Distance: 11.1

Mahalanobis Distance p-value: 0.00221

Prediction: Positive if the Bayesian score is above the estimated best cutoff value from minimizing the false positive and false negative rate.

**Probability:** The estimated probability that the sample is in the positive category. This assumes that the Bayesian score follows a normal distribution and is different from the prediction using a cutoff.

Enrichment: An estimate of enrichment, that is, the increased likelihood (versus random) of this sample being in the category.  
Bayesian Score: The standard Laplacian-modified Bayesian score.

**Mahalanobis Distance:** The Mahalanobis distance (MD) is the distance to the center of the training data. The larger the MD, the less trustworthy the prediction.

Mahalanobis Distance p-value: The p-value gives the fraction of training data with an MD greater than or equal to the one for the given sample, assuming normally distributed data. The smaller the p-value, the less trustworthy the prediction. For highly non-normal X properties (e.g., fingerprints), the MD p-value is wildly inaccurate.

## TOPKAT\_Mouse\_Female\_FDA\_Single\_vs\_Multiple

## Structural Similar Compounds

| Name               | Glimepiride                                                                         | Labetalol                                                                           | Lansoprazole                                                                        |
|--------------------|-------------------------------------------------------------------------------------|-------------------------------------------------------------------------------------|-------------------------------------------------------------------------------------|
| Structure          | 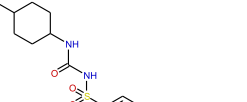 |  |  |
| Actual Endpoint    | Single-Carcinogen                                                                   | Single-Carcinogen                                                                   | Single-Carcinogen                                                                   |
| Predicted Endpoint | Single-Carcinogen                                                                   | Single-Carcinogen                                                                   | Single-Carcinogen                                                                   |
| Distance           | 0.599                                                                               | 0.808                                                                               | 0.820                                                                               |
| Reference          | US FDA (Centre for Drug Eval.& Res./Off. Testing & Res.) Sept. 1997                 | US FDA (Centre for Drug Eval.& Res./Off. Testing & Res.) Sept. 1997                 | US FDA (Centre for Drug Eval.& Res./Off. Testing & Res.) Sept. 1997                 |

## Model Applicability

Unknown features are fingerprint features in the query molecule, but not found or appearing too infrequently in the training set.

1. All properties and OPS components are within expected ranges.
2. Unknown ECFP\_2 feature: 1336678434: [\*][c](:[\*]):c(C([\*])([\*])([\*]):c[\*])
3. Unknown ECFP\_2 feature: -1952889961: [\*]:c(:[\*])C(F)(F)F

## Feature Contribution

## Top features for positive contribution

[illegible]
$$[*]:[cH]:[c](Cl)(F)C([*]):[c]([*])H:[*])$$











7a

## TOPKAT\_Mouse\_Male\_FDA\_None\_vs\_Carcinogen

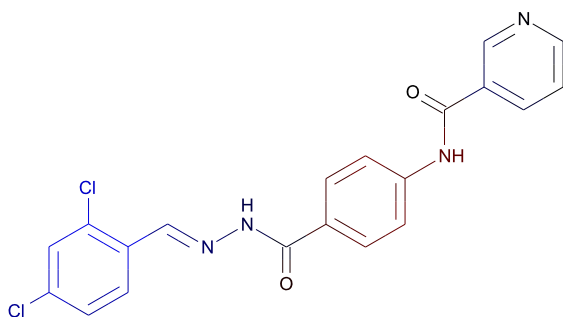C<sub>20</sub>H<sub>14</sub>Cl<sub>2</sub>N<sub>4</sub>O<sub>2</sub>

Molecular Weight: 413.25676

ALogP: 3.646

Rotatable Bonds: 5

Acceptors: 4

Donors: 2

**Model Prediction**

Prediction: Non-Carcinogen

Probability: 0.198

Enrichment: 0.672

Bayesian Score: -5.12

Mahalanobis Distance: 12.1

Mahalanobis Distance p-value: 0.00432

Prediction: Positive if the Bayesian score is above the estimated best cutoff value from minimizing the false positive and false negative rate.

Probability: The estimated probability that the sample is in the positive category. This assumes that the Bayesian score follows a normal distribution and is different from the prediction using a cutoff.

Enrichment: An estimate of enrichment, that is, the increased likelihood (versus random) of this sample being in the category.

Bayesian Score: The standard Laplacian-modified Bayesian score.

Mahalanobis Distance: The Mahalanobis distance (MD) is the distance to the center of the training data. The larger the MD, the less trustworthy the prediction.

Mahalanobis Distance p-value: The p-value gives the fraction of training data with an MD greater than or equal to the one for the given sample, assuming normally distributed data. The smaller the p-value, the less trustworthy the prediction. For highly non-normal X properties (e.g., fingerprints), the MD p-value is wildly inaccurate.

**Structural Similar Compounds**

| Name               | Bicalutamide                                                        | Indapamide                                                          | Indomethacin                                                        |
|--------------------|---------------------------------------------------------------------|---------------------------------------------------------------------|---------------------------------------------------------------------|
| Structure          |                                                                     |                                                                     |                                                                     |
| Actual Endpoint    | Carcinogen                                                          | Non-Carcinogen                                                      | Non-Carcinogen                                                      |
| Predicted Endpoint | Carcinogen                                                          | Non-Carcinogen                                                      | Non-Carcinogen                                                      |
| Distance           | 0.552                                                               | 0.614                                                               | 0.620                                                               |
| Reference          | US FDA (Centre for Drug Eval.& Res./Off. Testing & Res.) Sept. 1997 | US FDA (Centre for Drug Eval.& Res./Off. Testing & Res.) Sept. 1997 | US FDA (Centre for Drug Eval.& Res./Off. Testing & Res.) Sept. 1997 |

**Model Applicability**

Unknown features are fingerprint features in the query molecule, but not found or appearing too infrequently in the training set.

1. OPS PC16 out of range. Value: -3.2803. Training min, max, SD, explained variance: -3.1219, 5.3717, 1.291, 0.0175.

**Feature Contribution**

| Top features for positive contribution |            |                                              |       |                            |
|----------------------------------------|------------|----------------------------------------------|-------|----------------------------|
| Fingerprint                            | Bit/Smiles | Feature Structure                            | Score | Carcinogen in training set |
| FCFP_6                                 | -581879738 | <br>[*]NC(=O)[c]1:[cH]:[cH]:[cH]:[cH]:[cH]:1 | 0.77  | 4 out of 5                 |



| FCFP_6                                 | -1838187238 | 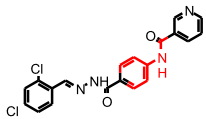<br><chem>[*]C(=[*])N[c]1:[cH]:[cH]:[cH]:[*]:1</chem>        | 0.565  | 4 out of 7                 |
|----------------------------------------|-------------|-------------------------------------------------------------------------------------------------------------------------------------------------|--------|----------------------------|
| FCFP_6                                 | 1294255210  | <br><chem>[*]C(=[*])N[c](:[*]):[*]</chem>                    | 0.441  | 12 out of 28               |
| Top Features for negative contribution |             |                                                                                                                                                 |        |                            |
| Fingerprint                            | Bit/Smiles  | Feature Structure                                                                                                                               | Score  | Carcinogen in training set |
| FCFP_6                                 | 2104062943  | <br><chem>[*][c]1:[*]:[cH]:[c]([C=[*]):[c](Cl):[cH]:1</chem> | -1.01  | 1 out of 17                |
| FCFP_6                                 | -885520711  | <br><chem>[*]C(=[*])NN=[*]</chem>                          | -0.839 | 0 out of 5                 |
| FCFP_6                                 | 555188808   | <br><chem>[*][c]1:[*]:[cH]:[c]([Cl]:[cH]:[c]:1Cl</chem>    | -0.839 | 0 out of 5                 |



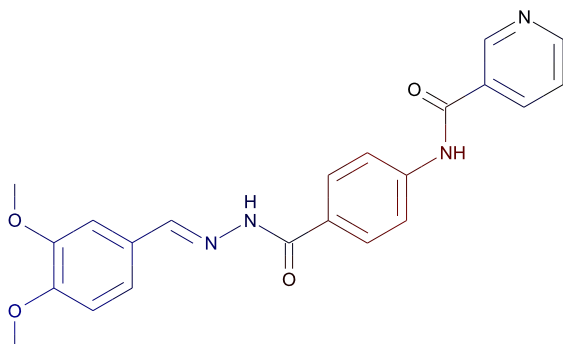
 $C_{22}H_{20}N_4O_4$ 

Molecular Weight: 404.4186

ALogP: 2.284

Rotatable Bonds: 7

Acceptors: 6

Donors: 2

## Model Prediction

Prediction: Non-Carcinogen

Probability: 0.223

Enrichment: 0.758

Bayesian Score: -3.64

Mahalanobis Distance: 13.5

Mahalanobis Distance p-value: 5.33e-005

Prediction: Positive if the Bayesian score is above the estimated best cutoff value from minimizing the false positive and false negative rate.

Probability: The estimated probability that the sample is in the positive category. This assumes that the Bayesian score follows a normal distribution and is different from the prediction using a cutoff.

Enrichment: An estimate of enrichment, that is, the increased likelihood (versus random) of this sample being in the category.

Bayesian Score: The standard Laplacian-modified Bayesian score.

Mahalanobis Distance: The Mahalanobis distance (MD) is the distance to the center of the training data. The larger the MD, the less trustworthy the prediction.

Mahalanobis Distance p-value: The p-value gives the fraction of training data with an MD greater than or equal to the one for the given sample, assuming normally distributed data. The smaller the p-value, the less trustworthy the prediction. For highly non-normal X properties (e.g., fingerprints), the MD p-value is wildly inaccurate.

## Structural Similar Compounds

| Name               | Bicalutamide                                                        | Moricizine                                                          | Cisapride                                                           |
|--------------------|---------------------------------------------------------------------|---------------------------------------------------------------------|---------------------------------------------------------------------|
| Structure          |                                                                     |                                                                     |                                                                     |
| Actual Endpoint    | Carcinogen                                                          | Non-Carcinogen                                                      | Non-Carcinogen                                                      |
| Predicted Endpoint | Carcinogen                                                          | Non-Carcinogen                                                      | Non-Carcinogen                                                      |
| Distance           | 0.573                                                               | 0.621                                                               | 0.626                                                               |
| Reference          | US FDA (Centre for Drug Eval.& Res./Off. Testing & Res.) Sept. 1997 | US FDA (Centre for Drug Eval.& Res./Off. Testing & Res.) Sept. 1997 | US FDA (Centre for Drug Eval.& Res./Off. Testing & Res.) Sept. 1997 |

## Model Applicability

Unknown features are fingerprint features in the query molecule, but not found or appearing too infrequently in the training set.

- OPS PC16 out of range. Value: -3.8728. Training min, max, SD, explained variance: -3.1219, 5.3717, 1.291, 0.0175.

## Feature Contribution

### Top features for positive contribution

| Fingerprint | Bit/Smiles | Feature Structure                       | Score | Carcinogen in training set |
|-------------|------------|-----------------------------------------|-------|----------------------------|
| FCFP_6      | -581879738 | <br>[*]NC(=O)[c]1:[cH]:[cH]:[cH]:[cH]:1 | 0.77  | 4 out of 5                 |



| FCFP_6                                 | -1838187238 | 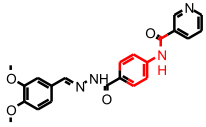<br><chem>[*]C(=[*])N[c]1:[cH]:[cH]:[cH]:[*]:[cH]:[cH]:[cH]:1</chem> | 0.565  | 4 out of 7                 |
|----------------------------------------|-------------|---------------------------------------------------------------------------------------------------------------------------------------------------------|--------|----------------------------|
| FCFP_6                                 | 1294255210  | <br><chem>[*]C(=[*])N[c](:[*]):[*]</chem>                            | 0.441  | 12 out of 28               |
| Top Features for negative contribution |             |                                                                                                                                                         |        |                            |
| Fingerprint                            | Bit/Smiles  | Feature Structure                                                                                                                                       | Score  | Carcinogen in training set |
| FCFP_6                                 | -885520711  | <br><chem>[*]C(=[*])NN=[*]</chem>                                    | -0.839 | 0 out of 5                 |
| FCFP_6                                 | -1038421835 | <br><chem>[*]O[c]1:[cH]:[c](C=[*]):[cH]:[cH]:[c]:1O</chem>          | -0.719 | 0 out of 4                 |
| FCFP_6                                 | 1028934530  | <br><chem>[*]O[c]1:[cH]:[*]:[c]([*]):[cH]:[c]:1OC</chem>           | -0.596 | 1 out of 10                |



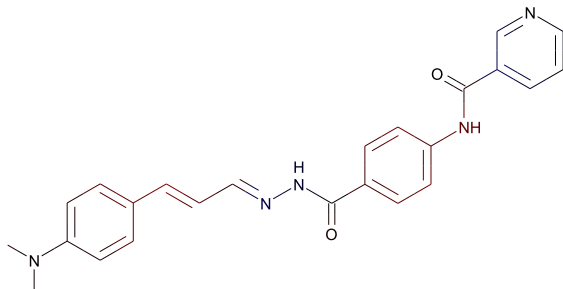
$$\text{C}_{24}\text{H}_{23}\text{N}_5\text{O}_2$$

Molecular Weight: 413.47172

|ALogP: 2.839

Rotatable Bonds: 7

Acceptors: 5

Donors: 2

## Model Prediction

**Prediction: Carcinogen**

Probability: 0.365

Enrichment: 1.24

Bayesian Score: 1.98

Mahalanobis Distance: 12.2

Mahalanobis Distance p-value: 0.00379

Prediction: Positive if the Bayesian score is above the estimated best cutoff value from minimizing the false positive and false negative rate.

Probability: The estimated probability that the sample is in the positive category. This assumes that the Bayesian score follows a normal distribution and is different from the prediction using a cutoff.

Enrichment: An estimate of enrichment, that is, the increased likelihood (versus random) of this sample being in the category.  
Bayesian Score: The standard Laplacian-modified Bayesian score.

**Mahalanobis Distance:** The Mahalanobis distance (MD) is the distance to the center of the training data. The larger the MD, the less trustworthy the prediction.

Mahalanobis Distance p-value: The p-value gives the fraction of training data with an MD greater than or equal to the one for the given sample, assuming normally distributed data. The smaller the p-value, the less trustworthy the prediction. For highly non-normal X properties (e.g., fingerprints), the MD p-value is wildly inaccurate.

## Structural Similar Compounds

| Name               | Bicalutamide                                                                        | Flecainide                                                                          | Cisapride                                                                           |
|--------------------|-------------------------------------------------------------------------------------|-------------------------------------------------------------------------------------|-------------------------------------------------------------------------------------|
| Structure          | 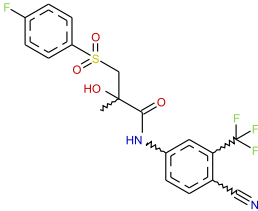 |  |  |
| Actual Endpoint    | Carcinogen                                                                          | Non-Carcinogen                                                                      | Non-Carcinogen                                                                      |
| Predicted Endpoint | Carcinogen                                                                          | Non-Carcinogen                                                                      | Non-Carcinogen                                                                      |
| Distance           | 0.568                                                                               | 0.625                                                                               | 0.625                                                                               |
| Reference          | US FDA (Centre for Drug Eval.& Res./Off. Testing & Res.) Sept. 1997                 | US FDA (Centre for Drug Eval.& Res./Off. Testing & Res.) Sept. 1997                 | US FDA (Centre for Drug Eval.& Res./Off. Testing & Res.) Sept. 1997                 |

## Model Applicability

Unknown features are fingerprint features in the query molecule, but not found or appearing too infrequently in the training set.

1. OPS PC16 out of range. Value: -3.3523. Training min, max, SD, explained variance: -3.1219, 5.3717, 1.291, 0.0175.
2. Unknown FCFP 2 feature: -2100309237: [\*]\N=C\C=[\*]

## Feature Contribution

| Top features for positive contribution |             |                                                                                                                                                 |       |                            |
|----------------------------------------|-------------|-------------------------------------------------------------------------------------------------------------------------------------------------|-------|----------------------------|
| Fingerprint                            | Bit/Smiles  | Feature Structure                                                                                                                               | Score | Carcinogen in training set |
| FCFP_6                                 | -1033057683 | 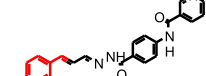<br><chem>[*]=C[c]1:[cH]:[cH]:[c]([cH]:[cH]:1)N(C)C</chem> | 0.805 | 3 out of 3                 |


  
 $[*]=C[c]1:[cH]:[cH]:[c]([:[cH]:[cH]:1)N(C)$



| FCFP_6                                 | -581879738 | 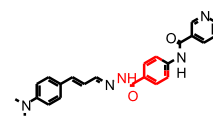<br><chem>[*]NC(=O)[c]1:[cH]:[cH]:[*]:[cH]:[cH]:1</chem> | 0.77   | 4 out of 5                 |
|----------------------------------------|------------|---------------------------------------------------------------------------------------------------------------------------------------------|--------|----------------------------|
| FCFP_6                                 | -146015125 | <br><chem>[*]=C[C=C][c]([cH]:[*]):[cH]:[*]</chem>        | 0.676  | 2 out of 2                 |
| Top Features for negative contribution |            |                                                                                                                                             |        |                            |
| Fingerprint                            | Bit/Smiles | Feature Structure                                                                                                                           | Score  | Carcinogen in training set |
| FCFP_6                                 | -885520711 | <br><chem>[*]C(=[*])NN=[*]</chem>                        | -0.839 | 0 out of 5                 |
| FCFP_6                                 | 1153798395 | <br><chem>[*]C(=[*])[c]1:[cH]:[*]:[cH]:n:[cH]:1</chem>  | -0.582 | 0 out of 3                 |
| FCFP_6                                 | 581019816  | <br><chem>[*]N\N=C\[*]</chem>                          | -0.423 | 0 out of 2                 |



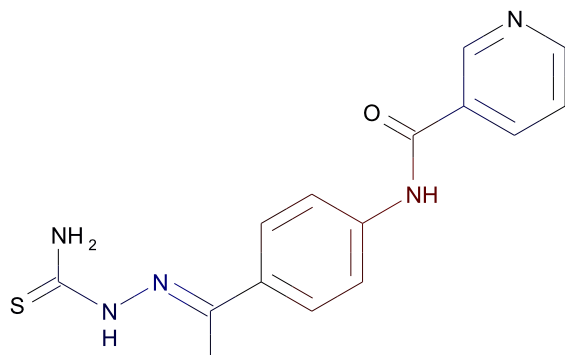C<sub>15</sub>H<sub>15</sub>N<sub>5</sub>OS

Molecular Weight: 313.3775

ALogP: 1.414

Rotatable Bonds: 5

Acceptors: 4

Donors: 3

## Model Prediction

**Prediction: Carcinogen**

Probability: 0.294

Enrichment: 0.998

Bayesian Score: -0.458

Mahalanobis Distance: 13.3

Mahalanobis Distance p-value: 0.000102

Prediction: Positive if the Bayesian score is above the estimated best cutoff value from minimizing the false positive and false negative rate.

Probability: The estimated probability that the sample is in the positive category. This assumes that the Bayesian score follows a normal distribution and is different from the prediction using a cutoff.

Enrichment: An estimate of enrichment, that is, the increased likelihood (versus random) of this sample being in the category.

Bayesian Score: The standard Laplacian-modified Bayesian score.

Mahalanobis Distance: The Mahalanobis distance (MD) is the distance to the center of the training data. The larger the MD, the less trustworthy the prediction.

Mahalanobis Distance p-value: The p-value gives the fraction of training data with an MD greater than or equal to the one for the given sample, assuming normally distributed data. The smaller the p-value, the less trustworthy the prediction. For highly non-normal X properties (e.g., fingerprints), the MD p-value is wildly inaccurate.

## Structural Similar Compounds

| Name               | Furosemide                                                          | Tolbutamide                                                         | Sotalol                                                             |
|--------------------|---------------------------------------------------------------------|---------------------------------------------------------------------|---------------------------------------------------------------------|
| Structure          |                                                                     |                                                                     |                                                                     |
| Actual Endpoint    | Non-Carcinogen                                                      | Non-Carcinogen                                                      | Non-Carcinogen                                                      |
| Predicted Endpoint | Non-Carcinogen                                                      | Non-Carcinogen                                                      | Carcinogen                                                          |
| Distance           | 0.518                                                               | 0.548                                                               | 0.553                                                               |
| Reference          | US FDA (Centre for Drug Eval.& Res./Off. Testing & Res.) Sept. 1997 | US FDA (Centre for Drug Eval.& Res./Off. Testing & Res.) Sept. 1997 | US FDA (Centre for Drug Eval.& Res./Off. Testing & Res.) Sept. 1997 |

## Model Applicability

Unknown features are fingerprint features in the query molecule, but not found or appearing too infrequently in the training set.

1. All properties and OPS components are within expected ranges.

## Feature Contribution

### Top features for positive contribution

| Fingerprint | Bit/Smiles  | Feature Structure                             | Score | Carcinogen in training set |
|-------------|-------------|-----------------------------------------------|-------|----------------------------|
| FCFP_6      | -1838187238 | <br>[*]C(=[*])N[c]1:[cH]:[cH]:[*]:[cH]:[cH]:1 | 0.565 | 4 out of 7                 |



|                                        |             |                                                                                                                                                             |        |                            |
|----------------------------------------|-------------|-------------------------------------------------------------------------------------------------------------------------------------------------------------|--------|----------------------------|
| FCFP_6                                 | 1294255210  | 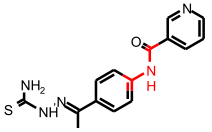<br><chem>[*]C(=[*])N[c](:[*]):</chem><br><chem>[*]</chem>               | 0.441  | 12 out of 28               |
| FCFP_6                                 | -773983804  | <br><chem>[*]N[c]1:[cH]:[*]:[c]</chem><br><chem>([*]):[cH]:[cH]:1</chem> | 0.409  | 10 out of 24               |
| Top Features for negative contribution |             |                                                                                                                                                             |        |                            |
| Fingerprint                            | Bit/Smiles  | Feature Structure                                                                                                                                           | Score  | Carcinogen in training set |
| FCFP_6                                 | -885520711  | <br><chem>[*]C(=[*])NN=[*]</chem>                                        | -0.839 | 0 out of 5                 |
| FCFP_6                                 | 1153798395  | <br><chem>[*]C(=[*])[c]1:[cH]:[</chem><br><chem>*]:[cH]:n:[cH]:1</chem> | -0.582 | 0 out of 3                 |
| FCFP_6                                 | -1549192822 | <br><chem>[*]N=C(/C)[c](:[*])</chem><br><chem>:[*]</chem>              | -0.489 | 3 out of 21                |



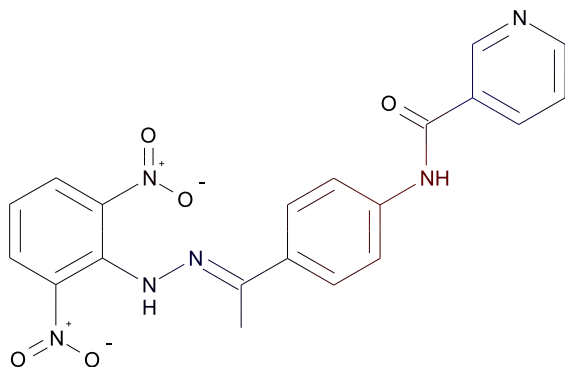

$C_{20}H_{16}N_6O_5$

Molecular Weight: 420.37824

ALogP: 2.852

Rotatable Bonds: 7

Acceptors: 8

Donors: 2

## Model Prediction

Prediction: Carcinogen

Probability: 0.29

Enrichment: 0.984

Bayesian Score: -0.612

Mahalanobis Distance: 13.2

Mahalanobis Distance p-value: 0.000151

Prediction: Positive if the Bayesian score is above the estimated best cutoff value from minimizing the false positive and false negative rate.

Probability: The estimated probability that the sample is in the positive category. This assumes that the Bayesian score follows a normal distribution and is different from the prediction using a cutoff.

Enrichment: An estimate of enrichment, that is, the increased likelihood (versus random) of this sample being in the category.

Bayesian Score: The standard Laplacian-modified Bayesian score.

Mahalanobis Distance: The Mahalanobis distance (MD) is the distance to the center of the training data. The larger the MD, the less trustworthy the prediction.

Mahalanobis Distance p-value: The p-value gives the fraction of training data with an MD greater than or equal to the one for the given sample, assuming normally distributed data. The smaller the p-value, the less trustworthy the prediction. For highly non-normal X properties (e.g., fingerprints), the MD p-value is wildly inaccurate.

## Structural Similar Compounds

| Name               | Sulfasalazine                                                       | Nedocromil                                                          | Nisoldipine                                                         |
|--------------------|---------------------------------------------------------------------|---------------------------------------------------------------------|---------------------------------------------------------------------|
| Structure          |                                                                     |                                                                     |                                                                     |
| Actual Endpoint    | Carcinogen                                                          | Non-Carcinogen                                                      | Non-Carcinogen                                                      |
| Predicted Endpoint | Carcinogen                                                          | Non-Carcinogen                                                      | Non-Carcinogen                                                      |
| Distance           | 0.596                                                               | 0.619                                                               | 0.672                                                               |
| Reference          | US FDA (Centre for Drug Eval.& Res./Off. Testing & Res.) Sept. 1997 | US FDA (Centre for Drug Eval.& Res./Off. Testing & Res.) Sept. 1997 | US FDA (Centre for Drug Eval.& Res./Off. Testing & Res.) Sept. 1997 |

## Model Applicability

Unknown features are fingerprint features in the query molecule, but not found or appearing too infrequently in the training set.

1. All properties and OPS components are within expected ranges.
2. Unknown FCFP\_2 feature: 5: [\*][O-]
3. Unknown FCFP\_2 feature: 1294285001: [\*]=NN[c](:[\*]):[\*]
4. Unknown FCFP\_2 feature: -828984032: [\*][c](:[\*]):[c]([N+](=[\*])[\*]):c:[\*]
5. Unknown FCFP\_2 feature: -1338588315: [\*]:[c](:[\*])[N+](=O)[O-]
6. Unknown FCFP\_2 feature: 1872392852: [\*][N+](=O)[\*]
7. Unknown FCFP\_2 feature: 260476081: [\*][N+](=[\*])[O-]

## Feature Contribution

### Top features for positive contribution

| Fingerprint | Bit/Smiles | Feature Structure | Score | Carcinogen in training set |
|-------------|------------|-------------------|-------|----------------------------|
|-------------|------------|-------------------|-------|----------------------------|



|                                        |             |                                                                                                                                                         |        |                            |
|----------------------------------------|-------------|---------------------------------------------------------------------------------------------------------------------------------------------------------|--------|----------------------------|
| FCFP_6                                 | -1838187238 | 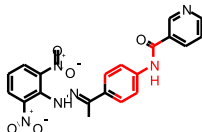<br><chem>[*]C(=[*])N[c]1:[cH]:[cH]:[cH]:[*]:[cH]:[cH]:[cH]:1</chem> | 0.565  | 4 out of 7                 |
| FCFP_6                                 | 1294255210  | <br><chem>[*]C(=[*])N[c](:[*]):[*]</chem>                            | 0.441  | 12 out of 28               |
| FCFP_6                                 | -773983804  | <br><chem>[*]N[c]1:[cH]:[*]:[c]([*]):[cH]:[cH]:1</chem>              | 0.409  | 10 out of 24               |
| Top Features for negative contribution |             |                                                                                                                                                         |        |                            |
| Fingerprint                            | Bit/Smiles  | Feature Structure                                                                                                                                       | Score  | Carcinogen in training set |
| FCFP_6                                 | 1153798395  | <br><chem>[*]C(=[*])[c]1:[cH]:[*]:[cH]:n:[cH]:1</chem>              | -0.582 | 0 out of 3                 |
| FCFP_6                                 | -1549192822 | <br><chem>[*]N=C(/C)[c](:[*]):[*]</chem>                           | -0.489 | 3 out of 21                |



|        |           |                                                                                                                  |        |            |
|--------|-----------|------------------------------------------------------------------------------------------------------------------|--------|------------|
| FCFP_6 | 581019816 | 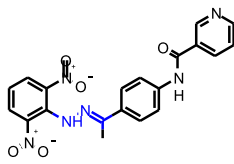<br><chem>[*]N\N=C\[*]</chem> | -0.423 | 0 out of 2 |
|--------|-----------|------------------------------------------------------------------------------------------------------------------|--------|------------|



# Sorafenib

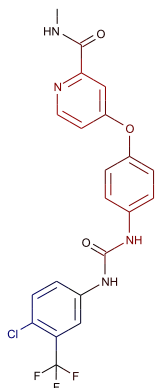

$C_{21}H_{16}ClF_3N_4O_3$

Molecular Weight: 464.82494

ALogP: 4.175

Rotatable Bonds: 6

Acceptors: 4

Donors: 3

## Model Prediction

Prediction: Carcinogen

Probability: 0.444

Enrichment: 1.51

Bayesian Score: 4.21

Mahalanobis Distance: 20.3

Mahalanobis Distance p-value: 1.28e-019

Prediction: Positive if the Bayesian score is above the estimated best cutoff value from minimizing the false positive and false negative rate.

Probability: The estimated probability that the sample is in the positive category. This assumes that the Bayesian score follows a normal distribution and is different from the prediction using a cutoff.

Enrichment: An estimate of enrichment, that is, the increased likelihood (versus random) of this sample being in the category.

Bayesian Score: The standard Laplacian-modified Bayesian score.

Mahalanobis Distance: The Mahalanobis distance (MD) is the distance to the center of the training data. The larger the MD, the less trustworthy the prediction.

Mahalanobis Distance p-value: The p-value gives the fraction of training data with an MD greater than or equal to the one for the given sample, assuming normally distributed data. The smaller the p-value, the less trustworthy the prediction. For highly non-normal X properties (e.g., fingerprints), the MD p-value is wildly inaccurate.

# TOPKAT\_Mouse\_Male\_FDA\_None\_vs\_Carcinogen

## Structural Similar Compounds

| Name               | Glyburide                                                           | Glimepiride                                                         | Fluvastatin                                                         |
|--------------------|---------------------------------------------------------------------|---------------------------------------------------------------------|---------------------------------------------------------------------|
| Structure          |                                                                     |                                                                     |                                                                     |
| Actual Endpoint    | Non-Carcinogen                                                      | Carcinogen                                                          | Non-Carcinogen                                                      |
| Predicted Endpoint | Non-Carcinogen                                                      | Carcinogen                                                          | Non-Carcinogen                                                      |
| Distance           | 0.594                                                               | 0.599                                                               | 0.603                                                               |
| Reference          | US FDA (Centre for Drug Eval.& Res./Off. Testing & Res.) Sept. 1997 | US FDA (Centre for Drug Eval.& Res./Off. Testing & Res.) Sept. 1997 | US FDA (Centre for Drug Eval.& Res./Off. Testing & Res.) Sept. 1997 |

## Model Applicability

Unknown features are fingerprint features in the query molecule, but not found or appearing too infrequently in the training set.

1. All properties and OPS components are within expected ranges.

## Feature Contribution

### Top features for positive contribution

| Fingerprint | Bit/Smiles | Feature Structure   | Score | Carcinogen in training set |
|-------------|------------|---------------------|-------|----------------------------|
| FCFP_6      | 71953198   | <br>[*]C([*])([*])F | 0.612 | 12 out of 23               |



|                                        |             |                                                                                                                                                                                                           |        |                            |
|----------------------------------------|-------------|-----------------------------------------------------------------------------------------------------------------------------------------------------------------------------------------------------------|--------|----------------------------|
| FCFP_6                                 | -1838187238 | 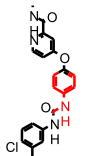<br><chem>[*]C(=[*])N([c]1:.[cH]:.[cH]:[*]:[cH]:[cH]:1</chem>                                                          | 0.565  | 4 out of 7                 |
| FCFP_6                                 | 859018953   | <br><chem>[*][c]1:.[cH]:[cH]:[cH]:[c]([c]1:.[cH]:[cH]:[cH]:1</chem><br><chem>(O[c](:.[cH]:[*]):[cH]:[cH]:[cH]:1</chem> | 0.46   | 1 out of 1                 |
| Top Features for negative contribution |             |                                                                                                                                                                                                           |        |                            |
| Fingerprint                            | Bit/Smiles  | Feature Structure                                                                                                                                                                                         | Score  | Carcinogen in training set |
| FCFP_6                                 | 2104062943  | <br><chem>[*][c]1:.[*]:[cH]:[c]([c]1:.[cH]:[cH]:1</chem><br><chem>C=[*]):[c](Cl):[cH]:1</chem>                         | -1.01  | 1 out of 17                |
| FCFP_6                                 | 551850122   | <br><chem>[*][c]1:.[*]:[cH]:[c]([c]1:.[cH]:[cH]:1</chem><br><chem>Cl):[cH]:[cH]:1</chem>                              | -0.433 | 8 out of 49                |
| FCFP_6                                 | 71476542    | <br><chem>[*]:[c](:.[*])Cl</chem>                                                                                    | -0.406 | 10 out of 59               |



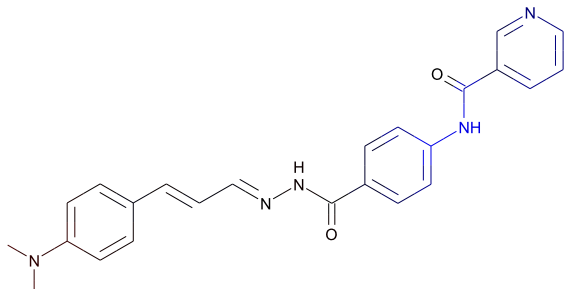

$C_{24}H_{23}N_5O_2$

Molecular Weight: 413.47172

ALogP: 2.839

Rotatable Bonds: 7

Acceptors: 5

Donors: 2

## Model Prediction

Prediction: Single-Carcinogen

Probability: 0.146

Enrichment: 0.486

Bayesian Score: -8.65

Mahalanobis Distance: 15.7

Mahalanobis Distance p-value: 6.91e-007

Prediction: Positive if the Bayesian score is above the estimated best cutoff value from minimizing the false positive and false negative rate.

Probability: The estimated probability that the sample is in the positive category. This assumes that the Bayesian score follows a normal distribution and is different from the prediction using a cutoff.

Enrichment: An estimate of enrichment, that is, the increased likelihood (versus random) of this sample being in the category. Bayesian Score: The standard Laplacian-modified Bayesian score.

Mahalanobis Distance: The Mahalanobis distance (MD) is the distance to the center of the training data. The larger the MD, the less trustworthy the prediction.

Mahalanobis Distance p-value: The p-value gives the fraction of training data with an MD greater than or equal to the one for the given sample, assuming normally distributed data. The smaller the p-value, the less trustworthy the prediction. For highly non-normal X properties (e.g., fingerprints), the MD p-value is wildly inaccurate.

## Structural Similar Compounds

| Name               | Bicalutamide                                                        | Lovastatin                                                          | Lansoprazole                                                        |
|--------------------|---------------------------------------------------------------------|---------------------------------------------------------------------|---------------------------------------------------------------------|
| Structure          |                                                                     |                                                                     |                                                                     |
| Actual Endpoint    | Single-Carcinogen                                                   | Multiple-Carcinogen                                                 | Single-Carcinogen                                                   |
| Predicted Endpoint | Single-Carcinogen                                                   | Multiple-Carcinogen                                                 | Single-Carcinogen                                                   |
| Distance           | 0.590                                                               | 0.709                                                               | 0.718                                                               |
| Reference          | US FDA (Centre for Drug Eval.& Res./Off. Testing & Res.) Sept. 1997 | US FDA (Centre for Drug Eval.& Res./Off. Testing & Res.) Sept. 1997 | US FDA (Centre for Drug Eval.& Res./Off. Testing & Res.) Sept. 1997 |

## Model Applicability

Unknown features are fingerprint features in the query molecule, but not found or appearing too infrequently in the training set.

1. OPS PC15 out of range. Value: -2.782. Training min, max, SD, explained variance: -2.4461, 3.3002, 1.005, 0.0188.
2. Unknown FCFP\_2 feature: -885520711: [\*]C(=[\*])NN=[\*]
3. Unknown FCFP\_2 feature: 581019816: [\*]N\N=C\[\*]
4. Unknown FCFP\_2 feature: -2100309237: [\*]\N=C\C=[\*]

## Feature Contribution

| Top features for positive contribution |            |                        |       |                                     |
|----------------------------------------|------------|------------------------|-------|-------------------------------------|
| Fingerprint                            | Bit/Smiles | Feature Structure      | Score | Multiple-Carcinogen in training set |
| FCFP_12                                | 675769755  | <br>[*]:[c](:[*])N(C)C | 0.573 | 5 out of 7                          |



|                                        |             |                                                                                                                                                 |        |                                     |
|----------------------------------------|-------------|-------------------------------------------------------------------------------------------------------------------------------------------------|--------|-------------------------------------|
| FCFP_12                                | 547884906   | 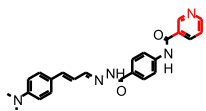<br><chem>[*][c]1:[*]:[cH]:[cH]:n:[cH]:1</chem>              | 0.4    | 1 out of 1                          |
| FCFP_12                                | -1033057683 | <br><chem>[*]=C[c]1:[cH]:[cH]:[c]([cH]:[cH]:1)N(C)C</chem>   | 0.395  | 2 out of 3                          |
| Top Features for negative contribution |             |                                                                                                                                                 |        |                                     |
| Fingerprint                            | Bit/Smiles  | Feature Structure                                                                                                                               | Score  | Multiple-Carcinogen in training set |
| FCFP_12                                | 1294255210  | <br><chem>[*]C(=[*])N[c]([*]):[*]</chem>                     | -1.63  | 0 out of 12                         |
| FCFP_12                                | 590925877   | <br><chem>[*]N[c]([cH]:[*]):[cH]:[*]</chem>                | -0.998 | 1 out of 13                         |
| FCFP_12                                | -1838187238 | <br><chem>[*]C(=[*])N[c]1:[cH]:[cH]:[*]:[cH]:[cH]:1</chem> | -0.859 | 0 out of 4                          |







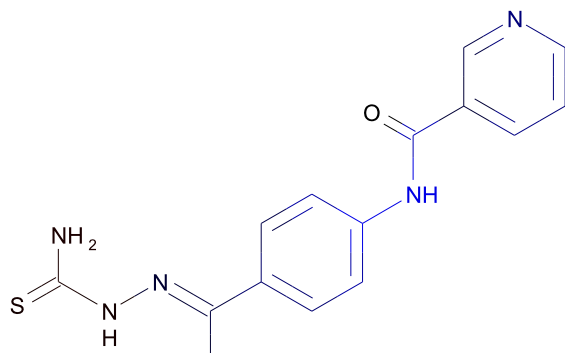C<sub>15</sub>H<sub>15</sub>N<sub>5</sub>OS

Molecular Weight: 313.3775

ALogP: 1.414

Rotatable Bonds: 5

Acceptors: 4

Donors: 3

## Model Prediction

Prediction: Single-Carcinogen

Probability: 0.146

Enrichment: 0.485

Bayesian Score: -8.89

Mahalanobis Distance: 17.3

Mahalanobis Distance p-value: 4.15e-008

Prediction: Positive if the Bayesian score is above the estimated best cutoff value from minimizing the false positive and false negative rate.

Probability: The estimated probability that the sample is in the positive category. This assumes that the Bayesian score follows a normal distribution and is different from the prediction using a cutoff.

Enrichment: An estimate of enrichment, that is, the increased likelihood (versus random) of this sample being in the category.

Bayesian Score: The standard Laplacian-modified Bayesian score.

Mahalanobis Distance: The Mahalanobis distance (MD) is the distance to the center of the training data. The larger the MD, the less trustworthy the prediction.

Mahalanobis Distance p-value: The p-value gives the fraction of training data with an MD greater than or equal to the one for the given sample, assuming normally distributed data. The smaller the p-value, the less trustworthy the prediction. For highly non-normal X properties (e.g., fingerprints), the MD p-value is wildly inaccurate.

## Structural Similar Compounds

| Name               | Sulfamethazine                                                      | Primidolol                                                          | Procarbazine                                                        |
|--------------------|---------------------------------------------------------------------|---------------------------------------------------------------------|---------------------------------------------------------------------|
| Structure          |                                                                     |                                                                     |                                                                     |
| Actual Endpoint    | Single-Carcinogen                                                   | Single-Carcinogen                                                   | Multiple-Carcinogen                                                 |
| Predicted Endpoint | Single-Carcinogen                                                   | Single-Carcinogen                                                   | Multiple-Carcinogen                                                 |
| Distance           | 0.698                                                               | 0.745                                                               | 0.746                                                               |
| Reference          | US FDA (Centre for Drug Eval.& Res./Off. Testing & Res.) Sept. 1997 | US FDA (Centre for Drug Eval.& Res./Off. Testing & Res.) Sept. 1997 | US FDA (Centre for Drug Eval.& Res./Off. Testing & Res.) Sept. 1997 |

## Model Applicability

Unknown features are fingerprint features in the query molecule, but not found or appearing too infrequently in the training set.

1. All properties and OPS components are within expected ranges.
2. Unknown FCFP\_2 feature: 581019816: [\*]N\N=C\[\*]
3. Unknown FCFP\_2 feature: -885520711: [\*]C(=[\*])NN=[\*]

## Feature Contribution

### Top features for positive contribution

| Fingerprint | Bit/Smiles | Feature Structure                  | Score | Multiple-Carcinogen in training set |
|-------------|------------|------------------------------------|-------|-------------------------------------|
| FCFP_12     | 547884906  | <br>[*][c]1:[*]:[cH]:[cH]:n:[cH]:1 | 0.4   | 1 out of 1                          |



|                                        |             |                                                                                                                                            |        |                                     |
|----------------------------------------|-------------|--------------------------------------------------------------------------------------------------------------------------------------------|--------|-------------------------------------|
| FCFP_12                                | 1499521844  | 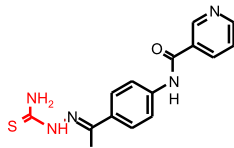<br><chem>[*]NC(=S)N</chem>                             | 0.39   | 5 out of 9                          |
| FCFP_12                                | -1549103449 | <br><chem>[*]NC(=O)[c](:[*]):[*]</chem>                 | 0.168  | 3 out of 7                          |
| Top Features for negative contribution |             |                                                                                                                                            |        |                                     |
| Fingerprint                            | Bit/Smiles  | Feature Structure                                                                                                                          | Score  | Multiple-Carcinogen in training set |
| FCFP_12                                | 1294255210  | <br><chem>[*]C(=[*])N[c](:[*]):[*]</chem>               | -1.63  | 0 out of 12                         |
| FCFP_12                                | 590925877   | <br><chem>[*]N[c](:[cH]:[*]):[cH]:[*]</chem>          | -0.998 | 1 out of 13                         |
| FCFP_12                                | -1838187238 | <br><chem>[*]C(=[*])N[c]1:[cH]:[cH]:[*]:[cH]:1</chem> | -0.859 | 0 out of 4                          |







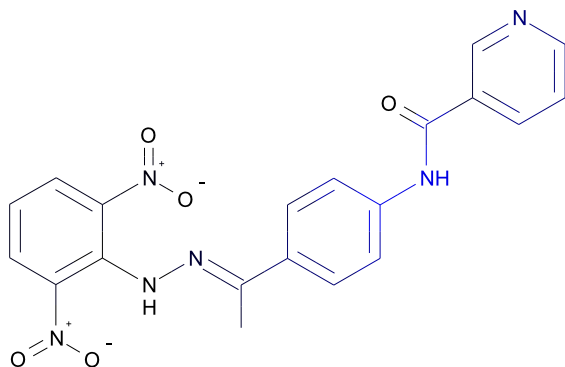
 $C_{20}H_{16}N_6O_5$ 

Molecular Weight: 420.37824

ALogP: 2.852

Rotatable Bonds: 7

Acceptors: 8

Donors: 2

## Model Prediction

Prediction: Single-Carcinogen

Probability: 0.148

Enrichment: 0.492

Bayesian Score: -11

Mahalanobis Distance: 14

Mahalanobis Distance p-value: 1.71e-005

Prediction: Positive if the Bayesian score is above the estimated best cutoff value from minimizing the false positive and false negative rate.

Probability: The estimated probability that the sample is in the positive category. This assumes that the Bayesian score follows a normal distribution and is different from the prediction using a cutoff.

Enrichment: An estimate of enrichment, that is, the increased likelihood (versus random) of this sample being in the category. Bayesian Score: The standard Laplacian-modified Bayesian score.

Mahalanobis Distance: The Mahalanobis distance (MD) is the distance to the center of the training data. The larger the MD, the less trustworthy the prediction.

Mahalanobis Distance p-value: The p-value gives the fraction of training data with an MD greater than or equal to the one for the given sample, assuming normally distributed data. The smaller the p-value, the less trustworthy the prediction. For highly non-normal X properties (e.g., fingerprints), the MD p-value is wildly inaccurate.

## Structural Similar Compounds

| Name               | Sulfasalazine                                                       | Dihydroxymethylfurazirine                                           | Bicalutamide                                                        |
|--------------------|---------------------------------------------------------------------|---------------------------------------------------------------------|---------------------------------------------------------------------|
| Structure          |                                                                     |                                                                     |                                                                     |
| Actual Endpoint    | Single-Carcinogen                                                   | Multiple-Carcinogen                                                 | Single-Carcinogen                                                   |
| Predicted Endpoint | Single-Carcinogen                                                   | Multiple-Carcinogen                                                 | Single-Carcinogen                                                   |
| Distance           | 0.663                                                               | 0.774                                                               | 0.787                                                               |
| Reference          | US FDA (Centre for Drug Eval.& Res./Off. Testing & Res.) Sept. 1997 | US FDA (Centre for Drug Eval.& Res./Off. Testing & Res.) Sept. 1997 | US FDA (Centre for Drug Eval.& Res./Off. Testing & Res.) Sept. 1997 |

## Model Applicability

Unknown features are fingerprint features in the query molecule, but not found or appearing too infrequently in the training set.

1. All properties and OPS components are within expected ranges.
2. Unknown FCFP\_2 feature: 5: [\*][O-]
3. Unknown FCFP\_2 feature: 581019816: [\*]N\N=C\[\*]
4. Unknown FCFP\_2 feature: 1294285001: [\*]=NN[c](:[\*]):[\*]
5. Unknown FCFP\_2 feature: -828984032: [\*][c](:[\*]):[c]([N+](=[\*])[\*]):c:[\*]
6. Unknown FCFP\_2 feature: -1338588315: [\*]:[c](:[\*])[N+](=O)[O-]
7. Unknown FCFP\_2 feature: 1872392852: [\*][N+](=O)[\*]
8. Unknown FCFP\_2 feature: 260476081: [\*][N+](=[\*])[O-]

## Feature Contribution

| Top features for positive contribution |            |                   |       |                                     |
|----------------------------------------|------------|-------------------|-------|-------------------------------------|
| Fingerprint                            | Bit/Smiles | Feature Structure | Score | Multiple-Carcinogen in training set |
|                                        |            |                   |       |                                     |



|                                        |             |                                                                                                                                    |        |                                     |
|----------------------------------------|-------------|------------------------------------------------------------------------------------------------------------------------------------|--------|-------------------------------------|
| FCFP_12                                | 547884906   | 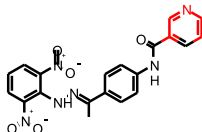<br><chem>[*][c]1:[*]:[cH]:[cH]:n:[cH]:1</chem> | 0.4    | 1 out of 1                          |
| FCFP_12                                | -1549103449 | <br><chem>[*]NC(=O)[c](:[*]):[*]</chem>         | 0.168  | 3 out of 7                          |
| FCFP_12                                | 136597326   | <br><chem>[*]C(=[*])C</chem>                    | 0.0722 | 18 out of 49                        |
| Top Features for negative contribution |             |                                                                                                                                    |        |                                     |
| Fingerprint                            | Bit/Smiles  | Feature Structure                                                                                                                  | Score  | Multiple-Carcinogen in training set |
| FCFP_12                                | 1294255210  | <br><chem>[*]C(=[*])N[c](:[*]):[*]</chem>     | -1.63  | 0 out of 12                         |
| FCFP_12                                | 590925877   | <br><chem>[*]N[c](:[cH]:[*]):[cH]:[*]</chem>  | -0.998 | 1 out of 13                         |



|         |             |                                                                                                                                               |        |            |
|---------|-------------|-----------------------------------------------------------------------------------------------------------------------------------------------|--------|------------|
| FCFP_12 | -1838187238 | 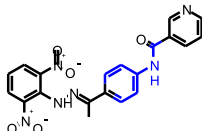<br><chem>[*]C(=[*])N[c]1:[cH]:[cH]:[*]:[cH]:[cH]:1</chem> | -0.859 | 0 out of 4 |
|---------|-------------|-----------------------------------------------------------------------------------------------------------------------------------------------|--------|------------|



# Sorafenib

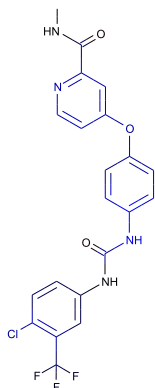

$C_{21}H_{16}ClF_3N_4O_3$

Molecular Weight: 464.82494

ALogP: 4.175

Rotatable Bonds: 6

Acceptors: 4

Donors: 3

## Model Prediction

Prediction: Single-Carcinogen

Probability: 0.139

Enrichment: 0.461

Bayesian Score: -14.7

Mahalanobis Distance: 21.3

Mahalanobis Distance p-value: 4.93e-011

Prediction: Positive if the Bayesian score is above the estimated best cutoff value from minimizing the false positive and false negative rate.

Probability: The estimated probability that the sample is in the positive category. This assumes that the Bayesian score follows a normal distribution and is different from the prediction using a cutoff.

Enrichment: An estimate of enrichment, that is, the increased likelihood (versus random) of this sample being in the category.

Bayesian Score: The standard Laplacian-modified Bayesian score.

Mahalanobis Distance: The Mahalanobis distance (MD) is the distance to the center of the training data. The larger the MD, the less trustworthy the prediction.

Mahalanobis Distance p-value: The p-value gives the fraction of training data with an MD greater than or equal to the one for the given sample, assuming normally distributed data. The smaller the p-value, the less trustworthy the prediction. For highly non-normal X properties (e.g., fingerprints), the MD p-value is wildly inaccurate.

# TOPKAT\_Mouse\_Male\_FDA\_Single\_vs\_Multiple

## Structural Similar Compounds

| Name               | Glimepiride                                                         | Bicalutamide                                                        | Lansoprazole                                                        |
|--------------------|---------------------------------------------------------------------|---------------------------------------------------------------------|---------------------------------------------------------------------|
| Structure          |                                                                     |                                                                     |                                                                     |
| Actual Endpoint    | Single-Carcinogen                                                   | Single-Carcinogen                                                   | Single-Carcinogen                                                   |
| Predicted Endpoint | Single-Carcinogen                                                   | Single-Carcinogen                                                   | Single-Carcinogen                                                   |
| Distance           | 0.626                                                               | 0.700                                                               | 0.866                                                               |
| Reference          | US FDA (Centre for Drug Eval.& Res./Off. Testing & Res.) Sept. 1997 | US FDA (Centre for Drug Eval.& Res./Off. Testing & Res.) Sept. 1997 | US FDA (Centre for Drug Eval.& Res./Off. Testing & Res.) Sept. 1997 |

## Model Applicability

Unknown features are fingerprint features in the query molecule, but not found or appearing too infrequently in the training set.

1. All properties and OPS components are within expected ranges.

## Feature Contribution

### Top features for positive contribution

| Fingerprint | Bit/Smiles | Feature Structure | Score | Multiple-Carcinogen in training set |
|-------------|------------|-------------------|-------|-------------------------------------|
| FCFP_12     | 1499521844 | <br>[*]NC(=S)N    | 0.39  | 5 out of 9                          |



|                                        |             |                                                                                                                                               |        |                                     |
|----------------------------------------|-------------|-----------------------------------------------------------------------------------------------------------------------------------------------|--------|-------------------------------------|
| FCFP_12                                | -904785030  | 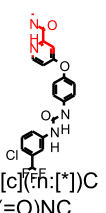<br><chem>[*]:[cH]:[c](F)(F)[*])C(=O)NC</chem>             | 0.174  | 1 out of 2                          |
| FCFP_12                                | -1549103449 | <br><chem>[*]NC(=O)[c]([*]):[*]</chem>                     | 0.168  | 3 out of 7                          |
| Top Features for negative contribution |             |                                                                                                                                               |        |                                     |
| Fingerprint                            | Bit/Smiles  | Feature Structure                                                                                                                             | Score  | Multiple-Carcinogen in training set |
| FCFP_12                                | 1294255210  | <br><chem>[*]C(=[*])N([c]([*]):[*]):[*]</chem>             | -1.63  | 0 out of 12                         |
| FCFP_12                                | 590925877   | <br><chem>[*]N([c]([c]([*]):[*]):[c]H):[*]</chem>        | -0.998 | 1 out of 13                         |
| FCFP_12                                | -1462709112 | <br><chem>[*]C(=[*])[c]([c]H):[*]:[c]H]:[c]H]:n:1</chem> | -0.994 | 0 out of 5                          |







7a

## TOPKAT\_Ocular\_Irritancy\_Mild\_vs\_Moderate\_Severe

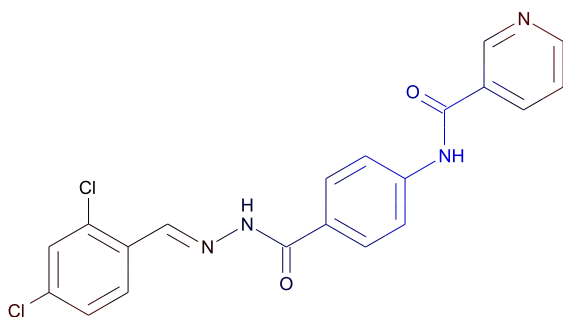C<sub>20</sub>H<sub>14</sub>Cl<sub>2</sub>N<sub>4</sub>O<sub>2</sub>

Molecular Weight: 413.25676

ALogP: 3.646

Rotatable Bonds: 5

Acceptors: 4

Donors: 2

**Model Prediction**

Prediction: Mild

Probability: 0.69

Enrichment: 1

Bayesian Score: -3.69

Mahalanobis Distance: 6.1

Mahalanobis Distance p-value: 1

Prediction: Positive if the Bayesian score is above the estimated best cutoff value from minimizing the false positive and false negative rate.

Probability: The estimated probability that the sample is in the positive category. This assumes that the Bayesian score follows a normal distribution and is different from the prediction using a cutoff.

Enrichment: An estimate of enrichment, that is, the increased likelihood (versus random) of this sample being in the category.

Bayesian Score: The standard Laplacian-modified Bayesian score.

Mahalanobis Distance: The Mahalanobis distance (MD) is the distance to the center of the training data. The larger the MD, the less trustworthy the prediction.

Mahalanobis Distance p-value: The p-value gives the fraction of training data with an MD greater than or equal to the one for the given sample, assuming normally distributed data. The smaller the p-value, the less trustworthy the prediction. For highly non-normal X properties (e.g., fingerprints), the MD p-value is wildly inaccurate.

**Structural Similar Compounds**

| Name               | 1-AMINO-4-BENZOYLAMINO-ANTHRAQUINONE | 5-NORBORNENE-2;3-DICARBOXYLIC ACID; 1;4;5;6;7;7-HEXACHLORO- | 1-BENZOYLAMINO-4-METHOXY-5-CHLORANTHRAQUINONE |
|--------------------|--------------------------------------|-------------------------------------------------------------|-----------------------------------------------|
| Structure          |                                      |                                                             |                                               |
| Actual Endpoint    | Mild                                 | Moderate_Severe                                             | Mild                                          |
| Predicted Endpoint | Mild                                 | Moderate_Severe                                             | Mild                                          |
| Distance           | 0.629                                | 0.641                                                       | 0.674                                         |
| Reference          | 28ZPAK-;124;72                       | 28ZPAK-;92;72                                               | 28ZPAK-;90;72                                 |

**Model Applicability**

Unknown features are fingerprint features in the query molecule, but not found or appearing too infrequently in the training set.

1. All properties and OPS components are within expected ranges.
2. Unknown FCFP\_2 feature: 581019816: [\*]N\N=C\[\*]

**Feature Contribution**

| Top features for positive contribution |            |                                                  |       |                                 |
|----------------------------------------|------------|--------------------------------------------------|-------|---------------------------------|
| Fingerprint                            | Bit/Smiles | Feature Structure                                | Score | Moderate_Severe in training set |
| FCFP_10                                | -149636017 | <p>[*][c]1:[cH]:[c](Cl):[cH]:[cH]:[c]:1C=[*]</p> | 0.352 | 7 out of 7                      |



|                                        |             |                                                                                                                                                  |       |                                 |
|----------------------------------------|-------------|--------------------------------------------------------------------------------------------------------------------------------------------------|-------|---------------------------------|
| FCFP_10                                | 547884906   | 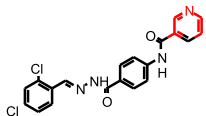<br><chem>[*][c]1:[*]:[cH]:[cH]:n:[cH]:1</chem>               | 0.317 | 4 out of 4                      |
| FCFP_10                                | 73264552    | <br><chem>[*][c]1:[cH]:[cH]:[c](Cl):[cH]:[c]:1Cl</chem>       | 0.317 | 4 out of 4                      |
| Top Features for negative contribution |             |                                                                                                                                                  |       |                                 |
| Fingerprint                            | Bit/Smiles  | Feature Structure                                                                                                                                | Score | Moderate_Severe in training set |
| FCFP_10                                | -1925475824 | <br><chem>[*]:[cH]:[c](:[cH]:[*])C(=O)N[c](:[*]):[*]</chem>   | -1.29 | 0 out of 4                      |
| FCFP_10                                | -581879738  | <br><chem>[*]NC(=O)[c]1:[cH]:[cH]:[*]:[cH]:[cH]:1</chem>    | -1.29 | 0 out of 4                      |
| FCFP_10                                | 1175232969  | <br><chem>[*]:[cH]:[c](NC(=O)[c](:[*]):[*]):[cH]:[*]</chem> | -1.29 | 0 out of 4                      |



7b

## TOPKAT\_Ocular\_Irritancy\_Mild\_vs\_Moderate\_Severe

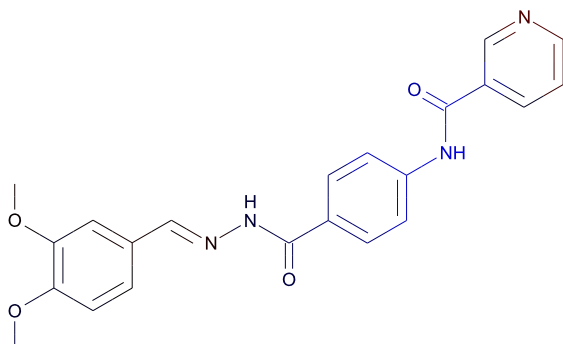C<sub>22</sub>H<sub>20</sub>N<sub>4</sub>O<sub>4</sub>

Molecular Weight: 404.4186

ALogP: 2.284

Rotatable Bonds: 7

Acceptors: 6

Donors: 2

**Model Prediction**

Prediction: Mild

Probability: 0.604

Enrichment: 0.876

Bayesian Score: -4.96

Mahalanobis Distance: 6.31

Mahalanobis Distance p-value: 1

Prediction: Positive if the Bayesian score is above the estimated best cutoff value from minimizing the false positive and false negative rate.

Probability: The estimated probability that the sample is in the positive category. This assumes that the Bayesian score follows a normal distribution and is different from the prediction using a cutoff.

Enrichment: An estimate of enrichment, that is, the increased likelihood (versus random) of this sample being in the category.

Bayesian Score: The standard Laplacian-modified Bayesian score.

Mahalanobis Distance: The Mahalanobis distance (MD) is the distance to the center of the training data. The larger the MD, the less trustworthy the prediction.

Mahalanobis Distance p-value: The p-value gives the fraction of training data with an MD greater than or equal to the one for the given sample, assuming normally distributed data. The smaller the p-value, the less trustworthy the prediction. For highly non-normal X properties (e.g., fingerprints), the MD p-value is wildly inaccurate.

**Structural Similar Compounds**

| Name               | 1-AMINO-4-BENZOYLAMINO-ANTHRAQUINONE | ANTHRAQUINONE; 1-AMINO-4-HYDROXY-2-PHENOXY- | COLCHICINE       |
|--------------------|--------------------------------------|---------------------------------------------|------------------|
| Structure          |                                      |                                             |                  |
| Actual Endpoint    | Mild                                 | Mild                                        | Moderate_Severe  |
| Predicted Endpoint | Mild                                 | Mild                                        | Moderate_Severe  |
| Distance           | 0.708                                | 0.709                                       | 0.711            |
| Reference          | 28ZPAK-;124;72                       | 28ZPAK 239;72                               | AJOPAA 31;837;48 |

**Model Applicability**

Unknown features are fingerprint features in the query molecule, but not found or appearing too infrequently in the training set.

1. All properties and OPS components are within expected ranges.
2. Unknown FCFP\_2 feature: 581019816: [\*]N\N=C\[\*]

**Feature Contribution****Top features for positive contribution**

| Fingerprint | Bit/Smiles | Feature Structure                  | Score | Moderate_Severe in training set |
|-------------|------------|------------------------------------|-------|---------------------------------|
| FCFP_10     | 547884906  | <br>[*][c]1:[*]:[cH]:[cH]:n:[cH]:1 | 0.317 | 4 out of 4                      |



|                                        |             |                                                                                                                                              |       |                                    |
|----------------------------------------|-------------|----------------------------------------------------------------------------------------------------------------------------------------------|-------|------------------------------------|
| FCFP_10                                | -1695756380 | 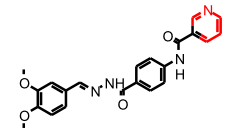<br>[*]1:[cH]:[cH]:[cH]:n<br>:[cH]:1                      | 0.285 | 10 out of 11                       |
| FCFP_10                                | -124655670  | <br>[*]:[cH]:[cH]:n:[*]                                   | 0.259 | 14 out of 16                       |
| Top Features for negative contribution |             |                                                                                                                                              |       |                                    |
| Fingerprint                            | Bit/Smiles  | Feature Structure                                                                                                                            | Score | Moderate_Severe<br>in training set |
| FCFP_10                                | -581879738  | <br>[*]NC(=O)[c]1:[cH]:[cH]:[cH]:[cH]:[cH]:1              | -1.29 | 0 out of 4                         |
| FCFP_10                                | -1925475824 | <br>[*]:[cH]:[c](:[cH]):[*]<br>]C(=O)N[c](:[*]):[*]<br>] | -1.29 | 0 out of 4                         |
| FCFP_10                                | 1175232969  | <br>[*]:[cH]:[c](NC(=O)[c](:[*]):[*]):[cH]:[*]<br>]     | -1.29 | 0 out of 4                         |



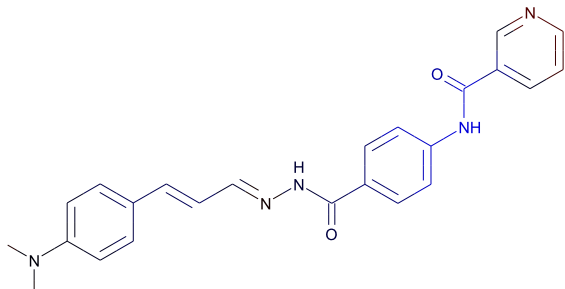

$C_{24}H_{23}N_5O_2$

Molecular Weight: 413.47172

ALogP: 2.839

Rotatable Bonds: 7

Acceptors: 5

Donors: 2

## Model Prediction

Prediction: Mild

Probability: 0.546

Enrichment: 0.793

Bayesian Score: -5.66

Mahalanobis Distance: 9.87

Mahalanobis Distance p-value: 0.127

Prediction: Positive if the Bayesian score is above the estimated best cutoff value from minimizing the false positive and false negative rate.

Probability: The estimated probability that the sample is in the positive category. This assumes that the Bayesian score follows a normal distribution and is different from the prediction using a cutoff.

Enrichment: An estimate of enrichment, that is, the increased likelihood (versus random) of this sample being in the category.

Bayesian Score: The standard Laplacian-modified Bayesian score.

Mahalanobis Distance: The Mahalanobis distance (MD) is the distance to the center of the training data. The larger the MD, the less trustworthy the prediction.

Mahalanobis Distance p-value: The p-value gives the fraction of training data with an MD greater than or equal to the one for the given sample, assuming normally distributed data. The smaller the p-value, the less trustworthy the prediction. For highly non-normal X properties (e.g., fingerprints), the MD p-value is wildly inaccurate.

## Structural Similar Compounds

| Name               | 1-AMINO-4-BENZOYLAMINO-ANTHRAQUINONE | 5-NORBORNENE-2;3-DICARBOXYLIC ACID; 1;4;5;6;7;7-HEXACHLORO- | ANTHRAQUINONE; 1-AMINO-4-HYDROXY-2-PHENOXY- |
|--------------------|--------------------------------------|-------------------------------------------------------------|---------------------------------------------|
| Structure          |                                      |                                                             |                                             |
| Actual Endpoint    | Mild                                 | Moderate_Severe                                             | Mild                                        |
| Predicted Endpoint | Mild                                 | Moderate_Severe                                             | Mild                                        |
| Distance           | 0.680                                | 0.683                                                       | 0.708                                       |
| Reference          | 28ZPAK-;124;72                       | 28ZPAK-;92;72                                               | 28ZPAK 239;72                               |

## Model Applicability

Unknown features are fingerprint features in the query molecule, but not found or appearing too infrequently in the training set.

1. All properties and OPS components are within expected ranges.
2. Unknown FCFP\_2 feature: 581019816: [\*]N\N=C\[\*]

## Feature Contribution

| Top features for positive contribution |            |                                            |       |                                 |
|----------------------------------------|------------|--------------------------------------------|-------|---------------------------------|
| Fingerprint                            | Bit/Smiles | Feature Structure                          | Score | Moderate_Severe in training set |
| FCFP_10                                | 547884906  | <p>[*][c]1:[*]:[cH]:[cH]<br/>:n:[cH]:1</p> | 0.317 | 4 out of 4                      |



| FCFP_10                                | -1695756380 | 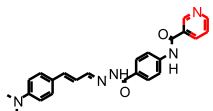<br>[*]1:[cH]:[cH]:[cH]:n<br>:[cH]:1                              | 0.285 | 10 out of 11                       |
|----------------------------------------|-------------|------------------------------------------------------------------------------------------------------------------------------------------------------|-------|------------------------------------|
| FCFP_10                                | -124655670  | <br>[*]:[cH]:[cH]:n:[*]                                           | 0.259 | 14 out of 16                       |
| Top Features for negative contribution |             |                                                                                                                                                      |       |                                    |
| Fingerprint                            | Bit/Smiles  | Feature Structure                                                                                                                                    | Score | Moderate_Severe<br>in training set |
| FCFP_10                                | -581879738  | <br>[*]NC(=O)[c]1:[cH]:[cH]:[cH]:[cH]:[cH]:1                      | -1.29 | 0 out of 4                         |
| FCFP_10                                | 1175232969  | <br>[*]:[cH]:[c](NC(=O)[c]1:[cH]:[cH]:[cH]:[cH]:1):[*]          | -1.29 | 0 out of 4                         |
| FCFP_10                                | -1925475824 | <br>[*]:[cH]:[c]:[cH]:[*]<br>])C(=O)N[c]1:[cH]:[cH]:[cH]:[cH]:1 | -1.29 | 0 out of 4                         |



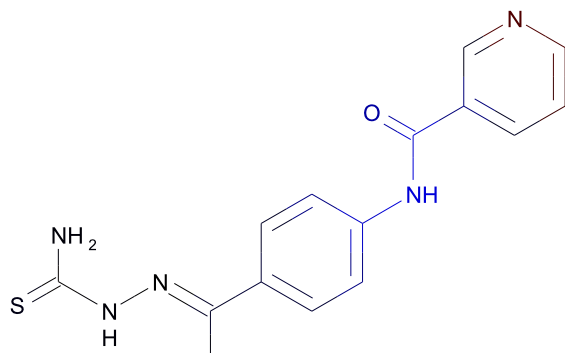

$C_{15}H_{15}N_5OS$

Molecular Weight: 313.3775

ALogP: 1.414

Rotatable Bonds: 5

Acceptors: 4

Donors: 3

## Model Prediction

Prediction: Mild

Probability: 0.702

Enrichment: 1.02

Bayesian Score: -3.49

Mahalanobis Distance: 6.48

Mahalanobis Distance p-value: 1

Prediction: Positive if the Bayesian score is above the estimated best cutoff value from minimizing the false positive and false negative rate.

Probability: The estimated probability that the sample is in the positive category. This assumes that the Bayesian score follows a normal distribution and is different from the prediction using a cutoff.

Enrichment: An estimate of enrichment, that is, the increased likelihood (versus random) of this sample being in the category.

Bayesian Score: The standard Laplacian-modified Bayesian score.

Mahalanobis Distance: The Mahalanobis distance (MD) is the distance to the center of the training data. The larger the MD, the less trustworthy the prediction.

Mahalanobis Distance p-value: The p-value gives the fraction of training data with an MD greater than or equal to the one for the given sample, assuming normally distributed data. The smaller the p-value, the less trustworthy the prediction. For highly non-normal X properties (e.g., fingerprints), the MD p-value is wildly inaccurate.

## Structural Similar Compounds

| Name               | 2-NAPHTHALENESULFONIC ACID; 4-HYDROXY-7-(METHYLAMINO)- | ANTHRAQUINONE; 1-((2-HYDROXYETHYL)AMINO)-4-(METHYLAMINO)- | O-TOLUENESULFONAMIDE; 4-AMINO-N-(2-HYDROXYETHYL)- |
|--------------------|--------------------------------------------------------|-----------------------------------------------------------|---------------------------------------------------|
| Structure          |                                                        |                                                           |                                                   |
| Actual Endpoint    | Mild                                                   | Mild                                                      | Moderate_Severe                                   |
| Predicted Endpoint | Mild                                                   | Mild                                                      | Moderate_Severe                                   |
| Distance           | 0.606                                                  | 0.637                                                     | 0.656                                             |
| Reference          | 28ZPAK 190;72                                          | 28ZPAK 245;72                                             | 28ZPAK-;200;72                                    |

## Model Applicability

Unknown features are fingerprint features in the query molecule, but not found or appearing too infrequently in the training set.

- All properties and OPS components are within expected ranges.
- Unknown FCFP\_2 feature: 581019816: [\*]N\N=C\[\*]

## Feature Contribution

| Top features for positive contribution |            |                                                 |       |                                 |
|----------------------------------------|------------|-------------------------------------------------|-------|---------------------------------|
| Fingerprint                            | Bit/Smiles | Feature Structure                               | Score | Moderate_Severe in training set |
| FCFP_10                                | 547884906  | <br><chem>[*][c]1:[*]:[cH]:[cH]:n:[cH]:1</chem> | 0.317 | 4 out of 4                      |



|                                        |             |                                                                                                                                                        |        |                                    |
|----------------------------------------|-------------|--------------------------------------------------------------------------------------------------------------------------------------------------------|--------|------------------------------------|
| FCFP_10                                | -1695756380 | 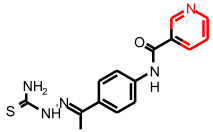<br>[*]1:[cH]:[cH]:[cH]:n<br>:[cH]:1                                | 0.285  | 10 out of 11                       |
| FCFP_10                                | -124655670  | <br>[*]:[cH]:[cH]:n:[*]                                             | 0.259  | 14 out of 16                       |
| Top Features for negative contribution |             |                                                                                                                                                        |        |                                    |
| Fingerprint                            | Bit/Smiles  | Feature Structure                                                                                                                                      | Score  | Moderate_Severe<br>in training set |
| FCFP_10                                | 1175232969  | <br>[*]:[cH]:[c](NC(=O)[c<br>]([*]):[*]):[cH]:[*]<br>]              | -1.29  | 0 out of 4                         |
| FCFP_10                                | -1925475824 | <br>[*]:[cH]:[c](:[cH]:[*<br>])C(=O)N[c](:[*]):[*]<br>]            | -1.29  | 0 out of 4                         |
| FCFP_10                                | -790336137  | <br>[*]C(=[*])N[c]1:[cH]:<br>[cH]:[c](:[cH]:[cH]:<br>1)C(=[*])[*] | -0.507 | 0 out of 1                         |



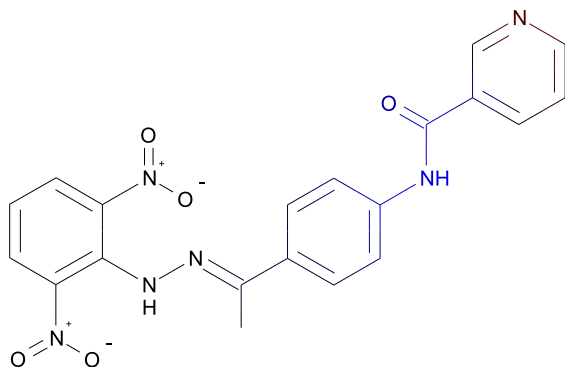

$C_{20}H_{16}N_6O_5$

Molecular Weight: 420.37824

ALogP: 2.852

Rotatable Bonds: 7

Acceptors: 8

Donors: 2

## Model Prediction

Prediction: Mild

Probability: 0.692

Enrichment: 1

Bayesian Score: -3.66

Mahalanobis Distance: 5.51

Mahalanobis Distance p-value: 1

Prediction: Positive if the Bayesian score is above the estimated best cutoff value from minimizing the false positive and false negative rate.

Probability: The estimated probability that the sample is in the positive category. This assumes that the Bayesian score follows a normal distribution and is different from the prediction using a cutoff.

Enrichment: An estimate of enrichment, that is, the increased likelihood (versus random) of this sample being in the category.

Bayesian Score: The standard Laplacian-modified Bayesian score.

Mahalanobis Distance: The Mahalanobis distance (MD) is the distance to the center of the training data. The larger the MD, the less trustworthy the prediction.

Mahalanobis Distance p-value: The p-value gives the fraction of training data with an MD greater than or equal to the one for the given sample, assuming normally distributed data. The smaller the p-value, the less trustworthy the prediction. For highly non-normal X properties (e.g., fingerprints), the MD p-value is wildly inaccurate.

## Structural Similar Compounds

| Name               | 4,4'-DIAMINO-1,1'-DIANTHRIMIDE | 2,2'-Stilbenedisulfonic acid; 4,4'-dinitro-                             | COLCHICINE       |
|--------------------|--------------------------------|-------------------------------------------------------------------------|------------------|
| Structure          |                                |                                                                         |                  |
| Actual Endpoint    | Mild                           | Mild                                                                    | Moderate_Severe  |
| Predicted Endpoint | Mild                           | Mild                                                                    | Moderate_Severe  |
| Distance           | 0.774                          | 0.797                                                                   | 0.826            |
| Reference          | 28ZPAK-;125;72                 | Prehled Prumyslove Toxikologie; Organické Latky; Marhold; J. pp 1062;86 | AJOPAA 31;837;48 |

## Model Applicability

Unknown features are fingerprint features in the query molecule, but not found or appearing too infrequently in the training set.

1. All properties and OPS components are within expected ranges.
2. Unknown FCFP\_2 feature: 581019816: [\*]N\N=C\[\*]
3. Unknown FCFP\_2 feature: 1294285001: [\*]=NN[c](:[\*]):[\*]
4. Unknown FCFP\_2 feature: -828984032: [\*][c](:[\*]):[c]([N+](=[\*])[\*]):c:[\*]
5. Unknown FCFP\_2 feature: -1338588315: [\*]:[c](:[\*])[N+](=O)[O-]
6. Unknown FCFP\_2 feature: 1872392852: [\*][N+](=O)[\*]
7. Unknown FCFP\_2 feature: 260476081: [\*][N+](=[\*])[O-]

## Feature Contribution

### Top features for positive contribution

| Fingerprint | Bit/Smiles | Feature Structure | Score | Moderate_Severe in training set |
|-------------|------------|-------------------|-------|---------------------------------|
|-------------|------------|-------------------|-------|---------------------------------|



|                                        |             |                                                                                                                                                |       |                                    |
|----------------------------------------|-------------|------------------------------------------------------------------------------------------------------------------------------------------------|-------|------------------------------------|
| FCFP_10                                | 547884906   | 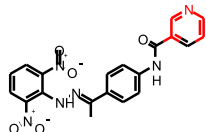<br>[*][c]1:[*]:[cH]:[cH]<br>:n:[cH]:1                      | 0.317 | 4 out of 4                         |
| FCFP_10                                | -1695756380 | <br>[*]1:[cH]:[cH]:[cH]:n<br>:[cH]:1                        | 0.285 | 10 out of 11                       |
| FCFP_10                                | -124655670  | <br>[*]:[cH]:[cH]:n:[*]                                     | 0.259 | 14 out of 16                       |
| Top Features for negative contribution |             |                                                                                                                                                |       |                                    |
| Fingerprint                            | Bit/Smiles  | Feature Structure                                                                                                                              | Score | Moderate_Severe<br>in training set |
| FCFP_10                                | 1175232969  | <br>[*]:[cH]:[c](NC(=O)[c]<br>:[*]):[cH]:[*]<br>]          | -1.29 | 0 out of 4                         |
| FCFP_10                                | -1925475824 | <br>[*]:[cH]:[c](:[cH]):[*]<br>])C(=O)N[c](:[*]):[*]<br>] | -1.29 | 0 out of 4                         |
|                                        |             |                                                                                                                                                |       |                                    |



|         |            |                                                                                                                                                                                                                         |        |            |
|---------|------------|-------------------------------------------------------------------------------------------------------------------------------------------------------------------------------------------------------------------------|--------|------------|
| FCFP_10 | -790336137 | 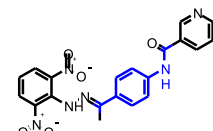 <chem>[O-]S(=O)(=O)Nc1ccccc1N=Nc2ccc(Nc3ccncc3)cc2</chem> <p> [*]C(=[*])N[c]1:[cH]:<br/> [cH]:[c]:[cH]:[cH]:<br/> 1)C(=[*])[*] </p> | -0.507 | 0 out of 1 |
|---------|------------|-------------------------------------------------------------------------------------------------------------------------------------------------------------------------------------------------------------------------|--------|------------|



# Sorafenib

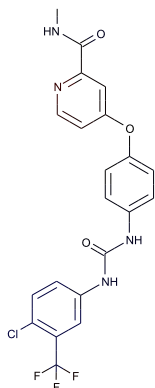

$C_{21}H_{16}ClF_3N_4O_3$

Molecular Weight: 464.82494

ALogP: 4.175

Rotatable Bonds: 6

Acceptors: 4

Donors: 3

## Model Prediction

Prediction: Mild

Probability: 0.776

Enrichment: 1.13

Bayesian Score: -1.8

Mahalanobis Distance: 8.95

Mahalanobis Distance p-value: 0.537

Prediction: Positive if the Bayesian score is above the estimated best cutoff value from minimizing the false positive and false negative rate.

Probability: The estimated probability that the sample is in the positive category. This assumes that the Bayesian score follows a normal distribution and is different from the prediction using a cutoff.

Enrichment: An estimate of enrichment, that is, the increased likelihood (versus random) of this sample being in the category.

Bayesian Score: The standard Laplacian-modified Bayesian score.

Mahalanobis Distance: The Mahalanobis distance (MD) is the distance to the center of the training data. The larger the MD, the less trustworthy the prediction.

Mahalanobis Distance p-value: The p-value gives the fraction of training data with an MD greater than or equal to the one for the given sample, assuming normally distributed data. The smaller the p-value, the less trustworthy the prediction. For highly non-normal X properties (e.g., fingerprints), the MD p-value is wildly inaccurate.

# TOPKAT\_Ocular\_Irritancy\_Mild\_vs\_Moderate\_Severe

## Structural Similar Compounds

| Name               | 4,4'-DIAMINO-1,1'-DIANTHRIMIDE | 5-NORBORNENE-2,3-DICARBOXYLIC ACID; 1,4,5,6,7,7-HEXACHLORO- | METHANE;TRIS(4-AMINOPHENYL)- |
|--------------------|--------------------------------|-------------------------------------------------------------|------------------------------|
| Structure          |                                |                                                             |                              |
| Actual Endpoint    | Mild                           | Moderate_Severe                                             | Moderate_Severe              |
| Predicted Endpoint | Mild                           | Moderate_Severe                                             | Moderate_Severe              |
| Distance           | 0.799                          | 0.816                                                       | 0.827                        |
| Reference          | 28ZPAK-;125;72                 | 28ZPAK-;92;72                                               | 28ZPAK-;73;72                |

## Model Applicability

Unknown features are fingerprint features in the query molecule, but not found or appearing too infrequently in the training set.

1. All properties and OPS components are within expected ranges.

## Feature Contribution

| Top features for positive contribution |             |                                      |       |                                 |
|----------------------------------------|-------------|--------------------------------------|-------|---------------------------------|
| Fingerprint                            | Bit/Smiles  | Feature Structure                    | Score | Moderate_Severe in training set |
| FCFP_10                                | -1695756380 | <p>[*]1:[cH]:[cH]:[cH]:n :[cH]:1</p> | 0.285 | 10 out of 11                    |



|                                        |             |                                                                                                                                              |        |                                    |
|----------------------------------------|-------------|----------------------------------------------------------------------------------------------------------------------------------------------|--------|------------------------------------|
| FCFP_10                                | -124655670  | 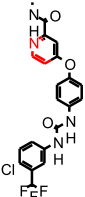<br>[*]:[cH]:[cH]:n:[*]                                   | 0.259  | 14 out of 16                       |
| FCFP_10                                | -885550502  | <br>[*]C(=[*])NC                                          | 0.239  | 54 out of 64                       |
| Top Features for negative contribution |             |                                                                                                                                              |        |                                    |
| Fingerprint                            | Bit/Smiles  | Feature Structure                                                                                                                            | Score  | Moderate_Severe<br>in training set |
| FCFP_10                                | 2104062943  | <br>[*][c]1:[*]:[cH]:[c](C=[*]):[c](Cl):[cH]:1            | -0.745 | 7 out of 24                        |
| FCFP_10                                | -174293376  | <br>[*]N[c]1:[cH]:[cH]:[c](Cl):[c]([*]):1)C([*])([*])[*] | -0.507 | 0 out of 1                         |
| FCFP_10                                | -1549103449 | <br>[*]NC(=O)[c]([*]):[*]                               | -0.504 | 2 out of 6                         |



7a

## TOPKAT\_Ocular\_Irritancy\_None\_vs\_Irritant

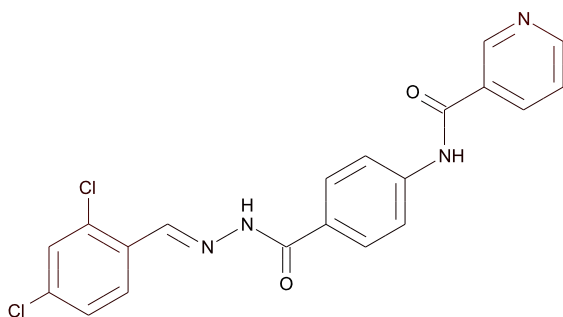C<sub>20</sub>H<sub>14</sub>Cl<sub>2</sub>N<sub>4</sub>O<sub>2</sub>

Molecular Weight: 413.25676

ALogP: 3.646

Rotatable Bonds: 5

Acceptors: 4

Donors: 2

**Model Prediction****Prediction: Irritant**

Probability: 1

Enrichment: 1.18

Bayesian Score: 3.46

Mahalanobis Distance: 4.71

Mahalanobis Distance p-value: 1

Prediction: Positive if the Bayesian score is above the estimated best cutoff value from minimizing the false positive and false negative rate.

Probability: The estimated probability that the sample is in the positive category. This assumes that the Bayesian score follows a normal distribution and is different from the prediction using a cutoff.

Enrichment: An estimate of enrichment, that is, the increased likelihood (versus random) of this sample being in the category.

Bayesian Score: The standard Laplacian-modified Bayesian score.

Mahalanobis Distance: The Mahalanobis distance (MD) is the distance to the center of the training data. The larger the MD, the less trustworthy the prediction.

Mahalanobis Distance p-value: The p-value gives the fraction of training data with an MD greater than or equal to the one for the given sample, assuming normally distributed data. The smaller the p-value, the less trustworthy the prediction. For highly non-normal X properties (e.g., fingerprints), the MD p-value is wildly inaccurate.

**Structural Similar Compounds**

| Name               | 1-AMINO-4-BENZOYLAMINO-ANTHRAQUINONE | 5-NORBORNENE-2;3-DICARBOXYLIC ACID; 1;4;5;6;7;7-HEXACHLORO- | 1-BENZOYLAMINO-4-METHOXY-5-CHLORANTHRAQUINONE |
|--------------------|--------------------------------------|-------------------------------------------------------------|-----------------------------------------------|
| Structure          |                                      |                                                             |                                               |
| Actual Endpoint    | Irritant                             | Irritant                                                    | Irritant                                      |
| Predicted Endpoint | Irritant                             | Irritant                                                    | Irritant                                      |
| Distance           | 0.623                                | 0.627                                                       | 0.677                                         |
| Reference          | 28ZPAK-;124;72                       | 28ZPAK-;92;72                                               | 28ZPAK-;90;72                                 |

**Model Applicability**

Unknown features are fingerprint features in the query molecule, but not found or appearing too infrequently in the training set.

1. All properties and OPS components are within expected ranges.
2. Unknown FCFP\_2 feature: 581019816: [\*]N\N=C\[\*]

**Feature Contribution**

| Top features for positive contribution |            |                         |       |                          |
|----------------------------------------|------------|-------------------------|-------|--------------------------|
| Fingerprint                            | Bit/Smiles | Feature Structure       | Score | Irritant in training set |
| FCFP_12                                | 1747237384 | <br>[*]:[cH]:n:[cH]:[*] | 0.208 | 44 out of 44             |



|                                        |            |                                                                                                                                           |       |                          |
|----------------------------------------|------------|-------------------------------------------------------------------------------------------------------------------------------------------|-------|--------------------------|
| FCFP_12                                | -124655670 | 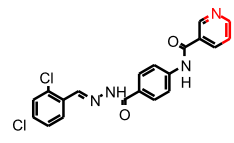<br><chem>[*]:[cH]:[cH]:n:[*]</chem>                   | 0.2   | 16 out of 16             |
| FCFP_12                                | 555188808  | <br><chem>[*][c]1:[*]:[cH]:[c](Cl):[cH]:[c]:1Cl</chem> | 0.195 | 12 out of 12             |
| Top Features for negative contribution |            |                                                                                                                                           |       |                          |
| Fingerprint                            | Bit/Smiles | Feature Structure                                                                                                                         | Score | Irritant in training set |
| FCFP_12                                | 0          | <br><chem>[*]C(=[*])[*]</chem>                         | 0     | 1184 out of 1397         |
| FCFP_12                                | 1          | <br><chem>[*]=O</chem>                               | 0     | 872 out of 1051          |
| FCFP_12                                | 203677720  | <br><chem>[*]C(=[*])[c](:[cH]:[*]):[cH]:[*]</chem>   | 0     | 319 out of 382           |



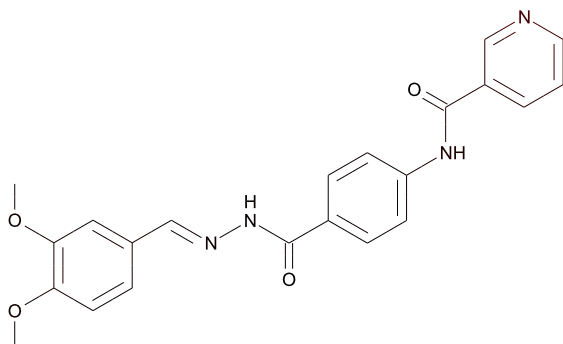
 $C_{22}H_{20}N_4O_4$ 

Molecular Weight: 404.4186

ALogP: 2.284

Rotatable Bonds: 7

Acceptors: 6

Donors: 2

## Model Prediction

**Prediction:** Irritant

Probability: 1

Enrichment: 1.18

Bayesian Score: 2.61

Mahalanobis Distance: 5.78

Mahalanobis Distance p-value: 1

Prediction: Positive if the Bayesian score is above the estimated best cutoff value from minimizing the false positive and false negative rate.

Probability: The estimated probability that the sample is in the positive category. This assumes that the Bayesian score follows a normal distribution and is different from the prediction using a cutoff.

Enrichment: An estimate of enrichment, that is, the increased likelihood (versus random) of this sample being in the category.

Bayesian Score: The standard Laplacian-modified Bayesian score.

Mahalanobis Distance: The Mahalanobis distance (MD) is the distance to the center of the training data. The larger the MD, the less trustworthy the prediction.

Mahalanobis Distance p-value: The p-value gives the fraction of training data with an MD greater than or equal to the one for the given sample, assuming normally distributed data. The smaller the p-value, the less trustworthy the prediction. For highly non-normal X properties (e.g., fingerprints), the MD p-value is wildly inaccurate.

## Structural Similar Compounds

| Name               | ANTHRAQUINONE; 1-AMINO-4-HYDROXY-2-PHENOXY- | 1-AMINO-4-BENZOYLAMINO-ANTHRAQUINONE | 2;2';-Dihydroxy-4;4'-dimethoxybenzophenone |
|--------------------|---------------------------------------------|--------------------------------------|--------------------------------------------|
| Structure          |                                             |                                      |                                            |
| Actual Endpoint    | Irritant                                    | Irritant                             | Non-Irritant                               |
| Predicted Endpoint | Irritant                                    | Irritant                             | Non-Irritant                               |
| Distance           | 0.694                                       | 0.699                                | 0.699                                      |
| Reference          | 28ZPAK 239;72                               | 28ZPAK-;124;72                       | J. Am. Coll. Toxicol. 2(5):35;1983         |

## Model Applicability

Unknown features are fingerprint features in the query molecule, but not found or appearing too infrequently in the training set.

- All properties and OPS components are within expected ranges.
- Unknown FCFP\_2 feature: 581019816: [\*]N\N=C\[\*]

## Feature Contribution

| Top features for positive contribution |            |                         |       |                          |
|----------------------------------------|------------|-------------------------|-------|--------------------------|
| Fingerprint                            | Bit/Smiles | Feature Structure       | Score | Irritant in training set |
| FCFP_12                                | 1747237384 | <br>[*]:[cH]:n:[cH]:[*] | 0.208 | 44 out of 44             |



|                                        |             |                                                                                                                                     |       |                          |
|----------------------------------------|-------------|-------------------------------------------------------------------------------------------------------------------------------------|-------|--------------------------|
| FCFP_12                                | -124655670  | 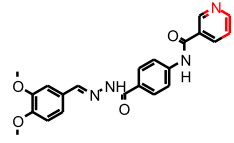<br>[*]:[cH]:[cH]:n:[*]                          | 0.2   | 16 out of 16             |
| FCFP_12                                | -1695756380 | <br>[*]1:[cH]:[cH]:[cH]:n<br>:[cH]:1             | 0.194 | 11 out of 11             |
| Top Features for negative contribution |             |                                                                                                                                     |       |                          |
| Fingerprint                            | Bit/Smiles  | Feature Structure                                                                                                                   | Score | Irritant in training set |
| FCFP_12                                | 203677720   | <br>[*]C(=[*])[c](:[cH]:[*]):[cH]:[*]            | 0     | 319 out of 382           |
| FCFP_12                                | -1925475824 | <br>[*]:[cH]:[c](:[cH]:[*])C(=O)N[c](:[*]):[*] | 0     | 4 out of 5               |
| FCFP_12                                | 1175232969  | <br>[*]:[cH]:[c](NC(=O)[c](:[*]):[*]):[cH]:[*] | 0     | 4 out of 5               |



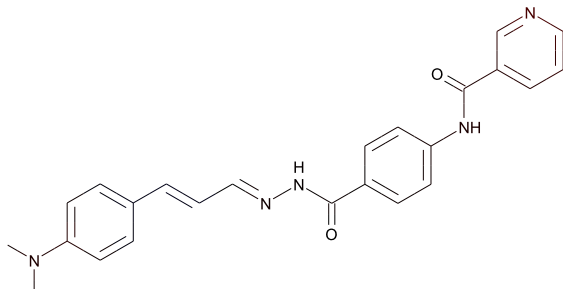
 $C_{24}H_{23}N_5O_2$ 

Molecular Weight: 413.47172

ALogP: 2.839

Rotatable Bonds: 7

Acceptors: 5

Donors: 2

## Model Prediction

**Prediction:** Irritant

Probability: 1

Enrichment: 1.18

Bayesian Score: 1.91

Mahalanobis Distance: 7.32

Mahalanobis Distance p-value: 0.993

Prediction: Positive if the Bayesian score is above the estimated best cutoff value from minimizing the false positive and false negative rate.

Probability: The estimated probability that the sample is in the positive category. This assumes that the Bayesian score follows a normal distribution and is different from the prediction using a cutoff.

Enrichment: An estimate of enrichment, that is, the increased likelihood (versus random) of this sample being in the category.

Bayesian Score: The standard Laplacian-modified Bayesian score.

Mahalanobis Distance: The Mahalanobis distance (MD) is the distance to the center of the training data. The larger the MD, the less trustworthy the prediction.

Mahalanobis Distance p-value: The p-value gives the fraction of training data with an MD greater than or equal to the one for the given sample, assuming normally distributed data. The smaller the p-value, the less trustworthy the prediction. For highly non-normal X properties (e.g., fingerprints), the MD p-value is wildly inaccurate.

## Structural Similar Compounds

| Name               | 5-NORBORNENE-2;3-DICARBOXYLIC ACID; 1;4;5;6;7;7-HEXACHLORO- | 1-AMINO-4-BENZOYLAMINO-ANTHRAQUINONE | ANTHRAQUINONE; 1-AMINO-4-HYDROXY-2-PHENOXY- |
|--------------------|-------------------------------------------------------------|--------------------------------------|---------------------------------------------|
| Structure          |                                                             |                                      |                                             |
| Actual Endpoint    | Irritant                                                    | Irritant                             | Irritant                                    |
| Predicted Endpoint | Irritant                                                    | Irritant                             | Irritant                                    |
| Distance           | 0.671                                                       | 0.674                                | 0.699                                       |
| Reference          | 28ZPAK-;92;72                                               | 28ZPAK-;124;72                       | 28ZPAK 239;72                               |

## Model Applicability

Unknown features are fingerprint features in the query molecule, but not found or appearing too infrequently in the training set.

1. All properties and OPS components are within expected ranges.
2. Unknown FCFP\_2 feature: 581019816: [\*]N\N=C\[\*]

## Feature Contribution

| Top features for positive contribution |            |                         |       |                          |
|----------------------------------------|------------|-------------------------|-------|--------------------------|
| Fingerprint                            | Bit/Smiles | Feature Structure       | Score | Irritant in training set |
| FCFP_12                                | 1747237384 | <br>[*]:[cH]:n:[cH]:[*] | 0.208 | 44 out of 44             |



| FCFP_12                                | -124655670  | 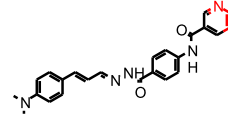<br>[*]:[cH]:[cH]:n:[*]                        | 0.2    | 16 out of 16             |
|----------------------------------------|-------------|-----------------------------------------------------------------------------------------------------------------------------------|--------|--------------------------|
| FCFP_12                                | -1695756380 | <br>[*]1:[cH]:[cH]:[cH]:n<br>:[cH]:1           | 0.194  | 11 out of 11             |
| Top Features for negative contribution |             |                                                                                                                                   |        |                          |
| Fingerprint                            | Bit/Smiles  | Feature Structure                                                                                                                 | Score  | Irritant in training set |
| FCFP_12                                | -1078052987 | <br>[*]\C=C\[c]1:[cH]:[cH]<br>:[*]:[cH]:[cH]:1 | -0.344 | 2 out of 4               |
| FCFP_12                                | -146015125  | <br>[*]=C\C=C\[c](:[cH]:[<br>*]):[cH]:[*]     | -0.268 | 1 out of 2               |
| FCFP_12                                | 451371068   | <br>[*]\C=C\[c](:[*]):[*]                    | -0.167 | 6 out of 9               |



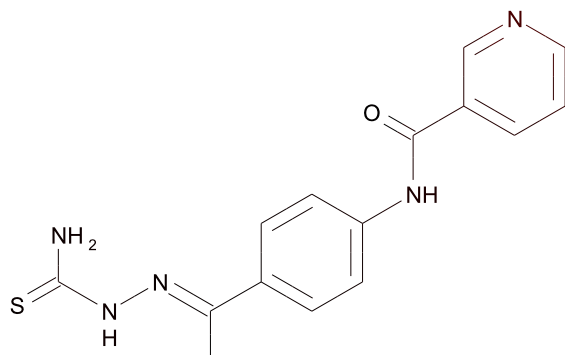

$C_{15}H_{15}N_5OS$

Molecular Weight: 313.3775

ALogP: 1.414

Rotatable Bonds: 5

Acceptors: 4

Donors: 3

## Model Prediction

**Prediction: Irritant**

Probability: 1

Enrichment: 1.18

Bayesian Score: 2.19

Mahalanobis Distance: 5.99

Mahalanobis Distance p-value: 1

Prediction: Positive if the Bayesian score is above the estimated best cutoff value from minimizing the false positive and false negative rate.

Probability: The estimated probability that the sample is in the positive category. This assumes that the Bayesian score follows a normal distribution and is different from the prediction using a cutoff.

Enrichment: An estimate of enrichment, that is, the increased likelihood (versus random) of this sample being in the category.

Bayesian Score: The standard Laplacian-modified Bayesian score.

Mahalanobis Distance: The Mahalanobis distance (MD) is the distance to the center of the training data. The larger the MD, the less trustworthy the prediction.

Mahalanobis Distance p-value: The p-value gives the fraction of training data with an MD greater than or equal to the one for the given sample, assuming normally distributed data. The smaller the p-value, the less trustworthy the prediction. For highly non-normal X properties (e.g., fingerprints), the MD p-value is wildly inaccurate.

## Structural Similar Compounds

| Name               | 2-NAPHTHALENESULFONIC ACID; 4-HYDROXY-7-(METHYLAMINO)- | ANTHRAQUINONE; 1-((2-HYDROXYETHYL)AMINO)-4-(METHYLAMINO)- | O-TOLUENESULFONAMIDE; 4-AMINO-N-(2-HYDROXYETHYL)- |
|--------------------|--------------------------------------------------------|-----------------------------------------------------------|---------------------------------------------------|
| Structure          |                                                        |                                                           |                                                   |
| Actual Endpoint    | Irritant                                               | Irritant                                                  | Irritant                                          |
| Predicted Endpoint | Irritant                                               | Irritant                                                  | Irritant                                          |
| Distance           | 0.599                                                  | 0.638                                                     | 0.641                                             |
| Reference          | 28ZPAK 190;72                                          | 28ZPAK 245;72                                             | 28ZPAK-;200;72                                    |

## Model Applicability

Unknown features are fingerprint features in the query molecule, but not found or appearing too infrequently in the training set.

1. All properties and OPS components are within expected ranges.
2. Unknown FCFP\_2 feature: 581019816: [\*]N\N=C\[\*]

## Feature Contribution

| Top features for positive contribution |            |                            |       |                          |
|----------------------------------------|------------|----------------------------|-------|--------------------------|
| Fingerprint                            | Bit/Smiles | Feature Structure          | Score | Irritant in training set |
| FCFP_12                                | 1747237384 | <p>[*].[cH]:n:[cH]:[*]</p> | 0.208 | 44 out of 44             |



|                                        |             |                                                                                                                                            |       |                          |
|----------------------------------------|-------------|--------------------------------------------------------------------------------------------------------------------------------------------|-------|--------------------------|
| FCFP_12                                | -124655670  | 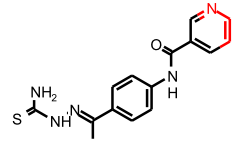<br>[*]:[cH]:[cH]:n:[*]                                 | 0.2   | 16 out of 16             |
| FCFP_12                                | -1695756380 | <br>[*]1:[cH]:[cH]:[cH]:n<br>:[cH]:1                    | 0.194 | 11 out of 11             |
| Top Features for negative contribution |             |                                                                                                                                            |       |                          |
| Fingerprint                            | Bit/Smiles  | Feature Structure                                                                                                                          | Score | Irritant in training set |
| FCFP_12                                | -581162801  | <br>[*]N=C(/C)([c]1:[cH]<br>:[cH]:[*]:[cH]:[cH]:<br>1   | 0     | 7 out of 9               |
| FCFP_12                                | -773983804  | <br>[*]N[c]1:[cH]:[*]:[c]<br>([*]):[cH]:[cH]:1         | 0     | 102 out of 121           |
| FCFP_12                                | 1175232969  | <br>[*]:[cH]:[c](NC(=O)[c]<br>:[*]):[*]:[cH]:[*]<br>] | 0     | 4 out of 5               |



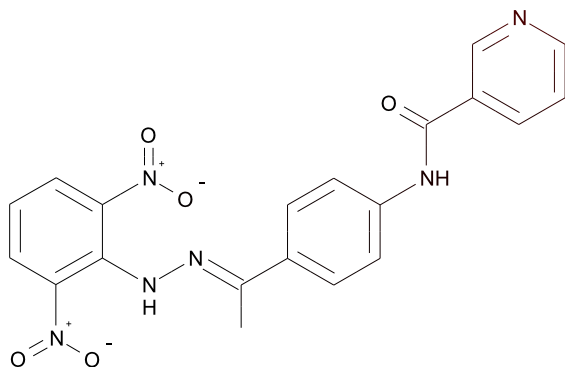
 $C_{20}H_{16}N_6O_5$ 

Molecular Weight: 420.37824

ALogP: 2.852

Rotatable Bonds: 7

Acceptors: 8

Donors: 2

## Model Prediction

**Prediction: Irritant**

Probability: 1

Enrichment: 1.18

Bayesian Score: 1.86

Mahalanobis Distance: 5.27

Mahalanobis Distance p-value: 1

Prediction: Positive if the Bayesian score is above the estimated best cutoff value from minimizing the false positive and false negative rate.

Probability: The estimated probability that the sample is in the positive category. This assumes that the Bayesian score follows a normal distribution and is different from the prediction using a cutoff.

Enrichment: An estimate of enrichment, that is, the increased likelihood (versus random) of this sample being in the category.

Bayesian Score: The standard Laplacian-modified Bayesian score.

Mahalanobis Distance: The Mahalanobis distance (MD) is the distance to the center of the training data. The larger the MD, the less trustworthy the prediction.

Mahalanobis Distance p-value: The p-value gives the fraction of training data with an MD greater than or equal to the one for the given sample, assuming normally distributed data. The smaller the p-value, the less trustworthy the prediction. For highly non-normal X properties (e.g., fingerprints), the MD p-value is wildly inaccurate.

## Structural Similar Compounds

| Name               | 4,4'-DIAMINO-1,1'-DIANTHRIMIDE | 2,2'-Stilbenedisulfonic acid; 4,4'-dinitro-                             | ANTHRAQUINONE; 1-AMINO-4-HYDROXY-2-PHENOXY- |
|--------------------|--------------------------------|-------------------------------------------------------------------------|---------------------------------------------|
| Structure          |                                |                                                                         |                                             |
| Actual Endpoint    | Irritant                       | Irritant                                                                | Irritant                                    |
| Predicted Endpoint | Irritant                       | Irritant                                                                | Irritant                                    |
| Distance           | 0.767                          | 0.797                                                                   | 0.822                                       |
| Reference          | 28ZPAK-;125;72                 | Prehled Prumyslove Toxikologie; Organicke Latky; Marhold; J. pp 1062;86 | 28ZPAK 239;72                               |

## Model Applicability

Unknown features are fingerprint features in the query molecule, but not found or appearing too infrequently in the training set.

1. All properties and OPS components are within expected ranges.
2. Unknown FCFP\_2 feature: 581019816: [\*]N\N=C\[\*]
3. Unknown FCFP\_2 feature: 1294285001: [\*]=NN[c](:[\*]):[\*]
4. Unknown FCFP\_2 feature: -828984032: [\*][c](:[\*]):[c]([N+](=[\*])[\*]):c:[\*]
5. Unknown FCFP\_2 feature: -1338588315: [\*]:[c](:[\*])[N+](=O)[O-]
6. Unknown FCFP\_2 feature: 1872392852: [\*][N+](=O)[\*]
7. Unknown FCFP\_2 feature: 260476081: [\*][N+](=[\*])[O-]

## Feature Contribution

### Top features for positive contribution

| Fingerprint | Bit/Smiles | Feature Structure | Score | Irritant in training set |
|-------------|------------|-------------------|-------|--------------------------|
|-------------|------------|-------------------|-------|--------------------------|



|                                        |             |                                                                                                                                    |         |                          |
|----------------------------------------|-------------|------------------------------------------------------------------------------------------------------------------------------------|---------|--------------------------|
| FCFP_12                                | 1747237384  | 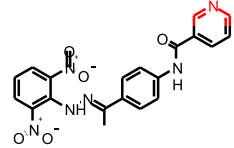<br>[*]:[cH]:n:[cH]:[*]                         | 0.208   | 44 out of 44             |
| FCFP_12                                | -124655670  | <br>[*]:[cH]:[cH]:n:[*]                         | 0.2     | 16 out of 16             |
| FCFP_12                                | -1695756380 | <br>[*]1:[cH]:[cH]:[cH]:n<br>:[cH]:1            | 0.194   | 11 out of 11             |
| Top Features for negative contribution |             |                                                                                                                                    |         |                          |
| Fingerprint                            | Bit/Smiles  | Feature Structure                                                                                                                  | Score   | Irritant in training set |
| FCFP_12                                | 8           | <br>[*][N+](=[*])[*]                           | -0.0561 | 3 out of 4               |
| FCFP_12                                | 991735244   | <br>[*][c]1:[*]:[c]([*]):<br>[cH]:[cH]:[cH]:1 | 0       | 237 out of 291           |



|         |            |                                                                                                                                                                                      |   |            |
|---------|------------|--------------------------------------------------------------------------------------------------------------------------------------------------------------------------------------|---|------------|
| FCFP_12 | -581162801 | 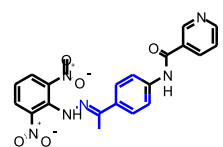<br><chem>[*]N=C(/C)([c]1:[cH]:[cH]:[cH]:[cH]:[cH]1)Nc2cc([N+](=O)[O-])cc([N+](=O)[O-])cc2</chem> | 0 | 7 out of 9 |
|---------|------------|--------------------------------------------------------------------------------------------------------------------------------------------------------------------------------------|---|------------|



# Sorafenib

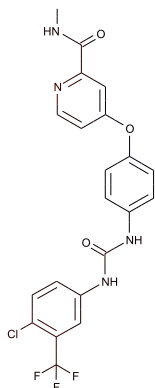

$C_{21}H_{16}ClF_3N_4O_3$

Molecular Weight: 464.82494

ALogP: 4.175

Rotatable Bonds: 6

Acceptors: 4

Donors: 3

## Model Prediction

**Prediction: Irritant**

Probability: 1

Enrichment: 1.18

Bayesian Score: 3.04

Mahalanobis Distance: 6.28

Mahalanobis Distance p-value: 1

Prediction: Positive if the Bayesian score is above the estimated best cutoff value from minimizing the false positive and false negative rate.

Probability: The estimated probability that the sample is in the positive category. This assumes that the Bayesian score follows a normal distribution and is different from the prediction using a cutoff.

Enrichment: An estimate of enrichment, that is, the increased likelihood (versus random) of this sample being in the category.

Bayesian Score: The standard Laplacian-modified Bayesian score.

Mahalanobis Distance: The Mahalanobis distance (MD) is the distance to the center of the training data. The larger the MD, the less trustworthy the prediction.

Mahalanobis Distance p-value: The p-value gives the fraction of training data with an MD greater than or equal to the one for the given sample, assuming normally distributed data. The smaller the p-value, the less trustworthy the prediction. For highly non-normal X properties (e.g., fingerprints), the MD p-value is wildly inaccurate.

# TOPKAT\_Ocular\_Irritancy\_None\_vs\_Irritant

## Structural Similar Compounds

| Name               | BENZANILIDE;2';2'''-DITHIOBIS- | 4;4'-DIAMINO-1;1'-DIANTHRIMIDE | 5-NORBORNENE-2;3-DICARBOXYLIC ACID;1;4;5;6;7;7-HEXACHLORO- |
|--------------------|--------------------------------|--------------------------------|------------------------------------------------------------|
| Structure          |                                |                                |                                                            |
| Actual Endpoint    | Non-Irritant                   | Irritant                       | Irritant                                                   |
| Predicted Endpoint | Non-Irritant                   | Irritant                       | Irritant                                                   |
| Distance           | 0.743                          | 0.791                          | 0.801                                                      |
| Reference          | 28ZPAK-;173;72                 | 28ZPAK-;125;72                 | 28ZPAK-;92;72                                              |

## Model Applicability

Unknown features are fingerprint features in the query molecule, but not found or appearing too infrequently in the training set.

- All properties and OPS components are within expected ranges.

## Feature Contribution

| Top features for positive contribution |            |                         |       |                          |
|----------------------------------------|------------|-------------------------|-------|--------------------------|
| Fingerprint                            | Bit/Smiles | Feature Structure       | Score | Irritant in training set |
| FCFP_12                                | 1747237384 | <br>[*]:[cH]:n:[cH]:[*] | 0.208 | 44 out of 44             |



|                                        |             |                                                                                                                                                                 |        |                          |
|----------------------------------------|-------------|-----------------------------------------------------------------------------------------------------------------------------------------------------------------|--------|--------------------------|
| FCFP_12                                | -124655670  | 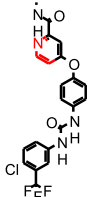<br>[*]:[cH]:[cH]:n:[*]                                                      | 0.2    | 16 out of 16             |
| FCFP_12                                | -1539132615 | <br>[*]C(=[*])[c]:[cH]:[*]:n:[*]                                             | 0.197  | 13 out of 13             |
| Top Features for negative contribution |             |                                                                                                                                                                 |        |                          |
| Fingerprint                            | Bit/Smiles  | Feature Structure                                                                                                                                               | Score  | Irritant in training set |
| FCFP_12                                | -747629521  | <br>[*]N[c]1:[cH]:[cH]:[c](O[c]([*]):[*]):[cH]:1                             | -0.268 | 1 out of 2               |
| FCFP_12                                | 702861189   | <br>[*]N[c]1:[cH]:[cH]:[c](O[c]2:[cH]:[cH]:[*]):[c]([*]):[cH]:2:[cH]:[cH]:1 | -0.268 | 1 out of 2               |
| FCFP_12                                | 859018953   | <br>[*][c]1:[cH]:[cH]:[c](O[c]([*]):[cH]):[cH]:[cH]:1                      | 0      | 7 out of 9               |



7a

## TOPKAT\_Rat\_Female\_FDA\_None\_vs\_Carcinogen

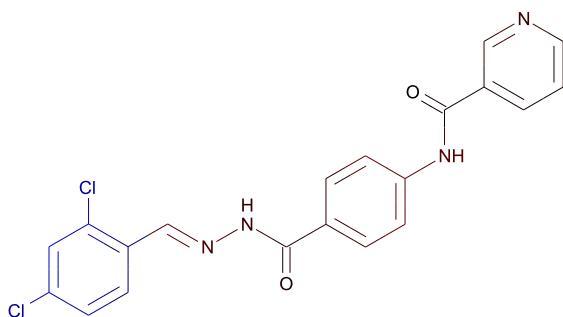C<sub>20</sub>H<sub>14</sub>Cl<sub>2</sub>N<sub>4</sub>O<sub>2</sub>

Molecular Weight: 413.25676

ALogP: 3.646

Rotatable Bonds: 5

Acceptors: 4

Donors: 2

**Model Prediction****Prediction: Carcinogen**

Probability: 0.291

Enrichment: 0.903

Bayesian Score: -0.399

Mahalanobis Distance: 12.8

Mahalanobis Distance p-value: 0.000265

Prediction: Positive if the Bayesian score is above the estimated best cutoff value from minimizing the false positive and false negative rate.

Probability: The estimated probability that the sample is in the positive category. This assumes that the Bayesian score follows a normal distribution and is different from the prediction using a cutoff.

Enrichment: An estimate of enrichment, that is, the increased likelihood (versus random) of this sample being in the category.

Bayesian Score: The standard Laplacian-modified Bayesian score.

Mahalanobis Distance: The Mahalanobis distance (MD) is the distance to the center of the training data. The larger the MD, the less trustworthy the prediction.

Mahalanobis Distance p-value: The p-value gives the fraction of training data with an MD greater than or equal to the one for the given sample, assuming normally distributed data. The smaller the p-value, the less trustworthy the prediction. For highly non-normal X properties (e.g., fingerprints), the MD p-value is wildly inaccurate.

**Structural Similar Compounds**

| Name               | Bicalutamide                                                        | Doxefazepam                                                         | Indomethacin                                                        |
|--------------------|---------------------------------------------------------------------|---------------------------------------------------------------------|---------------------------------------------------------------------|
| Structure          |                                                                     |                                                                     |                                                                     |
| Actual Endpoint    | Carcinogen                                                          | Carcinogen                                                          | Non-Carcinogen                                                      |
| Predicted Endpoint | Carcinogen                                                          | Carcinogen                                                          | Non-Carcinogen                                                      |
| Distance           | 0.627                                                               | 0.652                                                               | 0.654                                                               |
| Reference          | US FDA (Centre for Drug Eval.& Res./Off. Testing & Res.) Sept. 1997 | US FDA (Centre for Drug Eval.& Res./Off. Testing & Res.) Sept. 1997 | US FDA (Centre for Drug Eval.& Res./Off. Testing & Res.) Sept. 1997 |

**Model Applicability**

Unknown features are fingerprint features in the query molecule, but not found or appearing too infrequently in the training set.

1. All properties and OPS components are within expected ranges.
2. Unknown ECFP\_2 feature: 1335702447: [\*][c](:[\*]):[c](C=[\*]):c:[\*]

**Feature Contribution****Top features for positive contribution**

| Fingerprint | Bit/Smiles  | Feature Structure       | Score | Carcinogen in training set |
|-------------|-------------|-------------------------|-------|----------------------------|
| ECFP_12     | -1832102709 | <br>[*]N=C[c](:[*]):[*] | 0.693 | 6 out of 8                 |



| ECFP_12                                | -223149939 | 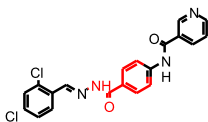<br><chem>[*]NC(=O)[c]1:[cH]:[cH]:[*]:[cH]:[cH]:1</chem> | 0.613  | 2 out of 2                 |
|----------------------------------------|------------|---------------------------------------------------------------------------------------------------------------------------------------------|--------|----------------------------|
| ECFP_12                                | -177077903 | <br><chem>[*]N[c](:[cH]:[*]):[cH]:[*]</chem>             | 0.529  | 6 out of 10                |
| Top Features for negative contribution |            |                                                                                                                                             |        |                            |
| Fingerprint                            | Bit/Smiles | Feature Structure                                                                                                                           | Score  | Carcinogen in training set |
| ECFP_12                                | 1335691903 | <br><chem>[*][c](:[*]):[c](Cl):[cH]:[*]</chem>           | -1.11  | 2 out of 26                |
| ECFP_12                                | 99947387   | <br><chem>[*]:[c](:[*])Cl</chem>                       | -0.817 | 8 out of 62                |
| ECFP_12                                | 1854732111 | <br><chem>[*][c]1:[*]:[cH]:[c](Cl):[cH]:[cH]:1</chem>  | -0.816 | 4 out of 33                |



7b

## TOPKAT\_Rat\_Female\_FDA\_None\_vs\_Carcinogen

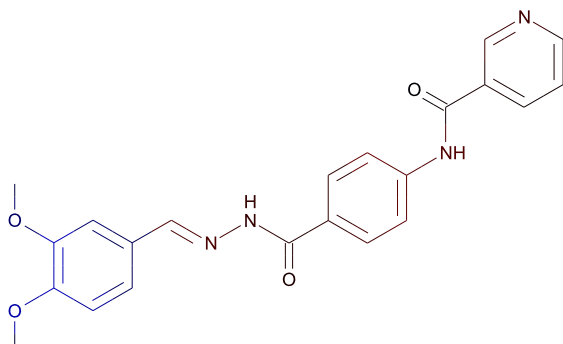C<sub>22</sub>H<sub>20</sub>N<sub>4</sub>O<sub>4</sub>

Molecular Weight: 404.4186

ALogP: 2.284

Rotatable Bonds: 7

Acceptors: 6

Donors: 2

**Model Prediction****Prediction: Carcinogen**

Probability: 0.289

Enrichment: 0.896

Bayesian Score: -0.502

Mahalanobis Distance: 13.3

Mahalanobis Distance p-value: 4.06e-005

Prediction: Positive if the Bayesian score is above the estimated best cutoff value from minimizing the false positive and false negative rate.

Probability: The estimated probability that the sample is in the positive category. This assumes that the Bayesian score follows a normal distribution and is different from the prediction using a cutoff.

Enrichment: An estimate of enrichment, that is, the increased likelihood (versus random) of this sample being in the category.

Bayesian Score: The standard Laplacian-modified Bayesian score.

Mahalanobis Distance: The Mahalanobis distance (MD) is the distance to the center of the training data. The larger the MD, the less trustworthy the prediction.

Mahalanobis Distance p-value: The p-value gives the fraction of training data with an MD greater than or equal to the one for the given sample, assuming normally distributed data. The smaller the p-value, the less trustworthy the prediction. For highly non-normal X properties (e.g., fingerprints), the MD p-value is wildly inaccurate.

**Structural Similar Compounds**

| Name               | Bicalutamide                                                        | Amlodipine                                                          | Moricizine                                                          |
|--------------------|---------------------------------------------------------------------|---------------------------------------------------------------------|---------------------------------------------------------------------|
| Structure          |                                                                     |                                                                     |                                                                     |
| Actual Endpoint    | Carcinogen                                                          | Non-Carcinogen                                                      | Carcinogen                                                          |
| Predicted Endpoint | Carcinogen                                                          | Non-Carcinogen                                                      | Carcinogen                                                          |
| Distance           | 0.609                                                               | 0.622                                                               | 0.644                                                               |
| Reference          | US FDA (Centre for Drug Eval.& Res./Off. Testing & Res.) Sept. 1997 | US FDA (Centre for Drug Eval.& Res./Off. Testing & Res.) Sept. 1997 | US FDA (Centre for Drug Eval.& Res./Off. Testing & Res.) Sept. 1997 |

**Model Applicability**

Unknown features are fingerprint features in the query molecule, but not found or appearing too infrequently in the training set.

1. All properties and OPS components are within expected ranges.
2. Unknown ECFP\_2 feature: -176483725: [\*]=C[c](:c:[\*]):c:[\*]

**Feature Contribution****Top features for positive contribution**

| Fingerprint | Bit/Smiles  | Feature Structure            | Score | Carcinogen in training set |
|-------------|-------------|------------------------------|-------|----------------------------|
| ECFP_12     | -1832102709 | <br>[*]\N=C[c](:c:[*]):c:[*] | 0.693 | 6 out of 8                 |



| ECFP_12                                | -223149939 | 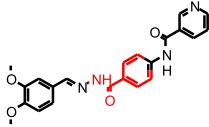<br><chem>[*]NC(=O)[c]1:[cH]:[cH]:[cH]:[*]:[cH]:[cH]:1</chem> | 0.613  | 2 out of 2                 |
|----------------------------------------|------------|--------------------------------------------------------------------------------------------------------------------------------------------------|--------|----------------------------|
| ECFP_12                                | -177077903 | <br><chem>[*]N[c](:[cH]:[*]):[cH]:[*]</chem>                  | 0.529  | 6 out of 10                |
| Top Features for negative contribution |            |                                                                                                                                                  |        |                            |
| Fingerprint                            | Bit/Smiles | Feature Structure                                                                                                                                | Score  | Carcinogen in training set |
| ECFP_12                                | 2077607946 | <br><chem>[*]O[c]1:[cH]:[cH]:[c]([(*)]):[*]:[c]:1[*]</chem>   | -1.25  | 0 out of 8                 |
| ECFP_12                                | -468366781 | <br><chem>[*]O[c]1:[cH]:[*]:[c]([(*)]):[cH]:[c]:1OC</chem>  | -0.941 | 0 out of 5                 |
| ECFP_12                                | 1408898974 | <br><chem>[*]O[c](:[cH]:[*]):[c]([(*)]):[*]</chem>          | -0.517 | 5 out of 29                |



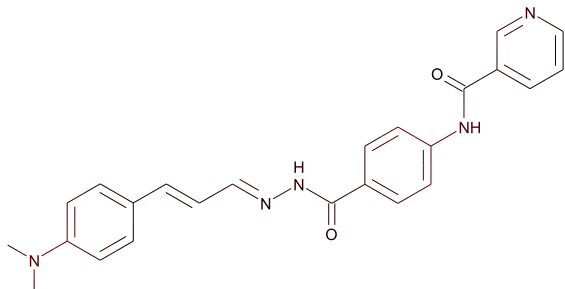
$$\text{C}_{24}\text{H}_{23}\text{N}_5\text{O}_2$$

Molecular Weight: 413.47172

|ALogP: 2.839

Rotatable Bonds: 7

Acceptors: 5

Donors: 2

## Model Prediction

**Prediction: Carcinogen**

Probability: 0.443

Enrichment: 1.38

Bayesian Score: 5.5

Mahalanobis Distance: 13.1

Mahalanobis Distance p-value: 0.000107

Prediction: Positive if the Bayesian score is above the estimated best cutoff value from minimizing the false positive and false negative rate.

**Probability:** The estimated probability that the sample is in the positive category. This assumes that the Bayesian score follows a normal distribution and is different from the prediction using a cutoff.

Enrichment: An estimate of enrichment, that is, the increased likelihood (versus random) of this sample being in the category.  
Bayesian Score: The standard Laplacian-modified Bayesian score.

**Mahalanobis Distance:** The Mahalanobis distance (MD) is the distance to the center of the training data. The larger the MD, the less trustworthy the prediction.

Mahalanobis Distance p-value: The p-value gives the fraction of training data with an MD greater than or equal to the one for the given sample, assuming normally distributed data. The smaller the p-value, the less trustworthy the prediction. For highly non-normal X properties (e.g., fingerprints), the MD p-value is wildly inaccurate.

## Structural Similar Compounds

| Name               | Bicalutamide                                                                        | Flecainide                                                                          | Moricizine                                                                          |
|--------------------|-------------------------------------------------------------------------------------|-------------------------------------------------------------------------------------|-------------------------------------------------------------------------------------|
| Structure          | 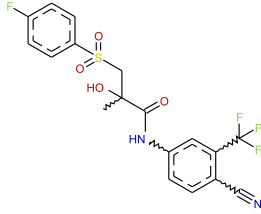 |  |  |
| Actual Endpoint    | Carcinogen                                                                          | Non-Carcinogen                                                                      | Carcinogen                                                                          |
| Predicted Endpoint | Carcinogen                                                                          | Non-Carcinogen                                                                      | Carcinogen                                                                          |
| Distance           | 0.602                                                                               | 0.655                                                                               | 0.657                                                                               |
| Reference          | US FDA (Centre for Drug Eval.& Res./Off. Testing & Res.) Sept. 1997                 | US FDA (Centre for Drug Eval.& Res./Off. Testing & Res.) Sept. 1997                 | US FDA (Centre for Drug Eval.& Res./Off. Testing & Res.) Sept. 1997                 |

## Model Applicability

Unknown features are fingerprint features in the query molecule, but not found or appearing too infrequently in the training set.

1. All properties and OPS components are within expected ranges.
2. Unknown ECFP\_2 feature: -984423246: [\*]\N=C\C=[\*]
3. Unknown ECFP\_2 feature: -176483725: [\*]=C[c](:c:[\*]):c:[\*]

## Feature Contribution

## Top features for positive contribution

| Fingerprint | Bit/Smiles | Feature Structure                                                                                                                              | Score | Carcinogen in training set |
|-------------|------------|------------------------------------------------------------------------------------------------------------------------------------------------|-------|----------------------------|
| ECFP_12     | -223149939 | 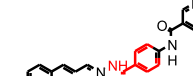<br><chem>[*]NC(=O)[c]1:[cH]:[cH]:[c]1:[cH]:[cH]:1</chem> | 0.613 | 2 out of 2                 |

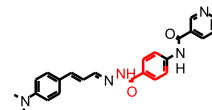



| ECFP_12                                | -1328426694 | 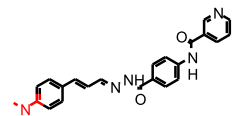<br><chem>[*]:[c](:[*])N(C)C</chem>                                     | 0.613  | 2 out of 2                 |
|----------------------------------------|-------------|------------------------------------------------------------------------------------------------------------------------------------------------------------|--------|----------------------------|
| ECFP_12                                | -1140900255 | <br><chem>[*]N([*])[c]1:[cH]:[*]<br/>]:[c]([*]):[cH]:[cH]<br/>:1</chem> | 0.575  | 3 out of 4                 |
| Top Features for negative contribution |             |                                                                                                                                                            |        |                            |
| Fingerprint                            | Bit/Smiles  | Feature Structure                                                                                                                                          | Score  | Carcinogen in training set |
| ECFP_12                                | 1997021792  | <br><chem>[*]:[cH]:[cH]:[cH]:[*]<br/>]</chem>                           | -0.296 | 36 out of 156              |
| ECFP_12                                | 1451403962  | <br><chem>[*]C(=[*])[c]1:[cH]:[*]<br/>*: [cH]:[cH]:[cH]:1</chem>       | -0.248 | 1 out of 5                 |
| ECFP_12                                | 1430169877  | <br><chem>[*]NC(=O)[c](:[*]):[*]<br/>]</chem>                         | -0.172 | 3 out of 12                |



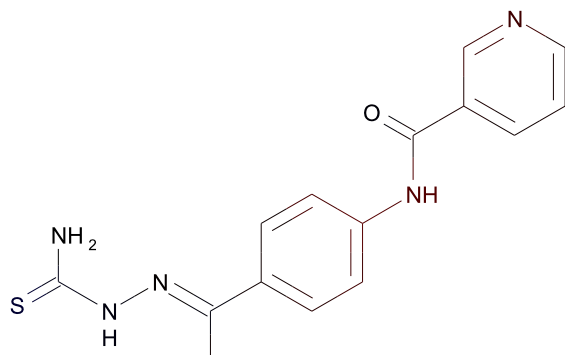

$C_{15}H_{15}N_5OS$

Molecular Weight: 313.3775

ALogP: 1.414

Rotatable Bonds: 5

Acceptors: 4

Donors: 3

## Model Prediction

Prediction: Carcinogen

Probability: 0.328

Enrichment: 1.02

Bayesian Score: 1.36

Mahalanobis Distance: 12.9

Mahalanobis Distance p-value: 0.00024

Prediction: Positive if the Bayesian score is above the estimated best cutoff value from minimizing the false positive and false negative rate.

Probability: The estimated probability that the sample is in the positive category. This assumes that the Bayesian score follows a normal distribution and is different from the prediction using a cutoff.

Enrichment: An estimate of enrichment, that is, the increased likelihood (versus random) of this sample being in the category.

Bayesian Score: The standard Laplacian-modified Bayesian score.

Mahalanobis Distance: The Mahalanobis distance (MD) is the distance to the center of the training data. The larger the MD, the less trustworthy the prediction.

Mahalanobis Distance p-value: The p-value gives the fraction of training data with an MD greater than or equal to the one for the given sample, assuming normally distributed data. The smaller the p-value, the less trustworthy the prediction. For highly non-normal X properties (e.g., fingerprints), the MD p-value is wildly inaccurate.

## Structural Similar Compounds

| Name               | Furosemide                                                          | Tolbutamide                                                         | Chloramphenicol                                                     |
|--------------------|---------------------------------------------------------------------|---------------------------------------------------------------------|---------------------------------------------------------------------|
| Structure          |                                                                     |                                                                     |                                                                     |
| Actual Endpoint    | Non-Carcinogen                                                      | Non-Carcinogen                                                      | Non-Carcinogen                                                      |
| Predicted Endpoint | Non-Carcinogen                                                      | Non-Carcinogen                                                      | Non-Carcinogen                                                      |
| Distance           | 0.582                                                               | 0.586                                                               | 0.587                                                               |
| Reference          | US FDA (Centre for Drug Eval.& Res./Off. Testing & Res.) Sept. 1997 | US FDA (Centre for Drug Eval.& Res./Off. Testing & Res.) Sept. 1997 | US FDA (Centre for Drug Eval.& Res./Off. Testing & Res.) Sept. 1997 |

## Model Applicability

Unknown features are fingerprint features in the query molecule, but not found or appearing too infrequently in the training set.

- OPS PC22 out of range. Value: -3.728. Training min, max, SD, explained variance: -3.7128, 3.0259, 1.157, 0.0141.
- Unknown ECFP\_2 feature: 128986386: [\*]N=C(/C)[c](:[\*]):[\*]
- Unknown ECFP\_2 feature: -571028867: [\*]NC(=S)N

## Feature Contribution

| Top features for positive contribution |            |                                 |       |                            |
|----------------------------------------|------------|---------------------------------|-------|----------------------------|
| Fingerprint                            | Bit/Smiles | Feature Structure               | Score | Carcinogen in training set |
| ECFP_12                                | -177077903 | <br>[*]N[c](:[cH]:[*]):[cH]:[*] | 0.529 | 6 out of 10                |



|                                        |             |                                                                                                                                                             |        |                            |
|----------------------------------------|-------------|-------------------------------------------------------------------------------------------------------------------------------------------------------------|--------|----------------------------|
| ECFP_12                                | -1236483485 | 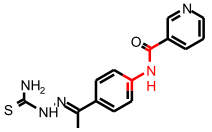<br><chem>[*]C(=[*])N[c](:[*]):</chem><br><chem>[*]</chem>               | 0.46   | 9 out of 17                |
| ECFP_12                                | 888054369   | <br><chem>[*]N[c]1:[cH]:[*]:[c]</chem><br><chem>([*]):[cH]:[cH]:1</chem> | 0.454  | 5 out of 9                 |
| Top Features for negative contribution |             |                                                                                                                                                             |        |                            |
| Fingerprint                            | Bit/Smiles  | Feature Structure                                                                                                                                           | Score  | Carcinogen in training set |
| ECFP_12                                | 1979182050  | <br><chem>[*]C(=S)[*]</chem>                                             | -0.485 | 0 out of 2                 |
| ECFP_12                                | -845108448  | <br><chem>[*]=S</chem>                                                  | -0.485 | 0 out of 2                 |
| ECFP_12                                | 1997021792  | <br><chem>[*]:[cH]:[cH]:[cH]:[*]</chem><br><chem>]</chem>              | -0.296 | 36 out of 156              |



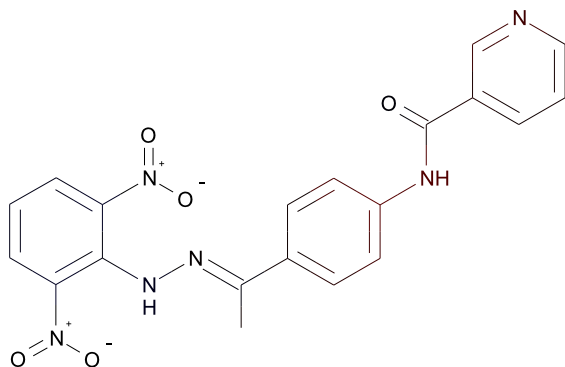
 $C_{20}H_{16}N_6O_5$ 

Molecular Weight: 420.37824

ALogP: 2.852

Rotatable Bonds: 7

Acceptors: 8

Donors: 2

## Model Prediction

Prediction: Carcinogen

Probability: 0.314

Enrichment: 0.976

Bayesian Score: 0.748

Mahalanobis Distance: 12.3

Mahalanobis Distance p-value: 0.00179

Prediction: Positive if the Bayesian score is above the estimated best cutoff value from minimizing the false positive and false negative rate.

Probability: The estimated probability that the sample is in the positive category. This assumes that the Bayesian score follows a normal distribution and is different from the prediction using a cutoff.

Enrichment: An estimate of enrichment, that is, the increased likelihood (versus random) of this sample being in the category.

Bayesian Score: The standard Laplacian-modified Bayesian score.

Mahalanobis Distance: The Mahalanobis distance (MD) is the distance to the center of the training data. The larger the MD, the less trustworthy the prediction.

Mahalanobis Distance p-value: The p-value gives the fraction of training data with an MD greater than or equal to the one for the given sample, assuming normally distributed data. The smaller the p-value, the less trustworthy the prediction. For highly non-normal X properties (e.g., fingerprints), the MD p-value is wildly inaccurate.

## Structural Similar Compounds

| Name               | Sulfasalazine                                                       | Nedocromil                                                          | Carbenicillin                                                       |
|--------------------|---------------------------------------------------------------------|---------------------------------------------------------------------|---------------------------------------------------------------------|
| Structure          |                                                                     |                                                                     |                                                                     |
| Actual Endpoint    | Non-Carcinogen                                                      | Non-Carcinogen                                                      | Non-Carcinogen                                                      |
| Predicted Endpoint | Non-Carcinogen                                                      | Non-Carcinogen                                                      | Non-Carcinogen                                                      |
| Distance           | 0.641                                                               | 0.643                                                               | 0.683                                                               |
| Reference          | US FDA (Centre for Drug Eval.& Res./Off. Testing & Res.) Sept. 1997 | US FDA (Centre for Drug Eval.& Res./Off. Testing & Res.) Sept. 1997 | US FDA (Centre for Drug Eval.& Res./Off. Testing & Res.) Sept. 1997 |

## Model Applicability

Unknown features are fingerprint features in the query molecule, but not found or appearing too infrequently in the training set.

1. All properties and OPS components are within expected ranges.
2. Unknown ECFP\_2 feature: 1043790491: [\*][N+](=[\*])[\*]
3. Unknown ECFP\_2 feature: 781519895: [\*][O-]
4. Unknown ECFP\_2 feature: 128986386: [\*]N=C(/C)\[c](:[\*]):[\*]
5. Unknown ECFP\_2 feature: -1236714312: [\*]=NN[c](:[\*]):[\*]
6. Unknown ECFP\_2 feature: -1956535100: [\*][c](:[\*]):[c]([N+](=[\*])[\*]):c:[\*]
7. Unknown ECFP\_2 feature: -215026467: [\*]:[c](:[\*])[N+](=O)[O-]
8. Unknown ECFP\_2 feature: 2104376220: [\*][N+](=O)[\*]
9. Unknown ECFP\_2 feature: -659271057: [\*][N+](=[\*])[O-]

## Feature Contribution

### Top features for positive contribution

| Fingerprint | Bit/Smiles | Feature Structure | Score | Carcinogen in training set |
|-------------|------------|-------------------|-------|----------------------------|
|-------------|------------|-------------------|-------|----------------------------|



|                                        |             |                                                                                                                                            |        |                            |
|----------------------------------------|-------------|--------------------------------------------------------------------------------------------------------------------------------------------|--------|----------------------------|
| ECFP_12                                | -177077903  | 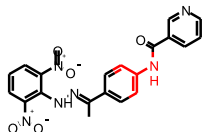<br><chem>[*]N[c](:[cH]:[*]):[cH]:[*]</chem>            | 0.529  | 6 out of 10                |
| ECFP_12                                | -1236483485 | <br><chem>[*]C(=[*])N[c](:[*]):[*]</chem>               | 0.46   | 9 out of 17                |
| ECFP_12                                | 888054369   | <br><chem>[*]N[c]1:[cH]:[*]:[c]([*]):[cH]:[cH]:1</chem> | 0.454  | 5 out of 9                 |
| Top Features for negative contribution |             |                                                                                                                                            |        |                            |
| Fingerprint                            | Bit/Smiles  | Feature Structure                                                                                                                          | Score  | Carcinogen in training set |
| ECFP_12                                | 2007300961  | <br><chem>[*][c]1:[*]:[c]([*]):[cH]:[cH]:[cH]:1</chem> | -0.426 | 7 out of 36                |
| ECFP_12                                | 1997021792  | <br><chem>[*]:[cH]:[cH]:[cH]:[*]</chem>               | -0.296 | 36 out of 156              |



|         |           |                                                                                                                     |        |            |
|---------|-----------|---------------------------------------------------------------------------------------------------------------------|--------|------------|
| ECFP_12 | 560380707 | 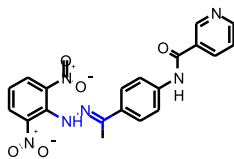<br><chem>[*]NN=C([*])[*]</chem> | -0.272 | 0 out of 1 |
|---------|-----------|---------------------------------------------------------------------------------------------------------------------|--------|------------|



# Sorafenib

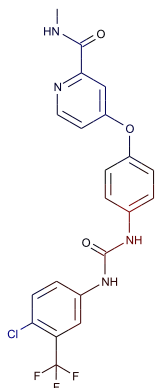

$C_{21}H_{16}ClF_3N_4O_3$

Molecular Weight: 464.82494

ALogP: 4.175

Rotatable Bonds: 6

Acceptors: 4

Donors: 3

## Model Prediction

Prediction: Non-Carcinogen

Probability: 0.236

Enrichment: 0.734

Bayesian Score: -3.76

Mahalanobis Distance: 12.2

Mahalanobis Distance p-value: 0.00229

Prediction: Positive if the Bayesian score is above the estimated best cutoff value from minimizing the false positive and false negative rate.

Probability: The estimated probability that the sample is in the positive category. This assumes that the Bayesian score follows a normal distribution and is different from the prediction using a cutoff.

Enrichment: An estimate of enrichment, that is, the increased likelihood (versus random) of this sample being in the category.

Bayesian Score: The standard Laplacian-modified Bayesian score.

Mahalanobis Distance: The Mahalanobis distance (MD) is the distance to the center of the training data. The larger the MD, the less trustworthy the prediction.

Mahalanobis Distance p-value: The p-value gives the fraction of training data with an MD greater than or equal to the one for the given sample, assuming normally distributed data. The smaller the p-value, the less trustworthy the prediction. For highly non-normal X properties (e.g., fingerprints), the MD p-value is wildly inaccurate.

# TOPKAT\_Rat\_Female\_FDA\_None\_vs\_Carcinogen

## Structural Similar Compounds

| Name               | Glimepiride                                                         | Glyburide                                                           | Fluvastatin                                                         |
|--------------------|---------------------------------------------------------------------|---------------------------------------------------------------------|---------------------------------------------------------------------|
| Structure          |                                                                     |                                                                     |                                                                     |
| Actual Endpoint    | Non-Carcinogen                                                      | Non-Carcinogen                                                      | Non-Carcinogen                                                      |
| Predicted Endpoint | Non-Carcinogen                                                      | Non-Carcinogen                                                      | Non-Carcinogen                                                      |
| Distance           | 0.620                                                               | 0.635                                                               | 0.635                                                               |
| Reference          | US FDA (Centre for Drug Eval.& Res./Off. Testing & Res.) Sept. 1997 | US FDA (Centre for Drug Eval.& Res./Off. Testing & Res.) Sept. 1997 | US FDA (Centre for Drug Eval.& Res./Off. Testing & Res.) Sept. 1997 |

## Model Applicability

Unknown features are fingerprint features in the query molecule, but not found or appearing too infrequently in the training set.

1. All properties and OPS components are within expected ranges.

## Feature Contribution

### Top features for positive contribution

| Fingerprint | Bit/Smiles | Feature Structure                                        | Score | Carcinogen in training set |
|-------------|------------|----------------------------------------------------------|-------|----------------------------|
| ECFP_12     | -970385855 | <br>[*]N[c]1:[cH]:[*]:[c]([*]):[c]([cH]:1)C([*])([*])[*] | 0.613 | 2 out of 2                 |



| ECFP_12                                | -177077903  | 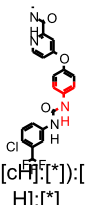<br><chem>[*]N[c](:[cH]:[*]):[cH]:[*]</chem>      | 0.529  | 6 out of 10                |
|----------------------------------------|-------------|--------------------------------------------------------------------------------------------------------------------------------------|--------|----------------------------|
| ECFP_12                                | -1236483485 | <br><chem>[*]C(=[*])N[c](:[*]):[*]</chem>         | 0.46   | 9 out of 17                |
| Top Features for negative contribution |             |                                                                                                                                      |        |                            |
| Fingerprint                            | Bit/Smiles  | Feature Structure                                                                                                                    | Score  | Carcinogen in training set |
| ECFP_12                                | 1335691903  | <br><chem>[*][c](:[*]):[c]([Cl]):[cH]:[*]</chem>  | -1.11  | 2 out of 26                |
| ECFP_12                                | 99947387    | <br><chem>[*]:[c](:[*])Cl</chem>                 | -0.817 | 8 out of 62                |
| ECFP_12                                | 1413420509  | <br><chem>[*]C(=[*])[c](:[cH]:[*]):n:[*]</chem> | -0.661 | 0 out of 3                 |



7a

## TOPKAT\_Rat\_Female\_FDA\_Single\_vs\_Multiple

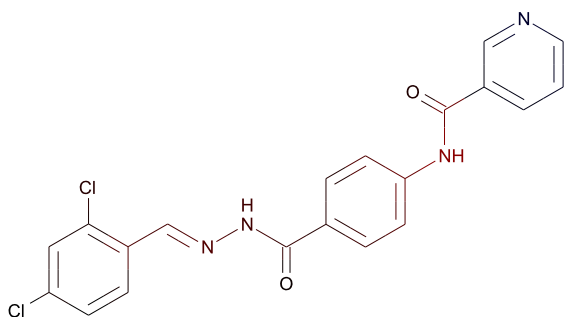C<sub>20</sub>H<sub>14</sub>Cl<sub>2</sub>N<sub>4</sub>O<sub>2</sub>

Molecular Weight: 413.25676

ALogP: 3.646

Rotatable Bonds: 5

Acceptors: 4

Donors: 2

**Model Prediction****Prediction: Multiple-Carcinogen**

Probability: 0.706

Enrichment: 1.89

Bayesian Score: 5.65

Mahalanobis Distance: 12.5

Mahalanobis Distance p-value: 0.000613

Prediction: Positive if the Bayesian score is above the estimated best cutoff value from minimizing the false positive and false negative rate.

Probability: The estimated probability that the sample is in the positive category. This assumes that the Bayesian score follows a normal distribution and is different from the prediction using a cutoff.

Enrichment: An estimate of enrichment, that is, the increased likelihood (versus random) of this sample being in the category.

Bayesian Score: The standard Laplacian-modified Bayesian score.

Mahalanobis Distance: The Mahalanobis distance (MD) is the distance to the center of the training data. The larger the MD, the less trustworthy the prediction.

Mahalanobis Distance p-value: The p-value gives the fraction of training data with an MD greater than or equal to the one for the given sample, assuming normally distributed data. The smaller the p-value, the less trustworthy the prediction. For highly non-normal X properties (e.g., fingerprints), the MD p-value is wildly inaccurate.

**Structural Similar Compounds**

| Name               | Doxefazepam                                                         | Bicalutamide                                                        | Lansoprazole                                                        |
|--------------------|---------------------------------------------------------------------|---------------------------------------------------------------------|---------------------------------------------------------------------|
| Structure          |                                                                     |                                                                     |                                                                     |
| Actual Endpoint    | Multiple-Carcinogen                                                 | Multiple-Carcinogen                                                 | Single-Carcinogen                                                   |
| Predicted Endpoint | Multiple-Carcinogen                                                 | Multiple-Carcinogen                                                 | Single-Carcinogen                                                   |
| Distance           | 0.564                                                               | 0.595                                                               | 0.659                                                               |
| Reference          | US FDA (Centre for Drug Eval.& Res./Off. Testing & Res.) Sept. 1997 | US FDA (Centre for Drug Eval.& Res./Off. Testing & Res.) Sept. 1997 | US FDA (Centre for Drug Eval.& Res./Off. Testing & Res.) Sept. 1997 |

**Model Applicability**

Unknown features are fingerprint features in the query molecule, but not found or appearing too infrequently in the training set.

1. All properties and OPS components are within expected ranges.

**Feature Contribution****Top features for positive contribution**

| Fingerprint | Bit/Smiles | Feature Structure               | Score | Multiple-Carcinogen in training set |
|-------------|------------|---------------------------------|-------|-------------------------------------|
| SCFP_4      | 1631845520 | <br>[*]C(=[*])N[c]([*]):<br>[*] | 0.601 | 6 out of 9                          |



|                                        |             |                                                                                                                                   |        |                                     |
|----------------------------------------|-------------|-----------------------------------------------------------------------------------------------------------------------------------|--------|-------------------------------------|
| SCFP_4                                 | -1375926917 | 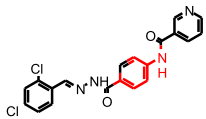<br>[*]N[c]1:[cH]:[*]:[c]<br>([*]):[cH]:[cH]:1 | 0.522  | 6 out of 10                         |
| SCFP_4                                 | 1205586762  | <br>[*]N[c](:[cH]:[*]):[c]<br>H]:[*]           | 0.451  | 7 out of 13                         |
| Top Features for negative contribution |             |                                                                                                                                   |        |                                     |
| Fingerprint                            | Bit/Smiles  | Feature Structure                                                                                                                 | Score  | Multiple-Carcinogen in training set |
| SCFP_4                                 | 1188429584  | <br>[*][c]1:[*]:[cH]:[cH]<br>:n:[cH]:1         | -0.666 | 0 out of 3                          |
| SCFP_4                                 | -758850909  | <br>[*][c]1:[*]:n:[cH]:[c]<br>H]:[cH]:1      | -0.489 | 0 out of 2                          |
| SCFP_4                                 | -937094999  | <br>[*]1:[cH]:[cH]:[cH]:n<br>:[cH]:1         | -0.368 | 1 out of 6                          |







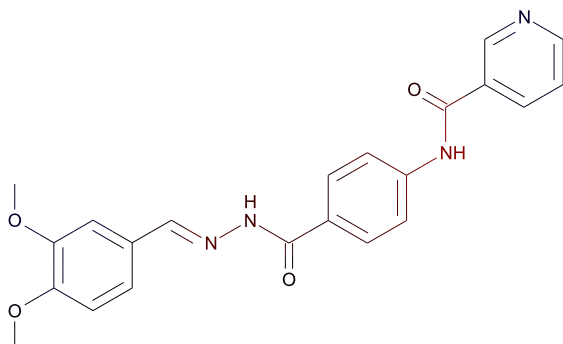

$C_{22}H_{20}N_4O_4$

Molecular Weight: 404.4186

ALogP: 2.284

Rotatable Bonds: 7

Acceptors: 6

Donors: 2

## Model Prediction

**Prediction: Multiple-Carcinogen**

Probability: 0.579

Enrichment: 1.55

Bayesian Score: 2.77

Mahalanobis Distance: 19.3

Mahalanobis Distance p-value: 2.43e-010

Prediction: Positive if the Bayesian score is above the estimated best cutoff value from minimizing the false positive and false negative rate.

Probability: The estimated probability that the sample is in the positive category. This assumes that the Bayesian score follows a normal distribution and is different from the prediction using a cutoff.

Enrichment: An estimate of enrichment, that is, the increased likelihood (versus random) of this sample being in the category.

Bayesian Score: The standard Laplacian-modified Bayesian score.

Mahalanobis Distance: The Mahalanobis distance (MD) is the distance to the center of the training data. The larger the MD, the less trustworthy the prediction.

Mahalanobis Distance p-value: The p-value gives the fraction of training data with an MD greater than or equal to the one for the given sample, assuming normally distributed data. The smaller the p-value, the less trustworthy the prediction. For highly non-normal X properties (e.g., fingerprints), the MD p-value is wildly inaccurate.

## Structural Similar Compounds

| Name               | Bicalutamide                                                        | Moricizine                                                          | Omeprazole                                                          |
|--------------------|---------------------------------------------------------------------|---------------------------------------------------------------------|---------------------------------------------------------------------|
| Structure          |                                                                     |                                                                     |                                                                     |
| Actual Endpoint    | Multiple-Carcinogen                                                 | Single-Carcinogen                                                   | Multiple-Carcinogen                                                 |
| Predicted Endpoint | Multiple-Carcinogen                                                 | Single-Carcinogen                                                   | Multiple-Carcinogen                                                 |
| Distance           | 0.568                                                               | 0.626                                                               | 0.665                                                               |
| Reference          | US FDA (Centre for Drug Eval.& Res./Off. Testing & Res.) Sept. 1997 | US FDA (Centre for Drug Eval.& Res./Off. Testing & Res.) Sept. 1997 | US FDA (Centre for Drug Eval.& Res./Off. Testing & Res.) Sept. 1997 |

## Model Applicability

Unknown features are fingerprint features in the query molecule, but not found or appearing too infrequently in the training set.

1. All properties and OPS components are within expected ranges.

## Feature Contribution

### Top features for positive contribution

| Fingerprint | Bit/Smiles | Feature Structure               | Score | Multiple-Carcinogen in training set |
|-------------|------------|---------------------------------|-------|-------------------------------------|
| SCFP_4      | 1631845520 | <br>[*]C(=[*])N[c]([*]):<br>[*] | 0.601 | 6 out of 9                          |



|                                        |             |                                                                                                                                              |        |                                     |
|----------------------------------------|-------------|----------------------------------------------------------------------------------------------------------------------------------------------|--------|-------------------------------------|
| SCFP_4                                 | -1375926917 | 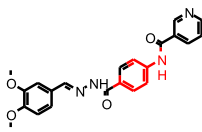<br>[*]N[c]1:[cH]:[*]:[c]<br>([*]):[cH]:[cH]:1            | 0.522  | 6 out of 10                         |
| SCFP_4                                 | 1205586762  | <br>[*]N[c](:[cH]:[*]):[c]<br>H]:[*]                      | 0.451  | 7 out of 13                         |
| Top Features for negative contribution |             |                                                                                                                                              |        |                                     |
| Fingerprint                            | Bit/Smiles  | Feature Structure                                                                                                                            | Score  | Multiple-Carcinogen in training set |
| SCFP_4                                 | 1188429584  | <br>[*][c]1:[*]:[cH]:[cH]<br>:n:[cH]:1                    | -0.666 | 0 out of 3                          |
| SCFP_4                                 | -758850909  | <br>[*][c]1:[*]:n:[cH]:[c]<br>H]:[cH]:1                 | -0.489 | 0 out of 2                          |
| SCFP_4                                 | 392579710   | <br>[*]O[c]1:[cH]:[c](C=[<br>*]):[cH]:[*]:[c]:1[*]<br>] | -0.489 | 0 out of 2                          |







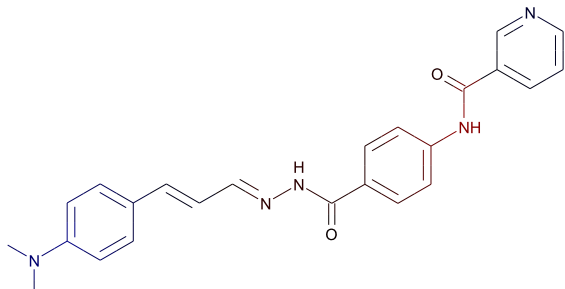

$C_{24}H_{23}N_5O_2$

Molecular Weight: 413.47172

ALogP: 2.839

Rotatable Bonds: 7

Acceptors: 5

Donors: 2

## Model Prediction

**Prediction: Multiple-Carcinogen**

Probability: 0.532

Enrichment: 1.42

Bayesian Score: 1.52

Mahalanobis Distance: 14.2

Mahalanobis Distance p-value: 1.84e-005

Prediction: Positive if the Bayesian score is above the estimated best cutoff value from minimizing the false positive and false negative rate.

Probability: The estimated probability that the sample is in the positive category. This assumes that the Bayesian score follows a normal distribution and is different from the prediction using a cutoff.

Enrichment: An estimate of enrichment, that is, the increased likelihood (versus random) of this sample being in the category.

Bayesian Score: The standard Laplacian-modified Bayesian score.

Mahalanobis Distance: The Mahalanobis distance (MD) is the distance to the center of the training data. The larger the MD, the less trustworthy the prediction.

Mahalanobis Distance p-value: The p-value gives the fraction of training data with an MD greater than or equal to the one for the given sample, assuming normally distributed data. The smaller the p-value, the less trustworthy the prediction. For highly non-normal X properties (e.g., fingerprints), the MD p-value is wildly inaccurate.

## Structural Similar Compounds

| Name               | Bicalutamide                                                        | Moricizine                                                          | Lansoprazole                                                        |
|--------------------|---------------------------------------------------------------------|---------------------------------------------------------------------|---------------------------------------------------------------------|
| Structure          |                                                                     |                                                                     |                                                                     |
| Actual Endpoint    | Multiple-Carcinogen                                                 | Single-Carcinogen                                                   | Single-Carcinogen                                                   |
| Predicted Endpoint | Multiple-Carcinogen                                                 | Single-Carcinogen                                                   | Single-Carcinogen                                                   |
| Distance           | 0.556                                                               | 0.649                                                               | 0.688                                                               |
| Reference          | US FDA (Centre for Drug Eval.& Res./Off. Testing & Res.) Sept. 1997 | US FDA (Centre for Drug Eval.& Res./Off. Testing & Res.) Sept. 1997 | US FDA (Centre for Drug Eval.& Res./Off. Testing & Res.) Sept. 1997 |

## Model Applicability

Unknown features are fingerprint features in the query molecule, but not found or appearing too infrequently in the training set.

- OPS PC16 out of range. Value: 2.8516. Training min, max, SD, explained variance: -2.5301, 2.7699, 1.075, 0.0171.

## Feature Contribution

| Top features for positive contribution |            |                                                  |       |                                     |
|----------------------------------------|------------|--------------------------------------------------|-------|-------------------------------------|
| Fingerprint                            | Bit/Smiles | Feature Structure                                | Score | Multiple-Carcinogen in training set |
| SCFP_4                                 | 1631845520 | <p><chem>[*]C(=[*])N[c]([*]):</chem><br/>[*]</p> | 0.601 | 6 out of 9                          |



|                                        |             |                                                                                                                                   |        |                                     |
|----------------------------------------|-------------|-----------------------------------------------------------------------------------------------------------------------------------|--------|-------------------------------------|
| SCFP_4                                 | -1375926917 | 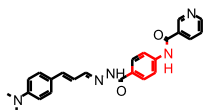<br>[*]N[c]1:[cH]:[*]:[c]<br>([*]):[cH]:[cH]:1 | 0.522  | 6 out of 10                         |
| SCFP_4                                 | 1205586762  | <br>[*]N[c](:[cH]:[*]):[c]<br>H]:[*]           | 0.451  | 7 out of 13                         |
| Top Features for negative contribution |             |                                                                                                                                   |        |                                     |
| Fingerprint                            | Bit/Smiles  | Feature Structure                                                                                                                 | Score  | Multiple-Carcinogen in training set |
| SCFP_4                                 | -299436502  | <br>CN(C)[c]1:[cH]:[cH]:[<br>*]:[cH]:[cH]:1    | -0.946 | 0 out of 5                          |
| SCFP_4                                 | 1188429584  | <br>[*][c]1:[*]:[cH]:[cH]<br>:n:[cH]:1       | -0.666 | 0 out of 3                          |
| SCFP_4                                 | -1853624961 | <br>[*]:[c](:[*])N(C)C                       | -0.651 | 1 out of 9                          |







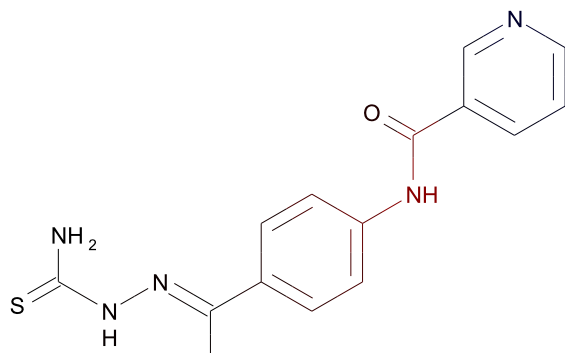C<sub>15</sub>H<sub>15</sub>N<sub>5</sub>OS

Molecular Weight: 313.3775

ALogP: 1.414

Rotatable Bonds: 5

Acceptors: 4

Donors: 3

## Model Prediction

**Prediction: Multiple-Carcinogen**

Probability: 0.567

Enrichment: 1.52

Bayesian Score: 2.52

Mahalanobis Distance: 13.4

Mahalanobis Distance p-value: 9.86e-005

Prediction: Positive if the Bayesian score is above the estimated best cutoff value from minimizing the false positive and false negative rate.

Probability: The estimated probability that the sample is in the positive category. This assumes that the Bayesian score follows a normal distribution and is different from the prediction using a cutoff.

Enrichment: An estimate of enrichment, that is, the increased likelihood (versus random) of this sample being in the category.

Bayesian Score: The standard Laplacian-modified Bayesian score.

Mahalanobis Distance: The Mahalanobis distance (MD) is the distance to the center of the training data. The larger the MD, the less trustworthy the prediction.

Mahalanobis Distance p-value: The p-value gives the fraction of training data with an MD greater than or equal to the one for the given sample, assuming normally distributed data. The smaller the p-value, the less trustworthy the prediction. For highly non-normal X properties (e.g., fingerprints), the MD p-value is wildly inaccurate.

## Structural Similar Compounds

| Name               | Torsemide                                                           | Sulfamethazine                                                      | Atenolol                                                            |
|--------------------|---------------------------------------------------------------------|---------------------------------------------------------------------|---------------------------------------------------------------------|
| Structure          |                                                                     |                                                                     |                                                                     |
| Actual Endpoint    | Single-Carcinogen                                                   | Single-Carcinogen                                                   | Multiple-Carcinogen                                                 |
| Predicted Endpoint | Single-Carcinogen                                                   | Single-Carcinogen                                                   | Multiple-Carcinogen                                                 |
| Distance           | 0.665                                                               | 0.682                                                               | 0.689                                                               |
| Reference          | US FDA (Centre for Drug Eval.& Res./Off. Testing & Res.) Sept. 1997 | US FDA (Centre for Drug Eval.& Res./Off. Testing & Res.) Sept. 1997 | US FDA (Centre for Drug Eval.& Res./Off. Testing & Res.) Sept. 1997 |

## Model Applicability

Unknown features are fingerprint features in the query molecule, but not found or appearing too infrequently in the training set.

1. All properties and OPS components are within expected ranges.

## Feature Contribution

### Top features for positive contribution

| Fingerprint | Bit/Smiles | Feature Structure                                         | Score | Multiple-Carcinogen in training set |
|-------------|------------|-----------------------------------------------------------|-------|-------------------------------------|
| SCFP_4      | 1631845520 | <br><chem>[*]C(=[*])N[c]([*]):</chem><br><chem>[*]</chem> | 0.601 | 6 out of 9                          |



|                                        |             |                                                                                                                                            |        |                                     |
|----------------------------------------|-------------|--------------------------------------------------------------------------------------------------------------------------------------------|--------|-------------------------------------|
| SCFP_4                                 | -1375926917 | 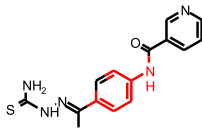<br><chem>[*]N[c]1:[cH]:[*]:[c]([*]):[cH]:[cH]:1</chem> | 0.522  | 6 out of 10                         |
| SCFP_4                                 | 1205586762  | <br><chem>[*]N[c](:[cH]:[*]):[cH]:[*]</chem>            | 0.451  | 7 out of 13                         |
| Top Features for negative contribution |             |                                                                                                                                            |        |                                     |
| Fingerprint                            | Bit/Smiles  | Feature Structure                                                                                                                          | Score  | Multiple-Carcinogen in training set |
| SCFP_4                                 | 1188429584  | <br><chem>[*][c]1:[*]:[cH]:[cH]:n:[cH]:1</chem>         | -0.666 | 0 out of 3                          |
| SCFP_4                                 | -758850909  | <br><chem>[*][c]1:[*]:n:[cH]:[cH]:[cH]:1</chem>       | -0.489 | 0 out of 2                          |
| SCFP_4                                 | -937094999  | <br><chem>[*]1:[cH]:[cH]:[cH]:n:[cH]:1</chem>         | -0.368 | 1 out of 6                          |







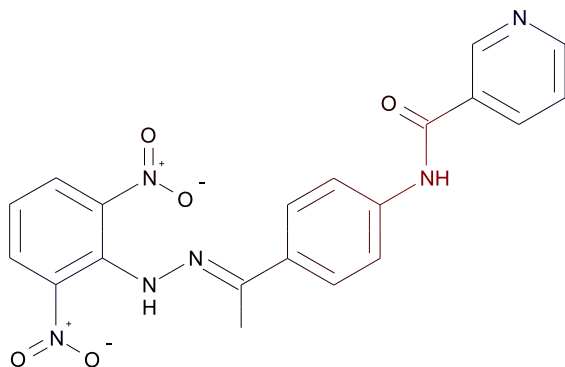

$C_{20}H_{16}N_6O_5$

Molecular Weight: 420.37824

ALogP: 2.852

Rotatable Bonds: 7

Acceptors: 8

Donors: 2

## Model Prediction

**Prediction: Multiple-Carcinogen**

Probability: 0.561

Enrichment: 1.5

Bayesian Score: 2.38

Mahalanobis Distance: 22.2

Mahalanobis Distance p-value: 5.66e-013

Prediction: Positive if the Bayesian score is above the estimated best cutoff value from minimizing the false positive and false negative rate.

Probability: The estimated probability that the sample is in the positive category. This assumes that the Bayesian score follows a normal distribution and is different from the prediction using a cutoff.

Enrichment: An estimate of enrichment, that is, the increased likelihood (versus random) of this sample being in the category.

Bayesian Score: The standard Laplacian-modified Bayesian score.

Mahalanobis Distance: The Mahalanobis distance (MD) is the distance to the center of the training data. The larger the MD, the less trustworthy the prediction.

Mahalanobis Distance p-value: The p-value gives the fraction of training data with an MD greater than or equal to the one for the given sample, assuming normally distributed data. The smaller the p-value, the less trustworthy the prediction. For highly non-normal X properties (e.g., fingerprints), the MD p-value is wildly inaccurate.

## Structural Similar Compounds

| Name               | Timolol                                                             | Moricizine                                                          | Lasiocarpine                                                        |
|--------------------|---------------------------------------------------------------------|---------------------------------------------------------------------|---------------------------------------------------------------------|
| Structure          |                                                                     |                                                                     |                                                                     |
| Actual Endpoint    | Single-Carcinogen                                                   | Single-Carcinogen                                                   | Single-Carcinogen                                                   |
| Predicted Endpoint | Single-Carcinogen                                                   | Single-Carcinogen                                                   | Single-Carcinogen                                                   |
| Distance           | 0.746                                                               | 0.752                                                               | 0.757                                                               |
| Reference          | US FDA (Centre for Drug Eval.& Res./Off. Testing & Res.) Sept. 1997 | US FDA (Centre for Drug Eval.& Res./Off. Testing & Res.) Sept. 1997 | US FDA (Centre for Drug Eval.& Res./Off. Testing & Res.) Sept. 1997 |

## Model Applicability

Unknown features are fingerprint features in the query molecule, but not found or appearing too infrequently in the training set.

1. All properties and OPS components are within expected ranges.

## Feature Contribution

### Top features for positive contribution

| Fingerprint | Bit/Smiles | Feature Structure                                         | Score | Multiple-Carcinogen in training set |
|-------------|------------|-----------------------------------------------------------|-------|-------------------------------------|
| SCFP_4      | 1631845520 | <br><chem>[*]C(=[*])N[c]([*]):</chem><br><chem>[*]</chem> | 0.601 | 6 out of 9                          |



|                                        |             |                                                                                                                                                   |        |                                     |
|----------------------------------------|-------------|---------------------------------------------------------------------------------------------------------------------------------------------------|--------|-------------------------------------|
| SCFP_4                                 | -1375926917 | 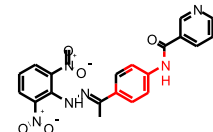<br><chem>[*]N[c]1:[cH]:[*]:[c]([*]):[cH]:[cH]:1</chem>        | 0.522  | 6 out of 10                         |
| SCFP_4                                 | 1311339974  | <br><chem>[*][N+](=O)[*]</chem>                                | 0.504  | 9 out of 16                         |
| Top Features for negative contribution |             |                                                                                                                                                   |        |                                     |
| Fingerprint                            | Bit/Smiles  | Feature Structure                                                                                                                                 | Score  | Multiple-Carcinogen in training set |
| SCFP_4                                 | 1188429584  | <br><chem>[*][c]1:[*]:[cH]:[cH]:n:[cH]:1</chem>                | -0.666 | 0 out of 3                          |
| SCFP_4                                 | -758850909  | <br><chem>[*][c]1:[*]:n:[cH]:[cH]:[cH]:1</chem>              | -0.489 | 0 out of 2                          |
| SCFP_4                                 | -1380909229 | <br><chem>[*]N([*])[c]1:[cH]:[*]:[c]([*]):[cH]:[cH]:1</chem> | -0.413 | 3 out of 16                         |







7a

TOPKAT\_Rat\_Male\_FDA\_None\_vs\_Carcinogen

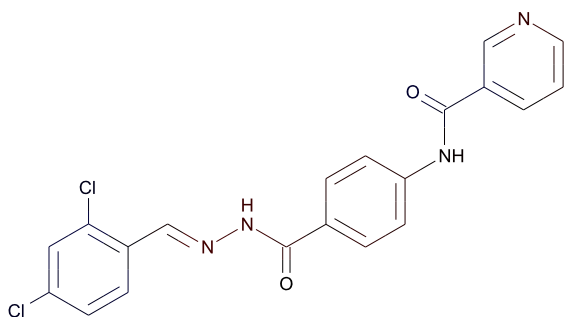C<sub>20</sub>H<sub>14</sub>Cl<sub>2</sub>N<sub>4</sub>O<sub>2</sub>

Molecular Weight: 413.25676

ALogP: 3.646

Rotatable Bonds: 5

Acceptors: 4

Donors: 2

## Model Prediction

Prediction: Carcinogen

Probability: 0.38

Enrichment: 1.14

Bayesian Score: 0.793

Mahalanobis Distance: 13.1

Mahalanobis Distance p-value: 0.00126

Prediction: Positive if the Bayesian score is above the estimated best cutoff value from minimizing the false positive and false negative rate.

Probability: The estimated probability that the sample is in the positive category. This assumes that the Bayesian score follows a normal distribution and is different from the prediction using a cutoff.

Enrichment: An estimate of enrichment, that is, the increased likelihood (versus random) of this sample being in the category.

Bayesian Score: The standard Laplacian-modified Bayesian score.

Mahalanobis Distance: The Mahalanobis distance (MD) is the distance to the center of the training data. The larger the MD, the less trustworthy the prediction.

Mahalanobis Distance p-value: The p-value gives the fraction of training data with an MD greater than or equal to the one for the given sample, assuming normally distributed data. The smaller the p-value, the less trustworthy the prediction. For highly non-normal X properties (e.g., fingerprints), the MD p-value is wildly inaccurate.

## Structural Similar Compounds

| Name               | Doxefazepam                                                         | Bicalutamide                                                        | Indomethacin                                                        |
|--------------------|---------------------------------------------------------------------|---------------------------------------------------------------------|---------------------------------------------------------------------|
| Structure          |                                                                     |                                                                     |                                                                     |
| Actual Endpoint    | Carcinogen                                                          | Carcinogen                                                          | Non-Carcinogen                                                      |
| Predicted Endpoint | Carcinogen                                                          | Carcinogen                                                          | Non-Carcinogen                                                      |
| Distance           | 0.611                                                               | 0.611                                                               | 0.622                                                               |
| Reference          | US FDA (Centre for Drug Eval.& Res./Off. Testing & Res.) Sept. 1997 | US FDA (Centre for Drug Eval.& Res./Off. Testing & Res.) Sept. 1997 | US FDA (Centre for Drug Eval.& Res./Off. Testing & Res.) Sept. 1997 |

## Model Applicability

Unknown features are fingerprint features in the query molecule, but not found or appearing too infrequently in the training set.

- OPS PC1 out of range. Value: -5.8741. Training min, max, SD, explained variance: -5.694, 8.348, 2.949, 0.0811.

## Feature Contribution

| Top features for positive contribution |            |                                                       |       |                            |
|----------------------------------------|------------|-------------------------------------------------------|-------|----------------------------|
| Fingerprint                            | Bit/Smiles | Feature Structure                                     | Score | Carcinogen in training set |
| SCFP_6                                 | -347048986 | <p>[*]C(=[*])N[c]1:[cH]:<br/>[cH]:[*]:[cH]:[cH]:1</p> | 0.615 | 5 out of 7                 |



| SCFP_6                                 | 1926385222 | 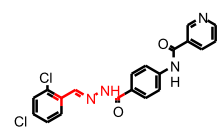<br><chem>[*]C(=[*])NN=C(c)([*]):[*]</chem>                | 0.415  | 1 out of 1                 |
|----------------------------------------|------------|-----------------------------------------------------------------------------------------------------------------------------------------------|--------|----------------------------|
| SCFP_6                                 | 698322229  | <br><chem>[*]C(=[*])NN=[*]</chem>                          | 0.415  | 1 out of 1                 |
| Top Features for negative contribution |            |                                                                                                                                               |        |                            |
| Fingerprint                            | Bit/Smiles | Feature Structure                                                                                                                             | Score  | Carcinogen in training set |
| SCFP_6                                 | 1915307678 | <br><chem>[*][c]1:[cH]:[c](Cl):[cH]:[cH]:[c]:1C=[*]</chem> | -0.496 | 0 out of 2                 |
| SCFP_6                                 | 1257084377 | <br><chem>[*]NC(=O)[c](:[*]):[*]</chem>                   | -0.436 | 4 out of 21                |
| SCFP_6                                 | -52074512  | <br><chem>[*]:[c](:[*])Cl</chem>                         | -0.315 | 14 out of 61               |



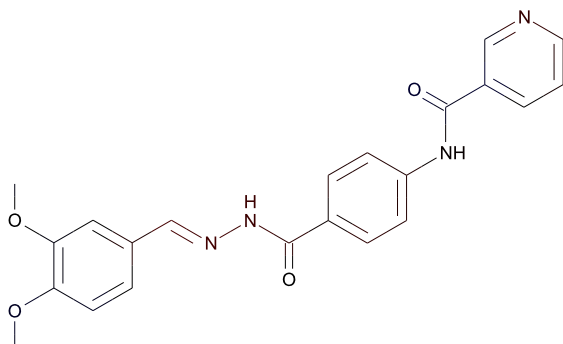C<sub>22</sub>H<sub>20</sub>N<sub>4</sub>O<sub>4</sub>

Molecular Weight: 404.4186

ALogP: 2.284

Rotatable Bonds: 7

Acceptors: 6

Donors: 2

## Model Prediction

**Prediction: Carcinogen**

Probability: 0.374

Enrichment: 1.12

Bayesian Score: 0.587

Mahalanobis Distance: 15

Mahalanobis Distance p-value: 5.58e-007

Prediction: Positive if the Bayesian score is above the estimated best cutoff value from minimizing the false positive and false negative rate.

Probability: The estimated probability that the sample is in the positive category. This assumes that the Bayesian score follows a normal distribution and is different from the prediction using a cutoff.

Enrichment: An estimate of enrichment, that is, the increased likelihood (versus random) of this sample being in the category.

Bayesian Score: The standard Laplacian-modified Bayesian score.

Mahalanobis Distance: The Mahalanobis distance (MD) is the distance to the center of the training data. The larger the MD, the less trustworthy the prediction.

Mahalanobis Distance p-value: The p-value gives the fraction of training data with an MD greater than or equal to the one for the given sample, assuming normally distributed data. The smaller the p-value, the less trustworthy the prediction. For highly non-normal X properties (e.g., fingerprints), the MD p-value is wildly inaccurate.

## Structural Similar Compounds

| Name               | Bicalutamide                                                        | Moricizine                                                          | Cisapride                                                           |
|--------------------|---------------------------------------------------------------------|---------------------------------------------------------------------|---------------------------------------------------------------------|
| Structure          |                                                                     |                                                                     |                                                                     |
| Actual Endpoint    | Carcinogen                                                          | Carcinogen                                                          | Non-Carcinogen                                                      |
| Predicted Endpoint | Carcinogen                                                          | Carcinogen                                                          | Non-Carcinogen                                                      |
| Distance           | 0.586                                                               | 0.624                                                               | 0.627                                                               |
| Reference          | US FDA (Centre for Drug Eval.& Res./Off. Testing & Res.) Sept. 1997 | US FDA (Centre for Drug Eval.& Res./Off. Testing & Res.) Sept. 1997 | US FDA (Centre for Drug Eval.& Res./Off. Testing & Res.) Sept. 1997 |

## Model Applicability

Unknown features are fingerprint features in the query molecule, but not found or appearing too infrequently in the training set.

1. All properties and OPS components are within expected ranges.

## Feature Contribution

### Top features for positive contribution

| Fingerprint | Bit/Smiles | Feature Structure                             | Score | Carcinogen in training set |
|-------------|------------|-----------------------------------------------|-------|----------------------------|
| SCFP_6      | -347048986 | <br>[*]C(=[*])N[c]1:[cH]:[cH]:[*]:[cH]:[cH]:1 | 0.615 | 5 out of 7                 |



|                                        |             |                                                                                                                                                  |        |                            |
|----------------------------------------|-------------|--------------------------------------------------------------------------------------------------------------------------------------------------|--------|----------------------------|
| SCFP_6                                 | 392579710   | 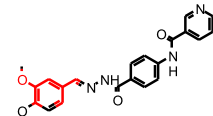<br><chem>[*]O[c]1:[cH]:[c](C=[*]):[cH]:[*]:[c]:1[*]</chem>   | 0.425  | 2 out of 3                 |
| SCFP_6                                 | -105808146  | <br><chem>[*][c]1:[cH]:[cH]:[cH]:[cH]:n:[cH]:1</chem>         | 0.415  | 1 out of 1                 |
| Top Features for negative contribution |             |                                                                                                                                                  |        |                            |
| Fingerprint                            | Bit/Smiles  | Feature Structure                                                                                                                                | Score  | Carcinogen in training set |
| SCFP_6                                 | 1257084377  | <br><chem>[*]NC(=O)[c](:[*]):[*]</chem>                       | -0.436 | 4 out of 21                |
| SCFP_6                                 | 124026986   | <br><chem>[*]:[cH]:[c](:[cH]):[*])C(=O)N[c](:[*]):[*]</chem> | -0.278 | 0 out of 1                 |
| SCFP_6                                 | -1503458502 | <br><chem>[*][c]1:[cH]:[cH]:[c](OC):[c](OC):[cH]:1</chem>   | -0.278 | 0 out of 1                 |



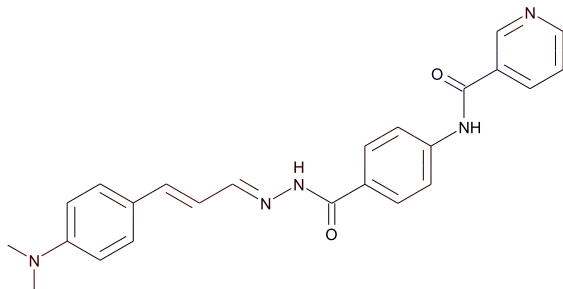

$C_{24}H_{23}N_5O_2$

Molecular Weight: 413.47172

ALogP: 2.839

Rotatable Bonds: 7

Acceptors: 5

Donors: 2

## Model Prediction

Prediction: Carcinogen

Probability: 0.486

Enrichment: 1.45

Bayesian Score: 3.97

Mahalanobis Distance: 16.9

Mahalanobis Distance p-value: 5.5e-011

Prediction: Positive if the Bayesian score is above the estimated best cutoff value from minimizing the false positive and false negative rate.

Probability: The estimated probability that the sample is in the positive category. This assumes that the Bayesian score follows a normal distribution and is different from the prediction using a cutoff.

Enrichment: An estimate of enrichment, that is, the increased likelihood (versus random) of this sample being in the category.

Bayesian Score: The standard Laplacian-modified Bayesian score.

Mahalanobis Distance: The Mahalanobis distance (MD) is the distance to the center of the training data. The larger the MD, the less trustworthy the prediction.

Mahalanobis Distance p-value: The p-value gives the fraction of training data with an MD greater than or equal to the one for the given sample, assuming normally distributed data. The smaller the p-value, the less trustworthy the prediction. For highly non-normal X properties (e.g., fingerprints), the MD p-value is wildly inaccurate.

## Structural Similar Compounds

| Name               | Bicalutamide                                                        | Flecainide                                                          | Cisapride                                                           |
|--------------------|---------------------------------------------------------------------|---------------------------------------------------------------------|---------------------------------------------------------------------|
| Structure          |                                                                     |                                                                     |                                                                     |
| Actual Endpoint    | Carcinogen                                                          | Non-Carcinogen                                                      | Non-Carcinogen                                                      |
| Predicted Endpoint | Carcinogen                                                          | Non-Carcinogen                                                      | Non-Carcinogen                                                      |
| Distance           | 0.583                                                               | 0.634                                                               | 0.635                                                               |
| Reference          | US FDA (Centre for Drug Eval.& Res./Off. Testing & Res.) Sept. 1997 | US FDA (Centre for Drug Eval.& Res./Off. Testing & Res.) Sept. 1997 | US FDA (Centre for Drug Eval.& Res./Off. Testing & Res.) Sept. 1997 |

## Model Applicability

Unknown features are fingerprint features in the query molecule, but not found or appearing too infrequently in the training set.

- OPS PC12 out of range. Value: -4.5678. Training min, max, SD, explained variance: -3.9196, 6.4101, 1.581, 0.0233.

## Feature Contribution

| Top features for positive contribution |            |                                                   |       |                            |
|----------------------------------------|------------|---------------------------------------------------|-------|----------------------------|
| Fingerprint                            | Bit/Smiles | Feature Structure                                 | Score | Carcinogen in training set |
| SCFP_6                                 | -347048986 | <br>[*]C(=[*])N[c]1:[cH]:<br>[cH]:[*]:[cH]:[cH]:1 | 0.615 | 5 out of 7                 |



|                                        |             |                                                                                                                                            |        |                            |
|----------------------------------------|-------------|--------------------------------------------------------------------------------------------------------------------------------------------|--------|----------------------------|
| SCFP_6                                 | -1971137145 | 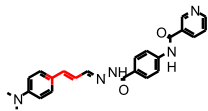<br><chem>[*]C=C[c]([*]):[*]</chem>                     | 0.434  | 5 out of 9                 |
| SCFP_6                                 | -1977229858 | <br><chem>[*]=C[C=C][c]([*]):[*]</chem>                 | 0.425  | 2 out of 3                 |
| Top Features for negative contribution |             |                                                                                                                                            |        |                            |
| Fingerprint                            | Bit/Smiles  | Feature Structure                                                                                                                          | Score  | Carcinogen in training set |
| SCFP_6                                 | 1257084377  | <br><chem>[*]NC(=O)[c]([*]):[*]</chem>                  | -0.436 | 4 out of 21                |
| SCFP_6                                 | 2096901122  | <br><chem>[*]:[cH]:[c](NC(=O)[c]([*]):[*]):[*]</chem> | -0.278 | 0 out of 1                 |
| SCFP_6                                 | 124026986   | <br><chem>[*]:[cH]:[c]([*]):[*]</chem>                | -0.278 | 0 out of 1                 |



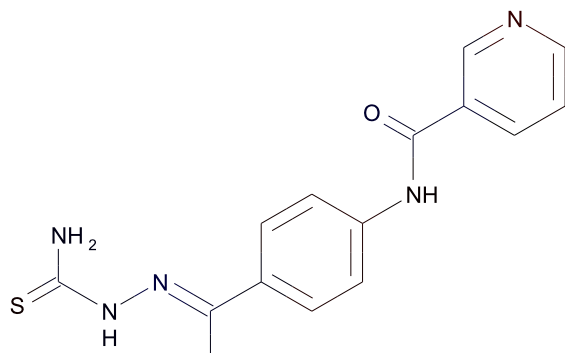

$C_{15}H_{15}N_5OS$

Molecular Weight: 313.3775

ALogP: 1.414

Rotatable Bonds: 5

Acceptors: 4

Donors: 3

## Model Prediction

Prediction: Carcinogen

Probability: 0.361

Enrichment: 1.08

Bayesian Score: 0.149

Mahalanobis Distance: 15.1

Mahalanobis Distance p-value: 3.35e-007

Prediction: Positive if the Bayesian score is above the estimated best cutoff value from minimizing the false positive and false negative rate.

Probability: The estimated probability that the sample is in the positive category. This assumes that the Bayesian score follows a normal distribution and is different from the prediction using a cutoff.

Enrichment: An estimate of enrichment, that is, the increased likelihood (versus random) of this sample being in the category.

Bayesian Score: The standard Laplacian-modified Bayesian score.

Mahalanobis Distance: The Mahalanobis distance (MD) is the distance to the center of the training data. The larger the MD, the less trustworthy the prediction.

Mahalanobis Distance p-value: The p-value gives the fraction of training data with an MD greater than or equal to the one for the given sample, assuming normally distributed data. The smaller the p-value, the less trustworthy the prediction. For highly non-normal X properties (e.g., fingerprints), the MD p-value is wildly inaccurate.

## Structural Similar Compounds

| Name               | Chloramphenicol                                                     | Furosemide                                                          | Tolbutamide                                                         |
|--------------------|---------------------------------------------------------------------|---------------------------------------------------------------------|---------------------------------------------------------------------|
| Structure          |                                                                     |                                                                     |                                                                     |
| Actual Endpoint    | Non-Carcinogen                                                      | Carcinogen                                                          | Non-Carcinogen                                                      |
| Predicted Endpoint | Non-Carcinogen                                                      | Carcinogen                                                          | Non-Carcinogen                                                      |
| Distance           | 0.567                                                               | 0.567                                                               | 0.576                                                               |
| Reference          | US FDA (Centre for Drug Eval.& Res./Off. Testing & Res.) Sept. 1997 | US FDA (Centre for Drug Eval.& Res./Off. Testing & Res.) Sept. 1997 | US FDA (Centre for Drug Eval.& Res./Off. Testing & Res.) Sept. 1997 |

## Model Applicability

Unknown features are fingerprint features in the query molecule, but not found or appearing too infrequently in the training set.

1. All properties and OPS components are within expected ranges.

## Feature Contribution

### Top features for positive contribution

| Fingerprint | Bit/Smiles | Feature Structure                                 | Score | Carcinogen in training set |
|-------------|------------|---------------------------------------------------|-------|----------------------------|
| SCFP_6      | -347048986 | <br>[*]C(=[*])N[c]1:[cH]:<br>[cH]:[*]:[cH]:[cH]:1 | 0.615 | 5 out of 7                 |



|                                        |            |                                                                                                                                          |        |                            |
|----------------------------------------|------------|------------------------------------------------------------------------------------------------------------------------------------------|--------|----------------------------|
| SCFP_6                                 | -105808146 | 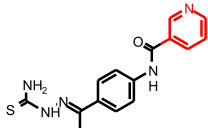<br><chem>[*][c]1:[cH]:[cH]:[cH]:[cH]:n:[cH]:1</chem> | 0.415  | 1 out of 1                 |
| SCFP_6                                 | -758850909 | <br><chem>[*][c]1:[*]:n:[cH]:[cH]:[cH]:1</chem>       | 0.355  | 5 out of 10                |
| Top Features for negative contribution |            |                                                                                                                                          |        |                            |
| Fingerprint                            | Bit/Smiles | Feature Structure                                                                                                                        | Score  | Carcinogen in training set |
| SCFP_6                                 | 1257084377 | <br><chem>[*]NC(=O)[c](:[*]):[*]</chem>               | -0.436 | 4 out of 21                |
| SCFP_6                                 | 384861283  | <br><chem>[*]C(=[*])N</chem>                         | -0.38  | 1 out of 6                 |
| SCFP_6                                 | 827404948  | <br><chem>[*]C(=[*])NN=[*]</chem>                   | -0.278 | 0 out of 1                 |



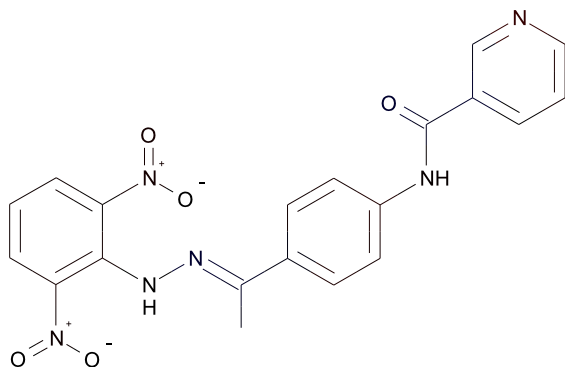

$C_{20}H_{16}N_6O_5$

Molecular Weight: 420.37824

ALogP: 2.852

Rotatable Bonds: 7

Acceptors: 8

Donors: 2

## Model Prediction

**Prediction: Carcinogen**

Probability: 0.386

Enrichment: 1.16

Bayesian Score: 0.995

Mahalanobis Distance: 20

Mahalanobis Distance p-value: 1.22e-018

Prediction: Positive if the Bayesian score is above the estimated best cutoff value from minimizing the false positive and false negative rate.

Probability: The estimated probability that the sample is in the positive category. This assumes that the Bayesian score follows a normal distribution and is different from the prediction using a cutoff.

Enrichment: An estimate of enrichment, that is, the increased likelihood (versus random) of this sample being in the category.

Bayesian Score: The standard Laplacian-modified Bayesian score.

Mahalanobis Distance: The Mahalanobis distance (MD) is the distance to the center of the training data. The larger the MD, the less trustworthy the prediction.

Mahalanobis Distance p-value: The p-value gives the fraction of training data with an MD greater than or equal to the one for the given sample, assuming normally distributed data. The smaller the p-value, the less trustworthy the prediction. For highly non-normal X properties (e.g., fingerprints), the MD p-value is wildly inaccurate.

## Structural Similar Compounds

| Name               | Sulfasalazine                                                       | Nedocromil                                                          | Nisoldipine                                                         |
|--------------------|---------------------------------------------------------------------|---------------------------------------------------------------------|---------------------------------------------------------------------|
| Structure          |                                                                     |                                                                     |                                                                     |
| Actual Endpoint    | Carcinogen                                                          | Non-Carcinogen                                                      | Non-Carcinogen                                                      |
| Predicted Endpoint | Carcinogen                                                          | Non-Carcinogen                                                      | Carcinogen                                                          |
| Distance           | 0.604                                                               | 0.619                                                               | 0.666                                                               |
| Reference          | US FDA (Centre for Drug Eval.& Res./Off. Testing & Res.) Sept. 1997 | US FDA (Centre for Drug Eval.& Res./Off. Testing & Res.) Sept. 1997 | US FDA (Centre for Drug Eval.& Res./Off. Testing & Res.) Sept. 1997 |

## Model Applicability

Unknown features are fingerprint features in the query molecule, but not found or appearing too infrequently in the training set.

1. OPS PC12 out of range. Value: -4.5928. Training min, max, SD, explained variance: -3.9196, 6.4101, 1.581, 0.0233.

## Feature Contribution

### Top features for positive contribution

| Fingerprint | Bit/Smiles | Feature Structure                                 | Score | Carcinogen in training set |
|-------------|------------|---------------------------------------------------|-------|----------------------------|
| SCFP_6      | -347048986 | <br>[*]C(=[*])N[c]1:[cH]:<br>[cH]:[*]:[cH]:[cH]:1 | 0.615 | 5 out of 7                 |



|                                        |            |                                                                                                                                                   |        |                            |
|----------------------------------------|------------|---------------------------------------------------------------------------------------------------------------------------------------------------|--------|----------------------------|
| SCFP_6                                 | -105808146 | 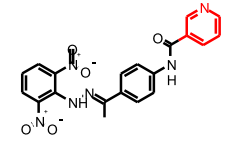<br><chem>[*][c]1:[cH]:[cH]:[cH]:[cH]:n:[cH]:1</chem>          | 0.415  | 1 out of 1                 |
| SCFP_6                                 | 1311339974 | <br><chem>[*][N+](=O)[*]</chem>                                | 0.405  | 13 out of 26               |
| Top Features for negative contribution |            |                                                                                                                                                   |        |                            |
| Fingerprint                            | Bit/Smiles | Feature Structure                                                                                                                                 | Score  | Carcinogen in training set |
| SCFP_6                                 | 1257084377 | <br><chem>[*]NC(=O)[c](:[*]):[*]</chem>                        | -0.436 | 4 out of 21                |
| SCFP_6                                 | -331724199 | <br><chem>[*]N=C(/C)\[c](:[*]):[*]</chem>                     | -0.278 | 0 out of 1                 |
| SCFP_6                                 | 124026986  | <br><chem>[*]:[cH]:[c](:[cH]):[*])C(=O)N[c](:[*]):[*]</chem> | -0.278 | 0 out of 1                 |



# Sorafenib

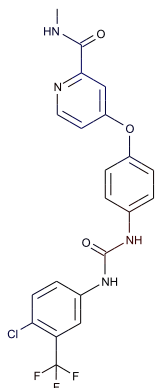

$C_{21}H_{16}ClF_3N_4O_3$

Molecular Weight: 464.82494

ALogP: 4.175

Rotatable Bonds: 6

Acceptors: 4

Donors: 3

## Model Prediction

Prediction: Non-Carcinogen

Probability: 0.293

Enrichment: 0.878

Bayesian Score: -2.4

Mahalanobis Distance: 17.6

Mahalanobis Distance p-value: 1.1e-012

Prediction: Positive if the Bayesian score is above the estimated best cutoff value from minimizing the false positive and false negative rate.

Probability: The estimated probability that the sample is in the positive category. This assumes that the Bayesian score follows a normal distribution and is different from the prediction using a cutoff.

Enrichment: An estimate of enrichment, that is, the increased likelihood (versus random) of this sample being in the category.

Bayesian Score: The standard Laplacian-modified Bayesian score.

Mahalanobis Distance: The Mahalanobis distance (MD) is the distance to the center of the training data. The larger the MD, the less trustworthy the prediction.

Mahalanobis Distance p-value: The p-value gives the fraction of training data with an MD greater than or equal to the one for the given sample, assuming normally distributed data. The smaller the p-value, the less trustworthy the prediction. For highly non-normal X properties (e.g., fingerprints), the MD p-value is wildly inaccurate.

# TOPKAT\_Rat\_Male\_FDA\_None\_vs\_Carcinogen

## Structural Similar Compounds

| Name               | Glyburide                                                           | Glimepiride                                                         | Fluvastatin                                                         |
|--------------------|---------------------------------------------------------------------|---------------------------------------------------------------------|---------------------------------------------------------------------|
| Structure          |                                                                     |                                                                     |                                                                     |
| Actual Endpoint    | Non-Carcinogen                                                      | Non-Carcinogen                                                      | Carcinogen                                                          |
| Predicted Endpoint | Non-Carcinogen                                                      | Non-Carcinogen                                                      | Carcinogen                                                          |
| Distance           | 0.593                                                               | 0.600                                                               | 0.615                                                               |
| Reference          | US FDA (Centre for Drug Eval.& Res./Off. Testing & Res.) Sept. 1997 | US FDA (Centre for Drug Eval.& Res./Off. Testing & Res.) Sept. 1997 | US FDA (Centre for Drug Eval.& Res./Off. Testing & Res.) Sept. 1997 |

## Model Applicability

Unknown features are fingerprint features in the query molecule, but not found or appearing too infrequently in the training set.

1. All properties and OPS components are within expected ranges.

## Feature Contribution

### Top features for positive contribution

| Fingerprint | Bit/Smiles | Feature Structure                                   | Score | Carcinogen in training set |
|-------------|------------|-----------------------------------------------------|-------|----------------------------|
| SCFP_6      | -347048986 | <br>[*]C(=[*])N([c]F):[cH]:<br>[cH]:[*]:[cH]:[cH]:1 | 0.615 | 5 out of 7                 |



| SCFP_6                                 | -754059116 | 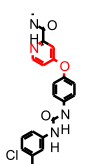<br><chem>[*]O[c]1:[cH]:[*]:n:[cH]:[cH]:1</chem>                                | 0.415  | 1 out of 1                 |
|----------------------------------------|------------|--------------------------------------------------------------------------------------------------------------------------------------------------------------------|--------|----------------------------|
| SCFP_6                                 | -347281112 | <br><chem>[*]N[c]1:[cH]:[*]:[c]([*]):[c](:[cH]:1)C([*])([*])[*]</chem>          | 0.273  | 2 out of 4                 |
| Top Features for negative contribution |            |                                                                                                                                                                    |        |                            |
| Fingerprint                            | Bit/Smiles | Feature Structure                                                                                                                                                  | Score  | Carcinogen in training set |
| SCFP_6                                 | -827073191 | <br><chem>[*]C(=[*])[c]1:[cH]:[*]:[cH]:[cH]:n:1</chem>                          | -0.674 | 0 out of 3                 |
| SCFP_6                                 | -488587948 | <br><chem>[*][c]1:[*]:[cH]:[cH]:[cH]:[c]([*])([O[c](:[*]):[*]):[cH]:1</chem>   | -0.496 | 0 out of 2                 |
| SCFP_6                                 | -975241316 | <br><chem>[*][c]1:[cH]:[cH]:[c]([*])([O[c](:[cH]:[*]):[cH]:[cH]:[cH]:1</chem> | -0.496 | 0 out of 2                 |



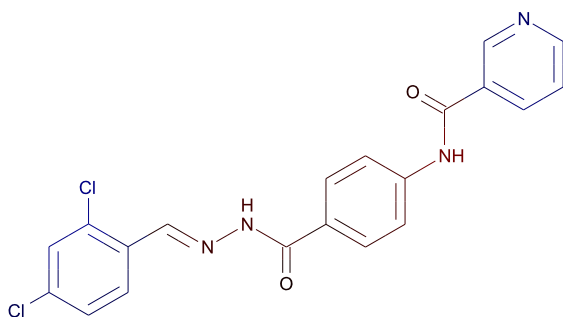

$C_{20}H_{14}Cl_2N_4O_2$

Molecular Weight: 413.25676

ALogP: 3.646

Rotatable Bonds: 5

Acceptors: 4

Donors: 2

## Model Prediction

Prediction: Single-Carcinogen

Probability: 0.535

Enrichment: 1.29

Bayesian Score: -2.02

Mahalanobis Distance: 11.7

Mahalanobis Distance p-value: 0.00711

Prediction: Positive if the Bayesian score is above the estimated best cutoff value from minimizing the false positive and false negative rate.

Probability: The estimated probability that the sample is in the positive category. This assumes that the Bayesian score follows a normal distribution and is different from the prediction using a cutoff.

Enrichment: An estimate of enrichment, that is, the increased likelihood (versus random) of this sample being in the category.

Bayesian Score: The standard Laplacian-modified Bayesian score.

Mahalanobis Distance: The Mahalanobis distance (MD) is the distance to the center of the training data. The larger the MD, the less trustworthy the prediction.

Mahalanobis Distance p-value: The p-value gives the fraction of training data with an MD greater than or equal to the one for the given sample, assuming normally distributed data. The smaller the p-value, the less trustworthy the prediction. For highly non-normal X properties (e.g., fingerprints), the MD p-value is wildly inaccurate.

## Structural Similar Compounds

| Name               | Bicalutamide                                                        | Doxefazepam                                                         | Lansoprazole                                                        |
|--------------------|---------------------------------------------------------------------|---------------------------------------------------------------------|---------------------------------------------------------------------|
| Structure          |                                                                     |                                                                     |                                                                     |
| Actual Endpoint    | Multiple-Carcinogen                                                 | Single-Carcinogen                                                   | Multiple-Carcinogen                                                 |
| Predicted Endpoint | Multiple-Carcinogen                                                 | Single-Carcinogen                                                   | Multiple-Carcinogen                                                 |
| Distance           | 0.625                                                               | 0.636                                                               | 0.688                                                               |
| Reference          | US FDA (Centre for Drug Eval.& Res./Off. Testing & Res.) Sept. 1997 | US FDA (Centre for Drug Eval.& Res./Off. Testing & Res.) Sept. 1997 | US FDA (Centre for Drug Eval.& Res./Off. Testing & Res.) Sept. 1997 |

## Model Applicability

Unknown features are fingerprint features in the query molecule, but not found or appearing too infrequently in the training set.

1. All properties and OPS components are within expected ranges.

## Feature Contribution

### Top features for positive contribution

| Fingerprint | Bit/Smiles | Feature Structure                                     | Score | Multiple-Carcinogen in training set |
|-------------|------------|-------------------------------------------------------|-------|-------------------------------------|
| SCFP_8      | -347048986 | <p>[*]C(=[*])N[c]1:[cH]:<br/>[cH]:[*]:[cH]:[cH]:1</p> | 0.574 | 4 out of 5                          |



|                                        |            |                                                                                                                                               |        |                                     |
|----------------------------------------|------------|-----------------------------------------------------------------------------------------------------------------------------------------------|--------|-------------------------------------|
| SCFP_8                                 | 1631845520 | 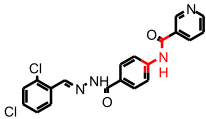<br><chem>[*]C(=[*])N[c](:[*]):</chem><br><chem>[*]</chem> | 0.495  | 6 out of 9                          |
| SCFP_8                                 | 1257084377 | <br><chem>[*]NC(=O)[c](:[*]):[*]</chem><br><chem>]</chem>  | 0.489  | 3 out of 4                          |
| Top Features for negative contribution |            |                                                                                                                                               |        |                                     |
| Fingerprint                            | Bit/Smiles | Feature Structure                                                                                                                             | Score  | Multiple-Carcinogen in training set |
| SCFP_8                                 | -758850909 | <br><chem>[*][c]1:[*]:n:[cH]:[cH]:[cH]:1</chem>            | -1.04  | 0 out of 5                          |
| SCFP_8                                 | -601571304 | <br><chem>[*][c](:[*]):[c](Cl):[cH]:[*]</chem>           | -0.707 | 2 out of 14                         |
| SCFP_8                                 | -52074512  | <br><chem>[*]:[c](:[*])Cl</chem>                         | -0.707 | 2 out of 14                         |







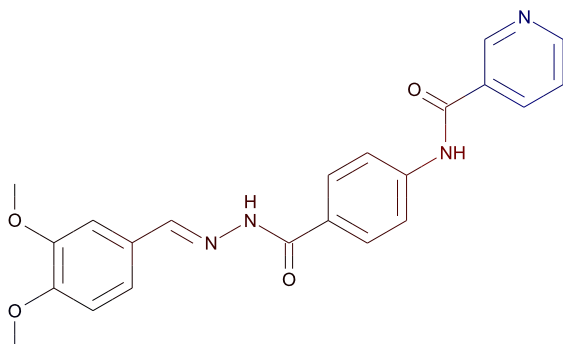
 $C_{22}H_{20}N_4O_4$ 

Molecular Weight: 404.4186

ALogP: 2.284

Rotatable Bonds: 7

Acceptors: 6

Donors: 2

## Model Prediction

Prediction: Single-Carcinogen

Probability: 0.557

Enrichment: 1.35

Bayesian Score: -0.609

Mahalanobis Distance: 20.1

Mahalanobis Distance p-value: 2.4e-010

Prediction: Positive if the Bayesian score is above the estimated best cutoff value from minimizing the false positive and false negative rate.

Probability: The estimated probability that the sample is in the positive category. This assumes that the Bayesian score follows a normal distribution and is different from the prediction using a cutoff.

Enrichment: An estimate of enrichment, that is, the increased likelihood (versus random) of this sample being in the category.

Bayesian Score: The standard Laplacian-modified Bayesian score.

Mahalanobis Distance: The Mahalanobis distance (MD) is the distance to the center of the training data. The larger the MD, the less trustworthy the prediction.

Mahalanobis Distance p-value: The p-value gives the fraction of training data with an MD greater than or equal to the one for the given sample, assuming normally distributed data. The smaller the p-value, the less trustworthy the prediction. For highly non-normal X properties (e.g., fingerprints), the MD p-value is wildly inaccurate.

## Structural Similar Compounds

| Name               | Bicalutamide                                                        | Moricizine                                                          | Isradipine                                                          |
|--------------------|---------------------------------------------------------------------|---------------------------------------------------------------------|---------------------------------------------------------------------|
| Structure          |                                                                     |                                                                     |                                                                     |
| Actual Endpoint    | Multiple-Carcinogen                                                 | Single-Carcinogen                                                   | Single-Carcinogen                                                   |
| Predicted Endpoint | Multiple-Carcinogen                                                 | Single-Carcinogen                                                   | Single-Carcinogen                                                   |
| Distance           | 0.605                                                               | 0.675                                                               | 0.693                                                               |
| Reference          | US FDA (Centre for Drug Eval.& Res./Off. Testing & Res.) Sept. 1997 | US FDA (Centre for Drug Eval.& Res./Off. Testing & Res.) Sept. 1997 | US FDA (Centre for Drug Eval.& Res./Off. Testing & Res.) Sept. 1997 |

## Model Applicability

Unknown features are fingerprint features in the query molecule, but not found or appearing too infrequently in the training set.

1. OPS PC4 out of range. Value: 6.2282. Training min, max, SD, explained variance: -6.1092, 5.1042, 2.173, 0.0642.

## Feature Contribution

| Top features for positive contribution |            |                                                  |       |                                     |
|----------------------------------------|------------|--------------------------------------------------|-------|-------------------------------------|
| Fingerprint                            | Bit/Smiles | Feature Structure                                | Score | Multiple-Carcinogen in training set |
| SCFP_8                                 | -347048986 | <p>[*]C(=[*])N[c]1:[cH]:[cH]:[*]:[cH]:[cH]:1</p> | 0.574 | 4 out of 5                          |



|                                        |            |                                                                                                                                                      |        |                                     |
|----------------------------------------|------------|------------------------------------------------------------------------------------------------------------------------------------------------------|--------|-------------------------------------|
| SCFP_8                                 | 1631845520 | 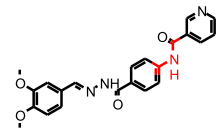<br><chem>[*]C(=[*])N[c](:[*]):</chem><br><chem>[*]</chem>        | 0.495  | 6 out of 9                          |
| SCFP_8                                 | 1257084377 | <br><chem>[*]NC(=O)[c](:[*]):[*]</chem><br><chem>]</chem>         | 0.489  | 3 out of 4                          |
| Top Features for negative contribution |            |                                                                                                                                                      |        |                                     |
| Fingerprint                            | Bit/Smiles | Feature Structure                                                                                                                                    | Score  | Multiple-Carcinogen in training set |
| SCFP_8                                 | -758850909 | <br><chem>[*][c]1:[*]:n:[cH]:[cH]:[cH]:1</chem>                   | -1.04  | 0 out of 5                          |
| SCFP_8                                 | -937094999 | <br><chem>[*]1:[cH]:[cH]:[cH]:n</chem><br><chem>: [cH]:1</chem> | -0.463 | 1 out of 6                          |
| SCFP_8                                 | 136239834  | <br><chem>[*]OC</chem>                                          | -0.358 | 3 out of 13                         |







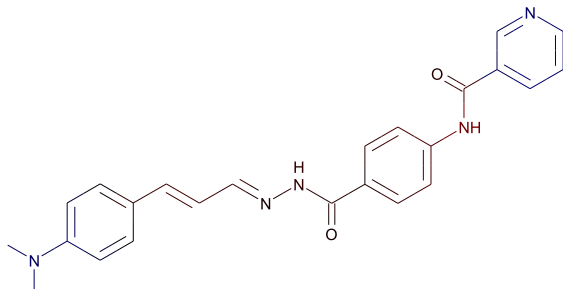

$C_{24}H_{23}N_5O_2$

Molecular Weight: 413.47172

ALogP: 2.839

Rotatable Bonds: 7

Acceptors: 5

Donors: 2

## Model Prediction

Prediction: Single-Carcinogen

Probability: 0.553

Enrichment: 1.34

Bayesian Score: -0.946

Mahalanobis Distance: 14.1

Mahalanobis Distance p-value: 7.2e-005

Prediction: Positive if the Bayesian score is above the estimated best cutoff value from minimizing the false positive and false negative rate.

Probability: The estimated probability that the sample is in the positive category. This assumes that the Bayesian score follows a normal distribution and is different from the prediction using a cutoff.

Enrichment: An estimate of enrichment, that is, the increased likelihood (versus random) of this sample being in the category.

Bayesian Score: The standard Laplacian-modified Bayesian score.

Mahalanobis Distance: The Mahalanobis distance (MD) is the distance to the center of the training data. The larger the MD, the less trustworthy the prediction.

Mahalanobis Distance p-value: The p-value gives the fraction of training data with an MD greater than or equal to the one for the given sample, assuming normally distributed data. The smaller the p-value, the less trustworthy the prediction. For highly non-normal X properties (e.g., fingerprints), the MD p-value is wildly inaccurate.

## Structural Similar Compounds

| Name               | Bicalutamide                                                        | Moricizine                                                          | Felodipine                                                          |
|--------------------|---------------------------------------------------------------------|---------------------------------------------------------------------|---------------------------------------------------------------------|
| Structure          |                                                                     |                                                                     |                                                                     |
| Actual Endpoint    | Multiple-Carcinogen                                                 | Single-Carcinogen                                                   | Single-Carcinogen                                                   |
| Predicted Endpoint | Multiple-Carcinogen                                                 | Single-Carcinogen                                                   | Single-Carcinogen                                                   |
| Distance           | 0.590                                                               | 0.686                                                               | 0.698                                                               |
| Reference          | US FDA (Centre for Drug Eval.& Res./Off. Testing & Res.) Sept. 1997 | US FDA (Centre for Drug Eval.& Res./Off. Testing & Res.) Sept. 1997 | US FDA (Centre for Drug Eval.& Res./Off. Testing & Res.) Sept. 1997 |

## Model Applicability

Unknown features are fingerprint features in the query molecule, but not found or appearing too infrequently in the training set.

1. OPS PC14 out of range. Value: 3.4917. Training min, max, SD, explained variance: -3.4626, 3.2359, 1.286, 0.0225.

## Feature Contribution

| Top features for positive contribution |            |                                                  |       |                                     |
|----------------------------------------|------------|--------------------------------------------------|-------|-------------------------------------|
| Fingerprint                            | Bit/Smiles | Feature Structure                                | Score | Multiple-Carcinogen in training set |
| SCFP_8                                 | -347048986 | <p>[*]C(=[*])N[c]1:[cH]:[cH]:[*]:[cH]:[cH]:1</p> | 0.574 | 4 out of 5                          |



|                                        |             |                                                                                                                                           |        |                                     |
|----------------------------------------|-------------|-------------------------------------------------------------------------------------------------------------------------------------------|--------|-------------------------------------|
| SCFP_8                                 | -1977229858 | 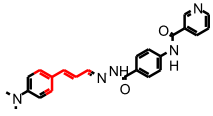<br><chem>[*]=C[C=C][c]([cH]:[*])[cH]:[*]</chem>       | 0.553  | 2 out of 2                          |
| SCFP_8                                 | 1631845520  | <br><chem>[*]C(=[*])N[c]([*]):[*]</chem>               | 0.495  | 6 out of 9                          |
| Top Features for negative contribution |             |                                                                                                                                           |        |                                     |
| Fingerprint                            | Bit/Smiles  | Feature Structure                                                                                                                         | Score  | Multiple-Carcinogen in training set |
| SCFP_8                                 | -758850909  | <br><chem>[*][c]1:[*]:n:[cH]:[cH]:[cH]:1</chem>        | -1.04  | 0 out of 5                          |
| SCFP_8                                 | -299436502  | <br><chem>CN(C)[c]1:[cH]:[cH]:[*]:[cH]:[cH]:1</chem> | -0.737 | 0 out of 3                          |
| SCFP_8                                 | -1853624961 | <br><chem>[*]:[c]([*])N(C)C</chem>                   | -0.669 | 1 out of 8                          |







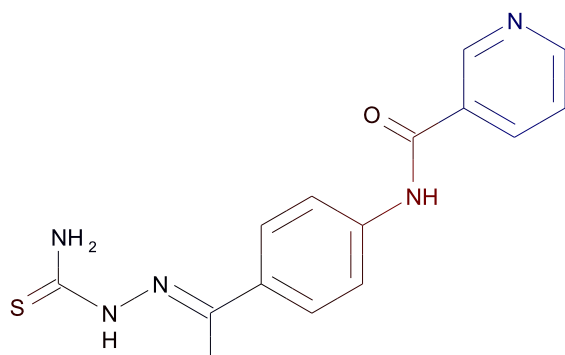

$C_{15}H_{15}N_5OS$

Molecular Weight: 313.3775

ALogP: 1.414

Rotatable Bonds: 5

Acceptors: 4

Donors: 3

## Model Prediction

**Prediction: Multiple-Carcinogen**

Probability: 0.568

Enrichment: 1.37

Bayesian Score: 0.852

Mahalanobis Distance: 14.1

Mahalanobis Distance p-value: 6.91e-005

Prediction: Positive if the Bayesian score is above the estimated best cutoff value from minimizing the false positive and false negative rate.

Probability: The estimated probability that the sample is in the positive category. This assumes that the Bayesian score follows a normal distribution and is different from the prediction using a cutoff.

Enrichment: An estimate of enrichment, that is, the increased likelihood (versus random) of this sample being in the category.

Bayesian Score: The standard Laplacian-modified Bayesian score.

Mahalanobis Distance: The Mahalanobis distance (MD) is the distance to the center of the training data. The larger the MD, the less trustworthy the prediction.

Mahalanobis Distance p-value: The p-value gives the fraction of training data with an MD greater than or equal to the one for the given sample, assuming normally distributed data. The smaller the p-value, the less trustworthy the prediction. For highly non-normal X properties (e.g., fingerprints), the MD p-value is wildly inaccurate.

## Structural Similar Compounds

| Name               | Furosemide                                                          | Torsemide                                                           | Sulfamethazine                                                      |
|--------------------|---------------------------------------------------------------------|---------------------------------------------------------------------|---------------------------------------------------------------------|
| Structure          |                                                                     |                                                                     |                                                                     |
| Actual Endpoint    | Single-Carcinogen                                                   | Multiple-Carcinogen                                                 | Single-Carcinogen                                                   |
| Predicted Endpoint | Single-Carcinogen                                                   | Multiple-Carcinogen                                                 | Single-Carcinogen                                                   |
| Distance           | 0.577                                                               | 0.707                                                               | 0.717                                                               |
| Reference          | US FDA (Centre for Drug Eval.& Res./Off. Testing & Res.) Sept. 1997 | US FDA (Centre for Drug Eval.& Res./Off. Testing & Res.) Sept. 1997 | US FDA (Centre for Drug Eval.& Res./Off. Testing & Res.) Sept. 1997 |

## Model Applicability

Unknown features are fingerprint features in the query molecule, but not found or appearing too infrequently in the training set.

1. All properties and OPS components are within expected ranges.

## Feature Contribution

### Top features for positive contribution

| Fingerprint | Bit/Smiles | Feature Structure                                 | Score | Multiple-Carcinogen in training set |
|-------------|------------|---------------------------------------------------|-------|-------------------------------------|
| SCFP_8      | -347048986 | <br>[*]C(=[*])N[c]1:[cH]:<br>[cH]:[*]:[cH]:[cH]:1 | 0.574 | 4 out of 5                          |



|                                        |            |                                                                                                                                    |        |                                     |
|----------------------------------------|------------|------------------------------------------------------------------------------------------------------------------------------------|--------|-------------------------------------|
| SCFP_8                                 | 1435188938 | 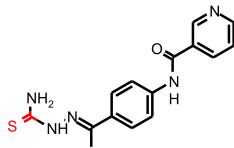<br><chem>[*]C(=S)[*]</chem>                    | 0.553  | 2 out of 2                          |
| SCFP_8                                 | 18         | <br><chem>[*]=S</chem>                          | 0.553  | 2 out of 2                          |
| Top Features for negative contribution |            |                                                                                                                                    |        |                                     |
| Fingerprint                            | Bit/Smiles | Feature Structure                                                                                                                  | Score  | Multiple-Carcinogen in training set |
| SCFP_8                                 | -758850909 | <br><chem>[*][c]1:[*]:n:[cH]:[cH]:[cH]:1</chem> | -1.04  | 0 out of 5                          |
| SCFP_8                                 | -937094999 | <br><chem>[*]1:[cH]:[cH]:[cH]:n:[cH]:1</chem> | -0.463 | 1 out of 6                          |
| SCFP_8                                 | 136627117  | <br><chem>[*]C(=[*])C</chem>                  | -0.41  | 4 out of 18                         |







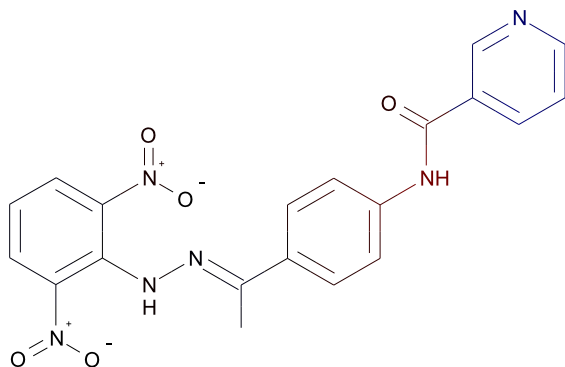

$C_{20}H_{16}N_6O_5$

Molecular Weight: 420.37824

ALogP: 2.852

Rotatable Bonds: 7

Acceptors: 8

Donors: 2

## Model Prediction

Prediction: Single-Carcinogen

Probability: 0.542

Enrichment: 1.31

Bayesian Score: -1.65

Mahalanobis Distance: 13.1

Mahalanobis Distance p-value: 0.000507

Prediction: Positive if the Bayesian score is above the estimated best cutoff value from minimizing the false positive and false negative rate.

Probability: The estimated probability that the sample is in the positive category. This assumes that the Bayesian score follows a normal distribution and is different from the prediction using a cutoff.

Enrichment: An estimate of enrichment, that is, the increased likelihood (versus random) of this sample being in the category.

Bayesian Score: The standard Laplacian-modified Bayesian score.

Mahalanobis Distance: The Mahalanobis distance (MD) is the distance to the center of the training data. The larger the MD, the less trustworthy the prediction.

Mahalanobis Distance p-value: The p-value gives the fraction of training data with an MD greater than or equal to the one for the given sample, assuming normally distributed data. The smaller the p-value, the less trustworthy the prediction. For highly non-normal X properties (e.g., fingerprints), the MD p-value is wildly inaccurate.

## Structural Similar Compounds

| Name               | Sulfasalazine                                                       | Isradipine                                                          | Nimodipine                                                          |
|--------------------|---------------------------------------------------------------------|---------------------------------------------------------------------|---------------------------------------------------------------------|
| Structure          |                                                                     |                                                                     |                                                                     |
| Actual Endpoint    | Single-Carcinogen                                                   | Single-Carcinogen                                                   | Single-Carcinogen                                                   |
| Predicted Endpoint | Single-Carcinogen                                                   | Single-Carcinogen                                                   | Single-Carcinogen                                                   |
| Distance           | 0.656                                                               | 0.743                                                               | 0.760                                                               |
| Reference          | US FDA (Centre for Drug Eval.& Res./Off. Testing & Res.) Sept. 1997 | US FDA (Centre for Drug Eval.& Res./Off. Testing & Res.) Sept. 1997 | US FDA (Centre for Drug Eval.& Res./Off. Testing & Res.) Sept. 1997 |

## Model Applicability

Unknown features are fingerprint features in the query molecule, but not found or appearing too infrequently in the training set.

- OPS PC14 out of range. Value: 3.3935. Training min, max, SD, explained variance: -3.4626, 3.2359, 1.286, 0.0225.

## Feature Contribution

| Top features for positive contribution |            |                                                       |       |                                     |
|----------------------------------------|------------|-------------------------------------------------------|-------|-------------------------------------|
| Fingerprint                            | Bit/Smiles | Feature Structure                                     | Score | Multiple-Carcinogen in training set |
| SCFP_8                                 | -347048986 | <p>[*]C(=[*])N[c]1:[cH]:<br/>[cH]:[*]:[cH]:[cH]:1</p> | 0.574 | 4 out of 5                          |



|                                        |            |                                                                                                                                         |        |                                     |
|----------------------------------------|------------|-----------------------------------------------------------------------------------------------------------------------------------------|--------|-------------------------------------|
| SCFP_8                                 | 1631845520 | 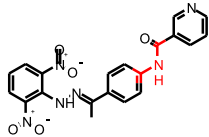<br><chem>[*]C(=[*])N[c](:[*]):[*]</chem>            | 0.495  | 6 out of 9                          |
| SCFP_8                                 | 1257084377 | <br><chem>[*]NC(=O)[c](:[*]):[*]</chem>              | 0.489  | 3 out of 4                          |
| Top Features for negative contribution |            |                                                                                                                                         |        |                                     |
| Fingerprint                            | Bit/Smiles | Feature Structure                                                                                                                       | Score  | Multiple-Carcinogen in training set |
| SCFP_8                                 | -758850909 | <br><chem>[*][c]1:[*]:n:[cH]:[cH]:[cH]:1</chem>      | -1.04  | 0 out of 5                          |
| SCFP_8                                 | -937094999 | <br><chem>[*]1:[cH]:[cH]:[cH]:[cH]:n:[cH]:1</chem> | -0.463 | 1 out of 6                          |
| SCFP_8                                 | 136627117  | <br><chem>[*]C(=[*])C</chem>                       | -0.41  | 4 out of 18                         |







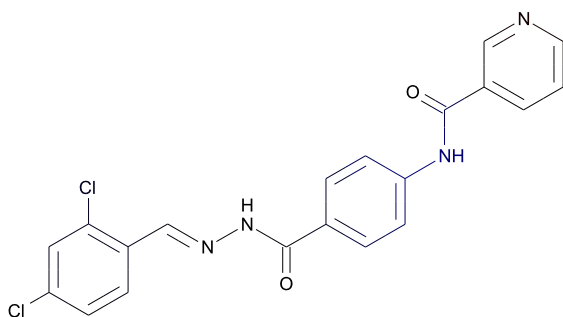
 $C_{20}H_{14}Cl_2N_4O_2$ 

Molecular Weight: 413.25676

ALogP: 3.646

Rotatable Bonds: 5

Acceptors: 4

Donors: 2

## Model Prediction

Prediction: Non-Irritant

Probability: 0.844

Enrichment: 0.916

Bayesian Score: -3.25

Mahalanobis Distance: 6.36

Mahalanobis Distance p-value: 1

Prediction: Positive if the Bayesian score is above the estimated best cutoff value from minimizing the false positive and false negative rate.

Probability: The estimated probability that the sample is in the positive category. This assumes that the Bayesian score follows a normal distribution and is different from the prediction using a cutoff.

Enrichment: An estimate of enrichment, that is, the increased likelihood (versus random) of this sample being in the category.

Bayesian Score: The standard Laplacian-modified Bayesian score.

Mahalanobis Distance: The Mahalanobis distance (MD) is the distance to the center of the training data. The larger the MD, the less trustworthy the prediction.

Mahalanobis Distance p-value: The p-value gives the fraction of training data with an MD greater than or equal to the one for the given sample, assuming normally distributed data. The smaller the p-value, the less trustworthy the prediction. For highly non-normal X properties (e.g., fingerprints), the MD p-value is wildly inaccurate.

## Structural Similar Compounds

| Name               | 5-Norbornene-2,3-dicarboxylic acid, 1,4,5,6,7,7-hexachloro-                                                                                          | Anthraquinone, 1,1'-iminodi-                                                                                                                         | 1-Piperazineacetic acid, 4-(2-hydroxyethyl)-alpha-phenyl-, 2,6-xylyl ester, monohydrochloride                                                                       |
|--------------------|------------------------------------------------------------------------------------------------------------------------------------------------------|------------------------------------------------------------------------------------------------------------------------------------------------------|---------------------------------------------------------------------------------------------------------------------------------------------------------------------|
| Structure          |                                                                                                                                                      |                                                                                                                                                      |                                                                                                                                                                     |
| Actual Endpoint    | Irritant                                                                                                                                             | Irritant                                                                                                                                             | Irritant                                                                                                                                                            |
| Predicted Endpoint | Irritant                                                                                                                                             | Non-Irritant                                                                                                                                         | Irritant                                                                                                                                                            |
| Distance           | 0.673                                                                                                                                                | 0.768                                                                                                                                                | 0.774                                                                                                                                                               |
| Reference          | 85JCAE "Prehled Prumyslove Toxikologie; Organické Latky," Marhold, J., Prague, Czechoslovakia, Avicenum, 1986<br>Volume(issue)/page/year: -,581,1986 | 85JCAE "Prehled Prumyslove Toxikologie; Organické Latky," Marhold, J., Prague, Czechoslovakia, Avicenum, 1986<br>Volume(issue)/page/year: -,735,1986 | BCFAAI Bollettino Chimico Farmaceutico. (Società Editoriale Farmaceutica, Via Ausonio 12, 20123 Milan, Italy) V.33- 1894-<br>Volume(issue)/page/year: 107,3 10,1968 |

## Model Applicability

Unknown features are fingerprint features in the query molecule, but not found or appearing too infrequently in the training set.

1. All properties and OPS components are within expected ranges.

## Feature Contribution

### Top features for positive contribution

| Fingerprint | Bit/Smiles | Feature Structure | Score | Irritant in training set |
|-------------|------------|-------------------|-------|--------------------------|
|-------------|------------|-------------------|-------|--------------------------|



|                                        |             |                                                                                                                                                     |        |                          |
|----------------------------------------|-------------|-----------------------------------------------------------------------------------------------------------------------------------------------------|--------|--------------------------|
| FCFP_12                                | -124655670  | 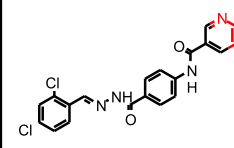<br><chem>[*]:[cH]:[cH]:n:[*]</chem>                             | 0.0821 | 13 out of 13             |
| FCFP_12                                | -2100785893 | <br><chem>[*]N=C[c](:[*]):[*]</chem>                             | 0.081  | 11 out of 11             |
| FCFP_12                                | -1695756380 | <br><chem>[*]1:[cH]:[cH]:[cH]:n<br/>:[cH]:1</chem>               | 0.0772 | 7 out of 7               |
| Top Features for negative contribution |             |                                                                                                                                                     |        |                          |
| Fingerprint                            | Bit/Smiles  | Feature Structure                                                                                                                                   | Score  | Irritant in training set |
| FCFP_12                                | -1838187238 | <br><chem>[*]C(=[*])N[c]1:[cH]:<br/>[cH]:[*]:[cH]:[cH]:1</chem> | -0.692 | 5 out of 12              |
| FCFP_12                                | 1294255210  | <br><chem>[*]C(=[*])N[c](:[*]):<br/>[*]</chem>                 | -0.486 | 12 out of 22             |



|         |            |                                                                                                                                                                                     |        |              |
|---------|------------|-------------------------------------------------------------------------------------------------------------------------------------------------------------------------------------|--------|--------------|
| FCFP_12 | -773983804 | 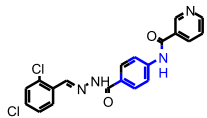<br><chem>O=C(Nc1ccccc1)C2=CC(=CC(=C2)Cl)Cl</chem><br>[*]N[c]1:[cH]:[*]:[c]<br>([*]):[cH]:[cH]:1 | -0.444 | 46 out of 79 |
|---------|------------|-------------------------------------------------------------------------------------------------------------------------------------------------------------------------------------|--------|--------------|



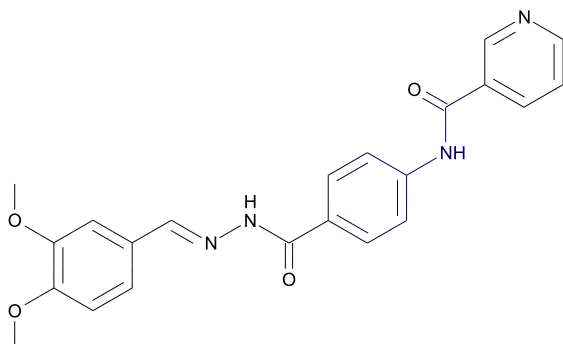
 $C_{22}H_{20}N_4O_4$ 

Molecular Weight: 404.4186

ALogP: 2.284

Rotatable Bonds: 7

Acceptors: 6

Donors: 2

## Model Prediction

Prediction: Non-Irritant

Probability: 0.931

Enrichment: 1.01

Bayesian Score: -2.31

Mahalanobis Distance: 6.34

Mahalanobis Distance p-value: 1

Prediction: Positive if the Bayesian score is above the estimated best cutoff value from minimizing the false positive and false negative rate.

Probability: The estimated probability that the sample is in the positive category. This assumes that the Bayesian score follows a normal distribution and is different from the prediction using a cutoff.

Enrichment: An estimate of enrichment, that is, the increased likelihood (versus random) of this sample being in the category.

Bayesian Score: The standard Laplacian-modified Bayesian score.

Mahalanobis Distance: The Mahalanobis distance (MD) is the distance to the center of the training data. The larger the MD, the less trustworthy the prediction.

Mahalanobis Distance p-value: The p-value gives the fraction of training data with an MD greater than or equal to the one for the given sample, assuming normally distributed data. The smaller the p-value, the less trustworthy the prediction. For highly non-normal X properties (e.g., fingerprints), the MD p-value is wildly inaccurate.

## Structural Similar Compounds

| Name               | Pregna-1,4-diene-3,20-dione, 21-(acetyloxy)-11-hydroxy-6-methyl-17- (1-oxopropoxy)-, (6- $\alpha$ ,11- $\beta$ )-                                                                | 2-Anthracenesulfonic acid, 1-amino-9,10-dihydro-9,10-dioxo-4-(2,4,6-trimethylanilino)-, monosodium salt                                            | Benzenesulfonamide, 4-amino-N-(5,6-dimethoxy-4-pyrimidinyl)- |
|--------------------|----------------------------------------------------------------------------------------------------------------------------------------------------------------------------------|----------------------------------------------------------------------------------------------------------------------------------------------------|--------------------------------------------------------------|
| Structure          |                                                                                                                                                                                  |                                                                                                                                                    |                                                              |
| Actual Endpoint    | Irritant                                                                                                                                                                         | Irritant                                                                                                                                           | Irritant                                                     |
| Predicted Endpoint | Irritant                                                                                                                                                                         | Non-Irritant                                                                                                                                       | Non-Irritant                                                 |
| Distance           | 0.724                                                                                                                                                                            | 0.778                                                                                                                                              | 0.800                                                        |
| Reference          | YACHDS Yakuri to Chiryo. Pharmacology and Therapeutics. (Raifu Saiensu Shup pan K.K., 2-5-13, Yaesu, Chuo-ku, Tokyo 104, Japan) V.1-1972- Volume(issue) /page/year: 19,3103,1991 | 85JCAE "Prehled Prumyslove Toxikologie; Organické Latky," Marhold, J., Prague, Czechoslovakia, Avicenum, 1986 Volume(issue)/page/year: -,1327,1986 | FCTXAV 14,307,76                                             |

## Model Applicability

Unknown features are fingerprint features in the query molecule, but not found or appearing too infrequently in the training set.

1. All properties and OPS components are within expected ranges.

## Feature Contribution

| Top features for positive contribution |            |                   |       |                          |
|----------------------------------------|------------|-------------------|-------|--------------------------|
| Fingerprint                            | Bit/Smiles | Feature Structure | Score | Irritant in training set |
|                                        |            |                   |       |                          |



| FCFP_12                                | -124655670  | 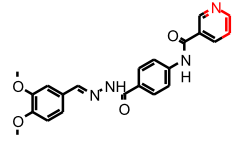<br>[*]:[cH]:[cH]:n:[*]                            | 0.0821 | 13 out of 13             |
|----------------------------------------|-------------|---------------------------------------------------------------------------------------------------------------------------------------|--------|--------------------------|
| FCFP_12                                | -2100785893 | <br>[*]\N=C\[c](:[*]):[*]                          | 0.081  | 11 out of 11             |
| FCFP_12                                | -1038421835 | <br>[*]O[c]1:[cH]:[c](C=[*]):[cH]:[cH]:[c]:1O<br>C | 0.0795 | 9 out of 9               |
| Top Features for negative contribution |             |                                                                                                                                       |        |                          |
| Fingerprint                            | Bit/Smiles  | Feature Structure                                                                                                                     | Score  | Irritant in training set |
| FCFP_12                                | -1838187238 | <br>[*]C(=[*])N[c]1:[cH]:[cH]:[*]:[cH]:[cH]:1    | -0.692 | 5 out of 12              |
| FCFP_12                                | 1294255210  | <br>[*]C(=[*])N[c](:[*]):[*]                     | -0.486 | 12 out of 22             |



|         |            |                                                                                                                                                                                        |        |              |
|---------|------------|----------------------------------------------------------------------------------------------------------------------------------------------------------------------------------------|--------|--------------|
| FCFP_12 | -773983804 | 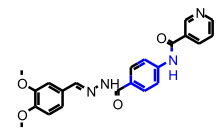<br><chem>Oc1cc(O)ccc1CNNC(=O)c2ccncc2c3ccncc3</chem><br>[*]N[c]1:[cH]:[*]:[c]<br>([*]):[cH]:[cH]:1 | -0.444 | 46 out of 79 |
|---------|------------|----------------------------------------------------------------------------------------------------------------------------------------------------------------------------------------|--------|--------------|



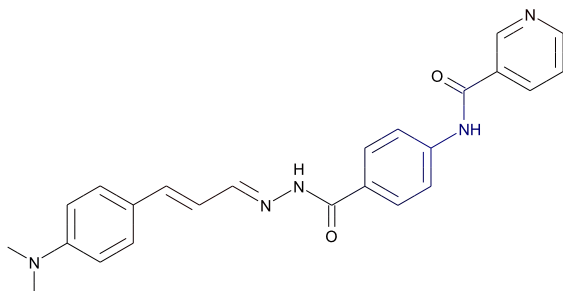

$C_{24}H_{23}N_5O_2$

Molecular Weight: 413.47172

ALogP: 2.839

Rotatable Bonds: 7

Acceptors: 5

Donors: 2

## Model Prediction

Prediction: Non-Irritant

Probability: 0.935

Enrichment: 1.02

Bayesian Score: -2.23

Mahalanobis Distance: 9.15

Mahalanobis Distance p-value: 0.346

Prediction: Positive if the Bayesian score is above the estimated best cutoff value from minimizing the false positive and false negative rate.

Probability: The estimated probability that the sample is in the positive category. This assumes that the Bayesian score follows a normal distribution and is different from the prediction using a cutoff.

Enrichment: An estimate of enrichment, that is, the increased likelihood (versus random) of this sample being in the category.

Bayesian Score: The standard Laplacian-modified Bayesian score.

Mahalanobis Distance: The Mahalanobis distance (MD) is the distance to the center of the training data. The larger the MD, the less trustworthy the prediction.

Mahalanobis Distance p-value: The p-value gives the fraction of training data with an MD greater than or equal to the one for the given sample, assuming normally distributed data. The smaller the p-value, the less trustworthy the prediction. For highly non-normal X properties (e.g., fingerprints), the MD p-value is wildly inaccurate.

## Structural Similar Compounds

| Name               | 5-Norbornene-2,3-dicarboxylic acid, 1,4,5,6,7,7-hexachloro-                                                                                       | 1-Piperazineacetic acid, 4-(2-hydroxyethyl)-alpha-phenyl-, 2,6-xylyl ester, monohydrochloride                                                                     | Pregna-1,4-diene-3,20-dione, 21-(acetyloxy)-11-hydroxy-6-methyl-17-(1-oxopropoxy)-, (6-alpha,11-beta)-                                                                          |
|--------------------|---------------------------------------------------------------------------------------------------------------------------------------------------|-------------------------------------------------------------------------------------------------------------------------------------------------------------------|---------------------------------------------------------------------------------------------------------------------------------------------------------------------------------|
| Structure          |                                                                                                                                                   |                                                                                                                                                                   |                                                                                                                                                                                 |
| Actual Endpoint    | Irritant                                                                                                                                          | Irritant                                                                                                                                                          | Irritant                                                                                                                                                                        |
| Predicted Endpoint | Irritant                                                                                                                                          | Irritant                                                                                                                                                          | Irritant                                                                                                                                                                        |
| Distance           | 0.756                                                                                                                                             | 0.788                                                                                                                                                             | 0.808                                                                                                                                                                           |
| Reference          | 85JCAE "Prehled Prumyslove Toxikologie; Organické Latky," Marhold, J., Prague, Czechoslovakia, Avicenum, 1986 Volume(issue)/page/year: -,581,1986 | BCFAAI Bollettino Chimico Farmaceutico. (Societa Editoriale Farmaceutica, Vi a Ausonio 12, 20123 Milan, Italy) V.33- 1894- Volume(issue)/page/year: 107,3 10,1968 | YACHDS Yakuri to Chiryo. Pharmacology and Therapeutics. (Raifu Saiensu Shup pan K.K., 2-5-13, Yaesu, Chuo-ku, Tokyo 104, Japan) V.1-1972- Volume(issue)/page/year: 19,3103,1991 |

## Model Applicability

Unknown features are fingerprint features in the query molecule, but not found or appearing too infrequently in the training set.

1. All properties and OPS components are within expected ranges.

## Feature Contribution

| Top features for positive contribution |            |                   |       |                          |
|----------------------------------------|------------|-------------------|-------|--------------------------|
| Fingerprint                            | Bit/Smiles | Feature Structure | Score | Irritant in training set |
|                                        |            |                   |       |                          |



|                                        |             |                                                                                                                                                   |        |                          |
|----------------------------------------|-------------|---------------------------------------------------------------------------------------------------------------------------------------------------|--------|--------------------------|
| FCFP_12                                | -2100309237 | 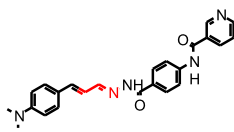<br><chem>[*]N=C\C=[*]</chem>                                  | 0.087  | 53 out of 53             |
| FCFP_12                                | -146015125  | <br><chem>[*]=C\C=C\c([cH]:[*])[cH]:[*]</chem>                 | 0.085  | 24 out of 24             |
| FCFP_12                                | 2011169140  | <br><chem>[*][c]1:[cH]:[cH]:[c](\C=C\C=[*]):[cH]:[cH]:1</chem> | 0.0829 | 15 out of 15             |
| Top Features for negative contribution |             |                                                                                                                                                   |        |                          |
| Fingerprint                            | Bit/Smiles  | Feature Structure                                                                                                                                 | Score  | Irritant in training set |
| FCFP_12                                | -1838187238 | <br><chem>[*]C(=[*])N[c]1:[cH]:[cH]:[*]:[cH]:[cH]:1</chem>   | -0.692 | 5 out of 12              |
| FCFP_12                                | 1294255210  | <br><chem>[*]C(=[*])N[c](:[*]):[*]</chem>                    | -0.486 | 12 out of 22             |



|         |            |                                                                                                                                   |        |              |
|---------|------------|-----------------------------------------------------------------------------------------------------------------------------------|--------|--------------|
| FCFP_12 | -773983804 | 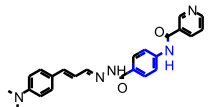<br>[*]N[c]1:[cH]:[*]:[c]<br>([*]):[cH]:[cH]:1 | -0.444 | 46 out of 79 |
|---------|------------|-----------------------------------------------------------------------------------------------------------------------------------|--------|--------------|



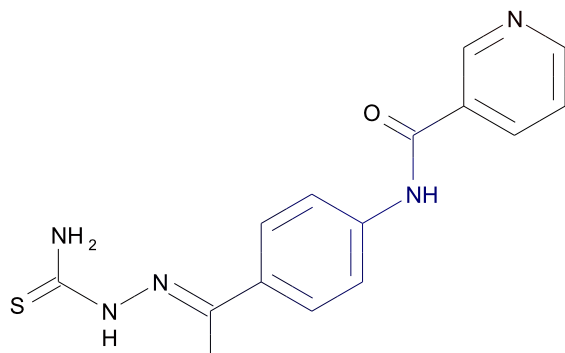

$C_{15}H_{15}N_5OS$

Molecular Weight: 313.3775

ALogP: 1.414

Rotatable Bonds: 5

Acceptors: 4

Donors: 3

## Model Prediction

Prediction: Non-Irritant

Probability: 0.89

Enrichment: 0.966

Bayesian Score: -2.86

Mahalanobis Distance: 6.86

Mahalanobis Distance p-value: 0.998

Prediction: Positive if the Bayesian score is above the estimated best cutoff value from minimizing the false positive and false negative rate.

Probability: The estimated probability that the sample is in the positive category. This assumes that the Bayesian score follows a normal distribution and is different from the prediction using a cutoff.

Enrichment: An estimate of enrichment, that is, the increased likelihood (versus random) of this sample being in the category.

Bayesian Score: The standard Laplacian-modified Bayesian score.

Mahalanobis Distance: The Mahalanobis distance (MD) is the distance to the center of the training data. The larger the MD, the less trustworthy the prediction.

Mahalanobis Distance p-value: The p-value gives the fraction of training data with an MD greater than or equal to the one for the given sample, assuming normally distributed data. The smaller the p-value, the less trustworthy the prediction. For highly non-normal X properties (e.g., fingerprints), the MD p-value is wildly inaccurate.

## Structural Similar Compounds

| Name               | o-Toluenesulfonamide, 4-amino-N-(2-hydroxyethyl)-                                                                                                  | 8-Methylamino-4-hydroxy-2-naphthalene sulfonic acid | C.I. Fluorescent Brightening Agent 24                                                                     |
|--------------------|----------------------------------------------------------------------------------------------------------------------------------------------------|-----------------------------------------------------|-----------------------------------------------------------------------------------------------------------|
| Structure          |                                                                                                                                                    |                                                     |                                                                                                           |
| Actual Endpoint    | Irritant                                                                                                                                           | Non-Irritant                                        | Irritant                                                                                                  |
| Predicted Endpoint | Non-Irritant                                                                                                                                       | Non-Irritant                                        | Non-Irritant                                                                                              |
| Distance           | 0.705                                                                                                                                              | 0.707                                               | 0.723                                                                                                     |
| Reference          | 85JCAE "Prehled Prumyslove Toxikologie; Organické Latky," Marhold, J., Prague, Czechoslovakia, Avicenum, 1986 Volume(issue)/page/year: -,1076,1986 | 28ZPAK -,190,72                                     | MVCRB3 MVC-Report. (Stockholm, Sweden) No.1-2, 1972-73. Discontinued. Volume(issue)/page/year: 2,193,1973 |

## Model Applicability

Unknown features are fingerprint features in the query molecule, but not found or appearing too infrequently in the training set.

1. All properties and OPS components are within expected ranges.

## Feature Contribution

### Top features for positive contribution

| Fingerprint | Bit/Smiles | Feature Structure | Score | Irritant in training set |
|-------------|------------|-------------------|-------|--------------------------|
|-------------|------------|-------------------|-------|--------------------------|



|                                        |             |                                                                                                                                       |        |                          |
|----------------------------------------|-------------|---------------------------------------------------------------------------------------------------------------------------------------|--------|--------------------------|
| FCFP_12                                | -124655670  | 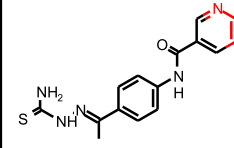<br>[*]:[cH]:[cH]:n:[*]                            | 0.0821 | 13 out of 13             |
| FCFP_12                                | -1695756380 | <br>[*]1:[cH]:[cH]:[cH]:n<br>:[cH]:1               | 0.0772 | 7 out of 7               |
| FCFP_12                                | 730557100   | <br>[*][c]1:[*]:n:[cH]:[c<br>H]:[cH]:1             | 0.0756 | 6 out of 6               |
| Top Features for negative contribution |             |                                                                                                                                       |        |                          |
| Fingerprint                            | Bit/Smiles  | Feature Structure                                                                                                                     | Score  | Irritant in training set |
| FCFP_12                                | -1838187238 | <br>[*]C(=[*])N[c]1:[cH]:<br>[cH]:[*]:[cH]:[cH]:1 | -0.692 | 5 out of 12              |
| FCFP_12                                | 1294255210  | <br>[*]C(=[*])N[c](:[*]):<br>[*]                 | -0.486 | 12 out of 22             |
|                                        |             |                                                                                                                                       |        |                          |



|         |            |                                                                                                                                                                                            |        |              |
|---------|------------|--------------------------------------------------------------------------------------------------------------------------------------------------------------------------------------------|--------|--------------|
| FCFP_12 | -773983804 | 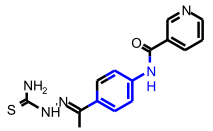<br><chem>*N[C@H](S)NC(=O)c1ccc(NC(=O)c2ccncc2)cc1</chem><br>[*]N[c]1:[cH]:[*]:[c]<br>([*]):[cH]:[cH]:1 | -0.444 | 46 out of 79 |
|---------|------------|--------------------------------------------------------------------------------------------------------------------------------------------------------------------------------------------|--------|--------------|



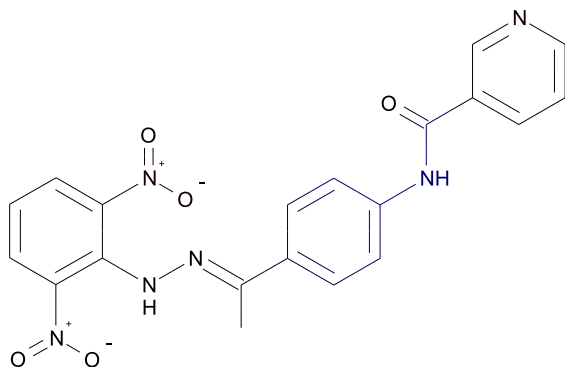
 $C_{20}H_{16}N_6O_5$ 

Molecular Weight: 420.37824

ALogP: 2.852

Rotatable Bonds: 7

Acceptors: 8

Donors: 2

## Model Prediction

Prediction: Non-Irritant

Probability: 0.932

Enrichment: 1.01

Bayesian Score: -2.3

Mahalanobis Distance: 6.31

Mahalanobis Distance p-value: 1

Prediction: Positive if the Bayesian score is above the estimated best cutoff value from minimizing the false positive and false negative rate.

Probability: The estimated probability that the sample is in the positive category. This assumes that the Bayesian score follows a normal distribution and is different from the prediction using a cutoff.

Enrichment: An estimate of enrichment, that is, the increased likelihood (versus random) of this sample being in the category.

Bayesian Score: The standard Laplacian-modified Bayesian score.

Mahalanobis Distance: The Mahalanobis distance (MD) is the distance to the center of the training data. The larger the MD, the less trustworthy the prediction.

Mahalanobis Distance p-value: The p-value gives the fraction of training data with an MD greater than or equal to the one for the given sample, assuming normally distributed data. The smaller the p-value, the less trustworthy the prediction. For highly non-normal X properties (e.g., fingerprints), the MD p-value is wildly inaccurate.

## Structural Similar Compounds

| Name               | 2,2'-Stilbenedisulfonic acid, 4,4'-dinitro-                                                                                                        | 2-Anthracenesulfonic acid, 1-amino-9,10-dihydro-9,10-dioxo-4-(2,4,6-trimethylanilino)-, monosodium salt                                            | Benzenesulfonamide, 4-amino-N-(5,6-dimethoxy-4-pyrimidinyl)- |
|--------------------|----------------------------------------------------------------------------------------------------------------------------------------------------|----------------------------------------------------------------------------------------------------------------------------------------------------|--------------------------------------------------------------|
| Structure          |                                                                                                                                                    |                                                                                                                                                    |                                                              |
| Actual Endpoint    | Irritant                                                                                                                                           | Irritant                                                                                                                                           | Irritant                                                     |
| Predicted Endpoint | Irritant                                                                                                                                           | Non-Irritant                                                                                                                                       | Non-Irritant                                                 |
| Distance           | 0.696                                                                                                                                              | 0.711                                                                                                                                              | 0.820                                                        |
| Reference          | 85JCAE "Prehled Prumyslove Toxikologie; Organické Latky," Marhold, J., Prague, Czechoslovakia, Avicenum, 1986 Volume(issue)/page/year: -,1062,1986 | 85JCAE "Prehled Prumyslove Toxikologie; Organické Latky," Marhold, J., Prague, Czechoslovakia, Avicenum, 1986 Volume(issue)/page/year: -,1327,1986 | FCTXAV 14,307,76                                             |

## Model Applicability

Unknown features are fingerprint features in the query molecule, but not found or appearing too infrequently in the training set.

1. All properties and OPS components are within expected ranges.

## Feature Contribution

### Top features for positive contribution

| Fingerprint | Bit/Smiles | Feature Structure | Score | Irritant in training set |
|-------------|------------|-------------------|-------|--------------------------|
|-------------|------------|-------------------|-------|--------------------------|



|                                        |             |                                                                                                                                         |        |                          |
|----------------------------------------|-------------|-----------------------------------------------------------------------------------------------------------------------------------------|--------|--------------------------|
| FCFP_12                                | 5           | 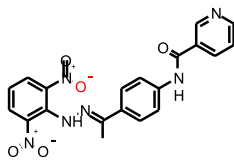<br>[*][O-]                                          | 0.0854 | 27 out of 27             |
| FCFP_12                                | 8           | <br>[*][N+](=[*])[*]                                 | 0.0843 | 20 out of 20             |
| FCFP_12                                | -124655670  | <br>[*]:[cH]:[cH]:n:[*]                              | 0.0821 | 13 out of 13             |
| Top Features for negative contribution |             |                                                                                                                                         |        |                          |
| Fingerprint                            | Bit/Smiles  | Feature Structure                                                                                                                       | Score  | Irritant in training set |
| FCFP_12                                | -1838187238 | <br>[*]C(=[*])N[c]1:[cH]:[cH]:[*]:[cH]:[cH]:[cH]:1 | -0.692 | 5 out of 12              |
| FCFP_12                                | 1294255210  | <br>[*]C(=[*])N[c](:[*]):[*]                       | -0.486 | 12 out of 22             |



|         |            |                                                                                                                                            |        |              |
|---------|------------|--------------------------------------------------------------------------------------------------------------------------------------------|--------|--------------|
| FCFP_12 | -773983804 | 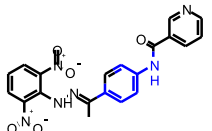<br><chem>[*]N[c]1:[cH]:[*]:[c]([*]):[cH]:[cH]:1</chem> | -0.444 | 46 out of 79 |
|---------|------------|--------------------------------------------------------------------------------------------------------------------------------------------|--------|--------------|



# Sorafenib

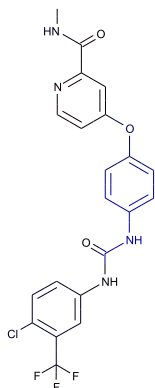

C<sub>21</sub>H<sub>16</sub>ClF<sub>3</sub>N<sub>4</sub>O<sub>3</sub>

Molecular Weight: 464.82494

ALogP: 4.175

Rotatable Bonds: 6

Acceptors: 4

Donors: 3

## Model Prediction

Prediction: Non-Irritant

Probability: 0.264

Enrichment: 0.287

Bayesian Score: -5.23

Mahalanobis Distance: 8.27

Mahalanobis Distance p-value: 0.791

Prediction: Positive if the Bayesian score is above the estimated best cutoff value from minimizing the false positive and false negative rate.

Probability: The estimated probability that the sample is in the positive category. This assumes that the Bayesian score follows a normal distribution and is different from the prediction using a cutoff.

Enrichment: An estimate of enrichment, that is, the increased likelihood (versus random) of this sample being in the category.

Bayesian Score: The standard Laplacian-modified Bayesian score.

Mahalanobis Distance: The Mahalanobis distance (MD) is the distance to the center of the training data. The larger the MD, the less trustworthy the prediction.

Mahalanobis Distance p-value: The p-value gives the fraction of training data with an MD greater than or equal to the one for the given sample, assuming normally distributed data. The smaller the p-value, the less trustworthy the prediction. For highly non-normal X properties (e.g., fingerprints), the MD p-value is wildly inaccurate.

# TOPKAT\_Skin\_Irritancy\_None\_vs\_Irritant

## Structural Similar Compounds

| Name               | 5-Norbornene-2,3-dicarboxylic acid, 1,4,5,6,7,7-hexachloro-                                                                                       | Benzenesulfonic acid, 2,2'-(4,4'-biphenylylene)di-, disodium salt                                         | Sulfide, bis(4-t-butyl-m-cresyl)-                                                                                                                                              |
|--------------------|---------------------------------------------------------------------------------------------------------------------------------------------------|-----------------------------------------------------------------------------------------------------------|--------------------------------------------------------------------------------------------------------------------------------------------------------------------------------|
| Structure          |                                                                                                                                                   |                                                                                                           |                                                                                                                                                                                |
| Actual Endpoint    | Irritant                                                                                                                                          | Irritant                                                                                                  | Irritant                                                                                                                                                                       |
| Predicted Endpoint | Irritant                                                                                                                                          | Non-Irritant                                                                                              | Irritant                                                                                                                                                                       |
| Distance           | 0.844                                                                                                                                             | 0.871                                                                                                     | 0.884                                                                                                                                                                          |
| Reference          | 85JCAE "Prehled Prumyslove Toxikologie; Organické Latky," Marhold, J., Prague, Czechoslovakia, Avicenum, 1986 Volume(issue)/page/year: -,581,1986 | MVCRB3 MVC-Report. (Stockholm, Sweden) No.1-2, 1972-73. Discontinued. Volume(issue)/page/year: 2,193,1973 | AMIHBC AMA Archives of Industrial Hygiene and Occupational Medicine. (Chicago, IL) V.2-10, 1950-54. For publisher information, see AEHLAU. Volume(issue)/page/year: 5,311,1952 |

## Model Applicability

Unknown features are fingerprint features in the query molecule, but not found or appearing too infrequently in the training set.

1. All properties and OPS components are within expected ranges.

## Feature Contribution

### Top features for positive contribution

| Fingerprint | Bit/Smiles | Feature Structure | Score | Irritant in training set |
|-------------|------------|-------------------|-------|--------------------------|
|-------------|------------|-------------------|-------|--------------------------|







|         |            |                                                                                                                                                          |        |              |
|---------|------------|----------------------------------------------------------------------------------------------------------------------------------------------------------|--------|--------------|
| FCFP_12 | 1294255210 | 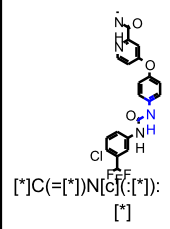 <p> [*]C(=[*])N(c1ccccc1O)N(c1ccc(Cl)cc1)N(c1ccc(Oc2ccccc2)cc1) </p> | -0.486 | 12 out of 22 |
|---------|------------|----------------------------------------------------------------------------------------------------------------------------------------------------------|--------|--------------|



7a

## TOPKAT\_Carcinogenic\_Potency\_TD50\_Mouse

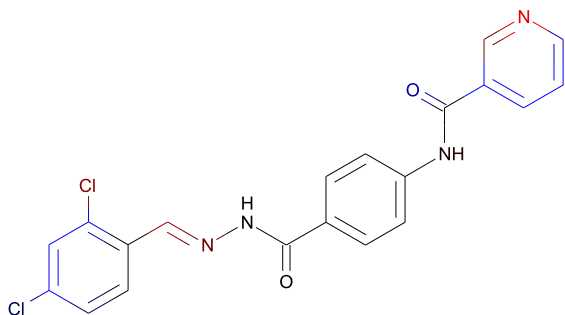C<sub>20</sub>H<sub>14</sub>Cl<sub>2</sub>N<sub>4</sub>O<sub>2</sub>

Molecular Weight: 413.25676

ALogP: 3.646

Rotatable Bonds: 5

Acceptors: 4

Donors: 2

**Model Prediction**

Prediction: 14.6

Unit: mg/kg\_body\_weight/day

Mahalanobis Distance: 12.9

Mahalanobis Distance p-value: 2.71e-007

Mahalanobis Distance: The Mahalanobis distance (MD) is a generalization of the Euclidean distance that accounts for correlations among the X properties. It is calculated as the distance to the center of the training data. The larger the MD, the less trustworthy the prediction.

Mahalanobis Distance p-value: The p-value gives the fraction of training data with an MD greater than or equal to the one for the given sample, assuming normally distributed data. The smaller the p-value, the less trustworthy the prediction. For highly non-normal X properties (e.g., fingerprints), the MD p-value is wildly inaccurate.

**Structural Similar Compounds**

| Name                        | 455     | 422     | Phenolphthalein |
|-----------------------------|---------|---------|-----------------|
| Structure                   |         |         |                 |
| Actual Endpoint (-log C)    | 3.87681 | 3.99565 | 2.43468         |
| Predicted Endpoint (-log C) | 3.77582 | 3.22211 | 3.66084         |
| Distance                    | 0.690   | 0.696   | 0.697           |
| Reference                   | CPDB    | CPDB    | CPDB            |

**Model Applicability**

Unknown features are fingerprint features in the query molecule, but not found or appearing too infrequently in the training set.

1. All properties and OPS components are within expected ranges.

**Feature Contribution****Top features for positive contribution**

| Fingerprint | Bit/Smiles | Feature Structure | Score |
|-------------|------------|-------------------|-------|
| ECFP_6      | 655739385  | <br>[*]:n:[*]     | 0.229 |



|                                        |                   |                                                                                                                                |              |
|----------------------------------------|-------------------|--------------------------------------------------------------------------------------------------------------------------------|--------------|
| ECFP_6                                 | -1925046727       | 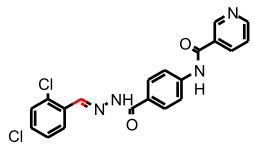<br><chem>[*]C=[*]</chem>                   | 0.145        |
| ECFP_6                                 | -817402818        | <br><chem>[*]Cl</chem>                      | 0.129        |
| Top Features for negative contribution |                   |                                                                                                                                |              |
| <b>Fingerprint</b>                     | <b>Bit/Smiles</b> | <b>Feature Structure</b>                                                                                                       | <b>Score</b> |
| ECFP_6                                 | 1996767644        | <br><chem>[*][c](:[*]):[cH]:[cH]:[*]</chem> | -0.251       |
| ECFP_6                                 | 642810091         | <br><chem>[*][c](:[*]):[*]</chem>         | -0.247       |
| ECFP_6                                 | -182236392        | <br><chem>[*]:[cH]:[*]</chem>             | -0.232       |







7b

## TOPKAT\_Carcinogenic\_Potency\_TD50\_Mouse

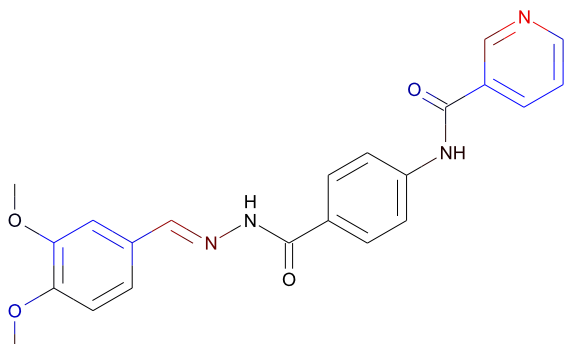C<sub>22</sub>H<sub>20</sub>N<sub>4</sub>O<sub>4</sub>

Molecular Weight: 404.4186

ALogP: 2.284

Rotatable Bonds: 7

Acceptors: 6

Donors: 2

**Model Prediction**

Prediction: 41.1

Unit: mg/kg\_body\_weight/day

Mahalanobis Distance: 11.9

Mahalanobis Distance p-value: 2.76e-005

Mahalanobis Distance: The Mahalanobis distance (MD) is a generalization of the Euclidean distance that accounts for correlations among the X properties. It is calculated as the distance to the center of the training data. The larger the MD, the less trustworthy the prediction.

Mahalanobis Distance p-value: The p-value gives the fraction of training data with an MD greater than or equal to the one for the given sample, assuming normally distributed data. The smaller the p-value, the less trustworthy the prediction. For highly non-normal X properties (e.g., fingerprints), the MD p-value is wildly inaccurate.

**Structural Similar Compounds**

| Name                        | 422     | 832     | Compound LY171883 |
|-----------------------------|---------|---------|-------------------|
| Structure                   |         |         |                   |
| Actual Endpoint (-log C)    | 3.99565 | 3.45372 | 3.45372           |
| Predicted Endpoint (-log C) | 3.22211 | 2.80429 | 2.84749           |
| Distance                    | 0.596   | 0.697   | 0.702             |
| Reference                   | CPDB    | CPDB    | CPDB              |

**Model Applicability**

Unknown features are fingerprint features in the query molecule, but not found or appearing too infrequently in the training set.

1. All properties and OPS components are within expected ranges.

**Feature Contribution****Top features for positive contribution**

| Fingerprint | Bit/Smiles | Feature Structure | Score |
|-------------|------------|-------------------|-------|
| ECFP_6      | 655739385  | <br>[*]:n:[*]     | 0.229 |



| ECFP_6                                 | -1925046727 | 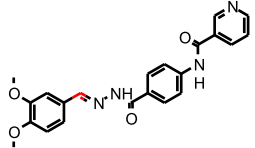<br><chem>[*]C=[*]</chem>                          | 0.145  |
|----------------------------------------|-------------|---------------------------------------------------------------------------------------------------------------------------------------|--------|
| ECFP_6                                 | -175146122  | <br><chem>[*]C(=[*])[c](:[cH]:[*]):[cH]:[*]</chem> | 0.107  |
| Top Features for negative contribution |             |                                                                                                                                       |        |
| Fingerprint                            | Bit/Smiles  | Feature Structure                                                                                                                     | Score  |
| ECFP_6                                 | 1996767644  | <br><chem>[*][c](:[*]):[cH]:[cH]:[*]</chem>        | -0.251 |
| ECFP_6                                 | 642810091   | <br><chem>[*][c](:[*]):[*]</chem>                | -0.247 |
| ECFP_6                                 | -182236392  | <br><chem>[*]:[cH]:[*]</chem>                    | -0.232 |







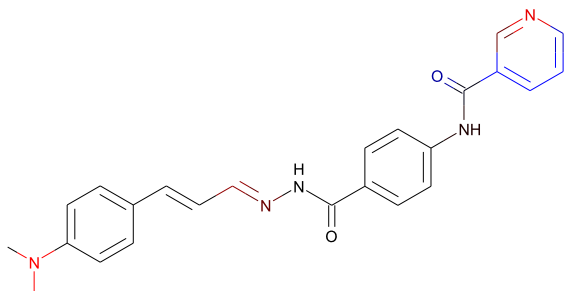

$C_{24}H_{23}N_5O_2$

Molecular Weight: 413.47172

ALogP: 2.839

Rotatable Bonds: 7

Acceptors: 5

Donors: 2

## Model Prediction

Prediction: 3.01

Unit: mg/kg\_body\_weight/day

Mahalanobis Distance: 11.7

Mahalanobis Distance p-value: 7.15e-005

Mahalanobis Distance: The Mahalanobis distance (MD) is a generalization of the Euclidean distance that accounts for correlations among the X properties. It is calculated as the distance to the center of the training data. The larger the MD, the less trustworthy the prediction.

Mahalanobis Distance p-value: The p-value gives the fraction of training data with an MD greater than or equal to the one for the given sample, assuming normally distributed data. The smaller the p-value, the less trustworthy the prediction. For highly non-normal X properties (e.g., fingerprints), the MD p-value is wildly inaccurate.

## Structural Similar Compounds

| Name                        | 422     | 455     | Compound LY171883 |
|-----------------------------|---------|---------|-------------------|
| Structure                   |         |         |                   |
| Actual Endpoint (-log C)    | 3.99565 | 3.87681 | 3.45372           |
| Predicted Endpoint (-log C) | 3.22211 | 3.77582 | 2.84749           |
| Distance                    | 0.704   | 0.720   | 0.733             |
| Reference                   | CPDB    | CPDB    | CPDB              |

## Model Applicability

Unknown features are fingerprint features in the query molecule, but not found or appearing too infrequently in the training set.

1. All properties and OPS components are within expected ranges.
2. Unknown ECFP\_2 feature: -984423246: [\*]N=C\[\*]

## Feature Contribution

### Top features for positive contribution

| Fingerprint | Bit/Smiles  | Feature Structure             | Score |
|-------------|-------------|-------------------------------|-------|
| ECFP_6      | -1072294614 | <br><chem>[*]N([*])[*]</chem> | 0.428 |



|                                        |            |                                                                                                                                |        |
|----------------------------------------|------------|--------------------------------------------------------------------------------------------------------------------------------|--------|
| ECFP_6                                 | 655739385  | 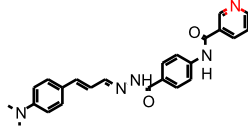<br><chem>[*]:n:[*]</chem>                  | 0.229  |
| ECFP_6                                 | 865379614  | <br><chem>[*]N([*])C</chem>                 | 0.219  |
| Top Features for negative contribution |            |                                                                                                                                |        |
| Fingerprint                            | Bit/Smiles | Feature Structure                                                                                                              | Score  |
| ECFP_6                                 | 1996767644 | <br><chem>[*][c](:[*]):[cH]:[cH]:[*]</chem> | -0.251 |
| ECFP_6                                 | 642810091  | <br><chem>[*][c](:[*]):[*]</chem>         | -0.247 |
| ECFP_6                                 | -182236392 | <br><chem>[*]:[cH]:[*]</chem>             | -0.232 |







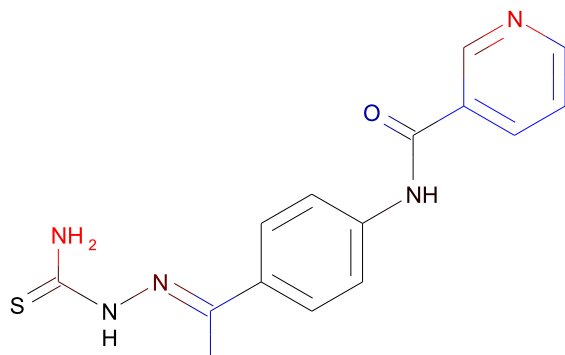

$C_{15}H_{15}N_5OS$

Molecular Weight: 313.3775

ALogP: 1.414

Rotatable Bonds: 5

Acceptors: 4

Donors: 3

## Model Prediction

Prediction: 38.5

Unit: mg/kg\_body\_weight/day

Mahalanobis Distance: 12.4

Mahalanobis Distance p-value: 3.58e-006

Mahalanobis Distance: The Mahalanobis distance (MD) is a generalization of the Euclidean distance that accounts for correlations among the X properties. It is calculated as the distance to the center of the training data. The larger the MD, the less trustworthy the prediction.

Mahalanobis Distance p-value: The p-value gives the fraction of training data with an MD greater than or equal to the one for the given sample, assuming normally distributed data. The smaller the p-value, the less trustworthy the prediction. For highly non-normal X properties (e.g., fingerprints), the MD p-value is wildly inaccurate.

## Structural Similar Compounds

| Name                        | Furosemide | Formic acid 2-[4-(5-nitro-2-furyl)-2-thiazolyl]hydrazide s | Sulfamethazine |
|-----------------------------|------------|------------------------------------------------------------|----------------|
| Structure                   |            |                                                            |                |
| Actual Endpoint (-log C)    | 2.65498    | 4.37179                                                    | 2.26558        |
| Predicted Endpoint (-log C) | 3.60472    | 4.32851                                                    | 3.67808        |
| Distance                    | 0.539      | 0.642                                                      | 0.653          |
| Reference                   | CPDB       | CPDB                                                       | CPDB           |

## Model Applicability

Unknown features are fingerprint features in the query molecule, but not found or appearing too infrequently in the training set.

1. All properties and OPS components are within expected ranges.
2. Unknown ECFP\_2 feature: 128986386: [\*]N=C(/C)[c](:[\*]):[\*]
3. Unknown ECFP\_2 feature: 560380707: [\*]NN=C([\*])[\*]
4. Unknown ECFP\_2 feature: -571028867: [\*]NC(=S)N

## Feature Contribution

| Top features for positive contribution |            |                            |       |
|----------------------------------------|------------|----------------------------|-------|
| Fingerprint                            | Bit/Smiles | Feature Structure          | Score |
| ECFP_6                                 | 655739385  | <br><chem>[*]:n:[*]</chem> | 0.229 |



|                                        |            |                                                                                                                                       |        |
|----------------------------------------|------------|---------------------------------------------------------------------------------------------------------------------------------------|--------|
| ECFP_6                                 | 1572579716 | 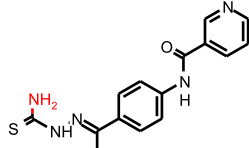<br><chem>[*]N</chem>                              | 0.225  |
| ECFP_6                                 | -175146122 | <br><chem>[*]C(=[*])[c](:[cH]:[*]):[cH]:[*]</chem> | 0.107  |
| Top Features for negative contribution |            |                                                                                                                                       |        |
| Fingerprint                            | Bit/Smiles | Feature Structure                                                                                                                     | Score  |
| ECFP_6                                 | 1996767644 | <br><chem>[*][c](:[*]):[cH]:[cH]:[*]</chem>        | -0.251 |
| ECFP_6                                 | 642810091  | <br><chem>[*][c](:[*]):[*]</chem>                | -0.247 |
| ECFP_6                                 | -182236392 | <br><chem>[*]:[cH]:[*]</chem>                    | -0.232 |







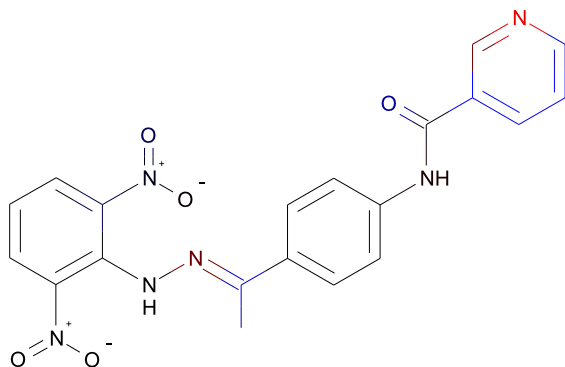
 $C_{20}H_{16}N_6O_5$ 

Molecular Weight: 420.37824

ALogP: 2.852

Rotatable Bonds: 7

Acceptors: 8

Donors: 2

## Model Prediction

Prediction: 33.1

Unit: mg/kg\_body\_weight/day

Mahalanobis Distance: 12.1

Mahalanobis Distance p-value: 1.46e-005

Mahalanobis Distance: The Mahalanobis distance (MD) is a generalization of the Euclidean distance that accounts for correlations among the X properties. It is calculated as the distance to the center of the training data. The larger the MD, the less trustworthy the prediction.

Mahalanobis Distance p-value: The p-value gives the fraction of training data with an MD greater than or equal to the one for the given sample, assuming normally distributed data. The smaller the p-value, the less trustworthy the prediction. For highly non-normal X properties (e.g., fingerprints), the MD p-value is wildly inaccurate.

## Structural Similar Compounds

| Name                        | Salicylazosulfapyridine | 470     | 420     |
|-----------------------------|-------------------------|---------|---------|
| Structure                   |                         |         |         |
| Actual Endpoint (-log C)    | 2.5034                  | 4.62839 | 2.78302 |
| Predicted Endpoint (-log C) | 3.54214                 | 3.93264 | 3.31546 |
| Distance                    | 0.663                   | 0.745   | 0.765   |
| Reference                   | CPDB                    | CPDB    | CPDB    |

## Model Applicability

Unknown features are fingerprint features in the query molecule, but not found or appearing too infrequently in the training set.

1. All properties and OPS components are within expected ranges.
2. Unknown ECFP\_2 feature: 128986386: [\*]\N=C(/C)\[c](:[\*]):[\*]
3. Unknown ECFP\_2 feature: 560380707: [\*]NN=C([\*])[\*]
4. Unknown ECFP\_2 feature: -1660205591: [\*]N[c](:[c]([\*]):[\*]):[c]([\*]):[\*]

## Feature Contribution

### Top features for positive contribution

| Fingerprint | Bit/Smiles | Feature Structure | Score |
|-------------|------------|-------------------|-------|
| ECFP_6      | 655739385  | <br>[*]:n:[*]     | 0.229 |



|                                        |             |                                                                                                                                            |        |
|----------------------------------------|-------------|--------------------------------------------------------------------------------------------------------------------------------------------|--------|
| ECFP_6                                 | -175146122  | 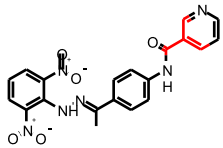<br><chem>[*]C(=[*])[c](:[cH]:[<br/>*]):[cH]:[*]</chem> | 0.107  |
| ECFP_6                                 | -1087070950 | <br><chem>[*]N=[*]</chem>                               | 0.104  |
| Top Features for negative contribution |             |                                                                                                                                            |        |
| Fingerprint                            | Bit/Smiles  | Feature Structure                                                                                                                          | Score  |
| ECFP_6                                 | 1996767644  | <br><chem>[*][c](:[*]):[cH]:[cH<br/>]:[*]</chem>        | -0.251 |
| ECFP_6                                 | 642810091   | <br><chem>[*][c](:[*]):[*]</chem>                     | -0.247 |
| ECFP_6                                 | -182236392  | <br><chem>[*]:[cH]:[*]</chem>                         | -0.232 |







# Sorafenib

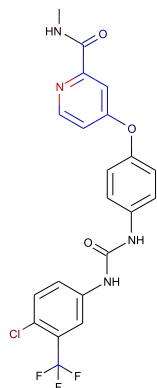

$C_{21}H_{16}ClF_3N_4O_3$

Molecular Weight: 464.82494

ALogP: 4.175

Rotatable Bonds: 6

Acceptors: 4

Donors: 3

## Model Prediction

Prediction: 19.2

Unit: mg/kg\_body\_weight/day

Mahalanobis Distance: 12.4

Mahalanobis Distance p-value: 2.94e-006

Mahalanobis Distance: The Mahalanobis distance (MD) is a generalization of the Euclidean distance that accounts for correlations among the X properties. It is calculated as the distance to the center of the training data. The larger the MD, the less trustworthy the prediction.

Mahalanobis Distance p-value: The p-value gives the fraction of training data with an MD greater than or equal to the one for the given sample, assuming normally distributed data. The smaller the p-value, the less trustworthy the prediction. For highly non-normal X properties (e.g., fingerprints), the MD p-value is wildly inaccurate.

# TOPKAT\_Carcinogenic\_Potency\_TD50\_Mouse

## Structural Similar Compounds

| Name                        | Ochratoxin A | 542     | 4-Chloro-6-(2,3-xylidino)-2-pyridylthio(N-b-hydroxy-ethyl) acetamide |
|-----------------------------|--------------|---------|----------------------------------------------------------------------|
| Structure                   |              |         |                                                                      |
| Actual Endpoint (-log C)    | 4.79932      | 4.79932 | 3.91517                                                              |
| Predicted Endpoint (-log C) | 3.6353       | 3.6353  | 3.92186                                                              |
| Distance                    | 0.718        | 0.718   | 0.738                                                                |
| Reference                   | CPDB         | CPDB    | CPDB                                                                 |

## Model Applicability

Unknown features are fingerprint features in the query molecule, but not found or appearing too infrequently in the training set.

1. All properties and OPS components are within expected ranges.
2. Unknown ECFP\_2 feature: 1413420509: [\*]C(=[\*])[c]([n:[\*]):c:[\*]
3. Unknown ECFP\_2 feature: 1338334141: [\*]C(=[\*])NC

## Feature Contribution

| Top features for positive contribution |            |                   |       |
|----------------------------------------|------------|-------------------|-------|
| Fingerprint                            | Bit/Smiles | Feature Structure | Score |
| ECFP_6                                 | 655739385  | <br>[*]:n:[*]     | 0.229 |



|                                        |            |                                                                                                                    |        |
|----------------------------------------|------------|--------------------------------------------------------------------------------------------------------------------|--------|
| ECFP_6                                 | -817402818 | 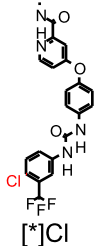<br>[*]Cl                       | 0.129  |
| ECFP_6                                 | -176455838 | <br>[*]O[c](:[cH]:[*]):[cH]:[*] | 0.0818 |
| Top Features for negative contribution |            |                                                                                                                    |        |
| Fingerprint                            | Bit/Smiles | Feature Structure                                                                                                  | Score  |
| ECFP_6                                 | 1996767644 | <br>[*][c](:[*]):[cH]:[cH]:[*]  | -0.251 |
| ECFP_6                                 | 642810091  | <br>[*][c](:[*]):[*]          | -0.247 |
| ECFP_6                                 | -182236392 | <br>[*]:[cH]:[*]              | -0.232 |







7a

## TOPKAT\_Carcinogenic\_Potency\_TD50\_Rat

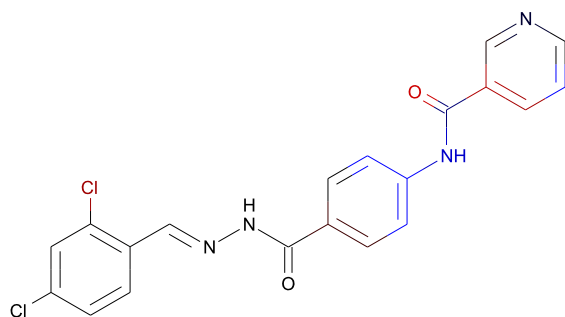
 $C_{20}H_{14}Cl_2N_4O_2$ 

Molecular Weight: 413.25676

ALogP: 3.646

Rotatable Bonds: 5

Acceptors: 4

Donors: 2

**Model Prediction**

Prediction: 11.3

Unit: mg/kg\_body\_weight/day

Mahalanobis Distance: 11.9

Mahalanobis Distance p-value: 0.000962

Mahalanobis Distance: The Mahalanobis distance (MD) is a generalization of the Euclidean distance that accounts for correlations among the X properties. It is calculated as the distance to the center of the training data. The larger the MD, the less trustworthy the prediction.

Mahalanobis Distance p-value: The p-value gives the fraction of training data with an MD greater than or equal to the one for the given sample, assuming normally distributed data. The smaller the p-value, the less trustworthy the prediction. For highly non-normal X properties (e.g., fingerprints), the MD p-value is wildly inaccurate.

**Structural Similar Compounds**

| Name                        | Indomethacin | 3-(Cyclopentyloxy)-N-(3,5-di-chloro-4-pyridyl)-4-methoxy-benzamide | Omeprazole |
|-----------------------------|--------------|--------------------------------------------------------------------|------------|
| Structure                   |              |                                                                    |            |
| Actual Endpoint (-log C)    | 5.49293      | 5.39369                                                            | 3.4628     |
| Predicted Endpoint (-log C) | 4.9569       | 4.27874                                                            | 4.7324     |
| Distance                    | 0.590        | 0.594                                                              | 0.622      |
| Reference                   | CPDB         | CPDB                                                               | CPDB       |

**Model Applicability**

Unknown features are fingerprint features in the query molecule, but not found or appearing too infrequently in the training set.

- OPS PC6 out of range. Value: 6.7455. Training min, max, SD, explained variance: -5.5832, 6.4847, 1.973, 0.0374.

**Feature Contribution****Top features for positive contribution**

| Fingerprint | Bit/Smiles | Feature Structure | Score |
|-------------|------------|-------------------|-------|
| FCFP_6      | 1          | <p>[*]=O</p>      | 0.234 |



|                                        |            |                                                                                                                       |        |
|----------------------------------------|------------|-----------------------------------------------------------------------------------------------------------------------|--------|
| FCFP_6                                 | 32         | 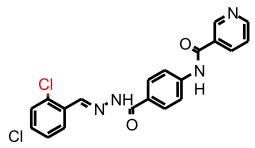<br>[*]Cl                          | 0.154  |
| FCFP_6                                 | 730557100  | <br>[*][c]1:[*]:n:[cH]:[cH]:[cH]:1 | 0.141  |
| Top Features for negative contribution |            |                                                                                                                       |        |
| Fingerprint                            | Bit/Smiles | Feature Structure                                                                                                     | Score  |
| FCFP_6                                 | 16         | <br>[*]:[cH]:[*]                   | -0.354 |
| FCFP_6                                 | 590925877  | <br>[*]N[c](:[cH]:[*]):[cH]:[*]  | -0.323 |
| FCFP_6                                 | 17         | <br>[*]:n:[*]                    | -0.149 |







7b

TOPKAT\_Carcinogenic\_Potency\_TD50\_Rat

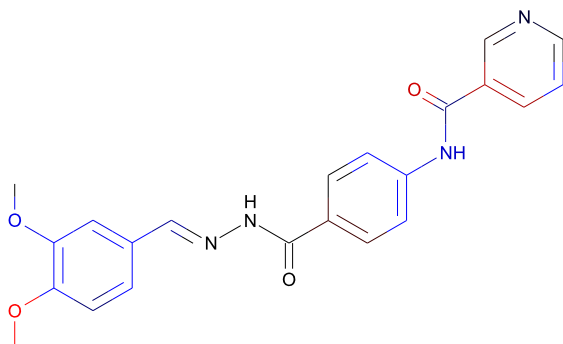C<sub>22</sub>H<sub>20</sub>N<sub>4</sub>O<sub>4</sub>

Molecular Weight: 404.4186

ALogP: 2.284

Rotatable Bonds: 7

Acceptors: 6

Donors: 2

## Model Prediction

Prediction: 10.9

Unit: mg/kg\_body\_weight/day

Mahalanobis Distance: 13.7

Mahalanobis Distance p-value: 1.54e-007

Mahalanobis Distance: The Mahalanobis distance (MD) is a generalization of the Euclidean distance that accounts for correlations among the X properties. It is calculated as the distance to the center of the training data. The larger the MD, the less trustworthy the prediction.

Mahalanobis Distance p-value: The p-value gives the fraction of training data with an MD greater than or equal to the one for the given sample, assuming normally distributed data. The smaller the p-value, the less trustworthy the prediction. For highly non-normal X properties (e.g., fingerprints), the MD p-value is wildly inaccurate.

## Structural Similar Compounds

| Name                        | Loxidine | Omeprazole | C.I. direct brown 95 |
|-----------------------------|----------|------------|----------------------|
| Structure                   |          |            |                      |
| Actual Endpoint (-log C)    | 2.87532  | 3.4628     | 5.31387              |
| Predicted Endpoint (-log C) | 3.63996  | 4.7324     | 4.30266              |
| Distance                    | 0.632    | 0.639      | 0.658                |
| Reference                   | CPDB     | CPDB       | CPDB                 |

## Model Applicability

Unknown features are fingerprint features in the query molecule, but not found or appearing too infrequently in the training set.

1. All properties and OPS components are within expected ranges.

## Feature Contribution

### Top features for positive contribution

| Fingerprint | Bit/Smiles | Feature Structure | Score |
|-------------|------------|-------------------|-------|
| FCFP_6      | 136627117  | <p>[*]OC</p>      | 0.69  |



|                                        |            |                                                                                                                                           |        |
|----------------------------------------|------------|-------------------------------------------------------------------------------------------------------------------------------------------|--------|
| FCFP_6                                 | 1          | 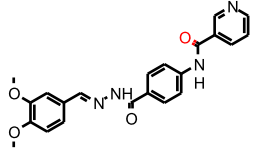<br><chem>[*]=O</chem>                                 | 0.234  |
| FCFP_6                                 | 730557100  | <br><chem>[*][c]1:[*]:n:[cH]:[cH]:[cH]:1</chem>        | 0.141  |
| Top Features for negative contribution |            |                                                                                                                                           |        |
| Fingerprint                            | Bit/Smiles | Feature Structure                                                                                                                         | Score  |
| FCFP_6                                 | 16         | <br><chem>[*]:[cH]:[*]</chem>                          | -0.354 |
| FCFP_6                                 | 590925877  | <br><chem>[*]N[c](:[cH]:[*]):[cH]:[*]</chem>         | -0.323 |
| FCFP_6                                 | 1674451008 | <br><chem>[*]O[c]1:[cH]:[cH]:[cH]:[cH]:[cH]:1</chem> | -0.233 |







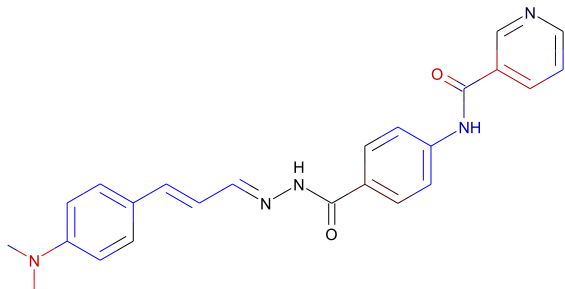
 $C_{24}H_{23}N_5O_2$ 

Molecular Weight: 413.47172

ALogP: 2.839

Rotatable Bonds: 7

Acceptors: 5

Donors: 2

## Model Prediction

Prediction: 29.1

Unit: mg/kg\_body\_weight/day

Mahalanobis Distance: 13.4

Mahalanobis Distance p-value: 6.93e-007

Mahalanobis Distance: The Mahalanobis distance (MD) is a generalization of the Euclidean distance that accounts for correlations among the X properties. It is calculated as the distance to the center of the training data. The larger the MD, the less trustworthy the prediction.

Mahalanobis Distance p-value: The p-value gives the fraction of training data with an MD greater than or equal to the one for the given sample, assuming normally distributed data. The smaller the p-value, the less trustworthy the prediction. For highly non-normal X properties (e.g., fingerprints), the MD p-value is wildly inaccurate.

## Structural Similar Compounds

| Name                        | Omeprazole | Loxidine | 3-(Cyclopentyloxy)-N-(3,5-di-chloro-4-pyridyl)-4-methoxy-benzamide |
|-----------------------------|------------|----------|--------------------------------------------------------------------|
| Structure                   |            |          |                                                                    |
| Actual Endpoint (-log C)    | 3.4628     | 2.87532  | 5.39369                                                            |
| Predicted Endpoint (-log C) | 4.7324     | 3.63996  | 4.27874                                                            |
| Distance                    | 0.641      | 0.644    | 0.659                                                              |
| Reference                   | CPDB       | CPDB     | CPDB                                                               |

## Model Applicability

Unknown features are fingerprint features in the query molecule, but not found or appearing too infrequently in the training set.

1. All properties and OPS components are within expected ranges.

## Feature Contribution

| Top features for positive contribution |            |                   |       |
|----------------------------------------|------------|-------------------|-------|
| Fingerprint                            | Bit/Smiles | Feature Structure | Score |
| FCFP_6                                 | 136627117  | <p>[*]OC</p>      | 0.69  |



|                                        |            |                                                                                                                           |        |
|----------------------------------------|------------|---------------------------------------------------------------------------------------------------------------------------|--------|
| FCFP_6                                 | 1          | 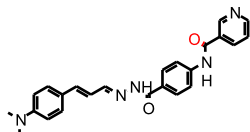 <p>[*]=O</p>                          | 0.234  |
| FCFP_6                                 | 730557100  |  <p>[*][c]1:[*]:n:[cH]:[cH]:[cH]:1</p> | 0.141  |
| Top Features for negative contribution |            |                                                                                                                           |        |
| Fingerprint                            | Bit/Smiles | Feature Structure                                                                                                         | Score  |
| FCFP_6                                 | 451847724  |  <p>[*]\C=C\[*]</p>                    | -0.436 |
| FCFP_6                                 | 16         |  <p>[*]:[cH]:[*]</p>                 | -0.354 |
| FCFP_6                                 | 590925877  |  <p>[*]N[c](:[cH]:[*]):[cH]:[*]</p>  | -0.323 |







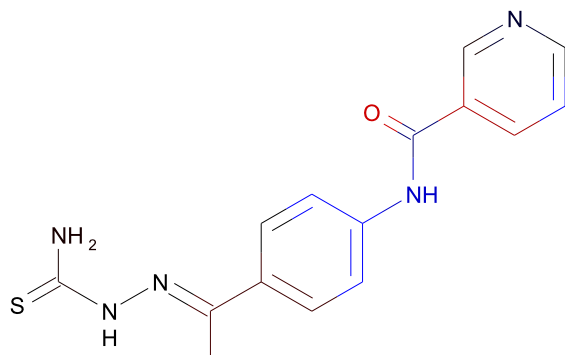

$C_{15}H_{15}N_5OS$

Molecular Weight: 313.3775

ALogP: 1.414

Rotatable Bonds: 5

Acceptors: 4

Donors: 3

## Model Prediction

Prediction: 71.8

Unit: mg/kg\_body\_weight/day

Mahalanobis Distance: 11.6

Mahalanobis Distance p-value: 0.00256

Mahalanobis Distance: The Mahalanobis distance (MD) is a generalization of the Euclidean distance that accounts for correlations among the X properties. It is calculated as the distance to the center of the training data. The larger the MD, the less trustworthy the prediction.

Mahalanobis Distance p-value: The p-value gives the fraction of training data with an MD greater than or equal to the one for the given sample, assuming normally distributed data. The smaller the p-value, the less trustworthy the prediction. For highly non-normal X properties (e.g., fingerprints), the MD p-value is wildly inaccurate.

## Structural Similar Compounds

| Name                        | 4,4'-Sulfonylbisacetanilide | 1,2-Dihydro-2-(5-nitro-2-thi-enyl) quinazolin-4(3H)-one | Formic acid 2-[4-(5-nitro-2-furyl)-2-thiazolyl]hydrazide s |
|-----------------------------|-----------------------------|---------------------------------------------------------|------------------------------------------------------------|
| Structure                   |                             |                                                         |                                                            |
| Actual Endpoint (-log C)    | 3.77655                     | 5.25509                                                 | 4.70106                                                    |
| Predicted Endpoint (-log C) | 3.55337                     | 3.89291                                                 | 4.66041                                                    |
| Distance                    | 0.541                       | 0.639                                                   | 0.641                                                      |
| Reference                   | CPDB                        | CPDB                                                    | CPDB                                                       |

## Model Applicability

Unknown features are fingerprint features in the query molecule, but not found or appearing too infrequently in the training set.

1. All properties and OPS components are within expected ranges.

## Feature Contribution

| Top features for positive contribution |            |                   |       |
|----------------------------------------|------------|-------------------|-------|
| Fingerprint                            | Bit/Smiles | Feature Structure | Score |
| FCFP_6                                 | 1          | <p>[*]=O</p>      | 0.234 |



|                                        |            |                                                                                                                          |        |
|----------------------------------------|------------|--------------------------------------------------------------------------------------------------------------------------|--------|
| FCFP_6                                 | 730557100  | 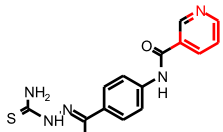<br>[*][c]1:[*]:n:[cH]:[cH]:[cH]:1    | 0.141  |
| FCFP_6                                 | 203677720  | <br>[*]C(=[*])[c](:[cH]:[*]):[cH]:[*] | 0.137  |
| Top Features for negative contribution |            |                                                                                                                          |        |
| Fingerprint                            | Bit/Smiles | Feature Structure                                                                                                        | Score  |
| FCFP_6                                 | 16         | <br>[*]:[cH]:[*]                      | -0.354 |
| FCFP_6                                 | 590925877  | <br>[*]N[c](:[cH]:[*]):[cH]:[*]     | -0.323 |
| FCFP_6                                 | 17         | <br>[*]:n:[*]                       | -0.149 |







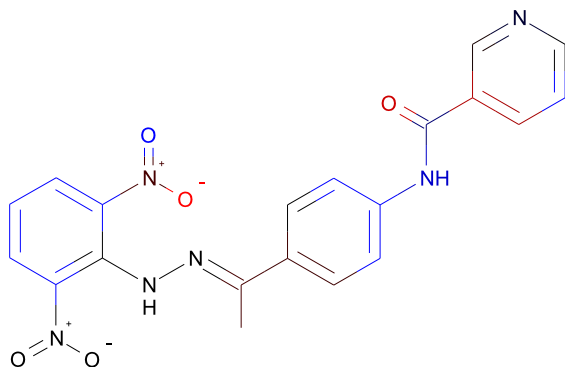
 $C_{20}H_{16}N_6O_5$ 

Molecular Weight: 420.37824

ALogP: 2.852

Rotatable Bonds: 7

Acceptors: 8

Donors: 2

## Model Prediction

Prediction: 23

Unit: mg/kg\_body\_weight/day

Mahalanobis Distance: 12.9

Mahalanobis Distance p-value: 6.99e-006

Mahalanobis Distance: The Mahalanobis distance (MD) is a generalization of the Euclidean distance that accounts for correlations among the X properties. It is calculated as the distance to the center of the training data. The larger the MD, the less trustworthy the prediction.

Mahalanobis Distance p-value: The p-value gives the fraction of training data with an MD greater than or equal to the one for the given sample, assuming normally distributed data. The smaller the p-value, the less trustworthy the prediction. For highly non-normal X properties (e.g., fingerprints), the MD p-value is wildly inaccurate.

## Structural Similar Compounds

| Name                        | 623     | Salicylazosulfapyridine | 4-Bis(2-hydroxyethyl)amino-2-(5-nitro-2-thienyl)quinazoline |
|-----------------------------|---------|-------------------------|-------------------------------------------------------------|
| Structure                   |         |                         |                                                             |
| Actual Endpoint (-log C)    | 2.39985 | 2.39891                 | 5.05984                                                     |
| Predicted Endpoint (-log C) | 3.4177  | 3.17598                 | 4.23808                                                     |
| Distance                    | 0.531   | 0.617                   | 0.625                                                       |
| Reference                   | CPDB    | CPDB                    | CPDB                                                        |

## Model Applicability

Unknown features are fingerprint features in the query molecule, but not found or appearing too infrequently in the training set.

- OPS PC24 out of range. Value: -3.3209. Training min, max, SD, explained variance: -3.0088, 7.4204, 1.076, 0.0111.

## Feature Contribution

### Top features for positive contribution

| Fingerprint | Bit/Smiles | Feature Structure | Score |
|-------------|------------|-------------------|-------|
| FCFP_6      | 5          |                   | 0.431 |



|                                        |            |                                                                                                                                           |        |
|----------------------------------------|------------|-------------------------------------------------------------------------------------------------------------------------------------------|--------|
| FCFP_6                                 | 8          | 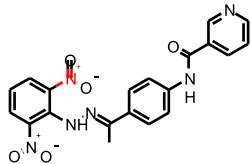<br><chem>[*][N+](=[*])[*]</chem>                      | 0.336  |
| FCFP_6                                 | 1          | <br><chem>[*]=O</chem>                                 | 0.234  |
| Top Features for negative contribution |            |                                                                                                                                           |        |
| Fingerprint                            | Bit/Smiles | Feature Structure                                                                                                                         | Score  |
| FCFP_6                                 | 991735244  | <br><chem>[*][c]1:[*]:[c]([*]):[cH]:[cH]:[cH]:1</chem> | -0.422 |
| FCFP_6                                 | 16         | <br><chem>[*]:[cH]:[*]</chem>                        | -0.354 |
| FCFP_6                                 | 590925877  | <br><chem>[*]N[c](:[cH]:[*]):[cH]:[*]</chem>         | -0.323 |







# Sorafenib

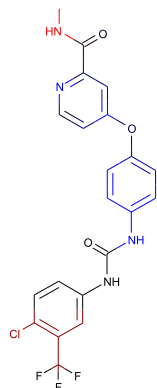

$C_{21}H_{16}ClF_3N_4O_3$

Molecular Weight: 464.82494

ALogP: 4.175

Rotatable Bonds: 6

Acceptors: 4

Donors: 3

## Model Prediction

Prediction: 14.2

Unit: mg/kg\_body\_weight/day

Mahalanobis Distance: 20.4

Mahalanobis Distance p-value: 9.56e-031

Mahalanobis Distance: The Mahalanobis distance (MD) is a generalization of the Euclidean distance that accounts for correlations among the X properties. It is calculated as the distance to the center of the training data. The larger the MD, the less trustworthy the prediction.

Mahalanobis Distance p-value: The p-value gives the fraction of training data with an MD greater than or equal to the one for the given sample, assuming normally distributed data. The smaller the p-value, the less trustworthy the prediction. For highly non-normal X properties (e.g., fingerprints), the MD p-value is wildly inaccurate.

# TOPKAT\_Carcinogenic\_Potency\_TD50\_Rat

## Structural Similar Compounds

| Name                        | Fluvastatin | 913     | Ochratoxin A |
|-----------------------------|-------------|---------|--------------|
| Structure                   |             |         |              |
| Actual Endpoint (-log C)    | 3.51742     | 3.51742 | 6.47264      |
| Predicted Endpoint (-log C) | 5.41573     | 5.41573 | 5.06501      |
| Distance                    | 0.597       | 0.597   | 0.666        |
| Reference                   | CPDB        | CPDB    | CPDB         |

## Model Applicability

Unknown features are fingerprint features in the query molecule, but not found or appearing too infrequently in the training set.

1. All properties and OPS components are within expected ranges.
2. Unknown FCFP\_2 feature: -1029533685: [\*]:[c](:[\*])C(F)(F)F

## Feature Contribution

### Top features for positive contribution

| Fingerprint | Bit/Smiles | Feature Structure | Score |
|-------------|------------|-------------------|-------|
| FCFP_6      | 1          |                   | 0.234 |



|                                        |            |                                                                                                                                    |        |
|----------------------------------------|------------|------------------------------------------------------------------------------------------------------------------------------------|--------|
| FCFP_6                                 | -885550502 | 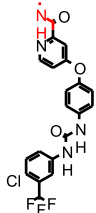<br>[*]C(=[*])NC                                | 0.229  |
| FCFP_6                                 | 32         | <br>[*]Cl                                       | 0.154  |
| Top Features for negative contribution |            |                                                                                                                                    |        |
| Fingerprint                            | Bit/Smiles | Feature Structure                                                                                                                  | Score  |
| FCFP_6                                 | 16         | <br>[*]:[cH]:[*]                                | -0.354 |
| FCFP_6                                 | 590925877  | <br>[*]N[c](:[cH]:[*]):[cH]:[*]               | -0.323 |
| FCFP_6                                 | 1674451008 | <br>[*]O[c]1:[cH]:[cH]:[c]1([*]):[*]:[c]:1[*] | -0.233 |







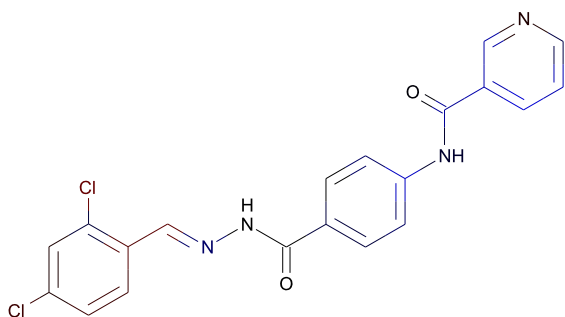

$C_{20}H_{14}Cl_2N_4O_2$

Molecular Weight: 413.25676

ALogP: 3.646

Rotatable Bonds: 5

Acceptors: 4

Donors: 2

## Model Prediction

Prediction: 0.12

Unit: g/kg\_body\_weight

Mahalanobis Distance: 28

Mahalanobis Distance p-value: 4.66e-021

Mahalanobis Distance: The Mahalanobis distance (MD) is a generalization of the Euclidean distance that accounts for correlations among the X properties. It is calculated as the distance to the center of the training data. The larger the MD, the less trustworthy the prediction.

Mahalanobis Distance p-value: The p-value gives the fraction of training data with an MD greater than or equal to the one for the given sample, assuming normally distributed data. The smaller the p-value, the less trustworthy the prediction. For highly non-normal X properties (e.g., fingerprints), the MD p-value is wildly inaccurate.

## Structural Similar Compounds

| Name                        | D & C RED 9      | SODIUM ACIFLUORFEN              | ISOXABEN                        |
|-----------------------------|------------------|---------------------------------|---------------------------------|
| Structure                   |                  |                                 |                                 |
| Actual Endpoint (-log C)    | 3.87715          | 4.16036                         | 3.81665                         |
| Predicted Endpoint (-log C) | 3.6546           | 4.65915                         | 4.42315                         |
| Distance                    | 0.666            | 0.667                           | 0.668                           |
| Reference                   | NTP REPORT # 225 | EPA COVER SHEET 0192;891101;(1) | EPA COVER SHEET 0339;881201;(1) |

## Model Applicability

Unknown features are fingerprint features in the query molecule, but not found or appearing too infrequently in the training set.

1. All properties and OPS components are within expected ranges.
2. Unknown ECFP\_6 feature: 1997021792: [\*]:[cH]:[cH]:[\*]
3. Unknown ECFP\_6 feature: 1996163143: [\*]:[cH]:[cH]:n:[\*]
4. Unknown ECFP\_6 feature: -677055651: [\*]:[cH]:n:[cH]:[\*]
5. Unknown ECFP\_6 feature: -709633021: [\*][c]([\*]):[cH]:n:[\*]
6. Unknown ECFP\_6 feature: -175146122: [\*]C(=[\*])[c]([\*]):[cH]:[\*]):[cH]:[\*]
7. Unknown ECFP\_6 feature: 1430169877: [\*]NC(=O)[c]([\*]):[\*]
8. Unknown ECFP\_6 feature: -177077903: [\*]N[c]([\*]):[cH]:[\*]:[cH]:[\*]
9. Unknown ECFP\_6 feature: 544048674: [\*]C(=[\*])NN=[\*]
10. Unknown ECFP\_6 feature: 1814278164: [\*]N\N=C\[\*]
11. Unknown ECFP\_6 feature: -1832102709: [\*]N=C[c]([\*]):[\*]
12. Unknown ECFP\_6 feature: 1335702447: [\*][c]([\*]):[c](C=[\*]):[cH]:[\*]
13. Unknown ECFP\_6 feature: -176494269: [\*]:[cH]:[c](Cl):[cH]:[\*]
14. Unknown ECFP\_6 feature: 99947387: [\*]:[c]([\*])Cl

## Feature Contribution

### Top features for positive contribution

| Fingerprint | Bit/Smiles | Feature Structure | Score |
|-------------|------------|-------------------|-------|
|             |            |                   |       |



| FCFP_6                                 | 32          | 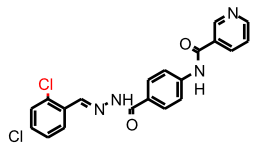<br>[*]Cl      | 0.101  |
|----------------------------------------|-------------|---------------------------------------------------------------------------------------------------|--------|
| FCFP_6                                 | 3           | <br>[*]N[*]    | 0.0924 |
| ECFP_6                                 | -1925046727 | <br>[*]C=[*]   | 0.0915 |
| Top Features for negative contribution |             |                                                                                                   |        |
| Fingerprint                            | Bit/Smiles  | Feature Structure                                                                                 | Score  |
| FCFP_6                                 | 1           | <br>[*]=O    | -0.102 |
| ECFP_6                                 | -1087070950 | <br>[*]N=[*] | -0.102 |



FCFP\_6

-453677277

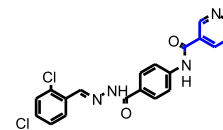

[\*]C(=[\*])[c]1:[cH]:[  
\*]:[cH]:[cH]:[cH]:1

-0.0906



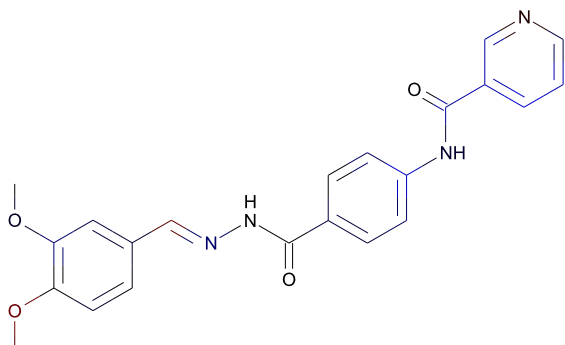

$C_{22}H_{20}N_4O_4$

Molecular Weight: 404.4186

ALogP: 2.284

Rotatable Bonds: 7

Acceptors: 6

Donors: 2

## Model Prediction

Prediction: 0.103

Unit: g/kg\_body\_weight

Mahalanobis Distance: 29.4

Mahalanobis Distance p-value: 1.73e-023

Mahalanobis Distance: The Mahalanobis distance (MD) is a generalization of the Euclidean distance that accounts for correlations among the X properties. It is calculated as the distance to the center of the training data. The larger the MD, the less trustworthy the prediction.

Mahalanobis Distance p-value: The p-value gives the fraction of training data with an MD greater than or equal to the one for the given sample, assuming normally distributed data. The smaller the p-value, the less trustworthy the prediction. For highly non-normal X properties (e.g., fingerprints), the MD p-value is wildly inaccurate.

## Structural Similar Compounds

| Name                        | ISOXABEN                           | CHLORSULFURON                      | GLIPIZIDE |
|-----------------------------|------------------------------------|------------------------------------|-----------|
| Structure                   |                                    |                                    |           |
| Actual Endpoint (-log C)    | 3.81665                            | 4.15566                            | 3.94991   |
| Predicted Endpoint (-log C) | 4.42315                            | 3.79771                            | 3.95594   |
| Distance                    | 0.688                              | 0.694                              | 0.703     |
| Reference                   | EPA COVER SHEET<br>0339;881201;(1) | EPA COVER SHEET<br>0027;880301;(1) | NDA-17583 |

## Model Applicability

Unknown features are fingerprint features in the query molecule, but not found or appearing too infrequently in the training set.

1. OPS PC18 out of range. Value: -5.3082. Training min, max, SD, explained variance: -4.7991, 6.1674, 1.831, 0.0147.
2. Unknown ECFP\_6 feature: 1997021792: [\*]:[cH]:[cH]:[cH]:[\*]
3. Unknown ECFP\_6 feature: 1996163143: [\*]:[cH]:[cH]:n:[\*]
4. Unknown ECFP\_6 feature: -677055651: [\*]:[cH]:n:[cH]:[\*]
5. Unknown ECFP\_6 feature: -709633021: [\*][c](:[\*]):[cH]:n:[\*]
6. Unknown ECFP\_6 feature: -175146122: [\*]C(=[\*])[c](:[cH]):[\*]):[cH]:[\*]
7. Unknown ECFP\_6 feature: 1430169877: [\*]NC(=O)[c](:[\*]):[\*]
8. Unknown ECFP\_6 feature: -177077903: [\*]N[c](:[cH]):[\*]):[cH]:[\*]
9. Unknown ECFP\_6 feature: 544048674: [\*]C(=[\*])NN=[\*]
10. Unknown ECFP\_6 feature: 1814278164: [\*]N\N=C\[\*]
11. Unknown ECFP\_6 feature: -1832102709: [\*]N=C[c](:[\*]):[\*]
12. Unknown ECFP\_6 feature: -176483725: [\*]=C[c](:[cH]):[\*]):[cH]:[\*]
13. Unknown ECFP\_6 feature: 1307307440: [\*]:[c](:[\*])OC

## Feature Contribution

### Top features for positive contribution

| Fingerprint | Bit/Smiles | Feature Structure | Score |
|-------------|------------|-------------------|-------|
|             |            |                   |       |



| FCFP_6                                 | 3           | 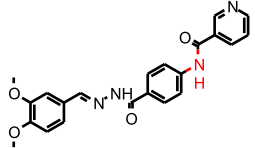<br><chem>[*]N[*]</chem>     | 0.0924 |
|----------------------------------------|-------------|-----------------------------------------------------------------------------------------------------------------|--------|
| ECFP_6                                 | -1925046727 | <br><chem>[*]C=[*]</chem>    | 0.0915 |
| ECFP_6                                 | 2099970318  | <br><chem>[*]C(=O)[*]</chem> | 0.0766 |
| Top Features for negative contribution |             |                                                                                                                 |        |
| Fingerprint                            | Bit/Smiles  | Feature Structure                                                                                               | Score  |
| FCFP_6                                 | 1           | <br><chem>[*]=O</chem>     | -0.102 |
| ECFP_6                                 | -1087070950 | <br><chem>[*]N=[*]</chem>  | -0.102 |



FCFP\_6

-453677277

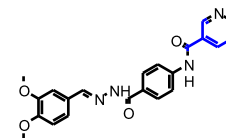

[\*]C(=[\*])[c]1:[cH]:[  
\*]:[cH]:[cH]:[cH]:1

-0.0906



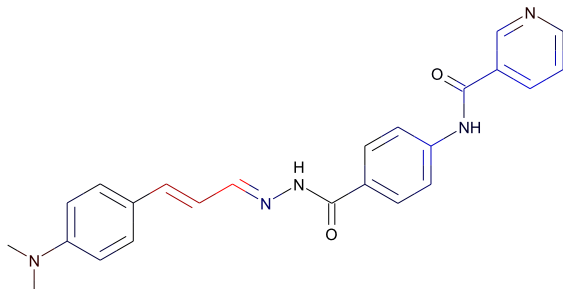

$C_{24}H_{23}N_5O_2$

Molecular Weight: 413.47172

ALogP: 2.839

Rotatable Bonds: 7

Acceptors: 5

Donors: 2

## Model Prediction

Prediction: 0.055

Unit: g/kg\_body\_weight

Mahalanobis Distance: 29.8

Mahalanobis Distance p-value: 2.44e-024

Mahalanobis Distance: The Mahalanobis distance (MD) is a generalization of the Euclidean distance that accounts for correlations among the X properties. It is calculated as the distance to the center of the training data. The larger the MD, the less trustworthy the prediction.

Mahalanobis Distance p-value: The p-value gives the fraction of training data with an MD greater than or equal to the one for the given sample, assuming normally distributed data. The smaller the p-value, the less trustworthy the prediction. For highly non-normal X properties (e.g., fingerprints), the MD p-value is wildly inaccurate.

## Structural Similar Compounds

| Name                        | ISOXABEN                        | DILTIAZEM | DISOPYRAMIDE.PHOSPHATE |
|-----------------------------|---------------------------------|-----------|------------------------|
| Structure                   |                                 |           |                        |
| Actual Endpoint (-log C)    | 3.81665                         | 4.21961   | 3.22979                |
| Predicted Endpoint (-log C) | 4.42315                         | 4.005     | 3.38887                |
| Distance                    | 0.690                           | 0.719     | 0.738                  |
| Reference                   | EPA COVER SHEET 0339;881201;(1) | NDA-18602 | NDA-17447              |

## Model Applicability

Unknown features are fingerprint features in the query molecule, but not found or appearing too infrequently in the training set.

1. All properties and OPS components are within expected ranges.
2. Unknown ECFP\_6 feature: 1997021792: [\*]:[cH]:[cH]:[cH]:[\*]
3. Unknown ECFP\_6 feature: 1996163143: [\*]:[cH]:[cH]:n:[\*]
4. Unknown ECFP\_6 feature: -677055651: [\*]:[cH]:n:[cH]:[\*]
5. Unknown ECFP\_6 feature: -709633021: [\*][c](:[\*]):[cH]:n:[\*]
6. Unknown ECFP\_6 feature: -175146122: [\*]C(=[\*])[c](:[cH]:[\*]):[cH]:[\*]
7. Unknown ECFP\_6 feature: 1430169877: [\*]NC(=O)[c](:[\*]):[\*]
8. Unknown ECFP\_6 feature: -177077903: [\*]N[c](:[cH]:[\*]):[cH]:[\*]
9. Unknown ECFP\_6 feature: 544048674: [\*]C(=[\*])NN=[\*]
10. Unknown ECFP\_6 feature: 1814278164: [\*]N\N=C\[\*]
11. Unknown ECFP\_6 feature: -984423246: [\*]N=C\C=[\*]
12. Unknown ECFP\_6 feature: -471753896: [\*]C=C\C=[\*]
13. Unknown ECFP\_6 feature: -1831055759: [\*]C=C[c](:[\*]):[\*]
14. Unknown ECFP\_6 feature: -176483725: [\*]=C[c](:[cH]:[\*]):[cH]:[\*]
15. Unknown ECFP\_6 feature: -175985444: [\*]N([\*])[c](:[cH]:[\*]):[cH]:[\*]
16. Unknown ECFP\_6 feature: -1328426694: [\*]:[c](:[\*])N(C)C

## Feature Contribution



| Top features for positive contribution |             |                                                                                                                 |        |
|----------------------------------------|-------------|-----------------------------------------------------------------------------------------------------------------|--------|
| Fingerprint                            | Bit/Smiles  | Feature Structure                                                                                               | Score  |
| FCFP_6                                 | 451847724   | 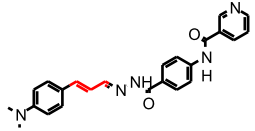<br><chem>[*]\C=C\[*]</chem> | 0.16   |
| FCFP_6                                 | 3           | <br><chem>[*]N[*]</chem>     | 0.0924 |
| ECFP_6                                 | -1925046727 | <br><chem>[*]C=[*]</chem>    | 0.0915 |
| Top Features for negative contribution |             |                                                                                                                 |        |
| Fingerprint                            | Bit/Smiles  | Feature Structure                                                                                               | Score  |
| FCFP_6                                 | 1           | <br><chem>[*]=O</chem>     | -0.102 |



|        |             |                                                                                                                                     |         |
|--------|-------------|-------------------------------------------------------------------------------------------------------------------------------------|---------|
| ECFP_6 | -1087070950 | 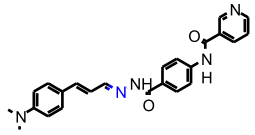 <p>[*]N=[*]</p>                                 | -0.102  |
| FCFP_6 | -453677277  |  <p>[*]C(=[*])[c]1:[cH]:[*]:[cH]:[cH]:[cH]:1</p> | -0.0906 |



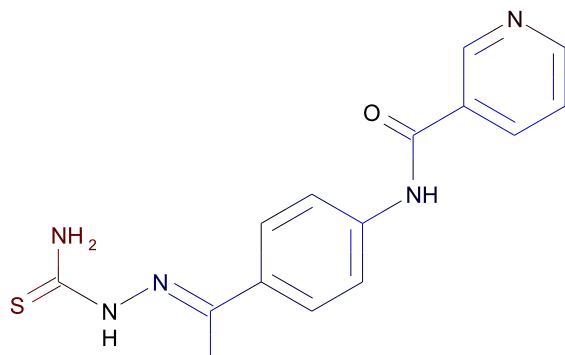

$C_{15}H_{15}N_5OS$

Molecular Weight: 313.3775

ALogP: 1.414

Rotatable Bonds: 5

Acceptors: 4

Donors: 3

## Model Prediction

Prediction: 0.131

Unit: g/kg\_body\_weight

Mahalanobis Distance: 29.4

Mahalanobis Distance p-value: 1.4e-023

Mahalanobis Distance: The Mahalanobis distance (MD) is a generalization of the Euclidean distance that accounts for correlations among the X properties. It is calculated as the distance to the center of the training data. The larger the MD, the less trustworthy the prediction.

Mahalanobis Distance p-value: The p-value gives the fraction of training data with an MD greater than or equal to the one for the given sample, assuming normally distributed data. The smaller the p-value, the less trustworthy the prediction. For highly non-normal X properties (e.g., fingerprints), the MD p-value is wildly inaccurate.

## Structural Similar Compounds

| Name                        | FUROSEMIDE       | PIROXICAM | CHLORSULFURON                   |
|-----------------------------|------------------|-----------|---------------------------------|
| Structure                   |                  |           |                                 |
| Actual Endpoint (-log C)    | 4.27645          | 5.52028   | 4.15566                         |
| Predicted Endpoint (-log C) | 4.40005          | 4.06087   | 3.79771                         |
| Distance                    | 0.482            | 0.624     | 0.642                           |
| Reference                   | NTP REPORT # 356 | NDA-18147 | EPA COVER SHEET 0027;880301;(1) |

## Model Applicability

Unknown features are fingerprint features in the query molecule, but not found or appearing too infrequently in the training set.

1. All properties and OPS components are within expected ranges.
2. Unknown ECFP\_6 feature: 1997021792: [\*]:[cH]:[cH]:[\*]
3. Unknown ECFP\_6 feature: 1996163143: [\*]:[cH]:[cH]:n:[\*]
4. Unknown ECFP\_6 feature: -677055651: [\*]:[cH]:n:[cH]:[\*]
5. Unknown ECFP\_6 feature: -709633021: [\*]:[c]:[\*]:[cH]:n:[\*]
6. Unknown ECFP\_6 feature: -175146122: [\*]:C(=[\*]):[c]:[cH]:[\*]:[cH]:[\*]
7. Unknown ECFP\_6 feature: 1430169877: [\*]:NC(=O):[c]:[\*]:[\*]
8. Unknown ECFP\_6 feature: -177077903: [\*]:N[c]:[cH]:[\*]:[cH]:[\*]
9. Unknown ECFP\_6 feature: 128986386: [\*]:N=C(/C):[c]:[\*]:[\*]
10. Unknown ECFP\_6 feature: 560380707: [\*]:NN=C([\*]):[\*]
11. Unknown ECFP\_6 feature: 544048674: [\*]:C(=[\*]):NN=[\*]
12. Unknown ECFP\_6 feature: -571028867: [\*]:NC(=S):N
13. Unknown ECFP\_6 feature: -932108170: [\*]:C(=[\*]):N
14. Unknown ECFP\_6 feature: 1979182050: [\*]:C(=S):[\*]

## Feature Contribution

### Top features for positive contribution

| Fingerprint | Bit/Smiles | Feature Structure | Score |
|-------------|------------|-------------------|-------|
|             |            |                   |       |



|                                        |                   |                                                                                                        |              |
|----------------------------------------|-------------------|--------------------------------------------------------------------------------------------------------|--------------|
| ECFP_6                                 | -845108448        | 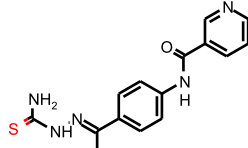 <p>[*]=S</p>       | 0.105        |
| FCFP_6                                 | 3                 |  <p>[*]N[*]</p>     | 0.0924       |
| ECFP_6                                 | 2099970318        |  <p>[*]C(=O)[*]</p> | 0.0766       |
| Top Features for negative contribution |                   |                                                                                                        |              |
| <b>Fingerprint</b>                     | <b>Bit/Smiles</b> | <b>Feature Structure</b>                                                                               | <b>Score</b> |
| FCFP_6                                 | 1                 |  <p>[*]=O</p>     | -0.102       |
| ECFP_6                                 | -1087070950       |  <p>[*]N=[*]</p>  | -0.102       |



FCFP\_6

-453677277

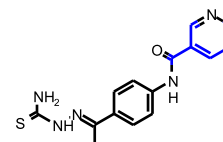

[\*]C(=[\*])[c]1:[cH]:[  
\*]:[cH]:[cH]:[cH]:1

-0.0906



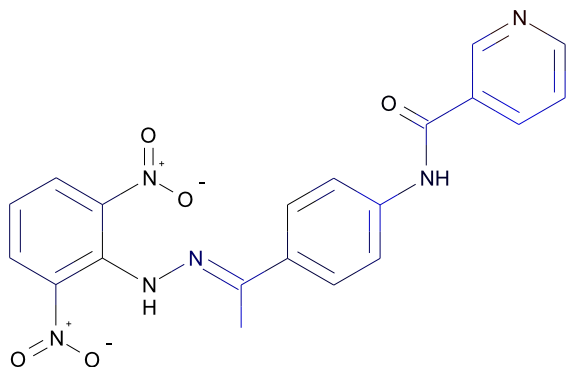
 $C_{20}H_{16}N_6O_5$ 

Molecular Weight: 420.37824

ALogP: 2.852

Rotatable Bonds: 7

Acceptors: 8

Donors: 2

## Model Prediction

Prediction: 0.231

Unit: g/kg\_body\_weight

Mahalanobis Distance: 29.6

Mahalanobis Distance p-value: 6.28e-024

Mahalanobis Distance: The Mahalanobis distance (MD) is a generalization of the Euclidean distance that accounts for correlations among the X properties. It is calculated as the distance to the center of the training data. The larger the MD, the less trustworthy the prediction.

Mahalanobis Distance p-value: The p-value gives the fraction of training data with an MD greater than or equal to the one for the given sample, assuming normally distributed data. The smaller the p-value, the less trustworthy the prediction. For highly non-normal X properties (e.g., fingerprints), the MD p-value is wildly inaccurate.

## Structural Similar Compounds

| Name                        | C.I. ACID ORANGE 3 | ALLY                            | C.I. ACID ORANGE 10 |
|-----------------------------|--------------------|---------------------------------|---------------------|
| Structure                   |                    |                                 |                     |
| Actual Endpoint (-log C)    | 3.20573            | 3.1834                          | 3.435               |
| Predicted Endpoint (-log C) | 3.55956            | 3.59541                         | 3.28295             |
| Distance                    | 0.600              | 0.654                           | 0.656               |
| Reference                   | NTP REPORT # 335   | EPA COVER SHEET 0288;891101;(1) | NTP REPORT # 211    |

## Model Applicability

Unknown features are fingerprint features in the query molecule, but not found or appearing too infrequently in the training set.

1. All properties and OPS components are within expected ranges.
2. Unknown FCFP\_2 feature: 5: [\*][O-]
3. Unknown FCFP\_2 feature: 1294285001: [\*]=NN[c](:[\*]):[\*]
4. Unknown FCFP\_2 feature: -828984032: [\*][c](:[\*]):[c]([N+](=[\*])[\*]):c:[\*]
5. Unknown FCFP\_2 feature: -1338588315: [\*]:[c](:[\*])[N+](=O)[O-]
6. Unknown FCFP\_2 feature: 1872392852: [\*][N+](=O)[\*]
7. Unknown FCFP\_2 feature: 260476081: [\*][N+](=[\*])[O-]
8. Unknown ECFP\_6 feature: 1043790491: [\*][N+](=[\*])[\*]
9. Unknown ECFP\_6 feature: 781519895: [\*][O-]
10. Unknown ECFP\_6 feature: 1997021792: [\*]:[cH]:[cH]:[cH]:[\*]
11. Unknown ECFP\_6 feature: 1996163143: [\*]:[cH]:[cH]:n:[\*]
12. Unknown ECFP\_6 feature: -677055651: [\*]:[cH]:n:[cH]:[\*]
13. Unknown ECFP\_6 feature: -709633021: [\*][c](:[\*]):[cH]:n:[\*]
14. Unknown ECFP\_6 feature: -175146122: [\*]C(=[\*])[c](:[cH]:[\*]):[cH]:[\*]
15. Unknown ECFP\_6 feature: 1430169877: [\*]NC(=O)[c](:[\*]):[\*]
16. Unknown ECFP\_6 feature: -177077903: [\*]N[c](:[cH]:[\*]):[cH]:[\*]
17. Unknown ECFP\_6 feature: 128986386: [\*]N=C(/C)[c](:[\*]):[\*]
18. Unknown ECFP\_6 feature: 560380707: [\*]NN=C([\*])[\*]
19. Unknown ECFP\_6 feature: -1236714312: [\*]=NN[c](:[\*]):[\*]



20. Unknown ECFP\_6 feature: -1660205591: [\*]N[c](:[c]([\*]):[\*]):[c]([\*]):[\*]
21. Unknown ECFP\_6 feature: -1956535100: [\*][c](:[\*]):[c](:[cH]:[\*])[N+](=[\*])[\*]
22. Unknown ECFP\_6 feature: -215026467: [\*]:[c](:[\*])[N+](=O)[O-]
23. Unknown ECFP\_6 feature: 2104376220: [\*][N+](=O)[\*]
24. Unknown ECFP\_6 feature: -659271057: [\*][N+](=[\*])[O-]

## Feature Contribution

### Top features for positive contribution

| Fingerprint | Bit/Smiles | Feature Structure                                                                                                                 | Score  |
|-------------|------------|-----------------------------------------------------------------------------------------------------------------------------------|--------|
| FCFP_6      | 3          | 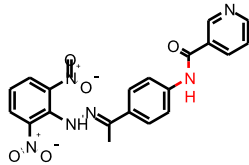<br>[*]N[*]                                    | 0.0924 |
| ECFP_6      | 2099970318 | <br>[*]C(=O)[*]                                | 0.0766 |
| ECFP_6      | 2007300961 | <br>[*][c]1:[*]:[c]([*]):<br>[cH]:[cH]:[cH]:1 | 0.0564 |

### Top Features for negative contribution

| Fingerprint | Bit/Smiles | Feature Structure | Score |
|-------------|------------|-------------------|-------|
|             |            |                   |       |



|        |             |                                                                                                                                           |        |
|--------|-------------|-------------------------------------------------------------------------------------------------------------------------------------------|--------|
| FCFP_6 | 991735244   | 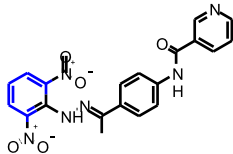<br><chem>[*][c]1:[*]:[c]([*]):[cH]:[cH]:[cH]:1</chem> | -0.134 |
| FCFP_6 | 1           | <br><chem>[*]=O</chem>                                 | -0.102 |
| ECFP_6 | -1087070950 | <br><chem>[*]N=[*]</chem>                              | -0.102 |



# Sorafenib

# TOPKAT\_Chronic\_LOAEL

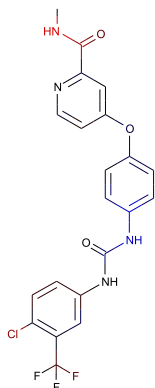

$C_{21}H_{16}ClF_3N_4O_3$

Molecular Weight: 464.82494

ALogP: 4.175

Rotatable Bonds: 6

Acceptors: 4

Donors: 3

## Model Prediction

Prediction: 0.00483

Unit: g/kg\_body\_weight

Mahalanobis Distance: 30

Mahalanobis Distance p-value: 1.21e-024

Mahalanobis Distance: The Mahalanobis distance (MD) is a generalization of the Euclidean distance that accounts for correlations among the X properties. It is calculated as the distance to the center of the training data. The larger the MD, the less trustworthy the prediction.

Mahalanobis Distance p-value: The p-value gives the fraction of training data with an MD greater than or equal to the one for the given sample, assuming normally distributed data. The smaller the p-value, the less trustworthy the prediction. For highly non-normal X properties (e.g., fingerprints), the MD p-value is wildly inaccurate.

## Structural Similar Compounds

| Name                        | GLYBURIDE | D & C RED 9      | SODIUM ACIFLUORFEN              |
|-----------------------------|-----------|------------------|---------------------------------|
| Structure                   |           |                  |                                 |
| Actual Endpoint (-log C)    | 4.21661   | 3.87715          | 4.16036                         |
| Predicted Endpoint (-log C) | 4.21035   | 3.6546           | 4.65915                         |
| Distance                    | 0.636     | 0.722            | 0.736                           |
| Reference                   | UPJ-26452 | NTP REPORT # 225 | EPA COVER SHEET 0192;891101;(1) |

## Model Applicability

Unknown features are fingerprint features in the query molecule, but not found or appearing too infrequently in the training set.

1. All properties and OPS components are within expected ranges.
2. Unknown ECFP\_6 feature: -1046436026: [\*]F
3. Unknown ECFP\_6 feature: 1305253718: [\*]:[c](:[\*])O[c](:[\*]):[\*]
4. Unknown ECFP\_6 feature: 1413420509: [\*]C(=[\*])[c](:[cH]:[\*]):n:[\*]
5. Unknown ECFP\_6 feature: -677309799: [\*][c](:[\*]):n:[cH]:[\*]
6. Unknown ECFP\_6 feature: 1996163143: [\*]:[cH]:[cH]:n:[\*]
7. Unknown ECFP\_6 feature: 1430169877: [\*]NC(=O)[c](:[\*]):[\*]
8. Unknown ECFP\_6 feature: 1338334141: [\*]C(=[\*])NC
9. Unknown ECFP\_6 feature: 864287155: [\*]NC
10. Unknown ECFP\_6 feature: -177077903: [\*]N[c](:[cH]:[\*]):[cH]:[\*]
11. Unknown ECFP\_6 feature: -649580166: [\*]NC(=O)N[\*]
12. Unknown ECFP\_6 feature: 1336678434: [\*][c](:[\*]):[c](:[cH]:[\*])C([\*])([\*])[\*]
13. Unknown ECFP\_6 feature: 99947387: [\*]:[c](:[\*])Cl
14. Unknown ECFP\_6 feature: -1952889961: [\*]:[c](:[\*])C(F)(F)F
15. Unknown ECFP\_6 feature: 226796801: [\*]C([\*])([\*])F

## Feature Contribution

Top features for positive contribution



| Fingerprint                            | Bit/Smiles | Feature Structure                                                                                                               | Score  |
|----------------------------------------|------------|---------------------------------------------------------------------------------------------------------------------------------|--------|
| ECFP_6                                 | -176455838 | 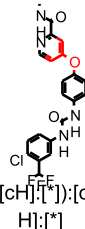<br><chem>[*]O[c](:[cH]:[*]):[cH]:[*]</chem> | 0.106  |
| FCFP_6                                 | 32         | <br><chem>[*]Cl</chem>                       | 0.101  |
| FCFP_6                                 | 3          | <br><chem>[*]N[*]</chem>                     | 0.0924 |
| Top Features for negative contribution |            |                                                                                                                                 |        |
| Fingerprint                            | Bit/Smiles | Feature Structure                                                                                                               | Score  |
| FCFP_6                                 | 1          | <br><chem>[*]=O</chem>                     | -0.102 |
|                                        |            |                                                                                                                                 |        |



|        |             |                                                                                                                                      |         |
|--------|-------------|--------------------------------------------------------------------------------------------------------------------------------------|---------|
| ECFP_6 | -1236483485 | 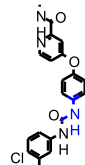<br><chem>[*]C(=[*])N[c]([*]):</chem>             | -0.0747 |
| FCFP_6 | 203677720   | <br><chem>[*]C(=[*])[c]([cH]:[*]):[cH]:[*]</chem> | -0.0713 |



7a

TOPKAT\_Rat\_Maximum\_Tolerated\_Dose\_Feed

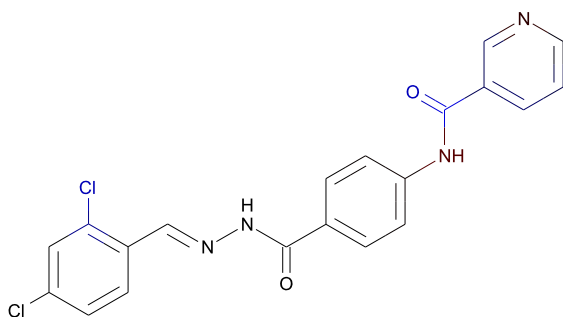
 $C_{20}H_{14}Cl_2N_4O_2$ 

Molecular Weight: 413.25676

ALogP: 3.646

Rotatable Bonds: 5

Acceptors: 4

Donors: 2

## Model Prediction

Prediction: 0.125

Unit: g/kg\_body\_weight

Mahalanobis Distance: 7.9

Mahalanobis Distance p-value: 0.0309

Mahalanobis Distance: The Mahalanobis distance (MD) is a generalization of the Euclidean distance that accounts for correlations among the X properties. It is calculated as the distance to the center of the training data. The larger the MD, the less trustworthy the prediction.

Mahalanobis Distance p-value: The p-value gives the fraction of training data with an MD greater than or equal to the one for the given sample, assuming normally distributed data. The smaller the p-value, the less trustworthy the prediction. For highly non-normal X properties (e.g., fingerprints), the MD p-value is wildly inaccurate.

## Structural Similar Compounds

| Name                        | PHENOLPHTHALEIN | 1-AMINO-2,4-DIBROMOANTHRAQUINO NE | OXAZEPAM       |
|-----------------------------|-----------------|-----------------------------------|----------------|
| Structure                   |                 |                                   |                |
| Actual Endpoint (-log C)    | 2.20184         | 2.82966                           | 3.05262        |
| Predicted Endpoint (-log C) | 2.8857          | 3.92444                           | 3.13073        |
| Distance                    | 0.623           | 0.640                             | 0.651          |
| Reference                   | NCI/NTP TR-465  | NCI/NTP TR-383                    | NCI/NTP TR-468 |

## Model Applicability

Unknown features are fingerprint features in the query molecule, but not found or appearing too infrequently in the training set.

1. All properties and OPS components are within expected ranges.

## Feature Contribution

| Top features for positive contribution |            |                          |        |
|----------------------------------------|------------|--------------------------|--------|
| Fingerprint                            | Bit/Smiles | Feature Structure        | Score  |
| FCFP_2                                 | 3          | <br><chem>[*]N[*]</chem> | 0.0737 |



|                                        |            |                                                                                                                            |         |
|----------------------------------------|------------|----------------------------------------------------------------------------------------------------------------------------|---------|
| FCFP_2                                 | 17         | 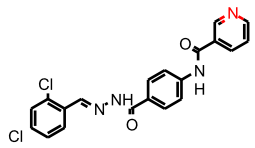<br>[*]:n:[*]                           | 0.0441  |
| FCFP_2                                 | 590925877  | <br>[*]N[c](:[cH]:[*]):[cH]:[*]         | 0.00762 |
| Top Features for negative contribution |            |                                                                                                                            |         |
| Fingerprint                            | Bit/Smiles | Feature Structure                                                                                                          | Score   |
| FCFP_2                                 | 71476542   | <br>[*]:[c](:[*])Cl                     | -0.134  |
| FCFP_2                                 | 1872154524 | <br>[*]C(=O)[*]                       | -0.105  |
| FCFP_2                                 | 203677720  | <br>[*]C(=[*])[c](:[cH]:[*]):[cH]:[*] | -0.0829 |







7b

TOPKAT\_Rat\_Maximum\_Tolerated\_Dose\_Feed

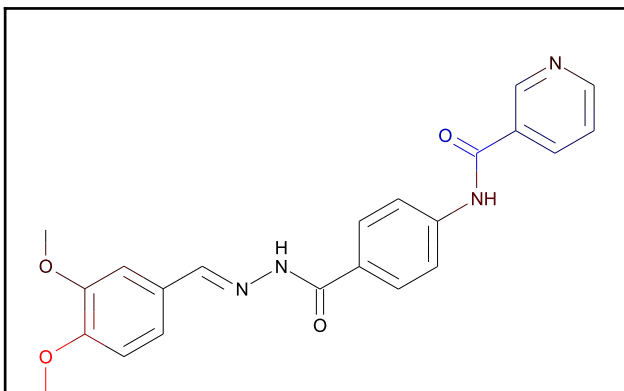C<sub>22</sub>H<sub>20</sub>N<sub>4</sub>O<sub>4</sub>

Molecular Weight: 404.4186

ALogP: 2.284

Rotatable Bonds: 7

Acceptors: 6

Donors: 2

## Model Prediction

Prediction: 0.0578

Unit: g/kg\_body\_weight

Mahalanobis Distance: 7.81

Mahalanobis Distance p-value: 0.039

Mahalanobis Distance: The Mahalanobis distance (MD) is a generalization of the Euclidean distance that accounts for correlations among the X properties. It is calculated as the distance to the center of the training data. The larger the MD, the less trustworthy the prediction.

Mahalanobis Distance p-value: The p-value gives the fraction of training data with an MD greater than or equal to the one for the given sample, assuming normally distributed data. The smaller the p-value, the less trustworthy the prediction. For highly non-normal X properties (e.g., fingerprints), the MD p-value is wildly inaccurate.

## Structural Similar Compounds

| Name                        | SALICYLAZOSULFAPYRIDINE | FUROSEMIDE     | BENZIDINE,3,3'-DIMETHOXY-    |
|-----------------------------|-------------------------|----------------|------------------------------|
| Structure                   |                         |                |                              |
| Actual Endpoint (-log C)    | 3.375                   | 4.04236        | 4.06569                      |
| Predicted Endpoint (-log C) | 2.80292                 | 2.8614         | 3.57405                      |
| Distance                    | 0.687                   | 0.724          | 0.745                        |
| Reference                   | NCI/NTP TR-457          | NCI/NTP TR-356 | NCI/NTP Report 10, Nov. 1987 |

## Model Applicability

Unknown features are fingerprint features in the query molecule, but not found or appearing too infrequently in the training set.

- OPS PC9 out of range. Value: 3.9949. Training min, max, SD, explained variance: -2.8548, 3.3954, 1.263, 0.0360.

## Feature Contribution

### Top features for positive contribution

| Fingerprint | Bit/Smiles | Feature Structure | Score |
|-------------|------------|-------------------|-------|
| FCFP_2      | 136627117  | <p>[*]OC</p>      | 0.173 |



|                                        |            |                                                                                                                            |         |
|----------------------------------------|------------|----------------------------------------------------------------------------------------------------------------------------|---------|
| FCFP_2                                 | 1036089772 | 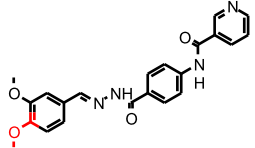<br>[*]:[c](:[*])OC                     | 0.0749  |
| FCFP_2                                 | 3          | <br>[*]N[*]                             | 0.0737  |
| Top Features for negative contribution |            |                                                                                                                            |         |
| Fingerprint                            | Bit/Smiles | Feature Structure                                                                                                          | Score   |
| FCFP_2                                 | 1872154524 | <br>[*]C(=O)[*]                         | -0.105  |
| FCFP_2                                 | 203677720  | <br>[*]C(=[*])[c](:[cH]:[*]):[cH]:[*] | -0.0829 |
| FCFP_2                                 | 1          | <br>[*]=O                             | -0.0796 |







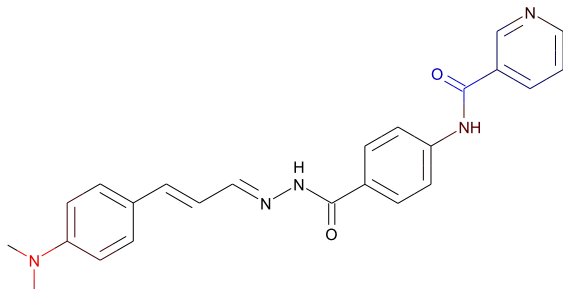
 $C_{24}H_{23}N_5O_2$ 

Molecular Weight: 413.47172

ALogP: 2.839

Rotatable Bonds: 7

Acceptors: 5

Donors: 2

## Model Prediction

Prediction: 0.0637

Unit: g/kg\_body\_weight

Mahalanobis Distance: 8.71

Mahalanobis Distance p-value: 0.00351

Mahalanobis Distance: The Mahalanobis distance (MD) is a generalization of the Euclidean distance that accounts for correlations among the X properties. It is calculated as the distance to the center of the training data. The larger the MD, the less trustworthy the prediction.

Mahalanobis Distance p-value: The p-value gives the fraction of training data with an MD greater than or equal to the one for the given sample, assuming normally distributed data. The smaller the p-value, the less trustworthy the prediction. For highly non-normal X properties (e.g., fingerprints), the MD p-value is wildly inaccurate.

## Structural Similar Compounds

| Name                        | DISPERSE YELLOW 3 | PHENOLPHTHALEIN | CINNAMYL ANTHRANILATE |
|-----------------------------|-------------------|-----------------|-----------------------|
| Structure                   |                   |                 |                       |
| Actual Endpoint (-log C)    | 2.77703           | 2.20184         | 2.2733                |
| Predicted Endpoint (-log C) | 2.80195           | 2.8857          | 3.25473               |
| Distance                    | 0.727             | 0.745           | 0.746                 |
| Reference                   | NCI/NTP TR-222    | NCI/NTP TR-465  | NCI/NTP TR-196        |

## Model Applicability

Unknown features are fingerprint features in the query molecule, but not found or appearing too infrequently in the training set.

1. All properties and OPS components are within expected ranges.

## Feature Contribution

### Top features for positive contribution

| Fingerprint | Bit/Smiles | Feature Structure | Score |
|-------------|------------|-------------------|-------|
| FCFP_2      | 136627117  | <p>[*]OC</p>      | 0.173 |



|                                        |            |                                                                                                                                         |         |
|----------------------------------------|------------|-----------------------------------------------------------------------------------------------------------------------------------------|---------|
| FCFP_2                                 | 3          | 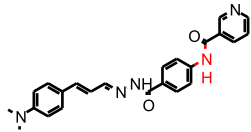<br><chem>[*]N[*]</chem>                             | 0.0737  |
| FCFP_2                                 | 332760439  | <br><chem>[*]O[c](:[cH]:[*]):[c]([*]):[*]</chem>     | 0.0611  |
| Top Features for negative contribution |            |                                                                                                                                         |         |
| Fingerprint                            | Bit/Smiles | Feature Structure                                                                                                                       | Score   |
| FCFP_2                                 | 1872154524 | <br><chem>[*]C(=O)[*]</chem>                         | -0.105  |
| FCFP_2                                 | 203677720  | <br><chem>[*]C(=[*])[c](:[cH]:[*]):[cH]:[*]</chem> | -0.0829 |
| FCFP_2                                 | 1          | <br><chem>[*]=O</chem>                             | -0.0796 |







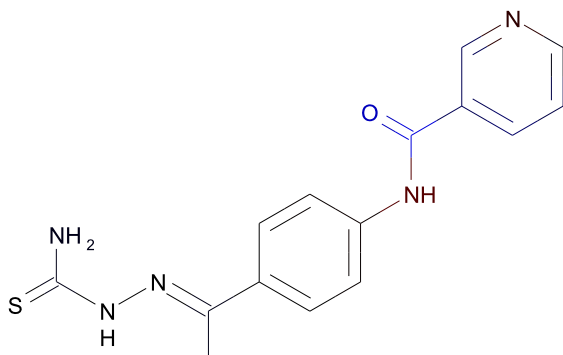

$C_{15}H_{15}N_5OS$

Molecular Weight: 313.3775

ALogP: 1.414

Rotatable Bonds: 5

Acceptors: 4

Donors: 3

## Model Prediction

Prediction: 0.146

Unit: g/kg\_body\_weight

Mahalanobis Distance: 8.01

Mahalanobis Distance p-value: 0.024

Mahalanobis Distance: The Mahalanobis distance (MD) is a generalization of the Euclidean distance that accounts for correlations among the X properties. It is calculated as the distance to the center of the training data. The larger the MD, the less trustworthy the prediction.

Mahalanobis Distance p-value: The p-value gives the fraction of training data with an MD greater than or equal to the one for the given sample, assuming normally distributed data. The smaller the p-value, the less trustworthy the prediction. For highly non-normal X properties (e.g., fingerprints), the MD p-value is wildly inaccurate.

## Structural Similar Compounds

| Name                        | FUROSEMIDE     | NITROFURAZONE  | DAPSONE       |
|-----------------------------|----------------|----------------|---------------|
| Structure                   |                |                |               |
| Actual Endpoint (-log C)    | 4.04236        | 4.21779        | 3.66258       |
| Predicted Endpoint (-log C) | 2.8614         | 3.40885        | 3.26993       |
| Distance                    | 0.371          | 0.582          | 0.595         |
| Reference                   | NCI/NTP TR-356 | NCI/NTP TR-337 | NCI/NTP TR-20 |

## Model Applicability

Unknown features are fingerprint features in the query molecule, but not found or appearing too infrequently in the training set.

1. All properties and OPS components are within expected ranges.

## Feature Contribution

### Top features for positive contribution

| Fingerprint | Bit/Smiles | Feature Structure | Score  |
|-------------|------------|-------------------|--------|
| FCFP_2      | 3          | <br>[*]N[*]       | 0.0737 |



|                                        |            |                                                                                                                                         |         |
|----------------------------------------|------------|-----------------------------------------------------------------------------------------------------------------------------------------|---------|
| FCFP_2                                 | 17         | 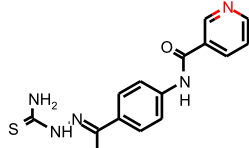<br><chem>[*]:n:[*]</chem>                           | 0.0441  |
| FCFP_2                                 | 590925877  | <br><chem>[*]N[c](:[cH]:[*]):[cH]:[*]</chem>         | 0.00762 |
| Top Features for negative contribution |            |                                                                                                                                         |         |
| Fingerprint                            | Bit/Smiles | Feature Structure                                                                                                                       | Score   |
| FCFP_2                                 | 1872154524 | <br><chem>[*]C(=O)[*]</chem>                         | -0.105  |
| FCFP_2                                 | 203677720  | <br><chem>[*]C(=[*])[c](:[cH]:[*]):[cH]:[*]</chem> | -0.0829 |
| FCFP_2                                 | 1          | <br><chem>[*]=O</chem>                             | -0.0796 |







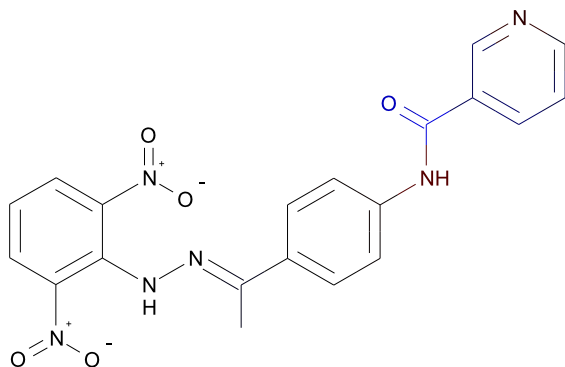

$C_{20}H_{16}N_6O_5$

Molecular Weight: 420.37824

ALogP: 2.852

Rotatable Bonds: 7

Acceptors: 8

Donors: 2

## Model Prediction

Prediction: 0.111

Unit: g/kg\_body\_weight

Mahalanobis Distance: 7.54

Mahalanobis Distance p-value: 0.0702

Mahalanobis Distance: The Mahalanobis distance (MD) is a generalization of the Euclidean distance that accounts for correlations among the X properties. It is calculated as the distance to the center of the training data. The larger the MD, the less trustworthy the prediction.

Mahalanobis Distance p-value: The p-value gives the fraction of training data with an MD greater than or equal to the one for the given sample, assuming normally distributed data. The smaller the p-value, the less trustworthy the prediction. For highly non-normal X properties (e.g., fingerprints), the MD p-value is wildly inaccurate.

## Structural Similar Compounds

| Name                        | SALICYLAZOSULFAPYRIDINE | C.I.PIGMENT RED 23 | FUROSEMIDE     |
|-----------------------------|-------------------------|--------------------|----------------|
| Structure                   |                         |                    |                |
| Actual Endpoint (-log C)    | 3.375                   | 2.30052            | 4.04236        |
| Predicted Endpoint (-log C) | 2.80292                 | 3.55333            | 2.8614         |
| Distance                    | 0.506                   | 0.697              | 0.754          |
| Reference                   | NCI/NTP TR-457          | NCI/NTP TR-411     | NCI/NTP TR-356 |

## Model Applicability

Unknown features are fingerprint features in the query molecule, but not found or appearing too infrequently in the training set.

1. All properties and OPS components are within expected ranges.
2. Unknown FCFP\_2 feature: 8: [\*][N+](=[\*])[\*]
3. Unknown FCFP\_2 feature: 5: [\*][O-]
4. Unknown FCFP\_2 feature: 1294285001: [\*]=NN[c](:[\*]):[\*]
5. Unknown FCFP\_2 feature: -828984032: [\*][c](:[\*]):[c]([N+](=[\*])[\*]):c:[\*]
6. Unknown FCFP\_2 feature: -1338588315: [\*]:[c](:[\*])[N+](=O)[O-]
7. Unknown FCFP\_2 feature: 1872392852: [\*][N+](=O)[\*]
8. Unknown FCFP\_2 feature: 260476081: [\*][N+](=[\*])[O-]

## Feature Contribution

### Top features for positive contribution

| Fingerprint | Bit/Smiles | Feature Structure | Score |
|-------------|------------|-------------------|-------|
|             |            |                   |       |



|                                        |            |                                                                                                                                         |         |
|----------------------------------------|------------|-----------------------------------------------------------------------------------------------------------------------------------------|---------|
| FCFP_2                                 | 3          | 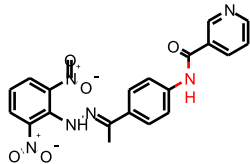<br><chem>[*]N[*]</chem>                             | 0.0737  |
| FCFP_2                                 | 17         | <br><chem>[*]:n:[*]</chem>                           | 0.0441  |
| FCFP_2                                 | 590925877  | <br><chem>[*]N[c](:[cH]:[*]):[cH]:[*]</chem>         | 0.00762 |
| Top Features for negative contribution |            |                                                                                                                                         |         |
| Fingerprint                            | Bit/Smiles | Feature Structure                                                                                                                       | Score   |
| FCFP_2                                 | 1872154524 | <br><chem>[*]C(=O)[*]</chem>                       | -0.105  |
| FCFP_2                                 | 203677720  | <br><chem>[*]C(=[*])[c](:[cH]:[*]):[cH]:[*]</chem> | -0.0829 |



|        |   |                                                                                                                                |         |
|--------|---|--------------------------------------------------------------------------------------------------------------------------------|---------|
| FCFP_2 | 1 | 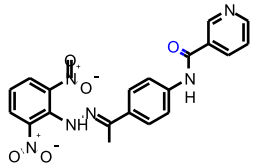 <p data-bbox="1465 310 1535 342">[*]=O</p> | -0.0796 |
|--------|---|--------------------------------------------------------------------------------------------------------------------------------|---------|



# Sorafenib

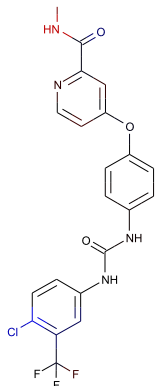

$C_{21}H_{16}ClF_3N_4O_3$

Molecular Weight: 464.82494

ALogP: 4.175

Rotatable Bonds: 6

Acceptors: 4

Donors: 3

## Model Prediction

Prediction: 0.0885

Unit: g/kg\_body\_weight

Mahalanobis Distance: 12.4

Mahalanobis Distance p-value: 1.76e-009

Mahalanobis Distance: The Mahalanobis distance (MD) is a generalization of the Euclidean distance that accounts for correlations among the X properties. It is calculated as the distance to the center of the training data. The larger the MD, the less trustworthy the prediction.

Mahalanobis Distance p-value: The p-value gives the fraction of training data with an MD greater than or equal to the one for the given sample, assuming normally distributed data. The smaller the p-value, the less trustworthy the prediction. For highly non-normal X properties (e.g., fingerprints), the MD p-value is wildly inaccurate.

# TOPKAT\_Rat\_Maximum\_Tolerated\_Dose\_Feed

## Structural Similar Compounds

| Name                        | FUROSEMIDE     | PHENOLPHTHALEIN | DISPERSE YELLOW 3 |
|-----------------------------|----------------|-----------------|-------------------|
| Structure                   |                |                 |                   |
| Actual Endpoint (-log C)    | 4.04236        | 2.20184         | 2.77703           |
| Predicted Endpoint (-log C) | 2.8614         | 2.8857          | 2.80195           |
| Distance                    | 0.741          | 0.780           | 0.799             |
| Reference                   | NCI/NTP TR-356 | NCI/NTP TR-465  | NCI/NTP TR-222    |

## Model Applicability

Unknown features are fingerprint features in the query molecule, but not found or appearing too infrequently in the training set.

1. All properties and OPS components are within expected ranges.

## Feature Contribution

### Top features for positive contribution

| Fingerprint | Bit/Smiles | Feature Structure | Score |
|-------------|------------|-------------------|-------|
| FCFP_2      | -885550502 | <br>[*]C(=[*])NC  | 0.115 |



|                                        |            |                                                                                                                            |         |
|----------------------------------------|------------|----------------------------------------------------------------------------------------------------------------------------|---------|
| FCFP_2                                 | 3          | 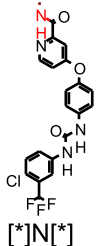                                        | 0.0737  |
| FCFP_2                                 | 332760439  | <br>[*]O[c](:[cH]:[*]):[c]([*]):[*]     | 0.0611  |
| Top Features for negative contribution |            |                                                                                                                            |         |
| Fingerprint                            | Bit/Smiles | Feature Structure                                                                                                          | Score   |
| FCFP_2                                 | 71476542   | <br>[*]:[c](:[*])Cl                     | -0.134  |
| FCFP_2                                 | 1872154524 | <br>[*]C(=O)[*]                       | -0.105  |
| FCFP_2                                 | 203677720  | <br>[*]C(=[*])[c](:[cH]:[*]):[cH]:[*] | -0.0829 |







7a

## TOPKAT\_Rat\_Maximum\_Tolerated\_Dose\_Gavage

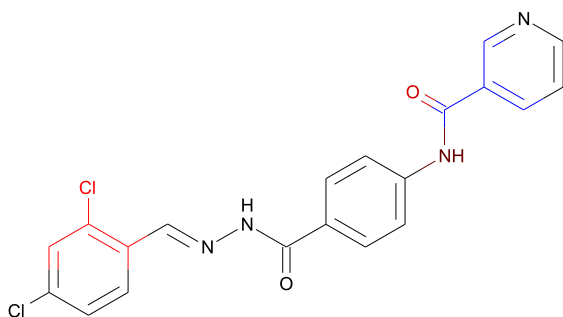C<sub>20</sub>H<sub>14</sub>Cl<sub>2</sub>N<sub>4</sub>O<sub>2</sub>

Molecular Weight: 413.25676

ALogP: 3.646

Rotatable Bonds: 5

Acceptors: 4

Donors: 2

**Model Prediction**

Prediction: 0.00502

Unit: g/kg\_body\_weight

Mahalanobis Distance: 7.75

Mahalanobis Distance p-value: 0.00403

Mahalanobis Distance: The Mahalanobis distance (MD) is a generalization of the Euclidean distance that accounts for correlations among the X properties. It is calculated as the distance to the center of the training data. The larger the MD, the less trustworthy the prediction.

Mahalanobis Distance p-value: The p-value gives the fraction of training data with an MD greater than or equal to the one for the given sample, assuming normally distributed data. The smaller the p-value, the less trustworthy the prediction. For highly non-normal X properties (e.g., fingerprints), the MD p-value is wildly inaccurate.

**Structural Similar Compounds**

| Name                        | OCHRATOXIN     | SULFISOOXAZOLE | PROBENECID     |
|-----------------------------|----------------|----------------|----------------|
| Structure                   |                |                |                |
| Actual Endpoint (-log C)    | 6.28396        | 2.82494        | 2.85333        |
| Predicted Endpoint (-log C) | 5.12358        | 3.0705         | 2.4258         |
| Distance                    | 0.803          | 0.860          | 1.041          |
| Reference                   | NCI/NTP TR-358 | NCI/NTP TR-138 | NCI/NTP TR-395 |

**Model Applicability**

Unknown features are fingerprint features in the query molecule, but not found or appearing too infrequently in the training set.

1. Num\_AromaticRings out of range. Value: 3. Training min, max, mean, SD: 0, 2, 0.5625, 0.693.
2. OPS PC7 out of range. Value: -3.7431. Training min, max, SD, explained variance: -2.8003, 2.9332, 1.16, 0.0416.
3. Unknown FCFP\_2 feature: -885520711: [\*]C(=[\*])NN=[\*]
4. Unknown FCFP\_2 feature: 581019816: [\*]N\N=C\[\*]

**Feature Contribution****Top features for positive contribution**

| Fingerprint | Bit/Smiles | Feature Structure | Score |
|-------------|------------|-------------------|-------|
| FCFP_2      | 32         | <br>[*]Cl         | 0.526 |



|                                        |            |                                                                                                                          |        |
|----------------------------------------|------------|--------------------------------------------------------------------------------------------------------------------------|--------|
| FCFP_2                                 | 1          | 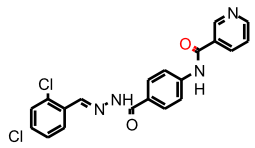<br>[*]=O                             | 0.511  |
| FCFP_2                                 | 367998008  | <br>[*][c](:[*]):[c](Cl):<br>[cH]:[*] | 0.413  |
| Top Features for negative contribution |            |                                                                                                                          |        |
| Fingerprint                            | Bit/Smiles | Feature Structure                                                                                                        | Score  |
| FCFP_2                                 | 203677720  | <br>[*]C(=[*])[c](:[cH]:[*]):[cH]:[*] | -0.406 |
| FCFP_2                                 | 1872154524 | <br>[*]C(=O)[*]                     | -0.307 |
| FCFP_2                                 | 0          | <br>[*]C(=[*])[*]                   | -0.29  |







7b

TOPKAT\_Rat\_Maximum\_Tolerated\_Dose\_Gavage

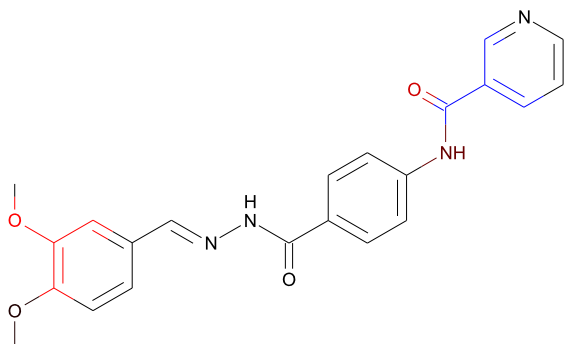C<sub>22</sub>H<sub>20</sub>N<sub>4</sub>O<sub>4</sub>

Molecular Weight: 404.4186

ALogP: 2.284

Rotatable Bonds: 7

Acceptors: 6

Donors: 2

### Model Prediction

Prediction: 0.00276

Unit: g/kg\_body\_weight

Mahalanobis Distance: 8.67

Mahalanobis Distance p-value: 0.000324

Mahalanobis Distance: The Mahalanobis distance (MD) is a generalization of the Euclidean distance that accounts for correlations among the X properties. It is calculated as the distance to the center of the training data. The larger the MD, the less trustworthy the prediction.

Mahalanobis Distance p-value: The p-value gives the fraction of training data with an MD greater than or equal to the one for the given sample, assuming normally distributed data. The smaller the p-value, the less trustworthy the prediction. For highly non-normal X properties (e.g., fingerprints), the MD p-value is wildly inaccurate.

### Structural Similar Compounds

| Name                        | OCHRATOXIN     | SULFISOOXAZOLE | PENICILLIN VK  |
|-----------------------------|----------------|----------------|----------------|
| Structure                   |                |                |                |
| Actual Endpoint (-log C)    | 6.28396        | 2.82494        | 2.54455        |
| Predicted Endpoint (-log C) | 5.12358        | 3.0705         | 3.9702         |
| Distance                    | 0.798          | 0.851          | 0.965          |
| Reference                   | NCI/NTP TR-358 | NCI/NTP TR-138 | NCI/NTP TR-336 |

### Model Applicability

Unknown features are fingerprint features in the query molecule, but not found or appearing too infrequently in the training set.

1. Num\_AromaticRings out of range. Value: 3. Training min, max, mean, SD: 0, 2, 0.5625, 0.693.
2. OPS PC6 out of range. Value: -3.1581. Training min, max, SD, explained variance: -2.4321, 2.9885, 1.256, 0.0488.
3. Unknown FCFP\_2 feature: -885520711: [\*]C(=[\*])NN=[\*]
4. Unknown FCFP\_2 feature: 581019816: [\*]N\N=C\[\*]

### Feature Contribution

#### Top features for positive contribution

| Fingerprint | Bit/Smiles | Feature Structure                                | Score |
|-------------|------------|--------------------------------------------------|-------|
| FCFP_2      | 332760439  | <br><chem>[*]O[c](:[cH]:[*]):[c]([*]):[*]</chem> | 0.672 |



|                                        |            |                                                                                                                                       |        |
|----------------------------------------|------------|---------------------------------------------------------------------------------------------------------------------------------------|--------|
| FCFP_2                                 | 1          | 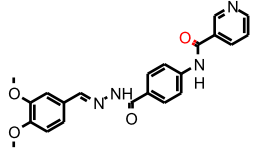<br><chem>[*]=O</chem>                             | 0.511  |
| FCFP_2                                 | 3          | <br><chem>[*]N[*]</chem>                           | 0.104  |
| Top Features for negative contribution |            |                                                                                                                                       |        |
| Fingerprint                            | Bit/Smiles | Feature Structure                                                                                                                     | Score  |
| FCFP_2                                 | 203677720  | <br><chem>[*]C(=[*])[c](:[cH]:[*]):[cH]:[*]</chem> | -0.406 |
| FCFP_2                                 | 1872154524 | <br><chem>[*]C(=O)[*]</chem>                     | -0.307 |
| FCFP_2                                 | 0          | <br><chem>[*]C(=[*])[*]</chem>                   | -0.29  |







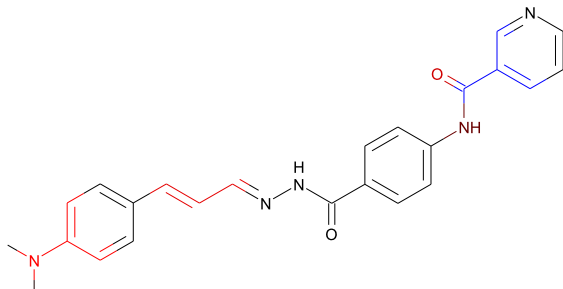

$C_{24}H_{23}N_5O_2$

Molecular Weight: 413.47172

ALogP: 2.839

Rotatable Bonds: 7

Acceptors: 5

Donors: 2

## Model Prediction

Prediction: 0.00385

Unit: g/kg\_body\_weight

Mahalanobis Distance: 9.86

Mahalanobis Distance p-value: 8.78e-006

Mahalanobis Distance: The Mahalanobis distance (MD) is a generalization of the Euclidean distance that accounts for correlations among the X properties. It is calculated as the distance to the center of the training data. The larger the MD, the less trustworthy the prediction.

Mahalanobis Distance p-value: The p-value gives the fraction of training data with an MD greater than or equal to the one for the given sample, assuming normally distributed data. The smaller the p-value, the less trustworthy the prediction. For highly non-normal X properties (e.g., fingerprints), the MD p-value is wildly inaccurate.

## Structural Similar Compounds

| Name                        | OCHRATOXIN     | SULFISOOXAZOLE | PROBENECID     |
|-----------------------------|----------------|----------------|----------------|
| Structure                   |                |                |                |
| Actual Endpoint (-log C)    | 6.28396        | 2.82494        | 2.85333        |
| Predicted Endpoint (-log C) | 5.12358        | 3.0705         | 2.4258         |
| Distance                    | 0.852          | 0.891          | 1.033          |
| Reference                   | NCI/NTP TR-358 | NCI/NTP TR-138 | NCI/NTP TR-395 |

## Model Applicability

Unknown features are fingerprint features in the query molecule, but not found or appearing too infrequently in the training set.

1. Num\_AromaticRings out of range. Value: 3. Training min, max, mean, SD: 0, 2, 0.5625, 0.693.
2. OPS PC6 out of range. Value: -2.8672. Training min, max, SD, explained variance: -2.4321, 2.9885, 1.256, 0.0488.
3. OPS PC7 out of range. Value: -3.0478. Training min, max, SD, explained variance: -2.8003, 2.9332, 1.16, 0.0416.
4. Unknown FCFP\_2 feature: -885520711: [\*]C(=[\*])NN=[\*]
5. Unknown FCFP\_2 feature: 581019816: [\*]N\N=C\[\*]
6. Unknown FCFP\_2 feature: -2100309237: [\*]\N=C\[\*]

## Feature Contribution

### Top features for positive contribution

| Fingerprint | Bit/Smiles | Feature Structure | Score |
|-------------|------------|-------------------|-------|
|             |            |                   |       |



| FCFP_2                                 | 332760439  | 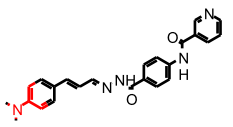<br><chem>[*]O[c](:[cH]:[*]):[c]([[*]):[*]]</chem>         | 0.672  |
|----------------------------------------|------------|-----------------------------------------------------------------------------------------------------------------------------------------------|--------|
| FCFP_2                                 | 1          | <br><chem>[*]=O</chem>                                     | 0.511  |
| FCFP_2                                 | 451847724  | <br><chem>[*]\C=C\C=[*]</chem>                             | 0.225  |
| Top Features for negative contribution |            |                                                                                                                                               |        |
| Fingerprint                            | Bit/Smiles | Feature Structure                                                                                                                             | Score  |
| FCFP_2                                 | 203677720  | <br><chem>[*]C(=[*])[c](:[cH]:[*]):[c]([[*]):[*]]</chem> | -0.406 |
| FCFP_2                                 | 1872154524 | <br><chem>[*]C(=O)[*]</chem>                             | -0.307 |



|        |   |                                                                                                                   |       |
|--------|---|-------------------------------------------------------------------------------------------------------------------|-------|
| FCFP_2 | 0 | 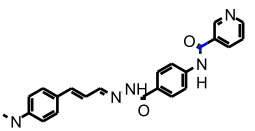<br><chem>[*]C(=[*])[*]</chem> | -0.29 |
|--------|---|-------------------------------------------------------------------------------------------------------------------|-------|



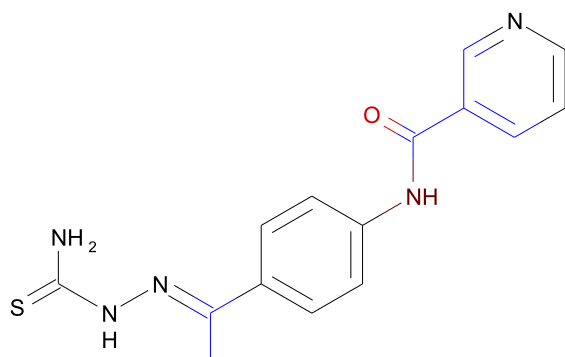

$C_{15}H_{15}N_5OS$

Molecular Weight: 313.3775

ALogP: 1.414

Rotatable Bonds: 5

Acceptors: 4

Donors: 3

## Model Prediction

Prediction: 1.66

Unit: g/kg\_body\_weight

Mahalanobis Distance: 7.96

Mahalanobis Distance p-value: 0.00229

Mahalanobis Distance: The Mahalanobis distance (MD) is a generalization of the Euclidean distance that accounts for correlations among the X properties. It is calculated as the distance to the center of the training data. The larger the MD, the less trustworthy the prediction.

Mahalanobis Distance p-value: The p-value gives the fraction of training data with an MD greater than or equal to the one for the given sample, assuming normally distributed data. The smaller the p-value, the less trustworthy the prediction. For highly non-normal X properties (e.g., fingerprints), the MD p-value is wildly inaccurate.

## Structural Similar Compounds

| Name                        | SULFISOOXAZOLE | HC RED 3       | OCHRATOXIN     |
|-----------------------------|----------------|----------------|----------------|
| Structure                   |                |                |                |
| Actual Endpoint (-log C)    | 2.82494        | 2.59592        | 6.28396        |
| Predicted Endpoint (-log C) | 3.0705         | 3.285          | 5.12358        |
| Distance                    | 0.605          | 0.689          | 0.729          |
| Reference                   | NCI/NTP TR-138 | NCI/NTP TR-281 | NCI/NTP TR-358 |

## Model Applicability

Unknown features are fingerprint features in the query molecule, but not found or appearing too infrequently in the training set.

1. All properties and OPS components are within expected ranges.
2. Unknown FCFP\_2 feature: -1549192822: [\*]\N=C(/C)\[c](:[\*]):[\*]
3. Unknown FCFP\_2 feature: 581019816: [\*]\N=C\[\*]
4. Unknown FCFP\_2 feature: -885520711: [\*]C(=[\*])NN=[\*]
5. Unknown FCFP\_2 feature: 1499521844: [\*]NC(=S)N

## Feature Contribution

### Top features for positive contribution

| Fingerprint | Bit/Smiles | Feature Structure | Score |
|-------------|------------|-------------------|-------|
| FCFP_2      | 1          | <p>[*]=O</p>      | 0.511 |



|                                        |            |                                                                                                                                       |        |
|----------------------------------------|------------|---------------------------------------------------------------------------------------------------------------------------------------|--------|
| FCFP_2                                 | 3          | 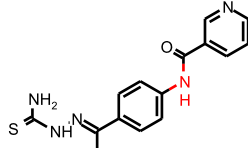<br><chem>[*]N[*]</chem>                           | 0.104  |
| Top Features for negative contribution |            |                                                                                                                                       |        |
| Fingerprint                            | Bit/Smiles | Feature Structure                                                                                                                     | Score  |
| FCFP_2                                 | 136597326  | <br><chem>[*]C(=[*])C</chem>                       | -0.489 |
| FCFP_2                                 | 203677720  | <br><chem>[*]C(=[*])[c](:[cH]:[*]):[cH]:[*]</chem> | -0.406 |
| FCFP_2                                 | 1872154524 | <br><chem>[*]C(=O)[*]</chem>                     | -0.307 |



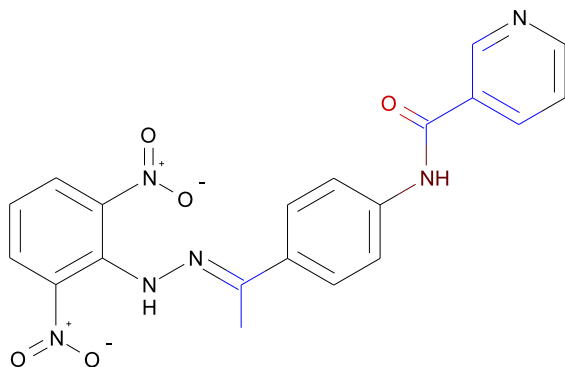
 $C_{20}H_{16}N_6O_5$ 

Molecular Weight: 420.37824

ALogP: 2.852

Rotatable Bonds: 7

Acceptors: 8

Donors: 2

## Model Prediction

Prediction: 0.0104

Unit: g/kg\_body\_weight

Mahalanobis Distance: 10.5

Mahalanobis Distance p-value: 1.1e-006

Mahalanobis Distance: The Mahalanobis distance (MD) is a generalization of the Euclidean distance that accounts for correlations among the X properties. It is calculated as the distance to the center of the training data. The larger the MD, the less trustworthy the prediction.

Mahalanobis Distance p-value: The p-value gives the fraction of training data with an MD greater than or equal to the one for the given sample, assuming normally distributed data. The smaller the p-value, the less trustworthy the prediction. For highly non-normal X properties (e.g., fingerprints), the MD p-value is wildly inaccurate.

## Structural Similar Compounds

| Name                        | OCHRATOXIN     | SULFISOOXAZOLE | PENICILLIN VK  |
|-----------------------------|----------------|----------------|----------------|
| Structure                   |                |                |                |
| Actual Endpoint (-log C)    | 6.28396        | 2.82494        | 2.54455        |
| Predicted Endpoint (-log C) | 5.12358        | 3.0705         | 3.9702         |
| Distance                    | 0.898          | 1.092          | 1.099          |
| Reference                   | NCI/NTP TR-358 | NCI/NTP TR-138 | NCI/NTP TR-336 |

## Model Applicability

Unknown features are fingerprint features in the query molecule, but not found or appearing too infrequently in the training set.

1. Num\_H\_Acceptors out of range. Value: 8. Training min, max, mean, SD: 0, 6, 1.6146, 1.644.
2. Num\_AromaticRings out of range. Value: 3. Training min, max, mean, SD: 0, 2, 0.5625, 0.693.
3. Molecular\_PolarSASA out of range. Value: 243.04. Training min, max, mean, SD: 0, 223.97, 50.816, 55.15.
4. Molecular\_PolarSurfaceArea out of range. Value: 158.01. Training min, max, mean, SD: 0, 138.03, 28.978, 32.1.
5. Unknown FCFP\_2 feature: 8: [\*][N+](=[\*])[\*]
6. Unknown FCFP\_2 feature: 5: [\*][O-]
7. Unknown FCFP\_2 feature: -1549192822: [\*]N=C(/C)[c](:[\*]):[\*]
8. Unknown FCFP\_2 feature: 581019816: [\*]N=N=C\[\*]
9. Unknown FCFP\_2 feature: 1294285001: [\*]=NN[c](:[\*]):[\*]
10. Unknown FCFP\_2 feature: -828984032: [\*][c](:[\*]):[c]([N+](=O)[O-]):[\*]
11. Unknown FCFP\_2 feature: -1338588315: [\*]:[c](:[\*])[N+](=O)[O-]
12. Unknown FCFP\_2 feature: 1872392852: [\*][N+](=O)[\*]
13. Unknown FCFP\_2 feature: 260476081: [\*][N+](=O)[O-]

## Feature Contribution

### Top features for positive contribution

| Fingerprint | Bit/Smiles | Feature Structure | Score |
|-------------|------------|-------------------|-------|
|             |            |                   |       |



|                                        |            |                                                                                                                            |        |
|----------------------------------------|------------|----------------------------------------------------------------------------------------------------------------------------|--------|
| FCFP_2                                 | 1          | 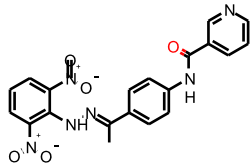<br>[*]=O                               | 0.511  |
| FCFP_2                                 | 3          | <br>[*]N[*]                             | 0.104  |
| Top Features for negative contribution |            |                                                                                                                            |        |
| Fingerprint                            | Bit/Smiles | Feature Structure                                                                                                          | Score  |
| FCFP_2                                 | 136597326  | <br>[*]C(=[*])C                         | -0.489 |
| FCFP_2                                 | 203677720  | <br>[*]C(=[*])[c](:[cH]:[*]):[cH]:[*] | -0.406 |
| FCFP_2                                 | 1872154524 | <br>[*]C(=O)[*]                       | -0.307 |







# Sorafenib

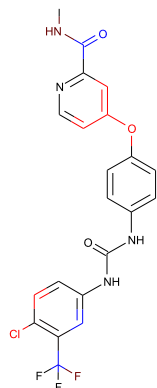

$C_{21}H_{16}ClF_3N_4O_3$

Molecular Weight: 464.82494

ALogP: 4.175

Rotatable Bonds: 6

Acceptors: 4

Donors: 3

## Model Prediction

Prediction: 0.000918

Unit: g/kg\_body\_weight

Mahalanobis Distance: 12.2

Mahalanobis Distance p-value: 4.69e-009

Mahalanobis Distance: The Mahalanobis distance (MD) is a generalization of the Euclidean distance that accounts for correlations among the X properties. It is calculated as the distance to the center of the training data. The larger the MD, the less trustworthy the prediction.

Mahalanobis Distance p-value: The p-value gives the fraction of training data with an MD greater than or equal to the one for the given sample, assuming normally distributed data. The smaller the p-value, the less trustworthy the prediction. For highly non-normal X properties (e.g., fingerprints), the MD p-value is wildly inaccurate.

# TOPKAT\_Rat\_Maximum\_Tolerated\_Dose\_Gavage

## Structural Similar Compounds

| Name                        | OCHRATOXIN     | SULFISOOXAZOLE | PENICILLIN VK  |
|-----------------------------|----------------|----------------|----------------|
| Structure                   |                |                |                |
| Actual Endpoint (-log C)    | 6.28396        | 2.82494        | 2.54455        |
| Predicted Endpoint (-log C) | 5.12358        | 3.0705         | 3.9702         |
| Distance                    | 0.758          | 0.997          | 1.159          |
| Reference                   | NCI/NTP TR-358 | NCI/NTP TR-138 | NCI/NTP TR-336 |

## Model Applicability

Unknown features are fingerprint features in the query molecule, but not found or appearing too infrequently in the training set.

1. Molecular\_Weight out of range. Value: 464.82. Training min, max, mean, SD: 68.074, 434.63, 171.13, 85.06.
2. Num\_AromaticRings out of range. Value: 3. Training min, max, mean, SD: 0, 2, 0.5625, 0.693.
3. OPS\_PC5 out of range. Value: -3.5737. Training min, max, SD, explained variance: -3.4, 4.1587, 1.489, 0.0686.
4. OPS\_PC7 out of range. Value: -3.8342. Training min, max, SD, explained variance: -2.8003, 2.9332, 1.16, 0.0416.
5. Unknown FCFP\_2 feature: 136686699: [\*]NC
6. Unknown FCFP\_2 feature: 1499521844: [\*]NC(=S)N
7. Unknown FCFP\_2 feature: -1029533685: [\*]:[c]:[\*]C(F)(F)F

## Feature Contribution

### Top features for positive contribution

| Fingerprint | Bit/Smiles | Feature Structure | Score |
|-------------|------------|-------------------|-------|
|             |            |                   |       |



|                                        |            |                                                                                                                                            |        |
|----------------------------------------|------------|--------------------------------------------------------------------------------------------------------------------------------------------|--------|
| FCFP_2                                 | 332760439  | 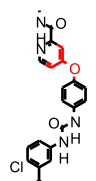<br><chem>[*]O[c](:[cH]:[*]):[c]([*]):[*]</chem>        | 0.672  |
| FCFP_2                                 | 32         | <br><chem>[*]Cl</chem>                                  | 0.526  |
| FCFP_2                                 | 1          | <br><chem>[*]=O</chem>                                  | 0.511  |
| Top Features for negative contribution |            |                                                                                                                                            |        |
| Fingerprint                            | Bit/Smiles | Feature Structure                                                                                                                          | Score  |
| FCFP_2                                 | 203677720  | <br><chem>[*]C(=[*])[c](:[cH]:[*]):[c]([*]):[*]</chem> | -0.406 |
| FCFP_2                                 | 1872154524 | <br><chem>[*]C(=O)[*]</chem>                          | -0.307 |



|        |   |                                                                                                                   |       |
|--------|---|-------------------------------------------------------------------------------------------------------------------|-------|
| FCFP_2 | 0 | 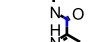<br><chem>[*]C(=[*])[*]</chem> | -0.29 |
|--------|---|-------------------------------------------------------------------------------------------------------------------|-------|



7a

TOPKAT\_Rat\_Oral\_LD50

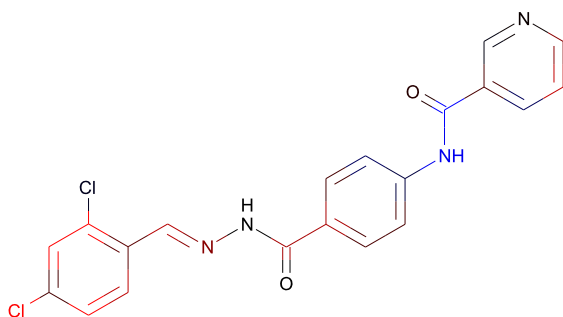
 $C_{20}H_{14}Cl_2N_4O_2$ 

Molecular Weight: 413.25676

ALogP: 3.646

Rotatable Bonds: 5

Acceptors: 4

Donors: 2

## Model Prediction

Prediction: 1.49

Unit: g/kg\_body\_weight

Mahalanobis Distance: 18.5

Mahalanobis Distance p-value: 7.07e-005

Mahalanobis Distance: The Mahalanobis distance (MD) is a generalization of the Euclidean distance that accounts for correlations among the X properties. It is calculated as the distance to the center of the training data. The larger the MD, the less trustworthy the prediction.

Mahalanobis Distance p-value: The p-value gives the fraction of training data with an MD greater than or equal to the one for the given sample, assuming normally distributed data. The smaller the p-value, the less trustworthy the prediction. For highly non-normal X properties (e.g., fingerprints), the MD p-value is wildly inaccurate.

## Structural Similar Compounds

| Name                        | FLUBENDAZOLE   | CARBAMIC ACID; N-(5-BENZOYLBENZIMIDAZOL-2-YL)-; METHYL ESTER | INDOMETHAZINE     |
|-----------------------------|----------------|--------------------------------------------------------------|-------------------|
| Structure                   |                |                                                              |                   |
| Actual Endpoint (-log C)    | 2.088          | 2.617                                                        | 5.17              |
| Predicted Endpoint (-log C) | 2.69288        | 2.2368                                                       | 3.33605           |
| Distance                    | 0.567          | 0.616                                                        | 0.620             |
| Reference                   | YRTMA6 9;11;78 | IYKEDH 19;735;88                                             | ARZNAD 25;1526;75 |

## Model Applicability

Unknown features are fingerprint features in the query molecule, but not found or appearing too infrequently in the training set.

1. All properties and OPS components are within expected ranges.
2. Unknown FCFP\_6 feature: 16: [\*]:[cH]:[\*]
3. Unknown FCFP\_6 feature: 1618154665: [\*]:[cH]:[cH]:[cH]:[\*]
4. Unknown FCFP\_6 feature: 1747237384: [\*]:[cH]:n:[cH]:[\*]
5. Unknown FCFP\_6 feature: -885520711: [\*]C(=[\*])NN=[\*]
6. Unknown FCFP\_6 feature: 581019816: [\*]N\N=C\[\*]
7. Unknown FCFP\_6 feature: -2100785893: [\*]N=C[c](:[\*]):[\*]
8. Unknown FCFP\_6 feature: 71476542: [\*]:[c](:[\*])Cl

## Feature Contribution

### Top features for positive contribution

| Fingerprint | Bit/Smiles | Feature Structure | Score |
|-------------|------------|-------------------|-------|
|             |            |                   |       |



| ECFP_6                                 | 642810091   | 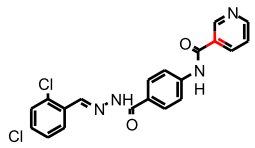<br><chem>[*][c](:[*]):[*]</chem>                          | 0.281  |
|----------------------------------------|-------------|-----------------------------------------------------------------------------------------------------------------------------------------------|--------|
| ECFP_6                                 | -1897341097 | <br><chem>[*]N[*]</chem>                                   | 0.216  |
| ECFP_6                                 | 577592657   | <br><chem>[*][c]1:[*]:[cH]:[cH]<br/>:[c](Cl):[cH]:1</chem> | 0.194  |
| Top Features for negative contribution |             |                                                                                                                                               |        |
| Fingerprint                            | Bit/Smiles  | Feature Structure                                                                                                                             | Score  |
| ECFP_6                                 | -817402818  | <br><chem>[*]Cl</chem>                                   | -0.263 |
| ECFP_6                                 | 655739385   | <br><chem>[*]:n:[*]</chem>                               | -0.239 |



FCFP\_6

555188808

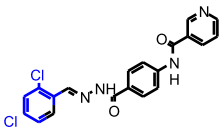

[\*][c]1:[\*]:[cH]:[c](  
Cl):[cH]:[c]:1Cl

-0.119



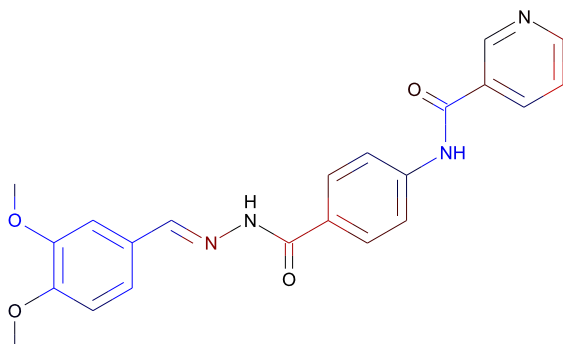

$C_{22}H_{20}N_4O_4$

Molecular Weight: 404.4186

ALogP: 2.284

Rotatable Bonds: 7

Acceptors: 6

Donors: 2

## Model Prediction

Prediction: 4.51

Unit: g/kg\_body\_weight

Mahalanobis Distance: 19.1

Mahalanobis Distance p-value: 3.1e-006

Mahalanobis Distance: The Mahalanobis distance (MD) is a generalization of the Euclidean distance that accounts for correlations among the X properties. It is calculated as the distance to the center of the training data. The larger the MD, the less trustworthy the prediction.

Mahalanobis Distance p-value: The p-value gives the fraction of training data with an MD greater than or equal to the one for the given sample, assuming normally distributed data. The smaller the p-value, the less trustworthy the prediction. For highly non-normal X properties (e.g., fingerprints), the MD p-value is wildly inaccurate.

## Structural Similar Compounds

| Name                        | bis-OXATIN ACETATE | PRASOZIN .HCl (HCl STRIPPED) | ACEMETACIN        |
|-----------------------------|--------------------|------------------------------|-------------------|
| Structure                   |                    |                              |                   |
| Actual Endpoint (-log C)    | 1.717              | 2.294                        | 4.235             |
| Predicted Endpoint (-log C) | 2.40947            | 3.00765                      | 3.39415           |
| Distance                    | 0.582              | 0.617                        | 0.638             |
| Reference                   | NIIRDN 6;609;82    | NIIRDN 6;688;82              | ARZNAD 30;1398;80 |

## Model Applicability

Unknown features are fingerprint features in the query molecule, but not found or appearing too infrequently in the training set.

1. All properties and OPS components are within expected ranges.
2. Unknown FCFP\_6 feature: 16: [\*]:[cH]:[\*]
3. Unknown FCFP\_6 feature: 1618154665: [\*]:[cH]:[cH]:[cH]:[\*]
4. Unknown FCFP\_6 feature: 1747237384: [\*]:[cH]:n:[cH]:[\*]
5. Unknown FCFP\_6 feature: -885520711: [\*]C(=[\*])NN=[\*]
6. Unknown FCFP\_6 feature: 581019816: [\*]N\N=C\[\*]
7. Unknown FCFP\_6 feature: -2100785893: [\*]N=C\[c]([\*]):[\*]

## Feature Contribution

### Top features for positive contribution

| Fingerprint | Bit/Smiles | Feature Structure | Score |
|-------------|------------|-------------------|-------|
|             |            |                   |       |



|                                        |             |                                                                                                                                                  |        |
|----------------------------------------|-------------|--------------------------------------------------------------------------------------------------------------------------------------------------|--------|
| ECFP_6                                 | 642810091   | 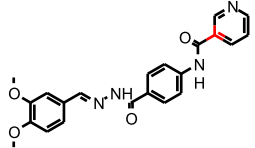<br><chem>[*][c](:[*]):[*]</chem>                             | 0.281  |
| ECFP_6                                 | -1897341097 | <br><chem>[*]N[*]</chem>                                      | 0.216  |
| FCFP_6                                 | 136627117   | <br><chem>[*]OC</chem>                                        | 0.17   |
| Top Features for negative contribution |             |                                                                                                                                                  |        |
| Fingerprint                            | Bit/Smiles  | Feature Structure                                                                                                                                | Score  |
| FCFP_6                                 | 1676877079  | <br><chem>[*]O[c]1:[cH]:[c](C=[*]):[cH]:[*]:[c]:1[*]</chem> | -0.254 |
| ECFP_6                                 | 2077607946  | <br><chem>[*]O[c]1:[cH]:[cH]:[c]([*]):[*]:[c]:1[*]</chem>   | -0.252 |



|        |           |                                                                                                                                                                        |        |
|--------|-----------|------------------------------------------------------------------------------------------------------------------------------------------------------------------------|--------|
| ECFP_6 | 655739385 | 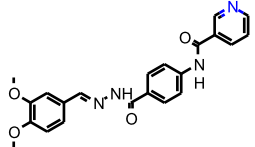<br><chem>COc1cc(OC)c(OC)cc1CN[NH]C(=O)c1ccc(NC(=O)c2ccncc2)cc1</chem><br>[*]:n:[*] | -0.239 |
|--------|-----------|------------------------------------------------------------------------------------------------------------------------------------------------------------------------|--------|



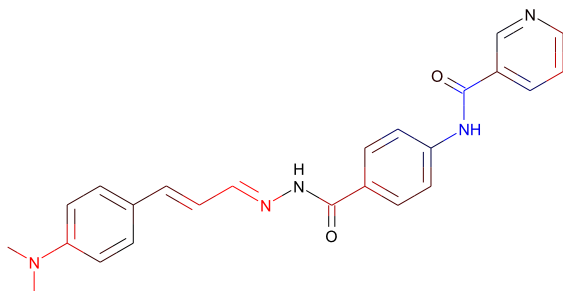

$C_{24}H_{23}N_5O_2$

Molecular Weight: 413.47172

ALogP: 2.839

Rotatable Bonds: 7

Acceptors: 5

Donors: 2

## Model Prediction

Prediction: 1.28

Unit: g/kg\_body\_weight

Mahalanobis Distance: 22.7

Mahalanobis Distance p-value: 1.46e-019

Mahalanobis Distance: The Mahalanobis distance (MD) is a generalization of the Euclidean distance that accounts for correlations among the X properties. It is calculated as the distance to the center of the training data. The larger the MD, the less trustworthy the prediction.

Mahalanobis Distance p-value: The p-value gives the fraction of training data with an MD greater than or equal to the one for the given sample, assuming normally distributed data. The smaller the p-value, the less trustworthy the prediction. For highly non-normal X properties (e.g., fingerprints), the MD p-value is wildly inaccurate.

## Structural Similar Compounds

| Name                        | bis-OXATIN ACETATE | ACRIDINE; 9-[3-(DIMETHYLAMINO)PROPYLAMINO]-1-NITRO- | FLUBENDAZOLE   |
|-----------------------------|--------------------|-----------------------------------------------------|----------------|
| Structure                   |                    |                                                     |                |
| Actual Endpoint (-log C)    | 1.717              | 4.101                                               | 2.088          |
| Predicted Endpoint (-log C) | 2.40947            | 3.3633                                              | 2.69288        |
| Distance                    | 0.616              | 0.635                                               | 0.653          |
| Reference                   | NIIRDN 6;609;82    | MMDPA6 8;252;76                                     | YRTMA6 9;11;78 |

## Model Applicability

Unknown features are fingerprint features in the query molecule, but not found or appearing too infrequently in the training set.

1. All properties and OPS components are within expected ranges.
2. Unknown FCFP\_6 feature: 16: [\*]:[cH]:[\*]
3. Unknown FCFP\_6 feature: 1618154665: [\*]:[cH]:[cH]:[cH]:[\*]
4. Unknown FCFP\_6 feature: 1747237384: [\*]:[cH]:n:[cH]:[\*]
5. Unknown FCFP\_6 feature: -885520711: [\*]C(=[\*])NN=[\*]
6. Unknown FCFP\_6 feature: 581019816: [\*]N\N=C\[\*]
7. Unknown FCFP\_6 feature: 451371068: [\*]\C=C\[c](:[\*]):[\*]

## Feature Contribution

### Top features for positive contribution

| Fingerprint | Bit/Smiles | Feature Structure | Score |
|-------------|------------|-------------------|-------|
|             |            |                   |       |



| ECFP_6                                 | 865379614   | 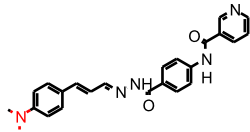<br><chem>[*]N([*])C</chem>       | 0.322  |
|----------------------------------------|-------------|----------------------------------------------------------------------------------------------------------------------|--------|
| ECFP_6                                 | 642810091   | <br><chem>[*][c](:[*]):[*]</chem> | 0.281  |
| ECFP_6                                 | -1897341097 | <br><chem>[*]N[*]</chem>          | 0.216  |
| Top Features for negative contribution |             |                                                                                                                      |        |
| Fingerprint                            | Bit/Smiles  | Feature Structure                                                                                                    | Score  |
| ECFP_6                                 | 655739385   | <br><chem>[*]:n:[*]</chem>      | -0.239 |
| ECFP_6                                 | 734603939   | <br><chem>[*]C</chem>           | -0.201 |



FCFP\_6

-1549103449

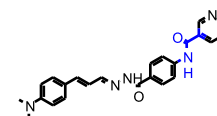

[\*]NC(=O)[c](:[\*]):[\*]  
]

-0.117



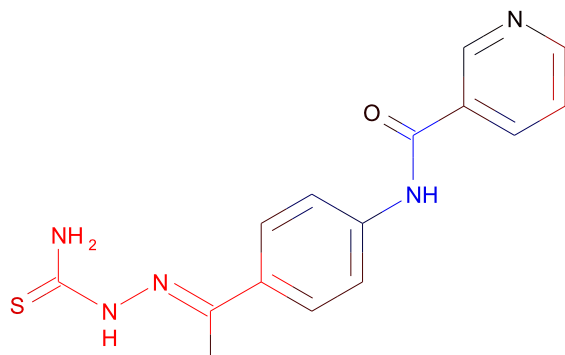

$C_{15}H_{15}N_5OS$

Molecular Weight: 313.3775

ALogP: 1.414

Rotatable Bonds: 5

Acceptors: 4

Donors: 3

## Model Prediction

Prediction: 0.477

Unit: g/kg\_body\_weight

Mahalanobis Distance: 22.3

Mahalanobis Distance p-value: 1.71e-017

Mahalanobis Distance: The Mahalanobis distance (MD) is a generalization of the Euclidean distance that accounts for correlations among the X properties. It is calculated as the distance to the center of the training data. The larger the MD, the less trustworthy the prediction.

Mahalanobis Distance p-value: The p-value gives the fraction of training data with an MD greater than or equal to the one for the given sample, assuming normally distributed data. The smaller the p-value, the less trustworthy the prediction. For highly non-normal X properties (e.g., fingerprints), the MD p-value is wildly inaccurate.

## Structural Similar Compounds

| Name                        | SULFAMETHIZOLE  | SULFAFURAZOLE   | CARBUTAMIDE     |
|-----------------------------|-----------------|-----------------|-----------------|
| Structure                   |                 |                 |                 |
| Actual Endpoint (-log C)    | 1.687           | 1.427           | 1.541           |
| Predicted Endpoint (-log C) | 1.85826         | 1.37011         | 1.48568         |
| Distance                    | 0.628           | 0.633           | 0.636           |
| Reference                   | NIIRDN 6;388;82 | NIIRDN 6;391;82 | FATOAO 25;93;62 |

## Model Applicability

Unknown features are fingerprint features in the query molecule, but not found or appearing too infrequently in the training set.

1. All properties and OPS components are within expected ranges.
2. Unknown ECFP\_2 feature: 128986386: [\*]N=C(/C)\[c](:[\*]):[\*]
3. Unknown FCFP\_6 feature: 16: [\*]:[cH]:[\*]
4. Unknown FCFP\_6 feature: 1618154665: [\*]:[cH]:[cH]:[cH]:[\*]
5. Unknown FCFP\_6 feature: 1747237384: [\*]:[cH]:n:[cH]:[\*]
6. Unknown FCFP\_6 feature: 581019816: [\*]N\N=C\[\*]
7. Unknown FCFP\_6 feature: -885520711: [\*]C(=[\*])NN=[\*]

## Feature Contribution

### Top features for positive contribution

| Fingerprint | Bit/Smiles | Feature Structure | Score |
|-------------|------------|-------------------|-------|
|             |            |                   |       |



|                                        |                   |                                                                                                                      |              |
|----------------------------------------|-------------------|----------------------------------------------------------------------------------------------------------------------|--------------|
| ECFP_6                                 | 642810091         | 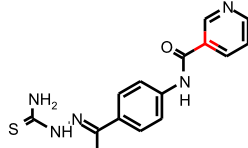<br><chem>[*][c](:[*]):[*]</chem> | 0.281        |
| FCFP_6                                 | 1499521844        | <br><chem>[*]NC(=S)N</chem>       | 0.258        |
| ECFP_6                                 | -1897341097       | <br><chem>[*]N[*]</chem>          | 0.216        |
| Top Features for negative contribution |                   |                                                                                                                      |              |
| <b>Fingerprint</b>                     | <b>Bit/Smiles</b> | <b>Feature Structure</b>                                                                                             | <b>Score</b> |
| ECFP_6                                 | 655739385         | <br><chem>[*]:n:[*]</chem>      | -0.239       |
| ECFP_6                                 | 734603939         | <br><chem>[*]C</chem>           | -0.201       |



|        |             |                                                                                                                                                       |        |
|--------|-------------|-------------------------------------------------------------------------------------------------------------------------------------------------------|--------|
| FCFP_6 | -1549103449 | 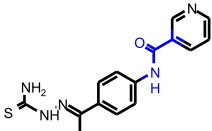 <p data-bbox="1386 280 1549 329">[*]NC(=O)[c](:[*]):[*]<br/>]</p> | -0.117 |
|--------|-------------|-------------------------------------------------------------------------------------------------------------------------------------------------------|--------|



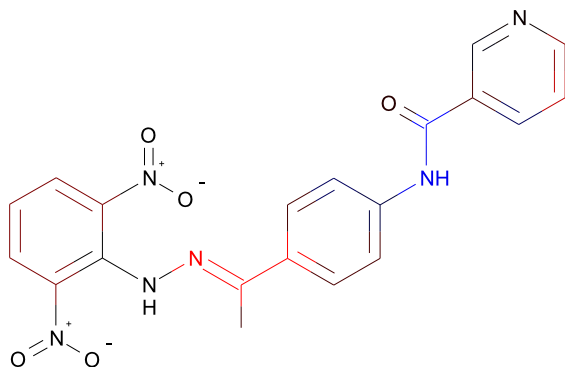
 $C_{20}H_{16}N_6O_5$ 

Molecular Weight: 420.37824

ALogP: 2.852

Rotatable Bonds: 7

Acceptors: 8

Donors: 2

## Model Prediction

Prediction: 2.14

Unit: g/kg\_body\_weight

Mahalanobis Distance: 22.3

Mahalanobis Distance p-value: 1.04e-017

Mahalanobis Distance: The Mahalanobis distance (MD) is a generalization of the Euclidean distance that accounts for correlations among the X properties. It is calculated as the distance to the center of the training data. The larger the MD, the less trustworthy the prediction.

Mahalanobis Distance p-value: The p-value gives the fraction of training data with an MD greater than or equal to the one for the given sample, assuming normally distributed data. The smaller the p-value, the less trustworthy the prediction. For highly non-normal X properties (e.g., fingerprints), the MD p-value is wildly inaccurate.

## Structural Similar Compounds

| Name                        | BENZOTHAZOLE; 6-NITRO-2-(p-NITROBENZOYLAMINO)- | AZOSEMIDE        | FEBANTEL          |
|-----------------------------|------------------------------------------------|------------------|-------------------|
| Structure                   |                                                |                  |                   |
| Actual Endpoint (-log C)    | 2.361                                          | 2.163            | 1.624             |
| Predicted Endpoint (-log C) | 2.96257                                        | 2.21052          | 2.37098           |
| Distance                    | 0.679                                          | 0.726            | 0.751             |
| Reference                   | JPETAB 90;260;47                               | IYKEDH 18;666;87 | ARZNAD 28;2193;78 |

## Model Applicability

Unknown features are fingerprint features in the query molecule, but not found or appearing too infrequently in the training set.

1. All properties and OPS components are within expected ranges.
2. Unknown ECFP\_2 feature: 1043790491: [\*][N+](=[\*])[\*]
3. Unknown ECFP\_2 feature: 781519895: [\*][O-]
4. Unknown ECFP\_2 feature: 128986386: [\*]N=C(/C)[c](:[\*]):[\*]
5. Unknown ECFP\_2 feature: -1956535100: [\*][c](:[\*]):[c]([N+](=[\*])[\*]):c:[\*]
6. Unknown ECFP\_2 feature: -215026467: [\*]:[c](:[\*])[N+](=O)[O-]
7. Unknown ECFP\_2 feature: 2104376220: [\*][N+](=O)[\*]
8. Unknown ECFP\_2 feature: -659271057: [\*][N+](=[\*])[O-]
9. Unknown FCFP\_6 feature: 16: [\*]:[cH]:[\*]
10. Unknown FCFP\_6 feature: 8: [\*][N+](=[\*])[\*]
11. Unknown FCFP\_6 feature: 5: [\*][O-]
12. Unknown FCFP\_6 feature: 1618154665: [\*]:[cH]:[cH]:[cH]:[\*]
13. Unknown FCFP\_6 feature: 1747237384: [\*]:[cH]:n:[cH]:[\*]
14. Unknown FCFP\_6 feature: 581019816: [\*]N\N=C\[\*]
15. Unknown FCFP\_6 feature: 1294285001: [\*]=NN[c](:[\*]):[\*]
16. Unknown FCFP\_6 feature: -828984032: [\*][c](:[\*]):[c](:[cH]:[\*])[N+](=[\*])[\*]
17. Unknown FCFP\_6 feature: -1338588315: [\*]:[c](:[\*])[N+](=O)[O-]
18. Unknown FCFP\_6 feature: 1872392852: [\*][N+](=O)[\*]
19. Unknown FCFP\_6 feature: 260476081: [\*][N+](=[\*])[O-]



## Feature Contribution

| Top features for positive contribution |            |                                                                                                                        |        |
|----------------------------------------|------------|------------------------------------------------------------------------------------------------------------------------|--------|
| Fingerprint                            | Bit/Smiles | Feature Structure                                                                                                      | Score  |
| ECFP_6                                 | 642810091  | 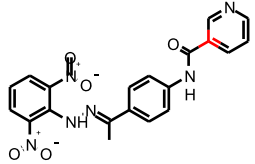<br><chem>[*][c](:[*]):[*]</chem>   | 0.281  |
| ECFP_6                                 | 1897341097 | <br><chem>[*]N[*]</chem>            | 0.216  |
| FCFP_6                                 | 1549192822 | <br><chem>[*]N=C(C)[c](:[*])</chem> | 0.168  |
| Top Features for negative contribution |            |                                                                                                                        |        |
| Fingerprint                            | Bit/Smiles | Feature Structure                                                                                                      | Score  |
| ECFP_6                                 | 655739385  | <br><chem>[*]:n:[*]</chem>        | -0.239 |
|                                        |            |                                                                                                                        |        |



|        |             |                                                                                                                    |        |
|--------|-------------|--------------------------------------------------------------------------------------------------------------------|--------|
| ECFP_6 | 734603939   | 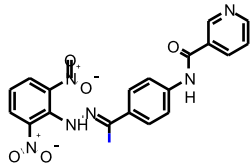<br>[*]C                        | -0.201 |
| FCFP_6 | -1549103449 | <br>[*]NC(=O)[c](:[*]):[*]<br>] | -0.117 |



# Sorafenib

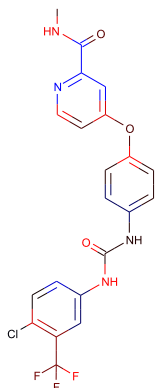
$$\text{C}_{21}\text{H}_{16}\text{ClF}_3\text{N}_4\text{O}_3$$

Molecular Weight: 464.82494

|ALogP: 4.175

Rotatable Bonds: 6

Acceptors: 4

Donors: 3

## Model Prediction

Prediction: 0.823

Unit: g/kg\_body\_weight

Mahalanobis Distance: 21

Mahalanobis Distance p-value: 1.93e-012

**Mahalanobis Distance:** The Mahalanobis distance (MD) is a generalization of the Euclidean distance that accounts for correlations among the X properties. It is calculated as the distance to the center of the training data. The larger the MD, the less trustworthy the prediction.

Mahalanobis Distance p-value: The p-value gives the fraction of training data with an MD greater than or equal to the one for the given sample, assuming normally distributed data. The smaller the p-value, the less trustworthy the prediction. For highly non-normal X properties (e.g., fingerprints), the MD p-value is wildly inaccurate.

## TOPKAT Rat Oral LD50

## Structural Similar Compounds

| Name                        | FLUBENDAZOLE                                                                        | PHOSPHORAMIDOTHIOIC ACID; ACETIMIDOYL-; O;O-bis-(p-CHLOROPHENYL)ESTER               | BEZAFIBRATE                                                                         |
|-----------------------------|-------------------------------------------------------------------------------------|-------------------------------------------------------------------------------------|-------------------------------------------------------------------------------------|
| Structure                   | 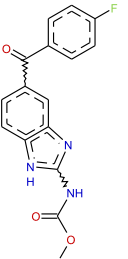 |  |  |
| Actual Endpoint (-log C)    | 2.088                                                                               | 5.006                                                                               | 1.946                                                                               |
| Predicted Endpoint (-log C) | 2.69288                                                                             | 3.23989                                                                             | 2.54395                                                                             |
| Distance                    | 0.697                                                                               | 0.703                                                                               | 0.721                                                                               |
| Reference                   | YRTMA6 9;11;78                                                                      | FMCHA2 -;C149;89                                                                    | ARZNAD 30;2023;80                                                                   |

## Model Applicability

Unknown features are fingerprint features in the query molecule, but not found or appearing too infrequently in the training set.

1. All properties and OPS components are within expected ranges.
2. Unknown FCFP\_6 feature: 16: [\*]:[cH]:[\*]
3. Unknown FCFP\_6 feature: 1618154665: [\*]:[cH]:[cH]:[cH]:[\*]
4. Unknown FCFP\_6 feature: 1747237384: [\*]:[cH]:n:[cH]:[\*]
5. Unknown FCFP\_6 feature: 136686699: [\*]NC
6. Unknown FCFP\_6 feature: 71476542: [\*]:[c]([[\*])Cl

## Feature Contribution

### Top features for positive contribution

| Fingerprint | Bit/Smiles | Feature Structure | Score |
|-------------|------------|-------------------|-------|
|             |            |                   |       |



|                                        |             |                                                                                                                      |        |
|----------------------------------------|-------------|----------------------------------------------------------------------------------------------------------------------|--------|
| FCFP_6                                 | 71953198    | 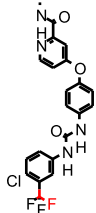<br><chem>[*]C([*])([*])F</chem>  | 0.392  |
| ECFP_6                                 | -1046436026 | <br><chem>[*]F</chem>             | 0.349  |
| ECFP_6                                 | 642810091   | <br><chem>[*][c](:[*]):[*]</chem> | 0.281  |
| Top Features for negative contribution |             |                                                                                                                      |        |
| Fingerprint                            | Bit/Smiles  | Feature Structure                                                                                                    | Score  |
| ECFP_6                                 | 226796801   | <br><chem>[*]C([*])([*])F</chem> | -0.32  |
| ECFP_6                                 | -817402818  | <br><chem>[*]Cl</chem>          | -0.263 |



ECFP\_6

-176455838

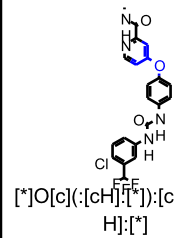

-0.257
